# Supplementary material for: Timoshenko Beam Theory:First-Order Analysis, Second-Order Analysis, Stability, and Vibration Analysis Using the Finite Difference Method
Source: Preprints.org preprint supplement (doi:10.20944/preprints202105.0252.v1), 2021-05-11
Supplement: Supplementary file 1 [file Buckling load of a fixed free beam.xlsx]

## Sheet: w-fi FDM approximation
		Buckling load of a fixed-free beam
				Hu et al. [ ]
			a = EI/kGAl²=
			0.025	2.06076
			0.05	2.11978
			0.075	2.1772
			0.1	2.23315
			0.125	2.28773
			0.15	2.34103
										The governing equations
		W-F FDM approximation
			Nine-point grid
		a = EI/kGAl²=	0.1
		blk =	0.125			Determinant =	8.19007e-05
			-0.0305409			2.24708
	W0	hkF0	W1	hkF1	W2	hkF2	W3	hkF3	W4	hkF4	W5	hkF5	W6	hkF6	W7	hkF7	W8	hkF8	W9	hkF9	W10	hkF10
Gov Eq 1 (1)	0.125709	0.078125	-0.251418	0	0.125709	-0.078125	0	0	0	0	0	0	0	0	0	0	0	0	0	0	0	0		#VALUE!
Gov Eq 2 (1)	-0.078125	1	0	-2.15625	0.078125	1	0	0	0	0	0	0	0	0	0	0	0	0	0	0	0	0		0
Gov Eq 1 (2)	0	0	0.125709	0.078125	-0.251418	0	0.125709	-0.078125	0	0	0	0	0	0	0	0	0	0	0	0	0	0		#VALUE!
Gov Eq 2 (2)	0	0	-0.078125	1	0	-2.15625	0.078125	1	0	0	0	0	0	0	0	0	0	0	0	0	0	0		0
Gov Eq 1 (3)	0	0	0	0	0.125709	0.078125	-0.251418	0	0.125709	-0.078125	0	0	0	0	0	0	0	0	0	0	0	0		#VALUE!
Gov Eq 2 (3)	0	0	0	0	-0.078125	1	0	-2.15625	0.078125	1	0	0	0	0	0	0	0	0	0	0	0	0		0
Gov Eq 1 (4)	0	0	0	0	0	0	0.125709	0.078125	-0.251418	0	0.125709	-0.078125	0	0	0	0	0	0	0	0	0	0		#VALUE!
Gov Eq 2 (4)	0	0	0	0	0	0	-0.078125	1	0	-2.15625	0.078125	1	0	0	0	0	0	0	0	0	0	0		0
Gov Eq 1 (5)	0	0	0	0	0	0	0	0	0.125709	0.078125	-0.251418	0	0.125709	-0.078125	0	0	0	0	0	0	0	0		#VALUE!
Gov Eq 2 (5)	0	0	0	0	0	0	0	0	-0.078125	1	0	-2.15625	0.078125	1	0	0	0	0	0	0	0	0		0
Gov Eq 1 (6)	0	0	0	0	0	0	0	0	0	0	0.125709	0.078125	-0.251418	0	0.125709	-0.078125	0	0	0	0	0	0		#VALUE!
Gov Eq 2 (6)	0	0	0	0	0	0	0	0	0	0	-0.078125	1	0	-2.15625	0.078125	1	0	0	0	0	0	0		0
Gov Eq 1 (7)	0	0	0	0	0	0	0	0	0	0	0	0	0.125709	0.078125	-0.251418	0	0.125709	-0.078125	0	0	0	0		#VALUE!
Gov Eq 2 (7)	0	0	0	0	0	0	0	0	0	0	0	0	-0.078125	1	0	-2.15625	0.078125	1	0	0	0	0		0
Gov Eq 1 (8)	0	0	0	0	0	0	0	0	0	0	0	0	0	0	0.125709	0.078125	-0.251418	0	0.125709	-0.078125	0	0		#VALUE!
Gov Eq 2 (8)	0	0	0	0	0	0	0	0	0	0	0	0	0	0	-0.078125	1	0	-2.15625	0.078125	1	0	0		0
Gov Eq 1 (9)	0	0	0	0	0	0	0	0	0	0	0	0	0	0	0	0	0.125709	0.078125	-0.251418	0	0.125709	-0.078125		#VALUE!
Gov Eq 2 (9)	0	0	0	0	0	0	0	0	0	0	0	0	0	0	0	0	-0.078125	1	0	-2.15625	0.078125	1		0
BoCo 1 (1)	0	0	1	0	0	0	0	0	0	0	0	0	0	0	0	0	0	0	0	0	0	0		0
BoCo 2 (1)	0	0	0	1	0	0	0	0	0	0	0	0	0	0	0	0	0	0	0	0	0	0		0
BoCo 1 (9)	0	0	0	0	0	0	0	0	0	0	0	0	0	0	0	0	-0.0628546	0	0	-0.15625	0.0628546	0		0
BoCo 2 (9)	0	0	0	0	0	0	0	0	0	0	0	0	0	0	0	0	0	-1	0	0	0	1		0
										The governing equations
		W-F FDM approximation
			Seventeen-point grid
		a = EI/kGAl²=	0.1
						Determinant =	1.20096e-06
		blk =	0.0625
			-0.00770564			2.23679
	W0	hkF0	W1	hkF1	W2	hkF2	W3	hkF3	W4	hkF4	W5	hkF5	W6	hkF6	W7	hkF7	W8	hkF8	W9	hkF9	W10	hkF10	W11	hkF11	W12	hkF12	W13	hkF13	W14	hkF14	W15	hkF15	W16	hkF16	W17	hkF17	W18	hkF18
Gov Eq 1 (1)	0.0313569	0.0195312	-0.0627137	0	0.0313569	-0.0195312	0	0	0	0	0	0	0	0	0	0	0	0	0	0	0	0	0	0	0	0	0	0	0	0	0	0	0	0	0	0	0	0		#VALUE!
Gov Eq 2 (1)	-0.0195312	1	0	-2.03906	0.0195312	1	0	0	0	0	0	0	0	0	0	0	0	0	0	0	0	0	0	0	0	0	0	0	0	0	0	0	0	0	0	0	0	0		0
Gov Eq 1 (2)	0	0	0.0313569	0.0195312	-0.0627137	0	0.0313569	-0.0195312	0	0	0	0	0	0	0	0	0	0	0	0	0	0	0	0	0	0	0	0	0	0	0	0	0	0	0	0	0	0		#VALUE!
Gov Eq 2 (2)	0	0	-0.0195312	1	0	-2.03906	0.0195312	1	0	0	0	0	0	0	0	0	0	0	0	0	0	0	0	0	0	0	0	0	0	0	0	0	0	0	0	0	0	0		0
Gov Eq 1 (3)	0	0	0	0	0.0313569	0.0195312	-0.0627137	0	0.0313569	-0.0195312	0	0	0	0	0	0	0	0	0	0	0	0	0	0	0	0	0	0	0	0	0	0	0	0	0	0	0	0		#VALUE!
Gov Eq 2 (3)	0	0	0	0	-0.0195312	1	0	-2.03906	0.0195312	1	0	0	0	0	0	0	0	0	0	0	0	0	0	0	0	0	0	0	0	0	0	0	0	0	0	0	0	0		0
Gov Eq 1 (4)	0	0	0	0	0	0	0.0313569	0.0195312	-0.0627137	0	0.0313569	-0.0195312	0	0	0	0	0	0	0	0	0	0	0	0	0	0	0	0	0	0	0	0	0	0	0	0	0	0		#VALUE!
Gov Eq 2 (4)	0	0	0	0	0	0	-0.0195312	1	0	-2.03906	0.0195312	1	0	0	0	0	0	0	0	0	0	0	0	0	0	0	0	0	0	0	0	0	0	0	0	0	0	0		0
Gov Eq 1 (5)	0	0	0	0	0	0	0	0	0.0313569	0.0195312	-0.0627137	0	0.0313569	-0.0195312	0	0	0	0	0	0	0	0	0	0	0	0	0	0	0	0	0	0	0	0	0	0	0	0		#VALUE!
Gov Eq 2 (5)	0	0	0	0	0	0	0	0	-0.0195312	1	0	-2.03906	0.0195312	1	0	0	0	0	0	0	0	0	0	0	0	0	0	0	0	0	0	0	0	0	0	0	0	0		0
Gov Eq 1 (6)	0	0	0	0	0	0	0	0	0	0	0.0313569	0.0195312	-0.0627137	0	0.0313569	-0.0195312	0	0	0	0	0	0	0	0	0	0	0	0	0	0	0	0	0	0	0	0	0	0		#VALUE!
Gov Eq 2 (6)	0	0	0	0	0	0	0	0	0	0	-0.0195312	1	0	-2.03906	0.0195312	1	0	0	0	0	0	0	0	0	0	0	0	0	0	0	0	0	0	0	0	0	0	0		0
Gov Eq 1 (7)	0	0	0	0	0	0	0	0	0	0	0	0	0.0313569	0.0195312	-0.0627137	0	0.0313569	-0.0195312	0	0	0	0	0	0	0	0	0	0	0	0	0	0	0	0	0	0	0	0		#VALUE!
Gov Eq 2 (7)	0	0	0	0	0	0	0	0	0	0	0	0	-0.0195312	1	0	-2.03906	0.0195312	1	0	0	0	0	0	0	0	0	0	0	0	0	0	0	0	0	0	0	0	0		0
Gov Eq 1 (8)	0	0	0	0	0	0	0	0	0	0	0	0	0	0	0.0313569	0.0195312	-0.0627137	0	0.0313569	-0.0195312	0	0	0	0	0	0	0	0	0	0	0	0	0	0	0	0	0	0		#VALUE!
Gov Eq 2 (8)	0	0	0	0	0	0	0	0	0	0	0	0	0	0	-0.0195312	1	0	-2.03906	0.0195312	1	0	0	0	0	0	0	0	0	0	0	0	0	0	0	0	0	0	0		0
Gov Eq 1 (9)	0	0	0	0	0	0	0	0	0	0	0	0	0	0	0	0	0.0313569	0.0195312	-0.0627137	0	0.0313569	-0.0195312	0	0	0	0	0	0	0	0	0	0	0	0	0	0	0	0		#VALUE!
Gov Eq 2 (9)	0	0	0	0	0	0	0	0	0	0	0	0	0	0	0	0	-0.0195312	1	0	-2.03906	0.0195312	1	0	0	0	0	0	0	0	0	0	0	0	0	0	0	0	0		0
Gov Eq 1 (10)	0	0	0	0	0	0	0	0	0	0	0	0	0	0	0	0	0	0	0.0313569	0.0195312	-0.0627137	0	0.0313569	-0.0195312	0	0	0	0	0	0	0	0	0	0	0	0	0	0		#VALUE!
Gov Eq 2 (10)	0	0	0	0	0	0	0	0	0	0	0	0	0	0	0	0	0	0	-0.0195312	1	0	-2.03906	0.0195312	1	0	0	0	0	0	0	0	0	0	0	0	0	0	0		0
Gov Eq 1 (11)	0	0	0	0	0	0	0	0	0	0	0	0	0	0	0	0	0	0	0	0	0.0313569	0.0195312	-0.0627137	0	0.0313569	-0.0195312	0	0	0	0	0	0	0	0	0	0	0	0		#VALUE!
Gov Eq 2 (11)	0	0	0	0	0	0	0	0	0	0	0	0	0	0	0	0	0	0	0	0	-0.0195312	1	0	-2.03906	0.0195312	1	0	0	0	0	0	0	0	0	0	0	0	0		0
Gov Eq 1 (12)	0	0	0	0	0	0	0	0	0	0	0	0	0	0	0	0	0	0	0	0	0	0	0.0313569	0.0195312	-0.0627137	0	0.0313569	-0.0195312	0	0	0	0	0	0	0	0	0	0		#VALUE!
Gov Eq 2 (12)	0	0	0	0	0	0	0	0	0	0	0	0	0	0	0	0	0	0	0	0	0	0	-0.0195312	1	0	-2.03906	0.0195312	1	0	0	0	0	0	0	0	0	0	0		0
Gov Eq 1 (13)	0	0	0	0	0	0	0	0	0	0	0	0	0	0	0	0	0	0	0	0	0	0	0	0	0.0313569	0.0195312	-0.0627137	0	0.0313569	-0.0195312	0	0	0	0	0	0	0	0		#VALUE!
Gov Eq 2 (13)	0	0	0	0	0	0	0	0	0	0	0	0	0	0	0	0	0	0	0	0	0	0	0	0	-0.0195312	1	0	-2.03906	0.0195312	1	0	0	0	0	0	0	0	0		0
Gov Eq 1 (14)	0	0	0	0	0	0	0	0	0	0	0	0	0	0	0	0	0	0	0	0	0	0	0	0	0	0	0.0313569	0.0195312	-0.0627137	0	0.0313569	-0.0195312	0	0	0	0	0	0		#VALUE!
Gov Eq 2 (14)	0	0	0	0	0	0	0	0	0	0	0	0	0	0	0	0	0	0	0	0	0	0	0	0	0	0	-0.0195312	1	0	-2.03906	0.0195312	1	0	0	0	0	0	0		0
Gov Eq 1 (15)	0	0	0	0	0	0	0	0	0	0	0	0	0	0	0	0	0	0	0	0	0	0	0	0	0	0	0	0	0.0313569	0.0195312	-0.0627137	0	0.0313569	-0.0195312	0	0	0	0		#VALUE!
Gov Eq 2 (15)	0	0	0	0	0	0	0	0	0	0	0	0	0	0	0	0	0	0	0	0	0	0	0	0	0	0	0	0	-0.0195312	1	0	-2.03906	0.0195312	1	0	0	0	0		0
Gov Eq 1 (16)	0	0	0	0	0	0	0	0	0	0	0	0	0	0	0	0	0	0	0	0	0	0	0	0	0	0	0	0	0	0	0.0313569	0.0195312	-0.0627137	0	0.0313569	-0.0195312	0	0		#VALUE!
Gov Eq 2 (16)	0	0	0	0	0	0	0	0	0	0	0	0	0	0	0	0	0	0	0	0	0	0	0	0	0	0	0	0	0	0	-0.0195312	1	0	-2.03906	0.0195312	1	0	0		0
Gov Eq 1 (17)	0	0	0	0	0	0	0	0	0	0	0	0	0	0	0	0	0	0	0	0	0	0	0	0	0	0	0	0	0	0	0	0	0.0313569	0.0195312	-0.0627137	0	0.0313569	-0.0195312		#VALUE!
Gov Eq 2 (17)	0	0	0	0	0	0	0	0	0	0	0	0	0	0	0	0	0	0	0	0	0	0	0	0	0	0	0	0	0	0	0	0	-0.0195312	1	0	-2.03906	0.0195312	1		0
BoCo 1 (1)	0	0	1	0	0	0	0	0	0	0	0	0	0	0	0	0	0	0	0	0	0	0	0	0	0	0	0	0	0	0	0	0	0	0	0	0	0	0		0
BoCo 2 (1)	0	0	0	1	0	0	0	0	0	0	0	0	0	0	0	0	0	0	0	0	0	0	0	0	0	0	0	0	0	0	0	0	0	0	0	0	0	0		0
BoCo 1 (17)	0	0	0	0	0	0	0	0	0	0	0	0	0	0	0	0	0	0	0	0	0	0	0	0	0	0	0	0	0	0	0	0	-0.0156784	0	0	-0.0390625	0.0156784	0		0
BoCo 2 (17)	0	0	0	0	0	0	0	0	0	0	0	0	0	0	0	0	0	0	0	0	0	0	0	0	0	0	0	0	0	0	0	0	0	1	0	0	0	-1		0
		W-F FDM approximation
			Twenty five-point grid
						The governing equations
		a = EI/kGAl²=	0.1
						Determinant =	1.32353e-05
		blk =	0.0416667
			-0.00343089			2.23478
	W0	hkF0	W1	hkF1	W2	hkF2	W3	hkF3	W4	hkF4	W5	hkF5	W6	hkF6	W7	hkF7	W8	hkF8	W9	hkF9	W10	hkF10	W11	hkF11	W12	hkF12	W13	hkF13	W14	hkF14	W15	hkF15	W16	hkF16	W17	hkF17	W18	hkF18	W19	hkF19	W20	hkF20	W21	hkF21	W22	hkF22	W23	hkF23	W24
Gov Eq 1 (1)	0.0139302	0.00868056	-0.0278604	0	0.0139302	-0.00868056	0	0	0	0	0	0	0	0	0	0	0	0	0	0	0	0	0	0	0	0	0	0	0	0	0	0	0	0	0	0	0	0	0	0	0	0	0	0	0	0	0	0	0
Gov Eq 2 (1)	-0.00868056	1	0	-2.01736	0.00868056	1	0	0	0	0	0	0	0	0	0	0	0	0	0	0	0	0	0	0	0	0	0	0	0	0	0	0	0	0	0	0	0	0	0	0	0	0	0	0	0	0	0	0	0
Gov Eq 1 (2)	0	0	0.0139302	0.00868056	-0.0278604	0	0.0139302	-0.00868056	0	0	0	0	0	0	0	0	0	0	0	0	0	0	0	0	0	0	0	0	0	0	0	0	0	0	0	0	0	0	0	0	0	0	0	0	0	0	0	0	0
Gov Eq 2 (2)	0	0	-0.00868056	1	0	-2.01736	0.00868056	1	0	0	0	0	0	0	0	0	0	0	0	0	0	0	0	0	0	0	0	0	0	0	0	0	0	0	0	0	0	0	0	0	0	0	0	0	0	0	0	0	0
Gov Eq 1 (3)	0	0	0	0	0.0139302	0.00868056	-0.0278604	0	0.0139302	-0.00868056	0	0	0	0	0	0	0	0	0	0	0	0	0	0	0	0	0	0	0	0	0	0	0	0	0	0	0	0	0	0	0	0	0	0	0	0	0	0	0
Gov Eq 2 (3)	0	0	0	0	-0.00868056	1	0	-2.01736	0.00868056	1	0	0	0	0	0	0	0	0	0	0	0	0	0	0	0	0	0	0	0	0	0	0	0	0	0	0	0	0	0	0	0	0	0	0	0	0	0	0	0
Gov Eq 1 (4)	0	0	0	0	0	0	0.0139302	0.00868056	-0.0278604	0	0.0139302	-0.00868056	0	0	0	0	0	0	0	0	0	0	0	0	0	0	0	0	0	0	0	0	0	0	0	0	0	0	0	0	0	0	0	0	0	0	0	0	0
Gov Eq 2 (4)	0	0	0	0	0	0	-0.00868056	1	0	-2.01736	0.00868056	1	0	0	0	0	0	0	0	0	0	0	0	0	0	0	0	0	0	0	0	0	0	0	0	0	0	0	0	0	0	0	0	0	0	0	0	0	0
Gov Eq 1 (5)	0	0	0	0	0	0	0	0	0.0139302	0.00868056	-0.0278604	0	0.0139302	-0.00868056	0	0	0	0	0	0	0	0	0	0	0	0	0	0	0	0	0	0	0	0	0	0	0	0	0	0	0	0	0	0	0	0	0	0	0
Gov Eq 2 (5)	0	0	0	0	0	0	0	0	-0.00868056	1	0	-2.01736	0.00868056	1	0	0	0	0	0	0	0	0	0	0	0	0	0	0	0	0	0	0	0	0	0	0	0	0	0	0	0	0	0	0	0	0	0	0	0
Gov Eq 1 (6)	0	0	0	0	0	0	0	0	0	0	0.0139302	0.00868056	-0.0278604	0	0.0139302	-0.00868056	0	0	0	0	0	0	0	0	0	0	0	0	0	0	0	0	0	0	0	0	0	0	0	0	0	0	0	0	0	0	0	0	0
Gov Eq 2 (6)	0	0	0	0	0	0	0	0	0	0	-0.00868056	1	0	-2.01736	0.00868056	1	0	0	0	0	0	0	0	0	0	0	0	0	0	0	0	0	0	0	0	0	0	0	0	0	0	0	0	0	0	0	0	0	0
Gov Eq 1 (7)	0	0	0	0	0	0	0	0	0	0	0	0	0.0139302	0.00868056	-0.0278604	0	0.0139302	-0.00868056	0	0	0	0	0	0	0	0	0	0	0	0	0	0	0	0	0	0	0	0	0	0	0	0	0	0	0	0	0	0	0
Gov Eq 2 (7)	0	0	0	0	0	0	0	0	0	0	0	0	-0.00868056	1	0	-2.01736	0.00868056	1	0	0	0	0	0	0	0	0	0	0	0	0	0	0	0	0	0	0	0	0	0	0	0	0	0	0	0	0	0	0	0
Gov Eq 1 (8)	0	0	0	0	0	0	0	0	0	0	0	0	0	0	0.0139302	0.00868056	-0.0278604	0	0.0139302	-0.00868056	0	0	0	0	0	0	0	0	0	0	0	0	0	0	0	0	0	0	0	0	0	0	0	0	0	0	0	0	0
Gov Eq 2 (8)	0	0	0	0	0	0	0	0	0	0	0	0	0	0	-0.00868056	1	0	-2.01736	0.00868056	1	0	0	0	0	0	0	0	0	0	0	0	0	0	0	0	0	0	0	0	0	0	0	0	0	0	0	0	0	0
Gov Eq 1 (9)	0	0	0	0	0	0	0	0	0	0	0	0	0	0	0	0	0.0139302	0.00868056	-0.0278604	0	0.0139302	-0.00868056	0	0	0	0	0	0	0	0	0	0	0	0	0	0	0	0	0	0	0	0	0	0	0	0	0	0	0
Gov Eq 2 (9)	0	0	0	0	0	0	0	0	0	0	0	0	0	0	0	0	-0.00868056	1	0	-2.01736	0.00868056	1	0	0	0	0	0	0	0	0	0	0	0	0	0	0	0	0	0	0	0	0	0	0	0	0	0	0	0
Gov Eq 1 (10)	0	0	0	0	0	0	0	0	0	0	0	0	0	0	0	0	0	0	0.0139302	0.00868056	-0.0278604	0	0.0139302	-0.00868056	0	0	0	0	0	0	0	0	0	0	0	0	0	0	0	0	0	0	0	0	0	0	0	0	0
Gov Eq 2 (10)	0	0	0	0	0	0	0	0	0	0	0	0	0	0	0	0	0	0	-0.00868056	1	0	-2.01736	0.00868056	1	0	0	0	0	0	0	0	0	0	0	0	0	0	0	0	0	0	0	0	0	0	0	0	0	0
Gov Eq 1 (11)	0	0	0	0	0	0	0	0	0	0	0	0	0	0	0	0	0	0	0	0	0.0139302	0.00868056	-0.0278604	0	0.0139302	-0.00868056	0	0	0	0	0	0	0	0	0	0	0	0	0	0	0	0	0	0	0	0	0	0	0
Gov Eq 2 (11)	0	0	0	0	0	0	0	0	0	0	0	0	0	0	0	0	0	0	0	0	-0.00868056	1	0	-2.01736	0.00868056	1	0	0	0	0	0	0	0	0	0	0	0	0	0	0	0	0	0	0	0	0	0	0	0
Gov Eq 1 (12)	0	0	0	0	0	0	0	0	0	0	0	0	0	0	0	0	0	0	0	0	0	0	0.0139302	0.00868056	-0.0278604	0	0.0139302	-0.00868056	0	0	0	0	0	0	0	0	0	0	0	0	0	0	0	0	0	0	0	0	0
Gov Eq 2 (12)	0	0	0	0	0	0	0	0	0	0	0	0	0	0	0	0	0	0	0	0	0	0	-0.00868056	1	0	-2.01736	0.00868056	1	0	0	0	0	0	0	0	0	0	0	0	0	0	0	0	0	0	0	0	0	0
Gov Eq 1 (13)	0	0	0	0	0	0	0	0	0	0	0	0	0	0	0	0	0	0	0	0	0	0	0	0	0.0139302	0.00868056	-0.0278604	0	0.0139302	-0.00868056	0	0	0	0	0	0	0	0	0	0	0	0	0	0	0	0	0	0	0
Gov Eq 2 (13)	0	0	0	0	0	0	0	0	0	0	0	0	0	0	0	0	0	0	0	0	0	0	0	0	-0.00868056	1	0	-2.01736	0.00868056	1	0	0	0	0	0	0	0	0	0	0	0	0	0	0	0	0	0	0	0
Gov Eq 1 (14)	0	0	0	0	0	0	0	0	0	0	0	0	0	0	0	0	0	0	0	0	0	0	0	0	0	0	0.0139302	0.00868056	-0.0278604	0	0.0139302	-0.00868056	0	0	0	0	0	0	0	0	0	0	0	0	0	0	0	0	0
Gov Eq 2 (14)	0	0	0	0	0	0	0	0	0	0	0	0	0	0	0	0	0	0	0	0	0	0	0	0	0	0	-0.00868056	1	0	-2.01736	0.00868056	1	0	0	0	0	0	0	0	0	0	0	0	0	0	0	0	0	0
Gov Eq 1 (15)	0	0	0	0	0	0	0	0	0	0	0	0	0	0	0	0	0	0	0	0	0	0	0	0	0	0	0	0	0.0139302	0.00868056	-0.0278604	0	0.0139302	-0.00868056	0	0	0	0	0	0	0	0	0	0	0	0	0	0	0
Gov Eq 2 (15)	0	0	0	0	0	0	0	0	0	0	0	0	0	0	0	0	0	0	0	0	0	0	0	0	0	0	0	0	-0.00868056	1	0	-2.01736	0.00868056	1	0	0	0	0	0	0	0	0	0	0	0	0	0	0	0
Gov Eq 1 (16)	0	0	0	0	0	0	0	0	0	0	0	0	0	0	0	0	0	0	0	0	0	0	0	0	0	0	0	0	0	0	0.0139302	0.00868056	-0.0278604	0	0.0139302	-0.00868056	0	0	0	0	0	0	0	0	0	0	0	0	0
Gov Eq 2 (16)	0	0	0	0	0	0	0	0	0	0	0	0	0	0	0	0	0	0	0	0	0	0	0	0	0	0	0	0	0	0	-0.00868056	1	0	-2.01736	0.00868056	1	0	0	0	0	0	0	0	0	0	0	0	0	0
Gov Eq 1 (17)	0	0	0	0	0	0	0	0	0	0	0	0	0	0	0	0	0	0	0	0	0	0	0	0	0	0	0	0	0	0	0	0	0.0139302	0.00868056	-0.0278604	0	0.0139302	-0.00868056	0	0	0	0	0	0	0	0	0	0	0
Gov Eq 2 (17)	0	0	0	0	0	0	0	0	0	0	0	0	0	0	0	0	0	0	0	0	0	0	0	0	0	0	0	0	0	0	0	0	-0.00868056	1	0	-2.01736	0.00868056	1	0	0	0	0	0	0	0	0	0	0	0
Gov Eq 1 (18)	0	0	0	0	0	0	0	0	0	0	0	0	0	0	0	0	0	0	0	0	0	0	0	0	0	0	0	0	0	0	0	0	0	0	0.0139302	0.00868056	-0.0278604	0	0.0139302	-0.00868056	0	0	0	0	0	0	0	0	0
Gov Eq 2 (18)	0	0	0	0	0	0	0	0	0	0	0	0	0	0	0	0	0	0	0	0	0	0	0	0	0	0	0	0	0	0	0	0	0	0	-0.00868056	1	0	-2.01736	0.00868056	1	0	0	0	0	0	0	0	0	0
Gov Eq 1 (19)	0	0	0	0	0	0	0	0	0	0	0	0	0	0	0	0	0	0	0	0	0	0	0	0	0	0	0	0	0	0	0	0	0	0	0	0	0.0139302	0.00868056	-0.0278604	0	0.0139302	-0.00868056	0	0	0	0	0	0	0
Gov Eq 2 (19)	0	0	0	0	0	0	0	0	0	0	0	0	0	0	0	0	0	0	0	0	0	0	0	0	0	0	0	0	0	0	0	0	0	0	0	0	-0.00868056	1	0	-2.01736	0.00868056	1	0	0	0	0	0	0	0
Gov Eq 1 (20)	0	0	0	0	0	0	0	0	0	0	0	0	0	0	0	0	0	0	0	0	0	0	0	0	0	0	0	0	0	0	0	0	0	0	0	0	0	0	0.0139302	0.00868056	-0.0278604	0	0.0139302	-0.00868056	0	0	0	0	0
Gov Eq 2 (20)	0	0	0	0	0	0	0	0	0	0	0	0	0	0	0	0	0	0	0	0	0	0	0	0	0	0	0	0	0	0	0	0	0	0	0	0	0	0	-0.00868056	1	0	-2.01736	0.00868056	1	0	0	0	0	0
Gov Eq 1 (21)	0	0	0	0	0	0	0	0	0	0	0	0	0	0	0	0	0	0	0	0	0	0	0	0	0	0	0	0	0	0	0	0	0	0	0	0	0	0	0	0	0.0139302	0.00868056	-0.0278604	0	0.0139302	-0.00868056	0	0	0
Gov Eq 2 (21)	0	0	0	0	0	0	0	0	0	0	0	0	0	0	0	0	0	0	0	0	0	0	0	0	0	0	0	0	0	0	0	0	0	0	0	0	0	0	0	0	-0.00868056	1	0	-2.01736	0.00868056	1	0	0	0
Gov Eq 1 (22)	0	0	0	0	0	0	0	0	0	0	0	0	0	0	0	0	0	0	0	0	0	0	0	0	0	0	0	0	0	0	0	0	0	0	0	0	0	0	0	0	0	0	0.0139302	0.00868056	-0.0278604	0	0.0139302	-0.00868056	0
Gov Eq 2 (22)	0	0	0	0	0	0	0	0	0	0	0	0	0	0	0	0	0	0	0	0	0	0	0	0	0	0	0	0	0	0	0	0	0	0	0	0	0	0	0	0	0	0	-0.00868056	1	0	-2.01736	0.00868056	1	0
Gov Eq 1 (23)	0	0	0	0	0	0	0	0	0	0	0	0	0	0	0	0	0	0	0	0	0	0	0	0	0	0	0	0	0	0	0	0	0	0	0	0	0	0	0	0	0	0	0	0	0.0139302	0.00868056	-0.0278604	0	0.0139302
Gov Eq 2 (23)	0	0	0	0	0	0	0	0	0	0	0	0	0	0	0	0	0	0	0	0	0	0	0	0	0	0	0	0	0	0	0	0	0	0	0	0	0	0	0	0	0	0	0	0	-0.00868056	1	0	-2.01736	0.00868056
Gov Eq 1 (24)	0	0	0	0	0	0	0	0	0	0	0	0	0	0	0	0	0	0	0	0	0	0	0	0	0	0	0	0	0	0	0	0	0	0	0	0	0	0	0	0	0	0	0	0	0	0	0.0139302	0.00868056	-0.0278604
Gov Eq 2 (24)	0	0	0	0	0	0	0	0	0	0	0	0	0	0	0	0	0	0	0	0	0	0	0	0	0	0	0	0	0	0	0	0	0	0	0	0	0	0	0	0	0	0	0	0	0	0	-0.00868056	1	0
Gov Eq 1 (25)	0	0	0	0	0	0	0	0	0	0	0	0	0	0	0	0	0	0	0	0	0	0	0	0	0	0	0	0	0	0	0	0	0	0	0	0	0	0	0	0	0	0	0	0	0	0	0	0	0.0139302
Gov Eq 2 (25)	0	0	0	0	0	0	0	0	0	0	0	0	0	0	0	0	0	0	0	0	0	0	0	0	0	0	0	0	0	0	0	0	0	0	0	0	0	0	0	0	0	0	0	0	0	0	0	0	-0.00868056
BoCo 1 (1)	0	0	1	0	0	0	0	0	0	0	0	0	0	0	0	0	0	0	0	0	0	0	0	0	0	0	0	0	0	0	0	0	0	0	0	0	0	0	0	0	0	0	0	0	0	0	0	0	0
BoCo 2 (1)	0	0	0	1	0	0	0	0	0	0	0	0	0	0	0	0	0	0	0	0	0	0	0	0	0	0	0	0	0	0	0	0	0	0	0	0	0	0	0	0	0	0	0	0	0	0	0	0	0
BoCo 1 (25)	0	0	0	0	0	0	0	0	0	0	0	0	0	0	0	0	0	0	0	0	0	0	0	0	0	0	0	0	0	0	0	0	0	0	0	0	0	0	0	0	0	0	0	0	0	0	0	0	-0.00696511
BoCo 2 (25)	0	0	0	0	0	0	0	0	0	0	0	0	0	0	0	0	0	0	0	0	0	0	0	0	0	0	0	0	0	0	0	0	0	0	0	0	0	0	0	0	0	0	0	0	0	0	0	0	0
[truncated: 6 more columns]

## Sheet: W FDM approximation
		Buckling load of a fixed-free beam
				Hu et al. [ ]
			a = EI/kGAl²=
			0.025	2.06076
			0.05	2.11978
			0.075	2.1772
			0.1	2.23315
			0.125	2.28773
			0.15	2.34103
		W FDM approximation
		Nine-point grid
		a = EI/kGAl²=	0.075						The governing equation
					Determinant =	1.15492e-06
		blk =	0.125
		Coefficient of axial force kN =	-2.06258				2.18748
	W-1	W0	W1	W2	W3	W4	W5	W6	W7	W8	W9	W10	W11
Gov Eq (1)	0.842621	-3.33826	4.99127	-3.33826	0.842621	0	0	0	0	0	0	0	0
Gov Eq (2)	0	0.842621	-3.33826	4.99127	-3.33826	0.842621	0	0	0	0	0	0	0
Gov Eq (3)	0	0	0.842621	-3.33826	4.99127	-3.33826	0.842621	0	0	0	0	0	0
Gov Eq (4)	0	0	0	0.842621	-3.33826	4.99127	-3.33826	0.842621	0	0	0	0	0
Gov Eq (5)	0	0	0	0	0.842621	-3.33826	4.99127	-3.33826	0.842621	0	0	0	0
Gov Eq (6)	0	0	0	0	0	0.842621	-3.33826	4.99127	-3.33826	0.842621	0	0	0
Gov Eq (7)	0	0	0	0	0	0	0.842621	-3.33826	4.99127	-3.33826	0.842621	0	0
Gov Eq (8)	0	0	0	0	0	0	0	0.842621	-3.33826	4.99127	-3.33826	0.842621	0
Gov Eq (9)	0	0	0	0	0	0	0	0	0.842621	-3.33826	4.99127	-3.33826	0.842621
BoCo 1 (1)	0	0	1	0	0	0	0	0	0	0	0	0	0
BoCo 2 (1)	-1.9454	3.39081	0	-3.39081	1.9454	0	0	0	0	0	0	0	0
BoCo 1 (9)	0	0	0	0	0	0	0	0	-1	16	-30	16	-1
BoCo 2 (9)	0	0	0	0	0	0	0	0	0.419968	-0.823822	0	0.823822	-0.419968
			W FDM approximation
			Seventeen-point grid
		a = EI/kGAl²=	0.025						The governing equation
					Determinant =	-7.18294e-05
		blk =	0.0625
		Coefficient of axial force kN =	-2.31817				2.06337
	W-1	W0	W1	W2	W3	W4	W5	W6	W7	W8	W9	W10	W11	W12	W13	W14	W15	W16	W17	W18	W19
Gov Eq (1)	0.941291	-3.75611	5.62964	-3.75611	0.941291	0	0	0	0	0	0	0	0	0	0	0	0	0	0	0	0
Gov Eq (2)	0	0.941291	-3.75611	5.62964	-3.75611	0.941291	0	0	0	0	0	0	0	0	0	0	0	0	0	0	0
Gov Eq (3)	0	0	0.941291	-3.75611	5.62964	-3.75611	0.941291	0	0	0	0	0	0	0	0	0	0	0	0	0	0
Gov Eq (4)	0	0	0	0.941291	-3.75611	5.62964	-3.75611	0.941291	0	0	0	0	0	0	0	0	0	0	0	0	0
Gov Eq (5)	0	0	0	0	0.941291	-3.75611	5.62964	-3.75611	0.941291	0	0	0	0	0	0	0	0	0	0	0	0
Gov Eq (6)	0	0	0	0	0	0.941291	-3.75611	5.62964	-3.75611	0.941291	0	0	0	0	0	0	0	0	0	0	0
Gov Eq (7)	0	0	0	0	0	0	0.941291	-3.75611	5.62964	-3.75611	0.941291	0	0	0	0	0	0	0	0	0	0
Gov Eq (8)	0	0	0	0	0	0	0	0.941291	-3.75611	5.62964	-3.75611	0.941291	0	0	0	0	0	0	0	0	0
Gov Eq (9)	0	0	0	0	0	0	0	0	0.941291	-3.75611	5.62964	-3.75611	0.941291	0	0	0	0	0	0	0	0
Gov Eq (10)	0	0	0	0	0	0	0	0	0	0.941291	-3.75611	5.62964	-3.75611	0.941291	0	0	0	0	0	0	0
Gov Eq (11)	0	0	0	0	0	0	0	0	0	0	0.941291	-3.75611	5.62964	-3.75611	0.941291	0	0	0	0	0	0
Gov Eq (12)	0	0	0	0	0	0	0	0	0	0	0	0.941291	-3.75611	5.62964	-3.75611	0.941291	0	0	0	0	0
Gov Eq (13)	0	0	0	0	0	0	0	0	0	0	0	0	0.941291	-3.75611	5.62964	-3.75611	0.941291	0	0	0	0
Gov Eq (14)	0	0	0	0	0	0	0	0	0	0	0	0	0	0.941291	-3.75611	5.62964	-3.75611	0.941291	0	0	0
Gov Eq (15)	0	0	0	0	0	0	0	0	0	0	0	0	0	0	0.941291	-3.75611	5.62964	-3.75611	0.941291	0	0
Gov Eq (16)	0	0	0	0	0	0	0	0	0	0	0	0	0	0	0	0.941291	-3.75611	5.62964	-3.75611	0.941291	0
Gov Eq (17)	0	0	0	0	0	0	0	0	0	0	0	0	0	0	0	0	0.941291	-3.75611	5.62964	-3.75611	0.941291
BoCo 1 (1)	0	0	1	0	0	0	0	0	0	0	0	0	0	0	0	0	0	0	0	0	0
BoCo 2 (1)	-2.93121	5.36243	0	-5.36243	2.93121	0	0	0	0	0	0	0	0	0	0	0	0	0	0	0	0
BoCo 1 (17)	0	0	0	0	0	0	0	0	0	0	0	0	0	0	0	0	-1	16	-30	16	-1
BoCo 2 (17)	0	0	0	0	0	0	0	0	0	0	0	0	0	0	0	0	0.470268	-0.936009	0	0.936009	-0.470268
		W FDM approximation
		Twenty five-point grid
		a = EI/kGAl²=	0.1						The governing equation
					Determinant =	0.00069149
		blk =	0.0416667
		Coefficient of axial force kN =	-1.97705				2.2343
	W-1	W0	W1	W2	W3	W4	W5	W6	W7	W8	W9	W10	W11	W12	W13	W14	W15	W16	W17	W18	W19	W20	W21	W22	W23	W24	W25	W26	W27
Gov Eq (1)	0.802009	-3.2046	4.80519	-3.2046	0.802009	0	0	0	0	0	0	0	0	0	0	0	0	0	0	0	0	0	0	0	0	0	0	0	0
Gov Eq (2)	0	0.802009	-3.2046	4.80519	-3.2046	0.802009	0	0	0	0	0	0	0	0	0	0	0	0	0	0	0	0	0	0	0	0	0	0	0
Gov Eq (3)	0	0	0.802009	-3.2046	4.80519	-3.2046	0.802009	0	0	0	0	0	0	0	0	0	0	0	0	0	0	0	0	0	0	0	0	0	0
Gov Eq (4)	0	0	0	0.802009	-3.2046	4.80519	-3.2046	0.802009	0	0	0	0	0	0	0	0	0	0	0	0	0	0	0	0	0	0	0	0	0
Gov Eq (5)	0	0	0	0	0.802009	-3.2046	4.80519	-3.2046	0.802009	0	0	0	0	0	0	0	0	0	0	0	0	0	0	0	0	0	0	0	0
Gov Eq (6)	0	0	0	0	0	0.802009	-3.2046	4.80519	-3.2046	0.802009	0	0	0	0	0	0	0	0	0	0	0	0	0	0	0	0	0	0	0
Gov Eq (7)	0	0	0	0	0	0	0.802009	-3.2046	4.80519	-3.2046	0.802009	0	0	0	0	0	0	0	0	0	0	0	0	0	0	0	0	0	0
Gov Eq (8)	0	0	0	0	0	0	0	0.802009	-3.2046	4.80519	-3.2046	0.802009	0	0	0	0	0	0	0	0	0	0	0	0	0	0	0	0	0
Gov Eq (9)	0	0	0	0	0	0	0	0	0.802009	-3.2046	4.80519	-3.2046	0.802009	0	0	0	0	0	0	0	0	0	0	0	0	0	0	0	0
Gov Eq (10)	0	0	0	0	0	0	0	0	0	0.802009	-3.2046	4.80519	-3.2046	0.802009	0	0	0	0	0	0	0	0	0	0	0	0	0	0	0
Gov Eq (11)	0	0	0	0	0	0	0	0	0	0	0.802009	-3.2046	4.80519	-3.2046	0.802009	0	0	0	0	0	0	0	0	0	0	0	0	0	0
Gov Eq (12)	0	0	0	0	0	0	0	0	0	0	0	0.802009	-3.2046	4.80519	-3.2046	0.802009	0	0	0	0	0	0	0	0	0	0	0	0	0
Gov Eq (13)	0	0	0	0	0	0	0	0	0	0	0	0	0.802009	-3.2046	4.80519	-3.2046	0.802009	0	0	0	0	0	0	0	0	0	0	0	0
Gov Eq (14)	0	0	0	0	0	0	0	0	0	0	0	0	0	0.802009	-3.2046	4.80519	-3.2046	0.802009	0	0	0	0	0	0	0	0	0	0	0
Gov Eq (15)	0	0	0	0	0	0	0	0	0	0	0	0	0	0	0.802009	-3.2046	4.80519	-3.2046	0.802009	0	0	0	0	0	0	0	0	0	0
Gov Eq (16)	0	0	0	0	0	0	0	0	0	0	0	0	0	0	0	0.802009	-3.2046	4.80519	-3.2046	0.802009	0	0	0	0	0	0	0	0	0
Gov Eq (17)	0	0	0	0	0	0	0	0	0	0	0	0	0	0	0	0	0.802009	-3.2046	4.80519	-3.2046	0.802009	0	0	0	0	0	0	0	0
Gov Eq (18)	0	0	0	0	0	0	0	0	0	0	0	0	0	0	0	0	0	0.802009	-3.2046	4.80519	-3.2046	0.802009	0	0	0	0	0	0	0
Gov Eq (19)	0	0	0	0	0	0	0	0	0	0	0	0	0	0	0	0	0	0	0.802009	-3.2046	4.80519	-3.2046	0.802009	0	0	0	0	0	0
Gov Eq (20)	0	0	0	0	0	0	0	0	0	0	0	0	0	0	0	0	0	0	0	0.802009	-3.2046	4.80519	-3.2046	0.802009	0	0	0	0	0
Gov Eq (21)	0	0	0	0	0	0	0	0	0	0	0	0	0	0	0	0	0	0	0	0	0.802009	-3.2046	4.80519	-3.2046	0.802009	0	0	0	0
Gov Eq (22)	0	0	0	0	0	0	0	0	0	0	0	0	0	0	0	0	0	0	0	0	0	0.802009	-3.2046	4.80519	-3.2046	0.802009	0	0	0
Gov Eq (23)	0	0	0	0	0	0	0	0	0	0	0	0	0	0	0	0	0	0	0	0	0	0	0.802009	-3.2046	4.80519	-3.2046	0.802009	0	0
Gov Eq (24)	0	0	0	0	0	0	0	0	0	0	0	0	0	0	0	0	0	0	0	0	0	0	0	0.802009	-3.2046	4.80519	-3.2046	0.802009	0
Gov Eq (25)	0	0	0	0	0	0	0	0	0	0	0	0	0	0	0	0	0	0	0	0	0	0	0	0	0.802009	-3.2046	4.80519	-3.2046	0.802009
BoCo 1 (1)	0	0	1	0	0	0	0	0	0	0	0	0	0	0	0	0	0	0	0	0	0	0	0	0	0	0	0	0	0
BoCo 2 (1)	-23.0228	45.5455	0	-45.5455	23.0228	0	0	0	0	0	0	0	0	0	0	0	0	0	0	0	0	0	0	0	0	0	0	0	0
BoCo 1 (17)	0	0	0	0	0	0	0	0	0	0	0	0	0	0	0	0	0	0	0	0	0	0	0	0	-1	16	-30	16	-1
BoCo 2 (17)	0	0	0	0	0	0	0	0	0	0	0	0	0	0	0	0	0	0	0	0	0	0	0	0	0.400861	-0.800006	0	0.800006	-0.400861

## Sheet: M-W FDM approx
		Buckling load of a fixed-free beam
				Hu et al. [ ]
			a = EI/kGAl²=
			0.025	2.06076
			0.05	2.11978
			0.075	2.1772
			0.1	2.23315
			0.125	2.28773
			0.15	2.34103
		M-W FDM approximation
		Nine-point grid
						The governing equation
		a = EI/kGAl²=	0.1
		blk =	0.125		Determinant =	-0.00080283
			-0.0308435			2.23603
	W0	h²M0	W1	h²M1	W2	h²M2	W3	h²M3	W4	h²M4	W5	h²M5	W6	h²M6	W7	h²M7	W8	h²M8	W9	h²M9	W10	h²M10
Gov Eq 1 (1)	-0.0308435	1	0.061687	-2	-0.0308435	1	0	0	0	0	0	0	0	0	0	0	0	0	0	0	0	0
Gov Eq 2 (1)	1	-6.4	-2	13.8	1	-6.4	0	0	0	0	0	0	0	0	0	0	0	0	0	0	0	0
Gov Eq 1 (2)	0	0	-0.0308435	1	0.061687	-2	-0.0308435	1	0	0	0	0	0	0	0	0	0	0	0	0	0	0
Gov Eq 2 (2)	0	0	1	-6.4	-2	13.8	1	-6.4	0	0	0	0	0	0	0	0	0	0	0	0	0	0
Gov Eq 1 (3)	0	0	0	0	-0.0308435	1	0.061687	-2	-0.0308435	1	0	0	0	0	0	0	0	0	0	0	0	0
Gov Eq 2 (3)	0	0	0	0	1	-6.4	-2	13.8	1	-6.4	0	0	0	0	0	0	0	0	0	0	0	0
Gov Eq 1 (4)	0	0	0	0	0	0	-0.0308435	1	0.061687	-2	-0.0308435	1	0	0	0	0	0	0	0	0	0	0
Gov Eq 2 (4)	0	0	0	0	0	0	1	-6.4	-2	13.8	1	-6.4	0	0	0	0	0	0	0	0	0	0
Gov Eq 1 (5)	0	0	0	0	0	0	0	0	-0.0308435	1	0.061687	-2	-0.0308435	1	0	0	0	0	0	0	0	0
Gov Eq 2 (5)	0	0	0	0	0	0	0	0	1	-6.4	-2	13.8	1	-6.4	0	0	0	0	0	0	0	0
Gov Eq 1 (6)	0	0	0	0	0	0	0	0	0	0	-0.0308435	1	0.061687	-2	-0.0308435	1	0	0	0	0	0	0
Gov Eq 2 (6)	0	0	0	0	0	0	0	0	0	0	1	-6.4	-2	13.8	1	-6.4	0	0	0	0	0	0
Gov Eq 1 (7)	0	0	0	0	0	0	0	0	0	0	0	0	-0.0308435	1	0.061687	-2	-0.0308435	1	0	0	0	0
Gov Eq 2 (7)	0	0	0	0	0	0	0	0	0	0	0	0	1	-6.4	-2	13.8	1	-6.4	0	0	0	0
Gov Eq 1 (8)	0	0	0	0	0	0	0	0	0	0	0	0	0	0	-0.0308435	1	0.061687	-2	-0.0308435	1	0	0
Gov Eq 2 (8)	0	0	0	0	0	0	0	0	0	0	0	0	0	0	1	-6.4	-2	13.8	1	-6.4	0	0
Gov Eq 1 (9)	0	0	0	0	0	0	0	0	0	0	0	0	0	0	0	0	-0.0308435	1	0.061687	-2	-0.0308435	1
Gov Eq 2 (9)	0	0	0	0	0	0	0	0	0	0	0	0	0	0	0	0	1	-6.4	-2	13.8	1	-6.4
Bo Co 1 (1)	0	0	1	0	0	0	0	0	0	0	0	0	0	0	0	0	0	0	0	0	0	0
Bo Co 2 (1)	-1	6.4	0	0	1	-6.4	0	0	0	0	0	0	0	0	0	0	0	0	0	0	0	0
Bo Co 1 (9)	0	0	0	0	0	0	0	0	0	0	0	0	0	0	0	0	0.0308435	-1	0	0	-0.0308435	1
Bo Co 2 (9)	0	0	0	0	0	0	0	0	0	0	0	0	0	0	0	0	0	0	0	1	0	0
		M-W FDM approximation
		Seventeen-point grid
						The governing equation
		a = EI/kGAl²=	0.1
		blk =	0.0625		Determinant =	-7.12231e-06
			-0.00772581			2.23387
	W0	h²M0	W1	h²M1	W2	h²M2	W3	h²M3	W4	h²M4	W5	h²M5	W6	h²M6	W7	h²M7	W8	h²M8	W9	h²M9	W10	h²M10	W11	h²M11	W12	h²M12	W13	h²M13	W14	h²M14	W15	h²M15	W16	h²M16	W17	h²M17	W18	h²M18
Gov Eq 1 (1)	-0.00772581	1	0.0154516	-2	-0.00772581	1	0	0	0	0	0	0	0	0	0	0	0	0	0	0	0	0	0	0	0	0	0	0	0	0	0	0	0	0	0	0	0	0		0
Gov Eq 2 (1)	1	-25.6	-2	52.2	1	-25.6	0	0	0	0	0	0	0	0	0	0	0	0	0	0	0	0	0	0	0	0	0	0	0	0	0	0	0	0	0	0	0	0		0
Gov Eq 1 (2)	0	0	-0.00772581	1	0.0154516	-2	-0.00772581	1	0	0	0	0	0	0	0	0	0	0	0	0	0	0	0	0	0	0	0	0	0	0	0	0	0	0	0	0	0	0		0
Gov Eq 2 (2)	0	0	1	-25.6	-2	52.2	1	-25.6	0	0	0	0	0	0	0	0	0	0	0	0	0	0	0	0	0	0	0	0	0	0	0	0	0	0	0	0	0	0		0
Gov Eq 1 (3)	0	0	0	0	-0.00772581	1	0.0154516	-2	-0.00772581	1	0	0	0	0	0	0	0	0	0	0	0	0	0	0	0	0	0	0	0	0	0	0	0	0	0	0	0	0		0
Gov Eq 2 (3)	0	0	0	0	1	-25.6	-2	52.2	1	-25.6	0	0	0	0	0	0	0	0	0	0	0	0	0	0	0	0	0	0	0	0	0	0	0	0	0	0	0	0		0
Gov Eq 1 (4)	0	0	0	0	0	0	-0.00772581	1	0.0154516	-2	-0.00772581	1	0	0	0	0	0	0	0	0	0	0	0	0	0	0	0	0	0	0	0	0	0	0	0	0	0	0		0
Gov Eq 2 (4)	0	0	0	0	0	0	1	-25.6	-2	52.2	1	-25.6	0	0	0	0	0	0	0	0	0	0	0	0	0	0	0	0	0	0	0	0	0	0	0	0	0	0		0
Gov Eq 1 (5)	0	0	0	0	0	0	0	0	-0.00772581	1	0.0154516	-2	-0.00772581	1	0	0	0	0	0	0	0	0	0	0	0	0	0	0	0	0	0	0	0	0	0	0	0	0		0
Gov Eq 2 (5)	0	0	0	0	0	0	0	0	1	-25.6	-2	52.2	1	-25.6	0	0	0	0	0	0	0	0	0	0	0	0	0	0	0	0	0	0	0	0	0	0	0	0		0
Gov Eq 1 (6)	0	0	0	0	0	0	0	0	0	0	-0.00772581	1	0.0154516	-2	-0.00772581	1	0	0	0	0	0	0	0	0	0	0	0	0	0	0	0	0	0	0	0	0	0	0		0
Gov Eq 2 (6)	0	0	0	0	0	0	0	0	0	0	1	-25.6	-2	52.2	1	-25.6	0	0	0	0	0	0	0	0	0	0	0	0	0	0	0	0	0	0	0	0	0	0		0
Gov Eq 1 (7)	0	0	0	0	0	0	0	0	0	0	0	0	-0.00772581	1	0.0154516	-2	-0.00772581	1	0	0	0	0	0	0	0	0	0	0	0	0	0	0	0	0	0	0	0	0		0
Gov Eq 2 (7)	0	0	0	0	0	0	0	0	0	0	0	0	1	-25.6	-2	52.2	1	-25.6	0	0	0	0	0	0	0	0	0	0	0	0	0	0	0	0	0	0	0	0		0
Gov Eq 1 (8)	0	0	0	0	0	0	0	0	0	0	0	0	0	0	-0.00772581	1	0.0154516	-2	-0.00772581	1	0	0	0	0	0	0	0	0	0	0	0	0	0	0	0	0	0	0		0
Gov Eq 2 (8)	0	0	0	0	0	0	0	0	0	0	0	0	0	0	1	-25.6	-2	52.2	1	-25.6	0	0	0	0	0	0	0	0	0	0	0	0	0	0	0	0	0	0		0
Gov Eq 1 (9)	0	0	0	0	0	0	0	0	0	0	0	0	0	0	0	0	-0.00772581	1	0.0154516	-2	-0.00772581	1	0	0	0	0	0	0	0	0	0	0	0	0	0	0	0	0		0
Gov Eq 2 (9)	0	0	0	0	0	0	0	0	0	0	0	0	0	0	0	0	1	-25.6	-2	52.2	1	-25.6	0	0	0	0	0	0	0	0	0	0	0	0	0	0	0	0		0
Gov Eq 1 (10)	0	0	0	0	0	0	0	0	0	0	0	0	0	0	0	0	0	0	-0.00772581	1	0.0154516	-2	-0.00772581	1	0	0	0	0	0	0	0	0	0	0	0	0	0	0		0
Gov Eq 2 (10)	0	0	0	0	0	0	0	0	0	0	0	0	0	0	0	0	0	0	1	-25.6	-2	52.2	1	-25.6	0	0	0	0	0	0	0	0	0	0	0	0	0	0		0
Gov Eq 1 (11)	0	0	0	0	0	0	0	0	0	0	0	0	0	0	0	0	0	0	0	0	-0.00772581	1	0.0154516	-2	-0.00772581	1	0	0	0	0	0	0	0	0	0	0	0	0		0
Gov Eq 2 (11)	0	0	0	0	0	0	0	0	0	0	0	0	0	0	0	0	0	0	0	0	1	-25.6	-2	52.2	1	-25.6	0	0	0	0	0	0	0	0	0	0	0	0		0
Gov Eq 1 (12)	0	0	0	0	0	0	0	0	0	0	0	0	0	0	0	0	0	0	0	0	0	0	-0.00772581	1	0.0154516	-2	-0.00772581	1	0	0	0	0	0	0	0	0	0	0		0
Gov Eq 2 (12)	0	0	0	0	0	0	0	0	0	0	0	0	0	0	0	0	0	0	0	0	0	0	1	-25.6	-2	52.2	1	-25.6	0	0	0	0	0	0	0	0	0	0		0
Gov Eq 1 (13)	0	0	0	0	0	0	0	0	0	0	0	0	0	0	0	0	0	0	0	0	0	0	0	0	-0.00772581	1	0.0154516	-2	-0.00772581	1	0	0	0	0	0	0	0	0		0
Gov Eq 2 (13)	0	0	0	0	0	0	0	0	0	0	0	0	0	0	0	0	0	0	0	0	0	0	0	0	1	-25.6	-2	52.2	1	-25.6	0	0	0	0	0	0	0	0		0
Gov Eq 1 (14)	0	0	0	0	0	0	0	0	0	0	0	0	0	0	0	0	0	0	0	0	0	0	0	0	0	0	-0.00772581	1	0.0154516	-2	-0.00772581	1	0	0	0	0	0	0		0
Gov Eq 2 (14)	0	0	0	0	0	0	0	0	0	0	0	0	0	0	0	0	0	0	0	0	0	0	0	0	0	0	1	-25.6	-2	52.2	1	-25.6	0	0	0	0	0	0		0
Gov Eq 1 (15)	0	0	0	0	0	0	0	0	0	0	0	0	0	0	0	0	0	0	0	0	0	0	0	0	0	0	0	0	-0.00772581	1	0.0154516	-2	-0.00772581	1	0	0	0	0		0
Gov Eq 2 (15)	0	0	0	0	0	0	0	0	0	0	0	0	0	0	0	0	0	0	0	0	0	0	0	0	0	0	0	0	1	-25.6	-2	52.2	1	-25.6	0	0	0	0		0
Gov Eq 1 (16)	0	0	0	0	0	0	0	0	0	0	0	0	0	0	0	0	0	0	0	0	0	0	0	0	0	0	0	0	0	0	-0.00772581	1	0.0154516	-2	-0.00772581	1	0	0		0
Gov Eq 2 (16)	0	0	0	0	0	0	0	0	0	0	0	0	0	0	0	0	0	0	0	0	0	0	0	0	0	0	0	0	0	0	1	-25.6	-2	52.2	1	-25.6	0	0		0
Gov Eq 1 (17)	0	0	0	0	0	0	0	0	0	0	0	0	0	0	0	0	0	0	0	0	0	0	0	0	0	0	0	0	0	0	0	0	-0.00772581	1	0.0154516	-2	-0.00772581	1		0
Gov Eq 2 (17)	0	0	0	0	0	0	0	0	0	0	0	0	0	0	0	0	0	0	0	0	0	0	0	0	0	0	0	0	0	0	0	0	1	-25.6	-2	52.2	1	-25.6		0
Bo Co 1 (1)	0	0	1	0	0	0	0	0	0	0	0	0	0	0	0	0	0	0	0	0	0	0	0	0	0	0	0	0	0	0	0	0	0	0	0	0	0	0		0
Bo Co 2 (1)	-1	25.6	0	0	1	-25.6	0	0	0	0	0	0	0	0	0	0	0	0	0	0	0	0	0	0	0	0	0	0	0	0	0	0	0	0	0	0	0	0		0
Bo Co 1 (17)	0	0	0	0	0	0	0	0	0	0	0	0	0	0	0	0	0	0	0	0	0	0	0	0	0	0	0	0	0	0	0	0	0	0	0	1	0	0		0
Bo Co 2 (17)	0	0	0	0	0	0	0	0	0	0	0	0	0	0	0	0	0	0	0	0	0	0	0	0	0	0	0	0	0	0	0	0	0.00772581	-1	0	0	-0.00772581	1		0
		M-W FDM approximation
		Twenty five-point grid
						The governing equation
		a = EI/kGAl²=	0.1
		blk =	0.0416667		Determinant =	1.18767e-05
			-0.00343492			2.23347
	W0	h²M0	W1	h²M1	W2	h²M2	W3	h²M3	W4	h²M4	W5	h²M5	W6	h²M6	W7	h²M7	W8	h²M8	W9	h²M9	W10	h²M10	W11	h²M11	W12	h²M12	W13	h²M13	W14	h²M14	W15	h²M15	W16	h²M16	W17	h²M17	W18	h²M18	W19	h²M19	W20	h²M20	W21	h²M21	W22	h²M22	W23	h²M23	W24
Gov Eq 1 (1)	-0.00343492	1	0.00686985	-2	-0.00343492	1	0	0	0	0	0	0	0	0	0	0	0	0	0	0	0	0	0	0	0	0	0	0	0	0	0	0	0	0	0	0	0	0	0	0	0	0	0	0	0	0	0	0	0
Gov Eq 2 (1)	1	-57.6	-2	116.2	1	-57.6	0	0	0	0	0	0	0	0	0	0	0	0	0	0	0	0	0	0	0	0	0	0	0	0	0	0	0	0	0	0	0	0	0	0	0	0	0	0	0	0	0	0	0
Gov Eq 1 (2)	0	0	-0.00343492	1	0.00686985	-2	-0.00343492	1	0	0	0	0	0	0	0	0	0	0	0	0	0	0	0	0	0	0	0	0	0	0	0	0	0	0	0	0	0	0	0	0	0	0	0	0	0	0	0	0	0
Gov Eq 2 (2)	0	0	1	-57.6	-2	116.2	1	-57.6	0	0	0	0	0	0	0	0	0	0	0	0	0	0	0	0	0	0	0	0	0	0	0	0	0	0	0	0	0	0	0	0	0	0	0	0	0	0	0	0	0
Gov Eq 1 (3)	0	0	0	0	-0.00343492	1	0.00686985	-2	-0.00343492	1	0	0	0	0	0	0	0	0	0	0	0	0	0	0	0	0	0	0	0	0	0	0	0	0	0	0	0	0	0	0	0	0	0	0	0	0	0	0	0
Gov Eq 2 (3)	0	0	0	0	1	-57.6	-2	116.2	1	-57.6	0	0	0	0	0	0	0	0	0	0	0	0	0	0	0	0	0	0	0	0	0	0	0	0	0	0	0	0	0	0	0	0	0	0	0	0	0	0	0
Gov Eq 1 (4)	0	0	0	0	0	0	-0.00343492	1	0.00686985	-2	-0.00343492	1	0	0	0	0	0	0	0	0	0	0	0	0	0	0	0	0	0	0	0	0	0	0	0	0	0	0	0	0	0	0	0	0	0	0	0	0	0
Gov Eq 2 (4)	0	0	0	0	0	0	1	-57.6	-2	116.2	1	-57.6	0	0	0	0	0	0	0	0	0	0	0	0	0	0	0	0	0	0	0	0	0	0	0	0	0	0	0	0	0	0	0	0	0	0	0	0	0
Gov Eq 1 (5)	0	0	0	0	0	0	0	0	-0.00343492	1	0.00686985	-2	-0.00343492	1	0	0	0	0	0	0	0	0	0	0	0	0	0	0	0	0	0	0	0	0	0	0	0	0	0	0	0	0	0	0	0	0	0	0	0
Gov Eq 2 (5)	0	0	0	0	0	0	0	0	1	-57.6	-2	116.2	1	-57.6	0	0	0	0	0	0	0	0	0	0	0	0	0	0	0	0	0	0	0	0	0	0	0	0	0	0	0	0	0	0	0	0	0	0	0
Gov Eq 1 (6)	0	0	0	0	0	0	0	0	0	0	-0.00343492	1	0.00686985	-2	-0.00343492	1	0	0	0	0	0	0	0	0	0	0	0	0	0	0	0	0	0	0	0	0	0	0	0	0	0	0	0	0	0	0	0	0	0
Gov Eq 2 (6)	0	0	0	0	0	0	0	0	0	0	1	-57.6	-2	116.2	1	-57.6	0	0	0	0	0	0	0	0	0	0	0	0	0	0	0	0	0	0	0	0	0	0	0	0	0	0	0	0	0	0	0	0	0
Gov Eq 1 (7)	0	0	0	0	0	0	0	0	0	0	0	0	-0.00343492	1	0.00686985	-2	-0.00343492	1	0	0	0	0	0	0	0	0	0	0	0	0	0	0	0	0	0	0	0	0	0	0	0	0	0	0	0	0	0	0	0
Gov Eq 2 (7)	0	0	0	0	0	0	0	0	0	0	0	0	1	-57.6	-2	116.2	1	-57.6	0	0	0	0	0	0	0	0	0	0	0	0	0	0	0	0	0	0	0	0	0	0	0	0	0	0	0	0	0	0	0
Gov Eq 1 (8)	0	0	0	0	0	0	0	0	0	0	0	0	0	0	-0.00343492	1	0.00686985	-2	-0.00343492	1	0	0	0	0	0	0	0	0	0	0	0	0	0	0	0	0	0	0	0	0	0	0	0	0	0	0	0	0	0
Gov Eq 2 (8)	0	0	0	0	0	0	0	0	0	0	0	0	0	0	1	-57.6	-2	116.2	1	-57.6	0	0	0	0	0	0	0	0	0	0	0	0	0	0	0	0	0	0	0	0	0	0	0	0	0	0	0	0	0
Gov Eq 1 (9)	0	0	0	0	0	0	0	0	0	0	0	0	0	0	0	0	-0.00343492	1	0.00686985	-2	-0.00343492	1	0	0	0	0	0	0	0	0	0	0	0	0	0	0	0	0	0	0	0	0	0	0	0	0	0	0	0
Gov Eq 2 (9)	0	0	0	0	0	0	0	0	0	0	0	0	0	0	0	0	1	-57.6	-2	116.2	1	-57.6	0	0	0	0	0	0	0	0	0	0	0	0	0	0	0	0	0	0	0	0	0	0	0	0	0	0	0
Gov Eq 1 (10)	0	0	0	0	0	0	0	0	0	0	0	0	0	0	0	0	0	0	-0.00343492	1	0.00686985	-2	-0.00343492	1	0	0	0	0	0	0	0	0	0	0	0	0	0	0	0	0	0	0	0	0	0	0	0	0	0
Gov Eq 2 (10)	0	0	0	0	0	0	0	0	0	0	0	0	0	0	0	0	0	0	1	-57.6	-2	116.2	1	-57.6	0	0	0	0	0	0	0	0	0	0	0	0	0	0	0	0	0	0	0	0	0	0	0	0	0
Gov Eq 1 (11)	0	0	0	0	0	0	0	0	0	0	0	0	0	0	0	0	0	0	0	0	-0.00343492	1	0.00686985	-2	-0.00343492	1	0	0	0	0	0	0	0	0	0	0	0	0	0	0	0	0	0	0	0	0	0	0	0
Gov Eq 2 (11)	0	0	0	0	0	0	0	0	0	0	0	0	0	0	0	0	0	0	0	0	1	-57.6	-2	116.2	1	-57.6	0	0	0	0	0	0	0	0	0	0	0	0	0	0	0	0	0	0	0	0	0	0	0
Gov Eq 1 (12)	0	0	0	0	0	0	0	0	0	0	0	0	0	0	0	0	0	0	0	0	0	0	-0.00343492	1	0.00686985	-2	-0.00343492	1	0	0	0	0	0	0	0	0	0	0	0	0	0	0	0	0	0	0	0	0	0
Gov Eq 2 (12)	0	0	0	0	0	0	0	0	0	0	0	0	0	0	0	0	0	0	0	0	0	0	1	-57.6	-2	116.2	1	-57.6	0	0	0	0	0	0	0	0	0	0	0	0	0	0	0	0	0	0	0	0	0
Gov Eq 1 (13)	0	0	0	0	0	0	0	0	0	0	0	0	0	0	0	0	0	0	0	0	0	0	0	0	-0.00343492	1	0.00686985	-2	-0.00343492	1	0	0	0	0	0	0	0	0	0	0	0	0	0	0	0	0	0	0	0
Gov Eq 2 (13)	0	0	0	0	0	0	0	0	0	0	0	0	0	0	0	0	0	0	0	0	0	0	0	0	1	-57.6	-2	116.2	1	-57.6	0	0	0	0	0	0	0	0	0	0	0	0	0	0	0	0	0	0	0
Gov Eq 1 (14)	0	0	0	0	0	0	0	0	0	0	0	0	0	0	0	0	0	0	0	0	0	0	0	0	0	0	-0.00343492	1	0.00686985	-2	-0.00343492	1	0	0	0	0	0	0	0	0	0	0	0	0	0	0	0	0	0
Gov Eq 2 (14)	0	0	0	0	0	0	0	0	0	0	0	0	0	0	0	0	0	0	0	0	0	0	0	0	0	0	1	-57.6	-2	116.2	1	-57.6	0	0	0	0	0	0	0	0	0	0	0	0	0	0	0	0	0
Gov Eq 1 (15)	0	0	0	0	0	0	0	0	0	0	0	0	0	0	0	0	0	0	0	0	0	0	0	0	0	0	0	0	-0.00343492	1	0.00686985	-2	-0.00343492	1	0	0	0	0	0	0	0	0	0	0	0	0	0	0	0
Gov Eq 2 (15)	0	0	0	0	0	0	0	0	0	0	0	0	0	0	0	0	0	0	0	0	0	0	0	0	0	0	0	0	1	-57.6	-2	116.2	1	-57.6	0	0	0	0	0	0	0	0	0	0	0	0	0	0	0
Gov Eq 1 (16)	0	0	0	0	0	0	0	0	0	0	0	0	0	0	0	0	0	0	0	0	0	0	0	0	0	0	0	0	0	0	-0.00343492	1	0.00686985	-2	-0.00343492	1	0	0	0	0	0	0	0	0	0	0	0	0	0
Gov Eq 2 (16)	0	0	0	0	0	0	0	0	0	0	0	0	0	0	0	0	0	0	0	0	0	0	0	0	0	0	0	0	0	0	1	-57.6	-2	116.2	1	-57.6	0	0	0	0	0	0	0	0	0	0	0	0	0
Gov Eq 1 (17)	0	0	0	0	0	0	0	0	0	0	0	0	0	0	0	0	0	0	0	0	0	0	0	0	0	0	0	0	0	0	0	0	-0.00343492	1	0.00686985	-2	-0.00343492	1	0	0	0	0	0	0	0	0	0	0	0
Gov Eq 2 (17)	0	0	0	0	0	0	0	0	0	0	0	0	0	0	0	0	0	0	0	0	0	0	0	0	0	0	0	0	0	0	0	0	1	-57.6	-2	116.2	1	-57.6	0	0	0	0	0	0	0	0	0	0	0
Gov Eq 1 (18)	0	0	0	0	0	0	0	0	0	0	0	0	0	0	0	0	0	0	0	0	0	0	0	0	0	0	0	0	0	0	0	0	0	0	-0.00343492	1	0.00686985	-2	-0.00343492	1	0	0	0	0	0	0	0	0	0
Gov Eq 2 (18)	0	0	0	0	0	0	0	0	0	0	0	0	0	0	0	0	0	0	0	0	0	0	0	0	0	0	0	0	0	0	0	0	0	0	1	-57.6	-2	116.2	1	-57.6	0	0	0	0	0	0	0	0	0
Gov Eq 1 (19)	0	0	0	0	0	0	0	0	0	0	0	0	0	0	0	0	0	0	0	0	0	0	0	0	0	0	0	0	0	0	0	0	0	0	0	0	-0.00343492	1	0.00686985	-2	-0.00343492	1	0	0	0	0	0	0	0
Gov Eq 2 (19)	0	0	0	0	0	0	0	0	0	0	0	0	0	0	0	0	0	0	0	0	0	0	0	0	0	0	0	0	0	0	0	0	0	0	0	0	1	-57.6	-2	116.2	1	-57.6	0	0	0	0	0	0	0
Gov Eq 1 (20)	0	0	0	0	0	0	0	0	0	0	0	0	0	0	0	0	0	0	0	0	0	0	0	0	0	0	0	0	0	0	0	0	0	0	0	0	0	0	-0.00343492	1	0.00686985	-2	-0.00343492	1	0	0	0	0	0
Gov Eq 2 (20)	0	0	0	0	0	0	0	0	0	0	0	0	0	0	0	0	0	0	0	0	0	0	0	0	0	0	0	0	0	0	0	0	0	0	0	0	0	0	1	-57.6	-2	116.2	1	-57.6	0	0	0	0	0
Gov Eq 1 (21)	0	0	0	0	0	0	0	0	0	0	0	0	0	0	0	0	0	0	0	0	0	0	0	0	0	0	0	0	0	0	0	0	0	0	0	0	0	0	0	0	-0.00343492	1	0.00686985	-2	-0.00343492	1	0	0	0
Gov Eq 2 (21)	0	0	0	0	0	0	0	0	0	0	0	0	0	0	0	0	0	0	0	0	0	0	0	0	0	0	0	0	0	0	0	0	0	0	0	0	0	0	0	0	1	-57.6	-2	116.2	1	-57.6	0	0	0
Gov Eq 1 (22)	0	0	0	0	0	0	0	0	0	0	0	0	0	0	0	0	0	0	0	0	0	0	0	0	0	0	0	0	0	0	0	0	0	0	0	0	0	0	0	0	0	0	-0.00343492	1	0.00686985	-2	-0.00343492	1	0
Gov Eq 2 (22)	0	0	0	0	0	0	0	0	0	0	0	0	0	0	0	0	0	0	0	0	0	0	0	0	0	0	0	0	0	0	0	0	0	0	0	0	0	0	0	0	0	0	1	-57.6	-2	116.2	1	-57.6	0
Gov Eq 1 (23)	0	0	0	0	0	0	0	0	0	0	0	0	0	0	0	0	0	0	0	0	0	0	0	0	0	0	0	0	0	0	0	0	0	0	0	0	0	0	0	0	0	0	0	0	-0.00343492	1	0.00686985	-2	-0.00343492
Gov Eq 2 (23)	0	0	0	0	0	0	0	0	0	0	0	0	0	0	0	0	0	0	0	0	0	0	0	0	0	0	0	0	0	0	0	0	0	0	0	0	0	0	0	0	0	0	0	0	1	-57.6	-2	116.2	1
Gov Eq 1 (24)	0	0	0	0	0	0	0	0	0	0	0	0	0	0	0	0	0	0	0	0	0	0	0	0	0	0	0	0	0	0	0	0	0	0	0	0	0	0	0	0	0	0	0	0	0	0	-0.00343492	1	0.00686985
Gov Eq 2 (24)	0	0	0	0	0	0	0	0	0	0	0	0	0	0	0	0	0	0	0	0	0	0	0	0	0	0	0	0	0	0	0	0	0	0	0	0	0	0	0	0	0	0	0	0	0	0	1	-57.6	-2
Gov Eq 1 (25)	0	0	0	0	0	0	0	0	0	0	0	0	0	0	0	0	0	0	0	0	0	0	0	0	0	0	0	0	0	0	0	0	0	0	0	0	0	0	0	0	0	0	0	0	0	0	0	0	-0.00343492
Gov Eq 2 (25)	0	0	0	0	0	0	0	0	0	0	0	0	0	0	0	0	0	0	0	0	0	0	0	0	0	0	0	0	0	0	0	0	0	0	0	0	0	0	0	0	0	0	0	0	0	0	0	0	1
Bo Co 1 (1)	0	0	1	0	0	0	0	0	0	0	0	0	0	0	0	0	0	0	0	0	0	0	0	0	0	0	0	0	0	0	0	0	0	0	0	0	0	0	0	0	0	0	0	0	0	0	0	0	0
Bo Co 2 (1)	-1	57.6	0	0	1	-57.6	0	0	0	0	0	0	0	0	0	0	0	0	0	0	0	0	0	0	0	0	0	0	0	0	0	0	0	0	0	0	0	0	0	0	0	0	0	0	0	0	0	0	0
Bo Co 1 (25)	0	0	0	0	0	0	0	0	0	0	0	0	0	0	0	0	0	0	0	0	0	0	0	0	0	0	0	0	0	0	0	0	0	0	0	0	0	0	0	0	0	0	0	0	0	0	0	0	0
Bo Co 2 (25)	0	0	0	0	0	0	0	0	0	0	0	0	0	0	0	0	0	0	0	0	0	0	0	0	0	0	0	0	0	0	0	0	0	0	0	0	0	0	0	0	0	0	0	0	0	0	0	0	0.00343492
[truncated: 5 more columns]
