# Supplementary material for: Timoshenko Beam Theory:First-Order Analysis, Second-Order Analysis, Stability, and Vibration Analysis Using the Finite Difference Method
Source: Preprints.org preprint supplement (doi:10.20944/preprints202105.0252.v1), 2021-05-11
Supplement: Supplementary file 2 [file Fixed pinned beam subjected to a concentrated load.xlsx]

## Sheet: FP beam unif distr load
		Uniform fixed-pinned beam under uniformly distributed load
				Classical Beam Theory
		x[m]	Moment
	Position 1	0	-80	kNm
	Position 2	2	0	kNm
	Position 3	4	40	kNm
	Position 4	6	40	kNm
	Position 5	8	0	kNm
				Present study
										The governing equations
	The boundary conditions:
		Point 1:	deflection is zero		w = 0 ®
			Slope is zero
		Point 5:	deflection is zero		w = 0 ®
			Bending moment is zero
	W-1	W0	W1	W2	W3	W4	W5	W6	W7
Gov Eq (1)	1	-4	6	-4	1	0	0	0	0		160
Gov Eq (2)	0	1	-4	6	-4	1	0	0	0		160
Gov Eq (3)	0	0	1	-4	6	-4	1	0	0		160
Gov Eq (4)	0	0	0	1	-4	6	-4	1	0		160
Gov Eq (5)	0	0	0	0	1	-4	6	-4	1		160
Bo Co 1 (1)	0	0	1	0	0	0	0	0	0		0
Bo Co 2 (1)	1	-8	0	8	-1	0	0	0	0		0
Bo Co 1 (5)	0	0	0	0	0	0	1	0	0		0
Bo Co 2 (5)	0	0	0	0	1	-16	30	-16	1		0
		W-1	1280
		W0	233.333
		W1	-1.93784e-14
		W2	100
		W3	213.333
		W4	180
		W5	-1.64609e-14
		W6	-166.667
		W7	0
	Calculation of the bending moments
		x[m]	Moment
	Position 1	0	-80	kNm
	Position 2	2	-9.4739e-15	kNm
	Position 3	4	40	kNm
	Position 4	6	40	kNm
	Position 5	8	9.4739e-15	kNm
				Present study (TPS)
	W-1	W0	W1	W2	W3	W4	W5	W6	W7
Gov Eq (1)	1	-4	6	-4	1	0	0	0	0		160
Gov Eq (2)	0	1	-4	6	-4	1	0	0	0		160
Gov Eq (3)	0	0	1	-4	6	-4	1	0	0		160
Gov Eq (4)	0	0	0	1	-4	6	-4	1	0		160
Gov Eq (5)	0	0	0	0	1	-4	6	-4	1		160
Bo Co 1 (1)	0	0	1	0	0	0	0	0	0		0
Bo Co 2 (1)	0	-1	0	1	0	0	0	0	0		0
Bo Co 1 (5)	0	0	0	0	0	0	1	0	0		0
Bo Co 2 (5)	0	0	0	0	0	1	-2	1	0		0
		W-1	1054.55
		W0	145.455
		W1	-2.55351e-14
		W2	145.455
		W3	269.091
		W4	218.182
		W5	-9.16829e-15
		W6	-218.182
		W7	-109.091
	Calculation of the bending moments
			Moment
	Position 1		-72.7273	kNm
	Position 2		5.45455	kNm
	Position 3		43.6364	kNm
	Position 4		41.8182	kNm
	Position 5		-1.42109e-14	kNm

## Sheet: w-fi DFM approximation
		Uniform fixed-pinned beam under concentrated load
			Classical Beam Theory
		P =	10	kN
		a =	5	m
		b =	3	m
		l =	8	m
		a = EI/kGAl²=	0.02
		Moment at fixed end M1 =	-12.161	kNm
		x[m]	M0(x)	m(x)	M(x)
	Position 1	0	0	1	-12.161	kNm
	Position 2	1.25	4.6875	0.84375	-5.57332	kNm
	Position 3	2.5	9.375	0.6875	1.01434	kNm
	Position 4	3.75	14.0625	0.53125	7.60199	kNm
	Position 5	5	18.75	0.375	14.1896	kNm
	Position 6	6	12.5	0.25	9.45976
	Position 7	7	6.25	0.125	4.72988
	Position 8	8	0	0	0
	W-F FDM approximation
		Eight-point grid
	number of grid points	n=	8
	P =	10	kN
	h1 =	1.25	m	bl1=	0.15625
	h2 =	1	m	bl2=	0.125
	a = EI/kGAl²=	0.02
		W0	hkF0	W1	hkF1	W2	hkF2	W3	hkF3	W4	hkF4	W5l	hkF5l	W5a	hkF5a	W5d	hkF5d	W5r	hkF5r	W6	hkF6	W7	hkF7	W8	hkF8	W9	hkF9
	Gov Eq 1 (1)	1	0.5	-2	0	1	-0.5	0	0	0	0	0	0	0	0	0	0	0	0	0	0	0	0	0	0	0	0		0
	Gov Eq 2 (1)	-0.610352	1	0	-3.2207	0.610352	1	0	0	0	0	0	0	0	0	0	0	0	0	0	0	0	0	0	0	0	0		0
	Gov Eq 1 (2)	0	0	1	0.5	-2	0	1	-0.5	0	0	0	0	0	0	0	0	0	0	0	0	0	0	0	0	0	0		0
	Gov Eq 2 (2)	0	0	-0.610352	1	0	-3.2207	0.610352	1	0	0	0	0	0	0	0	0	0	0	0	0	0	0	0	0	0	0		0
	Gov Eq 1 (3)	0	0	0	0	1	0.5	-2	0	1	-0.5	0	0	0	0	0	0	0	0	0	0	0	0	0	0	0	0		0
	Gov Eq 2 (3)	0	0	0	0	-0.610352	1	0	-3.2207	0.610352	1	0	0	0	0	0	0	0	0	0	0	0	0	0	0	0	0		0
	Gov Eq 1 (4)	0	0	0	0	0	0	1	0.5	-2	0	1	-0.5	0	0	0	0	0	0	0	0	0	0	0	0	0	0		0
	Gov Eq 2 (4)	0	0	0	0	0	0	-0.610352	1	0	-3.2207	0.610352	1	0	0	0	0	0	0	0	0	0	0	0	0	0	0		0
	Gov Eq 1 (5l)	0	0	0	0	0	0	0	0	1	0.5	-2	0	1	-0.5	0	0	0	0	0	0	0	0	0	0	0	0		0
	Gov Eq 2 (5l)	0	0	0	0	0	0	0	0	-0.610352	1	0	-3.2207	0.610352	1	0	0	0	0	0	0	0	0	0	0	0	0		0
	Gov Eq 1 (5r)	0	0	0	0	0	0	0	0	0	0	0	0	0	0	1	0.5	-2	0	1	-0.5	0	0	0	0	0	0		0
	Gov Eq 2 (5r)	0	0	0	0	0	0	0	0	0	0	0	0	0	0	-0.390625	1	0	-2.78125	0.390625	1	0	0	0	0	0	0		0
	Gov Eq 1 (6)	0	0	0	0	0	0	0	0	0	0	0	0	0	0	0	0	1	0.5	-2	0	1	-0.5	0	0	0	0		0
	Gov Eq 2 (6)	0	0	0	0	0	0	0	0	0	0	0	0	0	0	0	0	-0.390625	1	0	-2.78125	0.390625	1	0	0	0	0		0
	Gov Eq 1 (7)	0	0	0	0	0	0	0	0	0	0	0	0	0	0	0	0	0	0	1	0.5	-2	0	1	-0.5	0	0		0
	Gov Eq 2 (7)	0	0	0	0	0	0	0	0	0	0	0	0	0	0	0	0	0	0	-0.390625	1	0	-2.78125	0.390625	1	0	0		0
	Gov Eq 1 (8)	0	0	0	0	0	0	0	0	0	0	0	0	0	0	0	0	0	0	0	0	1	0.5	-2	0	1	-0.5		0
	Gov Eq 2 (8)	0	0	0	0	0	0	0	0	0	0	0	0	0	0	0	0	0	0	0	0	-0.390625	1	0	-2.78125	0.390625	1		0
	Bo Co 1 (1)	0	0	1	0	0	0	0	0	0	0	0	0	0	0	0	0	0	0	0	0	0	0	0	0	0	0		0
	Bo Co 2 (1)	0	0	0	1	0	0	0	0	0	0	0	0	0	0	0	0	0	0	0	0	0	0	0	0	0	0		0
	Bo Co 1 (8)	0	0	0	0	0	0	0	0	0	0	0	0	0	0	0	0	0	0	0	0	0	0	1	0	0	0		0
	Bo Co 2 (8)	0	0	0	0	0	0	0	0	0	0	0	0	0	0	0	0	0	0	0	0	0	1	0	0	0	-1		0
	Co Co 1 (5)	0	0	0	0	0	0	0	0	0	0	1	0	0	0	0	0	-1	0	0	0	0	0	0	0	0	0		0
	Co Co 2 (5)	0	0	0	0	0	0	0	0	0	0	0	0.8	0	0	0	0	0	-1	0	0	0	0	0	0	0	0		0
	Co Co 3 (5)	0	0	0	0	0	0	0	0	0	0.32	0	0	0	-0.32	0	-0.5	0	0	0	0.5	0	0	0	0	0	0		0
	Co Co 4 (5)	0	0	0	0	0	0	0	0	-0.3125	0	0	-0.625	0.3125	0	0.390625	0	0	0.78125	-0.390625	0	0	0	0	0	0	0		10
				W0	0.954107			Calculation of the bending moments
				hkF0	-23.8164		Position		FDM	Exact	Difference %
				W1	1.11022e-15		0	M1 =	-11.9641	-12.161	-1.64586
				hkF1	1.19088e-14		1.25	M2 =	-5.40717	-5.57332	-3.07267
				W2	17.7397		2.5	M3 =	1.14971	1.01434	11.7749
				hkF2	13.5713		3.75	M4 =	7.7066	7.60199	1.3574
				W3	43.9282		5	M5 =	14.2635	14.1896	0.5177
				hkF3	16.8974		6	M6 =	9.50899	9.45976	0.5177
				W4	68.3202		7	M7 =	4.75449	4.72988	0.5177
				hkF4	9.97842		8	M8 =	0	0
				W5l	80.6706
				hkF5l	-7.1857
				W5a	70.7344
				hkF5a	-34.595
				W5d	85.3732
				hkF5d	10.8922
				W5r	80.6706
				hkF5r	-5.74856
				W6	61.7046
				hkF6	-17.6348
				W7	33.2295
				hkF7	-24.7665
				W8	4.40984e-15
				hkF8	-27.1438
				W9	-33.2295
				hkF9	-24.7665

## Sheet: M-W FDM approximation
		Uniform fixed-pinned beam under concentrated load
			Classical Beam Theory
		P =	10	kN
		a =	5	m
		b =	3	m
		l =	8	m
		a = EI/kGAl²=	0.02
		Moment at fixed end M1 =	-12.161	kNm
		x[m]	M0(x)	m(x)	M(x)
	Position 1	0	0	1	-12.161	kNm
	Position 2	1.25	4.6875	0.84375	-5.57332	kNm
	Position 3	2.5	9.375	0.6875	1.01434	kNm
	Position 4	3.75	14.0625	0.53125	7.60199	kNm
	Position 5	5	18.75	0.375	14.1896	kNm
	Position 6	6	12.5	0.25	9.45976
	Position 7	7	6.25	0.125	4.72988
	Position 8	8	0	0	0
	M-W FDM approximation
	Eight-point grid
								The governing equations
		P =	10	kN
		Longueur de la poutre l=	8
		h1 =	1.25	m	bl1=	0.15625
		h2 =	1	m	bl2=	0.125
		a = EI/kGAl²=	0.025
	W0	hk2M0	W1	hk2M1	W2	hk2M2	W3	hk2M3	W4	hk2M4	W5l	hk2M5l	W5a	hk2M5a	W5d	hk2M5d	W5r	hk2M5r	W6	hk2M6	W7	hk2M7	W8	hk2M8	W9	hk2M9
Gov Eq 1 (1)	0	1	0	-2	0	1	0	0	0	0	0	0	0	0	0	0	0	0	0	0	0	0	0	0	0	0		0
Gov Eq 2 (1)	1	-1.024	-2	3.048	1	-1.024	0	0	0	0	0	0	0	0	0	0	0	0	0	0	0	0	0	0	0	0		0
Gov Eq 1 (2)	0	0	0	1	0	-2	0	1	0	0	0	0	0	0	0	0	0	0	0	0	0	0	0	0	0	0		0
Gov Eq 2 (2)	0	0	1	-1.024	-2	3.048	1	-1.024	0	0	0	0	0	0	0	0	0	0	0	0	0	0	0	0	0	0		0
Gov Eq 1 (3)	0	0	0	0	0	1	0	-2	0	1	0	0	0	0	0	0	0	0	0	0	0	0	0	0	0	0		0
Gov Eq 2 (3)	0	0	0	0	1	-1.024	-2	3.048	1	-1.024	0	0	0	0	0	0	0	0	0	0	0	0	0	0	0	0		0
Gov Eq 1 (4)	0	0	0	0	0	0	0	1	0	-2	0	1	0	0	0	0	0	0	0	0	0	0	0	0	0	0		0
Gov Eq 2 (4)	0	0	0	0	0	0	1	-1.024	-2	3.048	1	-1.024	0	0	0	0	0	0	0	0	0	0	0	0	0	0		0
Gov Eq 1 (5l)	0	0	0	0	0	0	0	0	0	1	0	-2	0	1	0	0	0	0	0	0	0	0	0	0	0	0		0
Gov Eq 2 (5l)	0	0	0	0	0	0	0	0	1	-1.024	-2	3.048	1	-1.024	0	0	0	0	0	0	0	0	0	0	0	0		0
Gov Eq 1 (5r)	0	0	0	0	0	0	0	0	0	0	0	0	0	0	0	1	0	-2	0	1	0	0	0	0	0	0		0
Gov Eq 2 (5r)	0	0	0	0	0	0	0	0	0	0	0	0	0	0	1	-1.6	-2	4.2	1	-1.6	0	0	0	0	0	0		0
Gov Eq 1 (6)	0	0	0	0	0	0	0	0	0	0	0	0	0	0	0	0	0	1	0	-2	0	1	0	0	0	0		0
Gov Eq 2 (6)	0	0	0	0	0	0	0	0	0	0	0	0	0	0	0	0	1	-1.6	-2	4.2	1	-1.6	0	0	0	0		0
Gov Eq 1 (7)	0	0	0	0	0	0	0	0	0	0	0	0	0	0	0	0	0	0	0	1	0	-2	0	1	0	0		0
Gov Eq 2 (7)	0	0	0	0	0	0	0	0	0	0	0	0	0	0	0	0	0	0	1	-1.6	-2	4.2	1	-1.6	0	0		0
Gov Eq 1 (8)	0	0	0	0	0	0	0	0	0	0	0	0	0	0	0	0	0	0	0	0	0	1	0	-2	0	1		0
Gov Eq 2 (8)	0	0	0	0	0	0	0	0	0	0	0	0	0	0	0	0	0	0	0	0	1	-1.6	-2	4.2	1	-1.6		0
Bo Co 1 (1)	0	0	1	0	0	0	0	0	0	0	0	0	0	0	0	0	0	0	0	0	0	0	0	0	0	0		0
Bo Co 2 (1)	-0.8	0.8192	0	0	0.8	-0.8192	0	0	0	0	0	0	0	0	0	0	0	0	0	0	0	0	0	0	0	0		0
Bo Co 1 (8)	0	0	0	0	0	0	0	0	0	0	0	0	0	0	0	0	0	0	0	0	0	0	1	0	0	0		0
Bo Co 2 (8)	0	0	0	0	0	0	0	0	0	0	0	0	0	0	0	0	0	0	0	0	0	0	0	1	0	0		0
Co Co 1 (5)	0	0	0	0	0	0	0	0	0	0	1	0	0	0	0	0	-1	0	0	0	0	0	0	0	0	0		0
Co Co 2 (5)	0	0	0	0	0	0	0	0	-0.8	0.8192	0	0	0.8	-0.8192	1	-1.6	0	0	-1	1.6	0	0	0	0	0	0		0
Co Co 3 (5)	0	0	0	0	0	0	0	0	0	0	0	0.64	0	0	0	0	0	-1	0	0	0	0	0	0	0	0		0
Co Co 4 (5)	0	0	0	0	0	0	0	0	0	-0.256	0	0	0	0.256	0	0.5	0	0	0	-0.5	0	0	0	0	0	0		10
	Gov Eq 1 (1)	W0	-1.23192			Calculation of the bending moments
	Gov Eq 2 (1)	hk2M0	-28.6403
	Gov Eq 1 (2)	W1	1.38778e-15		Position		FDM	Exact
	Gov Eq 2 (2)	hk2M1	-18.4355		0	M1 =	-11.7987	-12.161
	Gov Eq 1 (3)	W2	19.6674		1.25	M2 =	-5.26769	-5.57332
	Gov Eq 2 (3)	hk2M2	-8.23076		2.5	M3 =	1.26337	1.01434
	Gov Eq 1 (4)	W3	47.5657		3.75	M4 =	7.79442	7.60199
	Gov Eq 2 (4)	hk2M3	1.97401		5	M5l =	14.3255	14.1896
	Gov Eq 1 (5l)	W4	73.4899		5	M5r =	14.3255	14.1896
	Gov Eq 2 (5l)	hk2M4	12.1788		6	M6 =	9.55032	9.45976
	Gov Eq 1 (5r)	W5l	87.2353		7	M7 =	4.77516	4.72988
	Gov Eq 2 (5r)	hk2M5l	22.3836		8	M8 =	5.67002e-16	0
	Gov Eq 1 (6)	W5a	78.5971
	Gov Eq 2 (6)	hk2M5a	32.5883
	Gov Eq 1 (7)	W5d	94.0296
	Gov Eq 2 (7)	hk2M5d	19.1006
	Gov Eq 1 (8)	W5r	87.2353
	Gov Eq 2 (8)	hk2M5r	14.3255
	Bo Co 1 (1)	W6	66.1154
	Bo Co 2 (1)	hk2M6	9.55032
	Bo Co 1 (8)	W7	35.4453
	Bo Co 2 (8)	hk2M7	4.77516
	Co Co 1 (5)	W8	0
	Co Co 2 (5)	hk2M8	5.67002e-16
	Co Co 3 (5)	W9	-35.4453
	Co Co 4 (5)	hk2M9	-4.77516

## Sheet: W FDM approximation
		Uniform fixed-pinned beam under concentrated load
			Classical Beam Theory
		P =	10	kN
		a =	5	m
		b =	3	m
		l =	8	m
		a = EI/kGAl²=	0.02
		Moment at fixed end M1 =	-12.161	kNm
		x[m]	M0(x)	m(x)	M(x)
	Position 1	0	0	1	-12.161	kNm
	Position 2	1.25	4.6875	0.84375	-5.57332	kNm
	Position 3	2.5	9.375	0.6875	1.01434	kNm
	Position 4	3.75	14.0625	0.53125	7.60199	kNm
	Position 5	5	18.75	0.375	14.1896	kNm
	Position 6	6	12.5	0.25	9.45976
	Position 7	7	6.25	0.125	4.72988
	Position 8	8	0	0	0
	W FDM approximation
	Eight-point grid
	number of grid points	n=	8
	P =	10	kN
	h1 =	1.25	m	bl1=	0.15625
	h2 =	1	m	bl2=	0.125
	a = EI/kGAl²=	0.02
		-1	0	1	2	3	4	5l	5a	5b	5c	5d	5r	6	7	8	9	10
	Gov Eq (1)	1	-4	6	-4	1	0	0	0	0	0	0	0	0	0	0	0	0		0
	Gov Eq (2)	0	1	-4	6	-4	1	0	0	0	0	0	0	0	0	0	0	0		0
	Gov Eq (3)	0	0	1	-4	6	-4	1	0	0	0	0	0	0	0	0	0	0		0
	Gov Eq (4)	0	0	0	1	-4	6	-4	1	0	0	0	0	0	0	0	0	0		0
	Gov Eq (5l)	0	0	0	0	1	-4	6	-4	1	0	0	0	0	0	0	0	0		0
	Gov Eq (5r)	0	0	0	0	0	0	0	0	0	1	-4	6	-4	1	0	0	0		0
	Gov Eq (6)	0	0	0	0	0	0	0	0	0	0	1	-4	6	-4	1	0	0		0
	Gov Eq (7)	0	0	0	0	0	0	0	0	0	0	0	1	-4	6	-4	1	0		0
	Gov Eq (8)	0	0	0	0	0	0	0	0	0	0	0	0	1	-4	6	-4	1		0
	Bo Co 1 (1)	0	0	1	0	0	0	0	0	0	0	0	0	0	0	0	0	0		0
	Bo Co 2 (1)	-0.326267	0.152533	0	-0.152533	0.326267	0	0	0	0	0	0	0	0	0	0	0	0		0
	Bo Co 1 (8)	0	0	0	0	0	0	0	0	0	0	0	0	0	0	1	0	0		0
	Bo Co 2 (8)	0	0	0	0	0	0	0	0	0	0	0	0	0.0833333	-1.33333	2.5	-1.33333	0.0833333		0
	Co Co 1 (5)	0	0	0	0	0	0	1	0	0	0	0	-1	0	0	0	0	0		0
	Co Co 2 (5)	0	0	0	0	-0.261013	0.122027	0	-0.122027	0.261013	0.556667	-0.613333	0	0.613333	-0.556667	0	0	0		0
	Co Co 3 (5)	0	0	0	0	0.0533333	-0.853333	1.6	-0.853333	0.0533333	-0.0833333	1.33333	-2.5	1.33333	-0.0833333	0	0	0		0
	Co Co 4 (5)	0	0	0	0	0.256	-0.512	0	0.512	-0.256	-0.5	1	0	-1	0.5	0	0	0		10
				-1	34.8629
				0	2.7841
				1	3.85916e-15
				2	16.2174
				3	41.1431
				4	64.484
				5l	75.9467
				5a	65.2381
				5b	22.065
				5c	63.5127
				5d	79.1895
				5r	75.9467
				6	58.5142
				7	31.6221
				8	0
				9	-31.6221
				10	-58.5142
	Calculation of the bending moments
			x[m]	Moment
		Node 1	0	-12.161	kNm
		Node 2	1.25	-5.57332	kNm
		Node 3	2.5	1.01434	kNm
		Node 4	3.75	7.60199	kNm
		Node 5	5	14.1896	kNm
		Node 7	6	9.45976	kNm
		Node 8	7	4.72988	kNm
		Node 9	8	1.77636e-14	kNm
	W FDM approximation
	Three-point grid
	number of grid points	n=	3
	P =	10	kN
	h1 =	5	m	bl1=	0.625
	h2 =	3	m	bl2=	0.375
	a = EI/kGAl²=	0.02
		-1	0	1	2l	2a	2b	2c	2d	2r	3	4	5
	Gov Eq (1)	1	-4	6	-4	1	0	0	0	0	0	0	0		0
	Gov Eq (2l)	0	1	-4	6	-4	1	0	0	0	0	0	0		0
	Gov Eq (2r)	0	0	0	0	0	0	1	-4	6	-4	1	0		0
	Gov Eq (3)	0	0	0	0	0	0	0	1	-4	6	-4	1		0
	Bo Co 1 (1)	0	0	1	0	0	0	0	0	0	0	0	0		0
	Bo Co 2 (1)	0.0577333	-0.615467	0	0.615467	-0.0577333	0	0	0	0	0	0	0		0
	Bo Co 1 (3)	0	0	0	0	0	0	0	0	0	1	0	0		0
	Bo Co 2 (3)	0	0	0	0	0	0	0	1	-16	30	-16	1		0
	Co Co 1 (2)	0	0	0	1	0	0	0	0	-1	0	0	0		0
	Co Co 2 (2)	0	0.0115467	-0.123093	0	0.123093	-0.0115467	-0.00407407	0.174815	0	-0.174815	0.00407407	0		0
	Co Co 3 (2)	0	0.00333333	-0.0533333	0.1	-0.0533333	0.00333333	-0.00925926	0.148148	-0.277778	0.148148	-0.00925926	0		0
	Co Co 4 (2)	0	0.004	-0.008	0	0.008	-0.004	-0.0185185	0.037037	0	-0.037037	0.0185185	0		10
				-1	1418.94
				0	228.077
				1	0
				2l	75.9467
				2a	-202.848
				2b	-1495.15
				2c	-282.987
				2d	24.1866
				2r	75.9467
				3	0
				4	-75.9467
				5	-24.1866
	Calculation of the bending moments
			x[m]	Moment
		Node 1	0	-12.161	kNm
		Node 2	5	14.1896	kNm
		Node 3	8	6.25014e-16	kNm
