# Supplementary material for: Timoshenko Beam Theory:First-Order Analysis, Second-Order Analysis, Stability, and Vibration Analysis Using the Finite Difference Method
Source: Preprints.org preprint supplement (doi:10.20944/preprints202105.0252.v1), 2021-05-11
Supplement: Supplementary file 3 [file Fixed pinned beam subjected to a uniformly distributed load.xlsx]

## Sheet: W-Fi FDM approximation
		Uniform fixed-pinned beam subjected to a uniformly distributed load
				Classical Beam Theory
		Distributed load q(x) =	10	kN/m
		Beam length l =	8	m
		a = EI/kGAl²=	0.025
		Moment at fixed end M1 =	-74.4186	kNm
		x[m]	M0(x)	m(x)	M(x)
	Position 1	0	0	1	-74.4186	kNm
	Position 2	2	60	0.75	4.18605	kNm
	Position 3	4	80	0.5	42.7907	kNm
	Position 4	6	60	0.25	41.3953	kNm
	Position 5	8	0	0	0	kNm
		W-F FDM approximation
			Five-point grid
		Distributed load q(x) =	10	kN/m
		hk =	2	m		The governing equations
		a = EI/kGAl²=	0.025
		blk =	0.25
	W0	hkF0	W1	hkF1	W2	hkF2	W3	hkF3	W4	hkF4	W5	hkF5	W6	hkF6
Gov Eq 1 (1)	1	0.5	-2	0	1	-0.5	0	0	0	0	0	0	0	0		-64
Gov Eq 2 (1)	-1	0.8	0	-3.6	1	0.8	0	0	0	0	0	0	0	0		0
Gov Eq 1 (2)	0	0	1	0.5	-2	0	1	-0.5	0	0	0	0	0	0		-64
Gov Eq 2 (2)	0	0	-1	0.8	0	-3.6	1	0.8	0	0	0	0	0	0		0
Gov Eq 1 (3)	0	0	0	0	1	0.5	-2	0	1	-0.5	0	0	0	0		-64
Gov Eq 2 (3)	0	0	0	0	-1	0.8	0	-3.6	1	0.8	0	0	0	0		0
Gov Eq 1 (4)	0	0	0	0	0	0	1	0.5	-2	0	1	-0.5	0	0		-64
Gov Eq 2 (4)	0	0	0	0	0	0	-1	0.8	0	-3.6	1	0.8	0	0		0
Gov Eq 1 (5)	0	0	0	0	0	0	0	0	1	0.5	-2	0	1	-0.5		-64
Gov Eq 2 (5)	0	0	0	0	0	0	0	0	-1	0.8	0	-3.6	1	0.8		0
BoCo 1 (1)	0	0	1	0	0	0	0	0	0	0	0	0	0	0		0
BoCo 2 (1)	0	0	0	1	0	0	0	0	0	0	0	0	0	0		0
BoCo 1 (5)	0	0	0	0	0	0	0	0	0	0	1	0	0	0		0
BoCo 2 (5)	0	0	0	0	0	0	0	0	0	1	0	0	0	-1		0
		W0	-30.6649			Calculation of the bending moments
		hkF0	-323.755		Position		FDM	Exact	Difference %
		W1	8.34888e-14		0	M1 =	-50.0652	-74.4186	-48.6434
		hkF1	-1.25968e-14		2	M2 =	-0.625815	4.18605	768.895
		W2	166.926		4	M3 =	24.1982	42.7907	-76.8344
		hkF2	76.7666		6	M4 =	24.4068	41.3953	-69.6059
		W3	272.355		8	M5 =	0	0
		hkF3	5.00652
		W4	216.991
		hkF4	-116.819
		W5	-2.94552e-14
		hkF5	-190.248
		W6	-280.991
		hkF6	-116.819
		W-F FDM approximation
			Nine-point grid
		Distributed load q(x) =	10	kN/m
		hk =	1	m		The governing equations
		a = EI/kGAl²=	0.025
		blk =	0.125
	W0	hkF0	W1	hkF1	W2	hkF2	W3	hkF3	W4	hkF4	W5	hkF5	W6	hkF6	W7	hkF7	W8	hkF8	W9	hkF9	W10	hkF10
Gov Eq 1 (1)	1	0.5	-2	0	1	-0.5	0	0	0	0	0	0	0	0	0	0	0	0	0	0	0	0		-16
Gov Eq 2 (1)	-1	3.2	0	-8.4	1	3.2	0	0	0	0	0	0	0	0	0	0	0	0	0	0	0	0		0
Gov Eq 1 (2)	0	0	1	0.5	-2	0	1	-0.5	0	0	0	0	0	0	0	0	0	0	0	0	0	0		-16
Gov Eq 2 (2)	0	0	-1	3.2	0	-8.4	1	3.2	0	0	0	0	0	0	0	0	0	0	0	0	0	0		0
Gov Eq 1 (3)	0	0	0	0	1	0.5	-2	0	1	-0.5	0	0	0	0	0	0	0	0	0	0	0	0		-16
Gov Eq 2 (3)	0	0	0	0	-1	3.2	0	-8.4	1	3.2	0	0	0	0	0	0	0	0	0	0	0	0		0
Gov Eq 1 (4)	0	0	0	0	0	0	1	0.5	-2	0	1	-0.5	0	0	0	0	0	0	0	0	0	0		-16
Gov Eq 2 (4)	0	0	0	0	0	0	-1	3.2	0	-8.4	1	3.2	0	0	0	0	0	0	0	0	0	0		0
Gov Eq 1 (5)	0	0	0	0	0	0	0	0	1	0.5	-2	0	1	-0.5	0	0	0	0	0	0	0	0		-16
Gov Eq 2 (5)	0	0	0	0	0	0	0	0	-1	3.2	0	-8.4	1	3.2	0	0	0	0	0	0	0	0		0
Gov Eq 1 (6)	0	0	0	0	0	0	0	0	0	0	1	0.5	-2	0	1	-0.5	0	0	0	0	0	0		-16
Gov Eq 2 (6)	0	0	0	0	0	0	0	0	0	0	-1	3.2	0	-8.4	1	3.2	0	0	0	0	0	0		0
Gov Eq 1 (7)	0	0	0	0	0	0	0	0	0	0	0	0	1	0.5	-2	0	1	-0.5	0	0	0	0		-16
Gov Eq 2 (7)	0	0	0	0	0	0	0	0	0	0	0	0	-1	3.2	0	-8.4	1	3.2	0	0	0	0		0
Gov Eq 1 (8)	0	0	0	0	0	0	0	0	0	0	0	0	0	0	1	0.5	-2	0	1	-0.5	0	0		-16
Gov Eq 2 (8)	0	0	0	0	0	0	0	0	0	0	0	0	0	0	-1	3.2	0	-8.4	1	3.2	0	0		0
Gov Eq 1 (9)	0	0	0	0	0	0	0	0	0	0	0	0	0	0	0	0	1	0.5	-2	0	1	-0.5		-16
Gov Eq 2 (9)	0	0	0	0	0	0	0	0	0	0	0	0	0	0	0	0	-1	3.2	0	-8.4	1	3.2		0
BoCo 1 (1)	0	0	1	0	0	0	0	0	0	0	0	0	0	0	0	0	0	0	0	0	0	0		0
BoCo 2 (1)	0	0	0	1	0	0	0	0	0	0	0	0	0	0	0	0	0	0	0	0	0	0		0
BoCo 1 (9)	0	0	0	0	0	0	0	0	0	0	0	0	0	0	0	0	0	0	1	0	0	0		0
BoCo 2 (9)	0	0	0	0	0	0	0	0	0	0	0	0	0	0	0	0	0	-1	0	0	0	1		0
		W0	-43.583			Calculation of the bending moments
		hkF0	-87.3102		Position		FDM	Exact	Difference %
		W1	1.9984e-15		0	M1 =	-65.8945	-74.4186	-12.936
		hkF1	-2.74855e-14		1	M2 =	-27.3874	-30.1163	-9.96405
		W2	93.4775		2	M3 =	2.47104	4.18605	-69.4041
		hkF2	44.4788		3	M4 =	23.6808	28.4884	-20.3014
		W3	198.342		4	M5 =	36.242	42.7907	-18.0695
		hkF3	54.7748		5	M6 =	40.1544	47.093	-17.2797
		W4	284.736		6	M7 =	35.4183	41.3953	-16.8757
		hkF4	39.5367		7	M8 =	22.0335	25.6977	-16.6302
		W5	331.449		8	M9 =	0	0
		hkF5	7.41313
		W6	325.92							Position	FDM
		hkF6	-32.9472							0	-65.8945
		W7	264.237							2	2.47104
		hkF7	-72.8958							4	36.242
		W8	151.135							6	35.4183
		hkF8	-103.784							8	0
		W9	-1.0752e-14
		hkF9	-116.963
		W10	-167.135
		hkF10	-103.784
		W-F FDM approximation
			Thirteen-point grid
		Distributed load q(x) =	10	kN/m
		hk =	0.666667	m		The governing equations
		a = EI/kGAl²=	0.025
		blk =	0.0833333
	W0	hkF0	W1	hkF1	W2	hkF2	W3	hkF3	W4	hkF4	W5	hkF5	W6	hkF6	W7	hkF7	W8	hkF8	W9	hkF9	W10	hkF10	W11	hkF11	W12	hkF12	W13	hkF13	W14	hkF14
Gov Eq 1 (1)	1	0.5	-2	0	1	-0.5	0	0	0	0	0	0	0	0	0	0	0	0	0	0	0	0	0	0	0	0	0	0	0	0		-7.11111
Gov Eq 2 (1)	-1	7.2	0	-16.4	1	7.2	0	0	0	0	0	0	0	0	0	0	0	0	0	0	0	0	0	0	0	0	0	0	0	0		0
Gov Eq 1 (2)	0	0	1	0.5	-2	0	1	-0.5	0	0	0	0	0	0	0	0	0	0	0	0	0	0	0	0	0	0	0	0	0	0		-7.11111
Gov Eq 2 (2)	0	0	-1	7.2	0	-16.4	1	7.2	0	0	0	0	0	0	0	0	0	0	0	0	0	0	0	0	0	0	0	0	0	0		0
Gov Eq 1 (3)	0	0	0	0	1	0.5	-2	0	1	-0.5	0	0	0	0	0	0	0	0	0	0	0	0	0	0	0	0	0	0	0	0		-7.11111
Gov Eq 2 (3)	0	0	0	0	-1	7.2	0	-16.4	1	7.2	0	0	0	0	0	0	0	0	0	0	0	0	0	0	0	0	0	0	0	0		0
Gov Eq 1 (4)	0	0	0	0	0	0	1	0.5	-2	0	1	-0.5	0	0	0	0	0	0	0	0	0	0	0	0	0	0	0	0	0	0		-7.11111
Gov Eq 2 (4)	0	0	0	0	0	0	-1	7.2	0	-16.4	1	7.2	0	0	0	0	0	0	0	0	0	0	0	0	0	0	0	0	0	0		0
Gov Eq 1 (5)	0	0	0	0	0	0	0	0	1	0.5	-2	0	1	-0.5	0	0	0	0	0	0	0	0	0	0	0	0	0	0	0	0		-7.11111
Gov Eq 2 (5)	0	0	0	0	0	0	0	0	-1	7.2	0	-16.4	1	7.2	0	0	0	0	0	0	0	0	0	0	0	0	0	0	0	0		0
Gov Eq 1 (6)	0	0	0	0	0	0	0	0	0	0	1	0.5	-2	0	1	-0.5	0	0	0	0	0	0	0	0	0	0	0	0	0	0		-7.11111
Gov Eq 2 (6)	0	0	0	0	0	0	0	0	0	0	-1	7.2	0	-16.4	1	7.2	0	0	0	0	0	0	0	0	0	0	0	0	0	0		0
Gov Eq 1 (7)	0	0	0	0	0	0	0	0	0	0	0	0	1	0.5	-2	0	1	-0.5	0	0	0	0	0	0	0	0	0	0	0	0		-7.11111
Gov Eq 2 (7)	0	0	0	0	0	0	0	0	0	0	0	0	-1	7.2	0	-16.4	1	7.2	0	0	0	0	0	0	0	0	0	0	0	0		0
Gov Eq 1 (8)	0	0	0	0	0	0	0	0	0	0	0	0	0	0	1	0.5	-2	0	1	-0.5	0	0	0	0	0	0	0	0	0	0		-7.11111
Gov Eq 2 (8)	0	0	0	0	0	0	0	0	0	0	0	0	0	0	-1	7.2	0	-16.4	1	7.2	0	0	0	0	0	0	0	0	0	0		0
Gov Eq 1 (9)	0	0	0	0	0	0	0	0	0	0	0	0	0	0	0	0	1	0.5	-2	0	1	-0.5	0	0	0	0	0	0	0	0		-7.11111
Gov Eq 2 (9)	0	0	0	0	0	0	0	0	0	0	0	0	0	0	0	0	-1	7.2	0	-16.4	1	7.2	0	0	0	0	0	0	0	0		0
Gov Eq 1 (10)	0	0	0	0	0	0	0	0	0	0	0	0	0	0	0	0	0	0	1	0.5	-2	0	1	-0.5	0	0	0	0	0	0		-7.11111
Gov Eq 2 (10)	0	0	0	0	0	0	0	0	0	0	0	0	0	0	0	0	0	0	-1	7.2	0	-16.4	1	7.2	0	0	0	0	0	0		0
Gov Eq 1 (11)	0	0	0	0	0	0	0	0	0	0	0	0	0	0	0	0	0	0	0	0	1	0.5	-2	0	1	-0.5	0	0	0	0		-7.11111
Gov Eq 2 (11)	0	0	0	0	0	0	0	0	0	0	0	0	0	0	0	0	0	0	0	0	-1	7.2	0	-16.4	1	7.2	0	0	0	0		0
Gov Eq 1 (12)	0	0	0	0	0	0	0	0	0	0	0	0	0	0	0	0	0	0	0	0	0	0	1	0.5	-2	0	1	-0.5	0	0		-7.11111
Gov Eq 2 (12)	0	0	0	0	0	0	0	0	0	0	0	0	0	0	0	0	0	0	0	0	0	0	-1	7.2	0	-16.4	1	7.2	0	0		0
Gov Eq 1 (13)	0	0	0	0	0	0	0	0	0	0	0	0	0	0	0	0	0	0	0	0	0	0	0	0	1	0.5	-2	0	1	-0.5		-7.11111
Gov Eq 2 (13)	0	0	0	0	0	0	0	0	0	0	0	0	0	0	0	0	0	0	0	0	0	0	0	0	-1	7.2	0	-16.4	1	7.2		0
BoCo 1 (1)	0	0	1	0	0	0	0	0	0	0	0	0	0	0	0	0	0	0	0	0	0	0	0	0	0	0	0	0	0	0		0
BoCo 2 (1)	0	0	0	1	0	0	0	0	0	0	0	0	0	0	0	0	0	0	0	0	0	0	0	0	0	0	0	0	0	0		0
BoCo 1 (13)	0	0	0	0	0	0	0	0	0	0	0	0	0	0	0	0	0	0	0	0	0	0	0	0	0	0	1	0	0	0		0
BoCo 2 (13)	0	0	0	0	0	0	0	0	0	0	0	0	0	0	0	0	0	0	0	0	0	0	0	0	0	-1	0	0	0	1		0
		W0	-37.2005			Calculation of the bending moments
		hkF0	-38.0993		Position		FDM	Exact	Difference %
		W1	-5.10703e-15		0	M1 =	-70.3256	-74.4186	-5.82015
		hkF1	6.00321e-14		0.666667	M2 =	-41.6079	-43.7726	-5.20252
		W2	61.3452		1.33333	M3 =	-17.0462	-17.5711	-3.07912
		hkF2	24.4124		2	M4 =	3.35973	4.18605	-24.5947
		W3	134.072		2.66667	M5 =	19.6098	21.4987	-9.63245		Position	FDM
		hkF3	36.9848		3.33333	M6 =	31.704	34.3669	-8.39922		0	-70.3256
		W4	207.263		4	M7 =	39.6424	42.7907	-7.94169		2	3.35973
		hkF4	39.5645		4.66667	M8 =	43.425	46.77	-7.7031		4	39.6424
		W5	271.85		5.33333	M9 =	43.0517	46.3049	-7.55663		6	38.5225
		hkF5	33.9984		6	M10 =	38.5225	41.3953	-7.45757		8	0
		W6	320.611		6.66667	M11 =	29.8375	32.0413	-7.3861
		hkF6	22.1336		7.33333	M12 =	16.9967	18.2429	-7.3321
		W7	348.17		8	M13 =	0	0
		hkF7	5.81705
		W8	350.998
		hkF8	-13.1041
		W9	327.416
		hkF9	-32.7829
		W10	277.589
		hkF10	-51.3723
		W11	203.529
		hkF11	-67.0251
		W12	109.097
		hkF12	-77.8945
		W13	-9.86076e-32
		hkF13	-82.1333
		W14	-116.208
		hkF14	-77.8945
		W-F FDM approximation
			Seventeen-point grid
		Distributed load q(x) =	10	kN/m
		hk =	0.5	m		The governing equations
		a = EI/kGAl²=	0.025
		blk =	0.0625
	W0	hkF0	W1	hkF1	W2	hkF2	W3	hkF3	W4	hkF4	W5	hkF5	W6	hkF6	W7	hkF7	W8	hkF8	W9	hkF9	W10	hkF10	W11	hkF11	W12	hkF12	W13	hkF13	W14	hkF14	W15	hkF15	W16	hkF16	W17	hkF17	W18	hkF18
Gov Eq 1 (1)	1	0.5	-2	0	1	-0.5	0	0	0	0	0	0	0	0	0	0	0	0	0	0	0	0	0	0	0	0	0	0	0	0	0	0	0	0	0	0	0	0		-4
Gov Eq 2 (1)	-1	12.8	0	-27.6	1	12.8	0	0	0	0	0	0	0	0	0	0	0	0	0	0	0	0	0	0	0	0	0	0	0	0	0	0	0	0	0	0	0	0		0
Gov Eq 1 (2)	0	0	1	0.5	-2	0	1	-0.5	0	0	0	0	0	0	0	0	0	0	0	0	0	0	0	0	0	0	0	0	0	0	0	0	0	0	0	0	0	0		-4
Gov Eq 2 (2)	0	0	-1	12.8	0	-27.6	1	12.8	0	0	0	0	0	0	0	0	0	0	0	0	0	0	0	0	0	0	0	0	0	0	0	0	0	0	0	0	0	0		0
Gov Eq 1 (3)	0	0	0	0	1	0.5	-2	0	1	-0.5	0	0	0	0	0	0	0	0	0	0	0	0	0	0	0	0	0	0	0	0	0	0	0	0	0	0	0	0		-4
Gov Eq 2 (3)	0	0	0	0	-1	12.8	0	-27.6	1	12.8	0	0	0	0	0	0	0	0	0	0	0	0	0	0	0	0	0	0	0	0	0	0	0	0	0	0	0	0		0
Gov Eq 1 (4)	0	0	0	0	0	0	1	0.5	-2	0	1	-0.5	0	0	0	0	0	0	0	0	0	0	0	0	0	0	0	0	0	0	0	0	0	0	0	0	0	0		-4
Gov Eq 2 (4)	0	0	0	0	0	0	-1	12.8	0	-27.6	1	12.8	0	0	0	0	0	0	0	0	0	0	0	0	0	0	0	0	0	0	0	0	0	0	0	0	0	0		0
Gov Eq 1 (5)	0	0	0	0	0	0	0	0	1	0.5	-2	0	1	-0.5	0	0	0	0	0	0	0	0	0	0	0	0	0	0	0	0	0	0	0	0	0	0	0	0		-4
Gov Eq 2 (5)	0	0	0	0	0	0	0	0	-1	12.8	0	-27.6	1	12.8	0	0	0	0	0	0	0	0	0	0	0	0	0	0	0	0	0	0	0	0	0	0	0	0		0
Gov Eq 1 (6)	0	0	0	0	0	0	0	0	0	0	1	0.5	-2	0	1	-0.5	0	0	0	0	0	0	0	0	0	0	0	0	0	0	0	0	0	0	0	0	0	0		-4
Gov Eq 2 (6)	0	0	0	0	0	0	0	0	0	0	-1	12.8	0	-27.6	1	12.8	0	0	0	0	0	0	0	0	0	0	0	0	0	0	0	0	0	0	0	0	0	0		0
Gov Eq 1 (7)	0	0	0	0	0	0	0	0	0	0	0	0	1	0.5	-2	0	1	-0.5	0	0	0	0	0	0	0	0	0	0	0	0	0	0	0	0	0	0	0	0		-4
Gov Eq 2 (7)	0	0	0	0	0	0	0	0	0	0	0	0	-1	12.8	0	-27.6	1	12.8	0	0	0	0	0	0	0	0	0	0	0	0	0	0	0	0	0	0	0	0		0
Gov Eq 1 (8)	0	0	0	0	0	0	0	0	0	0	0	0	0	0	1	0.5	-2	0	1	-0.5	0	0	0	0	0	0	0	0	0	0	0	0	0	0	0	0	0	0		-4
Gov Eq 2 (8)	0	0	0	0	0	0	0	0	0	0	0	0	0	0	-1	12.8	0	-27.6	1	12.8	0	0	0	0	0	0	0	0	0	0	0	0	0	0	0	0	0	0		0
Gov Eq 1 (9)	0	0	0	0	0	0	0	0	0	0	0	0	0	0	0	0	1	0.5	-2	0	1	-0.5	0	0	0	0	0	0	0	0	0	0	0	0	0	0	0	0		-4
Gov Eq 2 (9)	0	0	0	0	0	0	0	0	0	0	0	0	0	0	0	0	-1	12.8	0	-27.6	1	12.8	0	0	0	0	0	0	0	0	0	0	0	0	0	0	0	0		0
Gov Eq 1 (10)	0	0	0	0	0	0	0	0	0	0	0	0	0	0	0	0	0	0	1	0.5	-2	0	1	-0.5	0	0	0	0	0	0	0	0	0	0	0	0	0	0		-4
Gov Eq 2 (10)	0	0	0	0	0	0	0	0	0	0	0	0	0	0	0	0	0	0	-1	12.8	0	-27.6	1	12.8	0	0	0	0	0	0	0	0	0	0	0	0	0	0		0
Gov Eq 1 (11)	0	0	0	0	0	0	0	0	0	0	0	0	0	0	0	0	0	0	0	0	1	0.5	-2	0	1	-0.5	0	0	0	0	0	0	0	0	0	0	0	0		-4
Gov Eq 2 (11)	0	0	0	0	0	0	0	0	0	0	0	0	0	0	0	0	0	0	0	0	-1	12.8	0	-27.6	1	12.8	0	0	0	0	0	0	0	0	0	0	0	0		0
Gov Eq 1 (12)	0	0	0	0	0	0	0	0	0	0	0	0	0	0	0	0	0	0	0	0	0	0	1	0.5	-2	0	1	-0.5	0	0	0	0	0	0	0	0	0	0		-4
Gov Eq 2 (12)	0	0	0	0	0	0	0	0	0	0	0	0	0	0	0	0	0	0	0	0	0	0	-1	12.8	0	-27.6	1	12.8	0	0	0	0	0	0	0	0	0	0		0
Gov Eq 1 (13)	0	0	0	0	0	0	0	0	0	0	0	0	0	0	0	0	0	0	0	0	0	0	0	0	1	0.5	-2	0	1	-0.5	0	0	0	0	0	0	0	0		-4
Gov Eq 2 (13)	0	0	0	0	0	0	0	0	0	0	0	0	0	0	0	0	0	0	0	0	0	0	0	0	-1	12.8	0	-27.6	1	12.8	0	0	0	0	0	0	0	0		0
Gov Eq 1 (14)	0	0	0	0	0	0	0	0	0	0	0	0	0	0	0	0	0	0	0	0	0	0	0	0	0	0	1	0.5	-2	0	1	-0.5	0	0	0	0	0	0		-4
Gov Eq 2 (14)	0	0	0	0	0	0	0	0	0	0	0	0	0	0	0	0	0	0	0	0	0	0	0	0	0	0	-1	12.8	0	-27.6	1	12.8	0	0	0	0	0	0		0
Gov Eq 1 (15)	0	0	0	0	0	0	0	0	0	0	0	0	0	0	0	0	0	0	0	0	0	0	0	0	0	0	0	0	1	0.5	-2	0	1	-0.5	0	0	0	0		-4
Gov Eq 2 (15)	0	0	0	0	0	0	0	0	0	0	0	0	0	0	0	0	0	0	0	0	0	0	0	0	0	0	0	0	-1	12.8	0	-27.6	1	12.8	0	0	0	0		0
Gov Eq 1 (16)	0	0	0	0	0	0	0	0	0	0	0	0	0	0	0	0	0	0	0	0	0	0	0	0	0	0	0	0	0	0	1	0.5	-2	0	1	-0.5	0	0		-4
Gov Eq 2 (16)	0	0	0	0	0	0	0	0	0	0	0	0	0	0	0	0	0	0	0	0	0	0	0	0	0	0	0	0	0	0	-1	12.8	0	-27.6	1	12.8	0	0		0
Gov Eq 1 (17)	0	0	0	0	0	0	0	0	0	0	0	0	0	0	0	0	0	0	0	0	0	0	0	0	0	0	0	0	0	0	0	0	1	0.5	-2	0	1	-0.5		-4
Gov Eq 2 (17)	0	0	0	0	0	0	0	0	0	0	0	0	0	0	0	0	0	0	0	0	0	0	0	0	0	0	0	0	0	0	0	0	-1	12.8	0	-27.6	1	12.8		0
BoCo 1 (1)	0	0	1	0	0	0	0	0	0	0	0	0	0	0	0	0	0	0	0	0	0	0	0	0	0	0	0	0	0	0	0	0	0	0	0	0	0	0		0
BoCo 2 (1)	0	0	0	1	0	0	0	0	0	0	0	0	0	0	0	0	0	0	0	0	0	0	0	0	0	0	0	0	0	0	0	0	0	0	0	0	0	0		0
BoCo 1 (17)	0	0	0	0	0	0	0	0	0	0	0	0	0	0	0	0	0	0	0	0	0	0	0	0	0	0	0	0	0	0	0	0	0	0	1	0	0	0		0
BoCo 2 (17)	0	0	0	0	0	0	0	0	0	0	0	0	0	0	0	0	0	0	0	0	0	0	0	0	0	0	0	0	0	0	0	0	0	-1	0	0	0	1		0
		W0	-30.9958			Calculation of the bending moments
		hkF0	-20.9813		Position		FDM	Exact	Difference %
		W1	9.72833e-15		0	M1 =	-72.0495	-74.4186	-3.28809
		hkF1	-1.47751e-14		0.5	M2 =	-49.5013	-51.0174	-3.06275
		W2	45.0081		1	M3 =	-29.3591	-30.1163	-2.57888
		hkF2	15.0435		1.5	M4 =	-11.623	-11.7151	-0.792848
		W3	98.3916		2	M5 =	3.7072	4.18605	-12.9166
		hkF3	24.7507		2.5	M6 =	16.6313	17.5872	-5.74734
		W4	155.115		3	M7 =	27.1495	28.4884	-4.93154			Position	FDM
		hkF4	29.7231		3.5	M8 =	35.2616	36.8895	-4.61673			0	-72.0495
		W5	210.744		4	M9 =	40.9677	42.7907	-4.44982			2	3.7072
		hkF5	30.5622		4.5	M10 =	44.2678	46.1919	-4.34642			4	40.9677
		W6	261.446		5	M11 =	45.1619	47.093	-4.27607			6	39.732
		hkF6	27.8695		5.5	M12 =	43.6499	45.4942	-4.22511			8	-1.42109e-14
		W7	303.99		6	M13 =	39.732	41.3953	-4.18649
		hkF7	22.2465		6.5	M14 =	33.408	34.7965	-4.15622
		W8	335.747		7	M15 =	24.678	25.6977	-4.13184
		hkF8	14.2947		7.5	M16 =	13.542	14.0988	-4.1118
		W9	354.689		8	M17 =	-1.42109e-14	0
		hkF9	4.61567
		W10	359.389
		hkF10	-6.18914
		W11	349.021
		hkF11	-17.5182
		W12	323.364
		hkF12	-28.7701
		W13	282.793
		hkF13	-39.3432
		W14	228.29
		hkF14	-48.6361
		W15	161.435
		hkF15	-56.0472
		W16	84.4102
		hkF16	-60.9751
		W17	7.4934e-15
		hkF17	-62.8182
		W18	-88.4102
		hkF18	-60.9751

## Sheet: M-W FDM approximation
		Uniform fixed-pinned beam subjected to a uniformly distributed load
				Classical Beam Theory
		Distributed load q(x) =	10	kN/m
		Beam length l =	8	m
		a = EI/kGAl²=	0.025
		Moment at fixed end M1 =	-74.4186	kNm
		x[m]	M0(x)	m(x)	M(x)
	Position 1	0	0	1	-74.4186	kNm
	Position 2	2	60	0.75	4.18605	kNm
	Position 3	4	80	0.5	42.7907	kNm
	Position 4	6	60	0.25	41.3953	kNm
	Position 5	8	0	0	0	kNm
			M-W FDM approximation
			Five-point grid
		Distributed load q(x) =	10	kN/m
		hk =	2	m		The governing equations
		a = EI/kGAl²=	0.025
		blk =	0.25
	W0	hk2M0	W1	hk2M1	W2	hk2M2	W3	hk2M3	W4	hk2M4	W5	hk2M5	W6	hk2M6
Gov Eq 1 (1)	0	1	0	-2	0	1	0	0	0	0	0	0	0	0		-160
Gov Eq 2 (1)	1	-0.4	-2	1.8	1	-0.4	0	0	0	0	0	0	0	0		0
Gov Eq 1 (2)	0	0	0	1	0	-2	0	1	0	0	0	0	0	0		-160
Gov Eq 2 (2)	0	0	1	-0.4	-2	1.8	1	-0.4	0	0	0	0	0	0		0
Gov Eq 1 (3)	0	0	0	0	0	1	0	-2	0	1	0	0	0	0		-160
Gov Eq 2 (3)	0	0	0	0	1	-0.4	-2	1.8	1	-0.4	0	0	0	0		0
Gov Eq 1 (4)	0	0	0	0	0	0	0	1	0	-2	0	1	0	0		-160
Gov Eq 2 (4)	0	0	0	0	0	0	1	-0.4	-2	1.8	1	-0.4	0	0		0
Gov Eq 1 (5)	0	0	0	0	0	0	0	0	0	1	0	-2	0	1		-160
Gov Eq 2 (5)	0	0	0	0	0	0	0	0	1	-0.4	-2	1.8	1	-0.4		0
BoCo 1 (1)	0	0	1	0	0	0	0	0	0	0	0	0	0	0		0
BoCo 2 (1)	-0.5	0.2	0	0	0.5	-0.2	0	0	0	0	0	0	0	0		0
BoCo 1 (5)	0	0	0	0	0	0	0	0	0	0	1	0	0	0		0
BoCo 2 (5)	0	0	0	0	0	0	0	0	0	0	0	1	0	0		0
		W0	-51.5254			Calculation of the bending moments
		hk2M0	-738.983		Position		FDM	Exact	Difference %
		W1	4.44089e-15		0	M1 =	-67.7966	-74.4186	-9.76744
		hk2M1	-271.186		2	M2 =	9.15254	4.18605	54.2636
		W2	258.712		4	M3 =	46.1017	42.7907	7.18194
		hk2M2	36.6102		6	M4 =	43.0508	41.3953	3.84545
		W3	416.814		8	M5 =	5.09533e-16	0
		hk2M3	184.407
		W4	326.508
		hk2M4	172.203
		W5	5.80408e-15
		hk2M5	2.03813e-15
		W6	-390.508
		hk2M6	-332.203
		M-W FDM approximation
		Nine-point grid
		Distributed load q(x) =	10	kN/m
		hk =	1	m		The governing equations
		a = EI/kGAl²=	0.025
		blk =	0.125
	W0	hk2M0	W1	hk2M1	W2	hk2M2	W3	hk2M3	W4	hk2M4	W5	hk2M5	W6	hk2M6	W7	hk2M7	W8	hk2M8	W9	hk2M9	W10	hk2M10
Gov Eq 1 (1)	0	1	0	-2	0	1	0	0	0	0	0	0	0	0	0	0	0	0	0	0	0	0		-10
Gov Eq 2 (1)	1	-1.6	-2	4.2	1	-1.6	0	0	0	0	0	0	0	0	0	0	0	0	0	0	0	0		0
Gov Eq 1 (2)	0	0	0	1	0	-2	0	1	0	0	0	0	0	0	0	0	0	0	0	0	0	0		-10
Gov Eq 2 (2)	0	0	1	-1.6	-2	4.2	1	-1.6	0	0	0	0	0	0	0	0	0	0	0	0	0	0		0
Gov Eq 1 (3)	0	0	0	0	0	1	0	-2	0	1	0	0	0	0	0	0	0	0	0	0	0	0		-10
Gov Eq 2 (3)	0	0	0	0	1	-1.6	-2	4.2	1	-1.6	0	0	0	0	0	0	0	0	0	0	0	0		0
Gov Eq 1 (4)	0	0	0	0	0	0	0	1	0	-2	0	1	0	0	0	0	0	0	0	0	0	0		-10
Gov Eq 2 (4)	0	0	0	0	0	0	1	-1.6	-2	4.2	1	-1.6	0	0	0	0	0	0	0	0	0	0		0
Gov Eq 1 (5)	0	0	0	0	0	0	0	0	0	1	0	-2	0	1	0	0	0	0	0	0	0	0		-10
Gov Eq 2 (5)	0	0	0	0	0	0	0	0	1	-1.6	-2	4.2	1	-1.6	0	0	0	0	0	0	0	0		0
Gov Eq 1 (6)	0	0	0	0	0	0	0	0	0	0	0	1	0	-2	0	1	0	0	0	0	0	0		-10
Gov Eq 2 (6)	0	0	0	0	0	0	0	0	0	0	1	-1.6	-2	4.2	1	-1.6	0	0	0	0	0	0		0
Gov Eq 1 (7)	0	0	0	0	0	0	0	0	0	0	0	0	0	1	0	-2	0	1	0	0	0	0		-10
Gov Eq 2 (7)	0	0	0	0	0	0	0	0	0	0	0	0	1	-1.6	-2	4.2	1	-1.6	0	0	0	0		0
Gov Eq 1 (8)	0	0	0	0	0	0	0	0	0	0	0	0	0	0	0	1	0	-2	0	1	0	0		-10
Gov Eq 2 (8)	0	0	0	0	0	0	0	0	0	0	0	0	0	0	1	-1.6	-2	4.2	1	-1.6	0	0		0
Gov Eq 1 (9)	0	0	0	0	0	0	0	0	0	0	0	0	0	0	0	0	0	1	0	-2	0	1		-10
Gov Eq 2 (9)	0	0	0	0	0	0	0	0	0	0	0	0	0	0	0	0	1	-1.6	-2	4.2	1	-1.6		0
BoCo 1 (1)	0	0	1	0	0	0	0	0	0	0	0	0	0	0	0	0	0	0	0	0	0	0		0
BoCo 2 (1)	-1	1.6	0	0	1	-1.6	0	0	0	0	0	0	0	0	0	0	0	0	0	0	0	0		0
BoCo 1 (9)	0	0	0	0	0	0	0	0	0	0	0	0	0	0	0	0	0	0	1	0	0	0		0
BoCo 2 (9)	0	0	0	0	0	0	0	0	0	0	0	0	0	0	0	0	0	0	0	1	0	0		0
		W0	-50.1818			Calculation of the bending moments
		hk2M0	-126.818
		W1	2.77556e-15		Position		FDM			Position		FDM	Exact	Difference %
		hk2M1	-72.7273		0	M1 =	-72.7273			0	M1 =	-72.7273	-74.4186	-2.32558
		W2	106.909		1	M2 =	-28.6364			2	M3 =	5.45455	4.18605	23.2558
		hk2M2	-28.6364		2	M3 =	5.45455			4	M5 =	43.6364	42.7907	1.93798
		W3	226.455		3	M4 =	29.5455			6	M7 =	41.8182	41.3953	1.01112
		hk2M3	5.45455		4	M5 =	43.6364			8	M9 =	7.05887e-17	0
		W4	324.545		5	M6 =	47.7273
		hk2M4	29.5455		6	M7 =	41.8182
		W5	377.091		7	M8 =	25.9091
		hk2M5	43.6364		8	M9 =	7.05887e-17
		W6	370
		hk2M6	47.7273
		W7	299.182
		hk2M7	41.8182
		W8	170.545
		hk2M8	25.9091
		W9	0
		hk2M9	7.05887e-17
		W10	-186.545
		hk2M10	-35.9091
		M-W FDM approximation
		Thirteen-point grid
		Distributed load q(x) =	10	kN/m
		hk =	0.666667	m		The governing equations
		a = EI/kGAl²=	0.025
		blk =	0.0833333
	W0	hk2M0	W1	hk2M1	W2	hk2M2	W3	hk2M3	W4	hk2M4	W5	hk2M5	W6	hk2M6	W7	hk2M7	W8	hk2M8	W9	hk2M9	W10	hk2M10	W11	hk2M11	W12	hk2M12	W13	hk2M13	W14	hk2M14
Gov Eq 1 (1)	0	1	0	-2	0	1	0	0	0	0	0	0	0	0	0	0	0	0	0	0	0	0	0	0	0	0	0	0	0	0		-1.97531
Gov Eq 2 (1)	1	-3.6	-2	8.2	1	-3.6	0	0	0	0	0	0	0	0	0	0	0	0	0	0	0	0	0	0	0	0	0	0	0	0		0
Gov Eq 1 (2)	0	0	0	1	0	-2	0	1	0	0	0	0	0	0	0	0	0	0	0	0	0	0	0	0	0	0	0	0	0	0		-1.97531
Gov Eq 2 (2)	0	0	1	-3.6	-2	8.2	1	-3.6	0	0	0	0	0	0	0	0	0	0	0	0	0	0	0	0	0	0	0	0	0	0		0
Gov Eq 1 (3)	0	0	0	0	0	1	0	-2	0	1	0	0	0	0	0	0	0	0	0	0	0	0	0	0	0	0	0	0	0	0		-1.97531
Gov Eq 2 (3)	0	0	0	0	1	-3.6	-2	8.2	1	-3.6	0	0	0	0	0	0	0	0	0	0	0	0	0	0	0	0	0	0	0	0		0
Gov Eq 1 (4)	0	0	0	0	0	0	0	1	0	-2	0	1	0	0	0	0	0	0	0	0	0	0	0	0	0	0	0	0	0	0		-1.97531
Gov Eq 2 (4)	0	0	0	0	0	0	1	-3.6	-2	8.2	1	-3.6	0	0	0	0	0	0	0	0	0	0	0	0	0	0	0	0	0	0		0
Gov Eq 1 (5)	0	0	0	0	0	0	0	0	0	1	0	-2	0	1	0	0	0	0	0	0	0	0	0	0	0	0	0	0	0	0		-1.97531
Gov Eq 2 (5)	0	0	0	0	0	0	0	0	1	-3.6	-2	8.2	1	-3.6	0	0	0	0	0	0	0	0	0	0	0	0	0	0	0	0		0
Gov Eq 1 (6)	0	0	0	0	0	0	0	0	0	0	0	1	0	-2	0	1	0	0	0	0	0	0	0	0	0	0	0	0	0	0		-1.97531
Gov Eq 2 (6)	0	0	0	0	0	0	0	0	0	0	1	-3.6	-2	8.2	1	-3.6	0	0	0	0	0	0	0	0	0	0	0	0	0	0		0
Gov Eq 1 (7)	0	0	0	0	0	0	0	0	0	0	0	0	0	1	0	-2	0	1	0	0	0	0	0	0	0	0	0	0	0	0		-1.97531
Gov Eq 2 (7)	0	0	0	0	0	0	0	0	0	0	0	0	1	-3.6	-2	8.2	1	-3.6	0	0	0	0	0	0	0	0	0	0	0	0		0
Gov Eq 1 (8)	0	0	0	0	0	0	0	0	0	0	0	0	0	0	0	1	0	-2	0	1	0	0	0	0	0	0	0	0	0	0		-1.97531
Gov Eq 2 (8)	0	0	0	0	0	0	0	0	0	0	0	0	0	0	1	-3.6	-2	8.2	1	-3.6	0	0	0	0	0	0	0	0	0	0		0
Gov Eq 1 (9)	0	0	0	0	0	0	0	0	0	0	0	0	0	0	0	0	0	1	0	-2	0	1	0	0	0	0	0	0	0	0		-1.97531
Gov Eq 2 (9)	0	0	0	0	0	0	0	0	0	0	0	0	0	0	0	0	1	-3.6	-2	8.2	1	-3.6	0	0	0	0	0	0	0	0		0
Gov Eq 1 (10)	0	0	0	0	0	0	0	0	0	0	0	0	0	0	0	0	0	0	0	1	0	-2	0	1	0	0	0	0	0	0		-1.97531
Gov Eq 2 (10)	0	0	0	0	0	0	0	0	0	0	0	0	0	0	0	0	0	0	1	-3.6	-2	8.2	1	-3.6	0	0	0	0	0	0		0
Gov Eq 1 (11)	0	0	0	0	0	0	0	0	0	0	0	0	0	0	0	0	0	0	0	0	0	1	0	-2	0	1	0	0	0	0		-1.97531
Gov Eq 2 (11)	0	0	0	0	0	0	0	0	0	0	0	0	0	0	0	0	0	0	0	0	1	-3.6	-2	8.2	1	-3.6	0	0	0	0		0
Gov Eq 1 (12)	0	0	0	0	0	0	0	0	0	0	0	0	0	0	0	0	0	0	0	0	0	0	0	1	0	-2	0	1	0	0		-1.97531
Gov Eq 2 (12)	0	0	0	0	0	0	0	0	0	0	0	0	0	0	0	0	0	0	0	0	0	0	1	-3.6	-2	8.2	1	-3.6	0	0		0
Gov Eq 1 (13)	0	0	0	0	0	0	0	0	0	0	0	0	0	0	0	0	0	0	0	0	0	0	0	0	0	1	0	-2	0	1		-1.97531
Gov Eq 2 (13)	0	0	0	0	0	0	0	0	0	0	0	0	0	0	0	0	0	0	0	0	0	0	0	0	1	-3.6	-2	8.2	1	-3.6		0
BoCo 1 (1)	0	0	1	0	0	0	0	0	0	0	0	0	0	0	0	0	0	0	0	0	0	0	0	0	0	0	0	0	0	0		0
BoCo 2 (1)	-1.5	5.4	0	0	1.5	-5.4	0	0	0	0	0	0	0	0	0	0	0	0	0	0	0	0	0	0	0	0	0	0	0	0		0
BoCo 1 (13)	0	0	0	0	0	0	0	0	0	0	0	0	0	0	0	0	0	0	0	0	0	0	0	0	0	0	1	0	0	0		0
BoCo 2 (13)	0	0	0	0	0	0	0	0	0	0	0	0	0	0	0	0	0	0	0	0	0	0	0	0	0	0	0	1	0	0		0
		W0	-39.6743			Calculation of the bending moments
		hk2M0	-48.3073
		W1	-1.75443e-15		Position		FDM			Position		FDM	Exact	Difference %
		hk2M1	-32.7395		0	M1 =	-73.6639			0	M1 =	-73.6639	-74.4186	-1.02456
		W2	65.3027		0.66666	M2 =	-43.0808			2	M4 =	4.75209	4.18605	11.9115
		hk2M2	-19.147		1.33332	M3 =	-16.9421			4	M7 =	43.1681	42.7907	0.874174
		W3	142.641		1.99998	M4 =	4.75209			6	M10 =	41.584	41.3953	0.453737
		hk2M3	-7.52983		2.66664	M5 =	22.0019			8	M13 =	-6.47766e-16	0
		W4	220.399		3.3333	M6 =	34.8072
		hk2M4	2.11204		3.99996	M7 =	43.1681
		W5	288.933		4.66662	M8 =	47.0845
		hk2M5	9.7786		5.33328	M9 =	46.5565
		W6	340.577		5.99994	M10 =	41.584
		hk2M6	15.4699		6.6666	M11 =	32.1671
		W7	369.641		7.33326	M12 =	18.3058
		hk2M7	19.1858		7.99992	M13 =	-6.47766e-16
		W8	372.407
		hk2M8	20.9264
		W9	347.136
		hk2M9	20.6918
		W10	294.063
		hk2M10	18.4818
		W11	215.396
		hk2M11	14.2965
		W12	115.321
		hk2M12	8.13591
		W13	0
		hk2M13	-2.87896e-16
		W14	-122.433
		hk2M14	-10.1112

## Sheet: W-FDM approximation
		Uniform fixed-pinned beam subjected to a uniformly distributed load
				Classical Beam Theory
		Distributed load q(x) =	10	kN/m
		Beam length l =	8	m
		a = EI/kGAl²=	0.025
		Moment at fixed end M1 =	-74.4186	kNm
		x[m]	M0(x)	m(x)	M(x)
	Position 1	0	0	1	-74.4186	kNm
	Position 2	2	60	0.75	4.18605	kNm
	Position 3	4	80	0.5	42.7907	kNm
	Position 4	6	60	0.25	41.3953	kNm
	Position 5	8	0	0	0	kNm
		W FDM approximation
		Five-point grid
		Distributed load q(x) =	10	kN/m
		hk =	2	m
		a = EI/kGAl²=	0.025
		blk =	0.25
	W-1	W0	W1	W2	W3	W4	W5	W6	W7
Gov Eq (1)	1	-4	6	-4	1	0	0	0	0		160
Gov Eq (2)	0	1	-4	6	-4	1	0	0	0		160
Gov Eq (3)	0	0	1	-4	6	-4	1	0	0		160
Gov Eq (4)	0	0	0	1	-4	6	-4	1	0		160
Gov Eq (5)	0	0	0	0	1	-4	6	-4	1		160
BoCo 1 (1)	0	0	1	0	0	0	0	0	0		0
BoCo 2 (1)	-0.116667	-0.266667	0	0.266667	0.116667	0	0	0	0		0
BoCo 1 (5)	0	0	0	0	0	0	1	0	0		0
BoCo 2 (5)	0	0	0	0	0.0833333	-1.33333	2.5	-1.33333	0.0833333		64
		W-1	784.372			Calculation of the bending moments
		W0	31.4729		Position	Node	h2M	FDM	Exact	Difference %
		W1	1.41777e-13		0	1	-297.674	-74.4186	-74.4186	-3.81917e-14
		W2	215.535		2	2	16.7442	4.18605	4.18605	5.94093e-13
		W3	363.659		4	3	171.163	42.7907	42.7907	-1.66051e-14
		W4	289.953		6	4	165.581	41.3953	41.3953	1.71648e-14
		W5	-4.79543e-15		8	5	0	0	0
		W6	-340.62
		W7	-406.326
		W FDM approximation
		Three-point grid
		Distributed load q(x) =	10	kN/m
		hk =	4	m
		a = EI/kGAl²=	0.025
		blk =	0.5
	W-1	W0	W1	W2	W3	W4	W5
Gov Eq (1)	1	-4	6	-4	1	0	0		2560
Gov Eq (2)	0	1	-4	6	-4	1	0		2560
Gov Eq (3)	0	0	1	-4	6	-4	1		2560
BoCo 1 (1)	0	0	1	0	0	0	0		0
BoCo 2 (1)	0.0333333	-0.566667	0	0.566667	-0.0333333	0	0		0
BoCo 1 (3)	0	0	0	0	1	0	0		0
BoCo 2 (3)	0	0	0.0833333	-1.33333	2.5	-1.33333	0.0833333		256
	Gov Eq (1)	W-1	7152.12			Calculation of the bending moments
	Gov Eq (2)	W0	784.372		Position	Node	h2M	FDM	Exact	Difference %
	Gov Eq (3)	W1	2.40497e-13		0	1	-1190.7	-74.4186	-74.4186	-3.81917e-14
	BoCo 1 (1)	W2	363.659		4	2	684.651	42.7907	42.7907	1.66051e-14
	BoCo 2 (1)	W3	2.29094e-14		8	3	0	0	0
	BoCo 1 (3)	W4	-406.326
	BoCo 2 (3)	W5	2389.33
		W FDM approximation
		Two-point grid
		Distributed load q(x) =	10	kN/m
		hk =	8	m
		a = EI/kGAl²=	0.025
		blk =	1
	W-1	W0	W1	W2	W3	W4
Gov Eq (1)	1	-4	6	-4	1	0		40960
Gov Eq (2)	0	1	-4	6	-4	1		40960
BoCo 1 (1)	0	0	1	0	0	0		0
BoCo 2 (1)	0.0708333	-0.641667	0	0.641667	-0.0708333	0		0
BoCo 1 (2)	0	0	0	1	0	0		0
BoCo 2 (2)	0	0.0833333	-1.33333	2.5	-1.33333	0.0833333		1024
	Gov Eq (1)	W-1	67179.2			Calculation of the bending moments
	Gov Eq (2)	W0	7152.12		Position	Node	h2M	FDM	Exact	Difference %
	BoCo 1 (1)	W1	1.22354e-12		0	1	-4762.79	-74.4186	-74.4186	9.54792e-14
	BoCo 2 (1)	W2	0		8	2	-1.81899e-12	-2.84217e-14	0
	BoCo 1 (2)	W3	2389.33
	BoCo 2 (2)	W4	43365.2
