# Supplementary material for: Timoshenko Beam Theory:First-Order Analysis, Second-Order Analysis, Stability, and Vibration Analysis Using the Finite Difference Method
Source: Preprints.org preprint supplement (doi:10.20944/preprints202105.0252.v1), 2021-05-11
Supplement: Supplementary file 4 [file Pinned pinned beam subjected to a uniformly distributed load and compressive force.xlsx]

## Sheet: w-fi FDM approximation
		Uniform pinned-pinned beam subjected to a uniformly distributed load and compressive force
				Fogang [6]
		Distributed load q(x) =	10	kN/m
		Beam length l =	8	m
		a = EI/kGAl²=	0.025
		Coefficient of axial force k =	-3
			1.8009
		x[m]	M(x)
	Position 1	0	0	kNm
	Position 2	1	54.6809	kNm
	Position 3	2	95.8373	kNm
	Position 4	3	121.392	kNm
	Position 5	4	130.056	kNm
			W-F FDM approximation
				Nine-point grid
		Distributed load q(x) =	10	kN/m
		hk =	1	m		The governing equations
		a = EI/kGAl²=	0.025
		blk =	0.125
			-0.046875
	W0	hkF0	W1	hkF1	W2	hkF2	W3	hkF3	W4	hkF4	W5	hkF5	W6	hkF6	W7	hkF7	W8	hkF8	W9	hkF9	W10	hkF10
Gov Eq 1 (1)	0.578125	0.3125	-1.15625	0	0.578125	-0.3125	0	0	0	0	0	0	0	0	0	0	0	0	0	0	0	0		-10
Gov Eq 2 (1)	-0.3125	1	0	-2.625	0.3125	1	0	0	0	0	0	0	0	0	0	0	0	0	0	0	0	0		0
Gov Eq 1 (2)	0	0	0.578125	0.3125	-1.15625	0	0.578125	-0.3125	0	0	0	0	0	0	0	0	0	0	0	0	0	0		-10
Gov Eq 2 (2)	0	0	-0.3125	1	0	-2.625	0.3125	1	0	0	0	0	0	0	0	0	0	0	0	0	0	0		0
Gov Eq 1 (3)	0	0	0	0	0.578125	0.3125	-1.15625	0	0.578125	-0.3125	0	0	0	0	0	0	0	0	0	0	0	0		-10
Gov Eq 2 (3)	0	0	0	0	-0.3125	1	0	-2.625	0.3125	1	0	0	0	0	0	0	0	0	0	0	0	0		0
Gov Eq 1 (4)	0	0	0	0	0	0	0.578125	0.3125	-1.15625	0	0.578125	-0.3125	0	0	0	0	0	0	0	0	0	0		-10
Gov Eq 2 (4)	0	0	0	0	0	0	-0.3125	1	0	-2.625	0.3125	1	0	0	0	0	0	0	0	0	0	0		0
Gov Eq 1 (5)	0	0	0	0	0	0	0	0	0.578125	0.3125	-1.15625	0	0.578125	-0.3125	0	0	0	0	0	0	0	0		-10
Gov Eq 2 (5)	0	0	0	0	0	0	0	0	-0.3125	1	0	-2.625	0.3125	1	0	0	0	0	0	0	0	0		0
Gov Eq 1 (6)	0	0	0	0	0	0	0	0	0	0	0.578125	0.3125	-1.15625	0	0.578125	-0.3125	0	0	0	0	0	0		-10
Gov Eq 2 (6)	0	0	0	0	0	0	0	0	0	0	-0.3125	1	0	-2.625	0.3125	1	0	0	0	0	0	0		0
Gov Eq 1 (7)	0	0	0	0	0	0	0	0	0	0	0	0	0.578125	0.3125	-1.15625	0	0.578125	-0.3125	0	0	0	0		-10
Gov Eq 2 (7)	0	0	0	0	0	0	0	0	0	0	0	0	-0.3125	1	0	-2.625	0.3125	1	0	0	0	0		0
Gov Eq 1 (8)	0	0	0	0	0	0	0	0	0	0	0	0	0	0	0.578125	0.3125	-1.15625	0	0.578125	-0.3125	0	0		-10
Gov Eq 2 (8)	0	0	0	0	0	0	0	0	0	0	0	0	0	0	-0.3125	1	0	-2.625	0.3125	1	0	0		0
Gov Eq 1 (9)	0	0	0	0	0	0	0	0	0	0	0	0	0	0	0	0	0.578125	0.3125	-1.15625	0	0.578125	-0.3125		-10
Gov Eq 2 (9)	0	0	0	0	0	0	0	0	0	0	0	0	0	0	0	0	-0.3125	1	0	-2.625	0.3125	1		0
BoCo 1 (1)	0	0	1	0	0	0	0	0	0	0	0	0	0	0	0	0	0	0	0	0	0	0		0
BoCo 2 (1)	0	-1	0	0	0	1	0	0	0	0	0	0	0	0	0	0	0	0	0	0	0	0		0
BoCo 1 (9)	0	0	0	0	0	0	0	0	0	0	0	0	0	0	0	0	0	0	1	0	0	0		0
BoCo 2 (9)	0	0	0	0	0	0	0	0	0	0	0	0	0	0	0	0	0	-1	0	0	0	1		0
		W0	-370.499			Calculation of the bending moments
		hkF0	258.395		Position		FDM	Fogang [ ]	Difference %
		W1	0		0	M1 =	0	0	#DIV/0!
		hkF1	283.027		1	M2 =	44.106	54.6809	-23.9762
		W2	353.201		2	M3 =	77.0513	95.8373	-24.3812
		hkF2	258.395		3	M4 =	97.4077	121.392	-24.623
		W3	641.423		4	M5 =	104.293	130.056	-24.7033
		hkF3	194.815
		W4	829.049
		hkF4	104.293
		W5	894.072
		hkF5	-1.9984e-14
		W6	829.049
		hkF6	-104.293
		W7	641.423
		hkF7	-194.815
		W8	353.201
		hkF8	-258.395
		W9	0
		hkF9	-283.027
		W10	-370.499
		hkF10	-258.395
			W-F FDM approximation
				Seventeen-point grid
		Distributed load q(x) =	10	kN/m
		hk =	0.5	m		The governing equations
		a = EI/kGAl²=	0.025
		blk =	0.0625
			-0.0117188
	W0	hkF0	W1	hkF1	W2	hkF2	W3	hkF3	W4	hkF4	W5	hkF5	W6	hkF6	W7	hkF7	W8	hkF8	W9	hkF9	W10	hkF10	W11	hkF11	W12	hkF12	W13	hkF13	W14	hkF14	W15	hkF15	W16	hkF16	W17	hkF17	W18	hkF18
Gov Eq 1 (1)	0.144531	0.078125	-0.289062	0	0.144531	-0.078125	0	0	0	0	0	0	0	0	0	0	0	0	0	0	0	0	0	0	0	0	0	0	0	0	0	0	0	0	0	0	0	0		-0.625
Gov Eq 2 (1)	-0.078125	1	0	-2.15625	0.078125	1	0	0	0	0	0	0	0	0	0	0	0	0	0	0	0	0	0	0	0	0	0	0	0	0	0	0	0	0	0	0	0	0		0
Gov Eq 1 (2)	0	0	0.144531	0.078125	-0.289062	0	0.144531	-0.078125	0	0	0	0	0	0	0	0	0	0	0	0	0	0	0	0	0	0	0	0	0	0	0	0	0	0	0	0	0	0		-0.625
Gov Eq 2 (2)	0	0	-0.078125	1	0	-2.15625	0.078125	1	0	0	0	0	0	0	0	0	0	0	0	0	0	0	0	0	0	0	0	0	0	0	0	0	0	0	0	0	0	0		0
Gov Eq 1 (3)	0	0	0	0	0.144531	0.078125	-0.289062	0	0.144531	-0.078125	0	0	0	0	0	0	0	0	0	0	0	0	0	0	0	0	0	0	0	0	0	0	0	0	0	0	0	0		-0.625
Gov Eq 2 (3)	0	0	0	0	-0.078125	1	0	-2.15625	0.078125	1	0	0	0	0	0	0	0	0	0	0	0	0	0	0	0	0	0	0	0	0	0	0	0	0	0	0	0	0		0
Gov Eq 1 (4)	0	0	0	0	0	0	0.144531	0.078125	-0.289062	0	0.144531	-0.078125	0	0	0	0	0	0	0	0	0	0	0	0	0	0	0	0	0	0	0	0	0	0	0	0	0	0		-0.625
Gov Eq 2 (4)	0	0	0	0	0	0	-0.078125	1	0	-2.15625	0.078125	1	0	0	0	0	0	0	0	0	0	0	0	0	0	0	0	0	0	0	0	0	0	0	0	0	0	0		0
Gov Eq 1 (5)	0	0	0	0	0	0	0	0	0.144531	0.078125	-0.289062	0	0.144531	-0.078125	0	0	0	0	0	0	0	0	0	0	0	0	0	0	0	0	0	0	0	0	0	0	0	0		-0.625
Gov Eq 2 (5)	0	0	0	0	0	0	0	0	-0.078125	1	0	-2.15625	0.078125	1	0	0	0	0	0	0	0	0	0	0	0	0	0	0	0	0	0	0	0	0	0	0	0	0		0
Gov Eq 1 (6)	0	0	0	0	0	0	0	0	0	0	0.144531	0.078125	-0.289062	0	0.144531	-0.078125	0	0	0	0	0	0	0	0	0	0	0	0	0	0	0	0	0	0	0	0	0	0		-0.625
Gov Eq 2 (6)	0	0	0	0	0	0	0	0	0	0	-0.078125	1	0	-2.15625	0.078125	1	0	0	0	0	0	0	0	0	0	0	0	0	0	0	0	0	0	0	0	0	0	0		0
Gov Eq 1 (7)	0	0	0	0	0	0	0	0	0	0	0	0	0.144531	0.078125	-0.289062	0	0.144531	-0.078125	0	0	0	0	0	0	0	0	0	0	0	0	0	0	0	0	0	0	0	0		-0.625
Gov Eq 2 (7)	0	0	0	0	0	0	0	0	0	0	0	0	-0.078125	1	0	-2.15625	0.078125	1	0	0	0	0	0	0	0	0	0	0	0	0	0	0	0	0	0	0	0	0		0
Gov Eq 1 (8)	0	0	0	0	0	0	0	0	0	0	0	0	0	0	0.144531	0.078125	-0.289062	0	0.144531	-0.078125	0	0	0	0	0	0	0	0	0	0	0	0	0	0	0	0	0	0		-0.625
Gov Eq 2 (8)	0	0	0	0	0	0	0	0	0	0	0	0	0	0	-0.078125	1	0	-2.15625	0.078125	1	0	0	0	0	0	0	0	0	0	0	0	0	0	0	0	0	0	0		0
Gov Eq 1 (9)	0	0	0	0	0	0	0	0	0	0	0	0	0	0	0	0	0.144531	0.078125	-0.289062	0	0.144531	-0.078125	0	0	0	0	0	0	0	0	0	0	0	0	0	0	0	0		-0.625
Gov Eq 2 (9)	0	0	0	0	0	0	0	0	0	0	0	0	0	0	0	0	-0.078125	1	0	-2.15625	0.078125	1	0	0	0	0	0	0	0	0	0	0	0	0	0	0	0	0		0
Gov Eq 1 (10)	0	0	0	0	0	0	0	0	0	0	0	0	0	0	0	0	0	0	0.144531	0.078125	-0.289062	0	0.144531	-0.078125	0	0	0	0	0	0	0	0	0	0	0	0	0	0		-0.625
Gov Eq 2 (10)	0	0	0	0	0	0	0	0	0	0	0	0	0	0	0	0	0	0	-0.078125	1	0	-2.15625	0.078125	1	0	0	0	0	0	0	0	0	0	0	0	0	0	0		0
Gov Eq 1 (11)	0	0	0	0	0	0	0	0	0	0	0	0	0	0	0	0	0	0	0	0	0.144531	0.078125	-0.289062	0	0.144531	-0.078125	0	0	0	0	0	0	0	0	0	0	0	0		-0.625
Gov Eq 2 (11)	0	0	0	0	0	0	0	0	0	0	0	0	0	0	0	0	0	0	0	0	-0.078125	1	0	-2.15625	0.078125	1	0	0	0	0	0	0	0	0	0	0	0	0		0
Gov Eq 1 (12)	0	0	0	0	0	0	0	0	0	0	0	0	0	0	0	0	0	0	0	0	0	0	0.144531	0.078125	-0.289062	0	0.144531	-0.078125	0	0	0	0	0	0	0	0	0	0		-0.625
Gov Eq 2 (12)	0	0	0	0	0	0	0	0	0	0	0	0	0	0	0	0	0	0	0	0	0	0	-0.078125	1	0	-2.15625	0.078125	1	0	0	0	0	0	0	0	0	0	0		0
Gov Eq 1 (13)	0	0	0	0	0	0	0	0	0	0	0	0	0	0	0	0	0	0	0	0	0	0	0	0	0.144531	0.078125	-0.289062	0	0.144531	-0.078125	0	0	0	0	0	0	0	0		-0.625
Gov Eq 2 (13)	0	0	0	0	0	0	0	0	0	0	0	0	0	0	0	0	0	0	0	0	0	0	0	0	-0.078125	1	0	-2.15625	0.078125	1	0	0	0	0	0	0	0	0		0
Gov Eq 1 (14)	0	0	0	0	0	0	0	0	0	0	0	0	0	0	0	0	0	0	0	0	0	0	0	0	0	0	0.144531	0.078125	-0.289062	0	0.144531	-0.078125	0	0	0	0	0	0		-0.625
Gov Eq 2 (14)	0	0	0	0	0	0	0	0	0	0	0	0	0	0	0	0	0	0	0	0	0	0	0	0	0	0	-0.078125	1	0	-2.15625	0.078125	1	0	0	0	0	0	0		0
Gov Eq 1 (15)	0	0	0	0	0	0	0	0	0	0	0	0	0	0	0	0	0	0	0	0	0	0	0	0	0	0	0	0	0.144531	0.078125	-0.289062	0	0.144531	-0.078125	0	0	0	0		-0.625
Gov Eq 2 (15)	0	0	0	0	0	0	0	0	0	0	0	0	0	0	0	0	0	0	0	0	0	0	0	0	0	0	0	0	-0.078125	1	0	-2.15625	0.078125	1	0	0	0	0		0
Gov Eq 1 (16)	0	0	0	0	0	0	0	0	0	0	0	0	0	0	0	0	0	0	0	0	0	0	0	0	0	0	0	0	0	0	0.144531	0.078125	-0.289062	0	0.144531	-0.078125	0	0		-0.625
Gov Eq 2 (16)	0	0	0	0	0	0	0	0	0	0	0	0	0	0	0	0	0	0	0	0	0	0	0	0	0	0	0	0	0	0	-0.078125	1	0	-2.15625	0.078125	1	0	0		0
Gov Eq 1 (17)	0	0	0	0	0	0	0	0	0	0	0	0	0	0	0	0	0	0	0	0	0	0	0	0	0	0	0	0	0	0	0	0	0.144531	0.078125	-0.289062	0	0.144531	-0.078125		-0.625
Gov Eq 2 (17)	0	0	0	0	0	0	0	0	0	0	0	0	0	0	0	0	0	0	0	0	0	0	0	0	0	0	0	0	0	0	0	0	-0.078125	1	0	-2.15625	0.078125	1		0
BoCo 1 (1)	0	0	1	0	0	0	0	0	0	0	0	0	0	0	0	0	0	0	0	0	0	0	0	0	0	0	0	0	0	0	0	0	0	0	0	0	0	0		0
BoCo 2 (1)	0	-1	0	0	0	1	0	0	0	0	0	0	0	0	0	0	0	0	0	0	0	0	0	0	0	0	0	0	0	0	0	0	0	0	0	0	0	0		0
BoCo 1 (17)	0	0	0	0	0	0	0	0	0	0	0	0	0	0	0	0	0	0	0	0	0	0	0	0	0	0	0	0	0	0	0	0	0	0	1	0	0	0		0
BoCo 2 (17)	0	0	0	0	0	0	0	0	0	0	0	0	0	0	0	0	0	0	0	0	0	0	0	0	0	0	0	0	0	0	0	0	0	-1	0	0	0	1		0
		W0	-210.322			Calculation of the bending moments
		hkF0	158.758		Position		FDM		Position	FDM	Fogang [ ]
		W1	0		0	M1 =	5.68434e-14		0	5.68434e-14	0
		hkF1	162.338		0.5	M2 =	27.2552		1	51.5859	54.6809
		W2	205.998		1	M3 =	51.5859		2	90.3299	95.8373
		hkF2	158.758		1.5	M4 =	72.6963		3	114.354	121.392
		W3	400.305		2	M5 =	90.3299		4	122.493	130.056
		hkF3	148.71		2.5	M6 =	104.272
		W4	576.346		3	M7 =	114.354
		hkF4	132.965		3.5	M8 =	120.452
		W5	728.415		4	M9 =	122.493
		hkF5	112.362
		W6	851.746
		hkF6	87.8003
		W7	942.571
		hkF7	60.2262
		W8	998.166
		hkF8	30.6234
		W9	1016.88
		hkF9	4.82808e-14
		W10	998.166
		hkF10	-30.6234
		W11	942.571
		hkF11	-60.2262
		W12	851.746
		hkF12	-87.8003
		W13	728.415
		hkF13	-112.362
		W14	576.346
		hkF14	-132.965
		W15	400.305
		hkF15	-148.71
		W16	205.998
		hkF16	-158.758
		W17	0
		hkF17	-162.338
		W18	-210.322
		hkF18	-158.758
			W-F FDM approximation
				Twenty five-point grid
		Distributed load q(x) =	10	kN/m
		hk =	0.333333	m		The governing equations
		a = EI/kGAl²=	0.025
		blk =	0.0416667
			-0.00520833
	W0	hkF0	W1	hkF1	W2	hkF2	W3	hkF3	W4	hkF4	W5	hkF5	W6	hkF6	W7	hkF7	W8	hkF8	W9	hkF9	W10	hkF10	W11	hkF11	W12	hkF12	W13	hkF13	W14	hkF14	W15	hkF15	W16	hkF16	W17	hkF17	W18	hkF18	W19	hkF19	W20	hkF20	W21	hkF21	W22	hkF22	W23	hkF23	W24
Gov Eq 1 (1)	0.0642361	0.0347222	-0.128472	0	0.0642361	-0.0347222	0	0	0	0	0	0	0	0	0	0	0	0	0	0	0	0	0	0	0	0	0	0	0	0	0	0	0	0	0	0	0	0	0	0	0	0	0	0	0	0	0	0	0
Gov Eq 2 (1)	-0.0347222	1	0	-2.06944	0.0347222	1	0	0	0	0	0	0	0	0	0	0	0	0	0	0	0	0	0	0	0	0	0	0	0	0	0	0	0	0	0	0	0	0	0	0	0	0	0	0	0	0	0	0	0
Gov Eq 1 (2)	0	0	0.0642361	0.0347222	-0.128472	0	0.0642361	-0.0347222	0	0	0	0	0	0	0	0	0	0	0	0	0	0	0	0	0	0	0	0	0	0	0	0	0	0	0	0	0	0	0	0	0	0	0	0	0	0	0	0	0
Gov Eq 2 (2)	0	0	-0.0347222	1	0	-2.06944	0.0347222	1	0	0	0	0	0	0	0	0	0	0	0	0	0	0	0	0	0	0	0	0	0	0	0	0	0	0	0	0	0	0	0	0	0	0	0	0	0	0	0	0	0
Gov Eq 1 (3)	0	0	0	0	0.0642361	0.0347222	-0.128472	0	0.0642361	-0.0347222	0	0	0	0	0	0	0	0	0	0	0	0	0	0	0	0	0	0	0	0	0	0	0	0	0	0	0	0	0	0	0	0	0	0	0	0	0	0	0
Gov Eq 2 (3)	0	0	0	0	-0.0347222	1	0	-2.06944	0.0347222	1	0	0	0	0	0	0	0	0	0	0	0	0	0	0	0	0	0	0	0	0	0	0	0	0	0	0	0	0	0	0	0	0	0	0	0	0	0	0	0
Gov Eq 1 (4)	0	0	0	0	0	0	0.0642361	0.0347222	-0.128472	0	0.0642361	-0.0347222	0	0	0	0	0	0	0	0	0	0	0	0	0	0	0	0	0	0	0	0	0	0	0	0	0	0	0	0	0	0	0	0	0	0	0	0	0
Gov Eq 2 (4)	0	0	0	0	0	0	-0.0347222	1	0	-2.06944	0.0347222	1	0	0	0	0	0	0	0	0	0	0	0	0	0	0	0	0	0	0	0	0	0	0	0	0	0	0	0	0	0	0	0	0	0	0	0	0	0
Gov Eq 1 (5)	0	0	0	0	0	0	0	0	0.0642361	0.0347222	-0.128472	0	0.0642361	-0.0347222	0	0	0	0	0	0	0	0	0	0	0	0	0	0	0	0	0	0	0	0	0	0	0	0	0	0	0	0	0	0	0	0	0	0	0
Gov Eq 2 (5)	0	0	0	0	0	0	0	0	-0.0347222	1	0	-2.06944	0.0347222	1	0	0	0	0	0	0	0	0	0	0	0	0	0	0	0	0	0	0	0	0	0	0	0	0	0	0	0	0	0	0	0	0	0	0	0
Gov Eq 1 (6)	0	0	0	0	0	0	0	0	0	0	0.0642361	0.0347222	-0.128472	0	0.0642361	-0.0347222	0	0	0	0	0	0	0	0	0	0	0	0	0	0	0	0	0	0	0	0	0	0	0	0	0	0	0	0	0	0	0	0	0
Gov Eq 2 (6)	0	0	0	0	0	0	0	0	0	0	-0.0347222	1	0	-2.06944	0.0347222	1	0	0	0	0	0	0	0	0	0	0	0	0	0	0	0	0	0	0	0	0	0	0	0	0	0	0	0	0	0	0	0	0	0
Gov Eq 1 (7)	0	0	0	0	0	0	0	0	0	0	0	0	0.0642361	0.0347222	-0.128472	0	0.0642361	-0.0347222	0	0	0	0	0	0	0	0	0	0	0	0	0	0	0	0	0	0	0	0	0	0	0	0	0	0	0	0	0	0	0
Gov Eq 2 (7)	0	0	0	0	0	0	0	0	0	0	0	0	-0.0347222	1	0	-2.06944	0.0347222	1	0	0	0	0	0	0	0	0	0	0	0	0	0	0	0	0	0	0	0	0	0	0	0	0	0	0	0	0	0	0	0
Gov Eq 1 (8)	0	0	0	0	0	0	0	0	0	0	0	0	0	0	0.0642361	0.0347222	-0.128472	0	0.0642361	-0.0347222	0	0	0	0	0	0	0	0	0	0	0	0	0	0	0	0	0	0	0	0	0	0	0	0	0	0	0	0	0
Gov Eq 2 (8)	0	0	0	0	0	0	0	0	0	0	0	0	0	0	-0.0347222	1	0	-2.06944	0.0347222	1	0	0	0	0	0	0	0	0	0	0	0	0	0	0	0	0	0	0	0	0	0	0	0	0	0	0	0	0	0
Gov Eq 1 (9)	0	0	0	0	0	0	0	0	0	0	0	0	0	0	0	0	0.0642361	0.0347222	-0.128472	0	0.0642361	-0.0347222	0	0	0	0	0	0	0	0	0	0	0	0	0	0	0	0	0	0	0	0	0	0	0	0	0	0	0
Gov Eq 2 (9)	0	0	0	0	0	0	0	0	0	0	0	0	0	0	0	0	-0.0347222	1	0	-2.06944	0.0347222	1	0	0	0	0	0	0	0	0	0	0	0	0	0	0	0	0	0	0	0	0	0	0	0	0	0	0	0
Gov Eq 1 (10)	0	0	0	0	0	0	0	0	0	0	0	0	0	0	0	0	0	0	0.0642361	0.0347222	-0.128472	0	0.0642361	-0.0347222	0	0	0	0	0	0	0	0	0	0	0	0	0	0	0	0	0	0	0	0	0	0	0	0	0
Gov Eq 2 (10)	0	0	0	0	0	0	0	0	0	0	0	0	0	0	0	0	0	0	-0.0347222	1	0	-2.06944	0.0347222	1	0	0	0	0	0	0	0	0	0	0	0	0	0	0	0	0	0	0	0	0	0	0	0	0	0
Gov Eq 1 (11)	0	0	0	0	0	0	0	0	0	0	0	0	0	0	0	0	0	0	0	0	0.0642361	0.0347222	-0.128472	0	0.0642361	-0.0347222	0	0	0	0	0	0	0	0	0	0	0	0	0	0	0	0	0	0	0	0	0	0	0
Gov Eq 2 (11)	0	0	0	0	0	0	0	0	0	0	0	0	0	0	0	0	0	0	0	0	-0.0347222	1	0	-2.06944	0.0347222	1	0	0	0	0	0	0	0	0	0	0	0	0	0	0	0	0	0	0	0	0	0	0	0
Gov Eq 1 (12)	0	0	0	0	0	0	0	0	0	0	0	0	0	0	0	0	0	0	0	0	0	0	0.0642361	0.0347222	-0.128472	0	0.0642361	-0.0347222	0	0	0	0	0	0	0	0	0	0	0	0	0	0	0	0	0	0	0	0	0
Gov Eq 2 (12)	0	0	0	0	0	0	0	0	0	0	0	0	0	0	0	0	0	0	0	0	0	0	-0.0347222	1	0	-2.06944	0.0347222	1	0	0	0	0	0	0	0	0	0	0	0	0	0	0	0	0	0	0	0	0	0
Gov Eq 1 (13)	0	0	0	0	0	0	0	0	0	0	0	0	0	0	0	0	0	0	0	0	0	0	0	0	0.0642361	0.0347222	-0.128472	0	0.0642361	-0.0347222	0	0	0	0	0	0	0	0	0	0	0	0	0	0	0	0	0	0	0
Gov Eq 2 (13)	0	0	0	0	0	0	0	0	0	0	0	0	0	0	0	0	0	0	0	0	0	0	0	0	-0.0347222	1	0	-2.06944	0.0347222	1	0	0	0	0	0	0	0	0	0	0	0	0	0	0	0	0	0	0	0
Gov Eq 1 (14)	0	0	0	0	0	0	0	0	0	0	0	0	0	0	0	0	0	0	0	0	0	0	0	0	0	0	0.0642361	0.0347222	-0.128472	0	0.0642361	-0.0347222	0	0	0	0	0	0	0	0	0	0	0	0	0	0	0	0	0
Gov Eq 2 (14)	0	0	0	0	0	0	0	0	0	0	0	0	0	0	0	0	0	0	0	0	0	0	0	0	0	0	-0.0347222	1	0	-2.06944	0.0347222	1	0	0	0	0	0	0	0	0	0	0	0	0	0	0	0	0	0
Gov Eq 1 (15)	0	0	0	0	0	0	0	0	0	0	0	0	0	0	0	0	0	0	0	0	0	0	0	0	0	0	0	0	0.0642361	0.0347222	-0.128472	0	0.0642361	-0.0347222	0	0	0	0	0	0	0	0	0	0	0	0	0	0	0
Gov Eq 2 (15)	0	0	0	0	0	0	0	0	0	0	0	0	0	0	0	0	0	0	0	0	0	0	0	0	0	0	0	0	-0.0347222	1	0	-2.06944	0.0347222	1	0	0	0	0	0	0	0	0	0	0	0	0	0	0	0
Gov Eq 1 (16)	0	0	0	0	0	0	0	0	0	0	0	0	0	0	0	0	0	0	0	0	0	0	0	0	0	0	0	0	0	0	0.0642361	0.0347222	-0.128472	0	0.0642361	-0.0347222	0	0	0	0	0	0	0	0	0	0	0	0	0
Gov Eq 2 (16)	0	0	0	0	0	0	0	0	0	0	0	0	0	0	0	0	0	0	0	0	0	0	0	0	0	0	0	0	0	0	-0.0347222	1	0	-2.06944	0.0347222	1	0	0	0	0	0	0	0	0	0	0	0	0	0
Gov Eq 1 (17)	0	0	0	0	0	0	0	0	0	0	0	0	0	0	0	0	0	0	0	0	0	0	0	0	0	0	0	0	0	0	0	0	0.0642361	0.0347222	-0.128472	0	0.0642361	-0.0347222	0	0	0	0	0	0	0	0	0	0	0
Gov Eq 2 (17)	0	0	0	0	0	0	0	0	0	0	0	0	0	0	0	0	0	0	0	0	0	0	0	0	0	0	0	0	0	0	0	0	-0.0347222	1	0	-2.06944	0.0347222	1	0	0	0	0	0	0	0	0	0	0	0
Gov Eq 1 (18)	0	0	0	0	0	0	0	0	0	0	0	0	0	0	0	0	0	0	0	0	0	0	0	0	0	0	0	0	0	0	0	0	0	0	0.0642361	0.0347222	-0.128472	0	0.0642361	-0.0347222	0	0	0	0	0	0	0	0	0
Gov Eq 2 (18)	0	0	0	0	0	0	0	0	0	0	0	0	0	0	0	0	0	0	0	0	0	0	0	0	0	0	0	0	0	0	0	0	0	0	-0.0347222	1	0	-2.06944	0.0347222	1	0	0	0	0	0	0	0	0	0
Gov Eq 1 (19)	0	0	0	0	0	0	0	0	0	0	0	0	0	0	0	0	0	0	0	0	0	0	0	0	0	0	0	0	0	0	0	0	0	0	0	0	0.0642361	0.0347222	-0.128472	0	0.0642361	-0.0347222	0	0	0	0	0	0	0
Gov Eq 2 (19)	0	0	0	0	0	0	0	0	0	0	0	0	0	0	0	0	0	0	0	0	0	0	0	0	0	0	0	0	0	0	0	0	0	0	0	0	-0.0347222	1	0	-2.06944	0.0347222	1	0	0	0	0	0	0	0
Gov Eq 1 (20)	0	0	0	0	0	0	0	0	0	0	0	0	0	0	0	0	0	0	0	0	0	0	0	0	0	0	0	0	0	0	0	0	0	0	0	0	0	0	0.0642361	0.0347222	-0.128472	0	0.0642361	-0.0347222	0	0	0	0	0
Gov Eq 2 (20)	0	0	0	0	0	0	0	0	0	0	0	0	0	0	0	0	0	0	0	0	0	0	0	0	0	0	0	0	0	0	0	0	0	0	0	0	0	0	-0.0347222	1	0	-2.06944	0.0347222	1	0	0	0	0	0
Gov Eq 1 (21)	0	0	0	0	0	0	0	0	0	0	0	0	0	0	0	0	0	0	0	0	0	0	0	0	0	0	0	0	0	0	0	0	0	0	0	0	0	0	0	0	0.0642361	0.0347222	-0.128472	0	0.0642361	-0.0347222	0	0	0
Gov Eq 2 (21)	0	0	0	0	0	0	0	0	0	0	0	0	0	0	0	0	0	0	0	0	0	0	0	0	0	0	0	0	0	0	0	0	0	0	0	0	0	0	0	0	-0.0347222	1	0	-2.06944	0.0347222	1	0	0	0
Gov Eq 1 (22)	0	0	0	0	0	0	0	0	0	0	0	0	0	0	0	0	0	0	0	0	0	0	0	0	0	0	0	0	0	0	0	0	0	0	0	0	0	0	0	0	0	0	0.0642361	0.0347222	-0.128472	0	0.0642361	-0.0347222	0
Gov Eq 2 (22)	0	0	0	0	0	0	0	0	0	0	0	0	0	0	0	0	0	0	0	0	0	0	0	0	0	0	0	0	0	0	0	0	0	0	0	0	0	0	0	0	0	0	-0.0347222	1	0	-2.06944	0.0347222	1	0
Gov Eq 1 (23)	0	0	0	0	0	0	0	0	0	0	0	0	0	0	0	0	0	0	0	0	0	0	0	0	0	0	0	0	0	0	0	0	0	0	0	0	0	0	0	0	0	0	0	0	0.0642361	0.0347222	-0.128472	0	0.0642361
Gov Eq 2 (23)	0	0	0	0	0	0	0	0	0	0	0	0	0	0	0	0	0	0	0	0	0	0	0	0	0	0	0	0	0	0	0	0	0	0	0	0	0	0	0	0	0	0	0	0	-0.0347222	1	0	-2.06944	0.0347222
Gov Eq 1 (24)	0	0	0	0	0	0	0	0	0	0	0	0	0	0	0	0	0	0	0	0	0	0	0	0	0	0	0	0	0	0	0	0	0	0	0	0	0	0	0	0	0	0	0	0	0	0	0.0642361	0.0347222	-0.128472
Gov Eq 2 (24)	0	0	0	0	0	0	0	0	0	0	0	0	0	0	0	0	0	0	0	0	0	0	0	0	0	0	0	0	0	0	0	0	0	0	0	0	0	0	0	0	0	0	0	0	0	0	-0.0347222	1	0
Gov Eq 1 (25)	0	0	0	0	0	0	0	0	0	0	0	0	0	0	0	0	0	0	0	0	0	0	0	0	0	0	0	0	0	0	0	0	0	0	0	0	0	0	0	0	0	0	0	0	0	0	0	0	0.0642361
Gov Eq 2 (25)	0	0	0	0	0	0	0	0	0	0	0	0	0	0	0	0	0	0	0	0	0	0	0	0	0	0	0	0	0	0	0	0	0	0	0	0	0	0	0	0	0	0	0	0	0	0	0	0	-0.0347222
BoCo 1 (1)	0	0	1	0	0	0	0	0	0	0	0	0	0	0	0	0	0	0	0	0	0	0	0	0	0	0	0	0	0	0	0	0	0	0	0	0	0	0	0	0	0	0	0	0	0	0	0	0	0
BoCo 2 (1)	0	-1	0	0	0	1	0	0	0	0	0	0	0	0	0	0	0	0	0	0	0	0	0	0	0	0	0	0	0	0	0	0	0	0	0	0	0	0	0	0	0	0	0	0	0	0	0	0	0
BoCo 1 (25)	0	0	0	0	0	0	0	0	0	0	0	0	0	0	0	0	0	0	0	0	0	0	0	0	0	0	0	0	0	0	0	0	0	0	0	0	0	0	0	0	0	0	0	0	0	0	0	0	0
BoCo 2 (25)	0	0	0	0	0	0	0	0	0	0	0	0	0	0	0	0	0	0	0	0	0	0	0	0	0	0	0	0	0	0	0	0	0	0	0	0	0	0	0	0	0	0	0	0	0	0	0	0	0
	Gov Eq 1 (1)	W0	-143.807			Calculation of the bending moments
	Gov Eq 2 (1)	hkF0	110.252		Position		FDM		Position	FDM	Fogang [ ]
	Gov Eq 1 (2)	W1	0		0	M1 =	0		0	0	0
	Gov Eq 2 (2)	hkF1	111.346		0.33333	M2 =	19.0707		1	53.2604	54.6809
	Gov Eq 1 (3)	W2	141.885		0.66666	M3 =	36.8569		2	93.3087	95.8373
	Gov Eq 2 (3)	hkF2	110.252		0.99999	M4 =	53.2604		3	118.16	121.392
	Gov Eq 1 (4)	W3	279.557		1.33332	M5 =	68.1904		4	126.583	130.056
	Gov Eq 2 (4)	hkF3	107.108		1.66665	M6 =	81.5645
	Gov Eq 1 (5)	W4	410.881		1.99998	M7 =	93.3087
	Gov Eq 2 (5)	hkF4	102.062		2.33331	M8 =	103.358
	Gov Eq 1 (6)	W5	533.884		2.66664	M9 =	111.657
	Gov Eq 2 (6)	hkF5	95.2725		2.99997	M10 =	118.16
	Gov Eq 1 (7)	W6	646.775		3.3333	M11 =	122.831
	Gov Eq 2 (7)	hkF6	86.9085		3.66663	M12 =	125.644
	Gov Eq 1 (8)	W7	747.946		3.99996	M13 =	126.583
	Gov Eq 2 (8)	hkF7	77.1471
	Gov Eq 1 (9)	W8	835.987
	Gov Eq 2 (9)	hkF8	66.1732
	Gov Eq 1 (10)	W9	909.691
	Gov Eq 2 (10)	hkF9	54.1786
	Gov Eq 1 (11)	W10	968.06
	Gov Eq 2 (11)	hkF10	41.3605
	Gov Eq 1 (12)	W11	1010.31
	Gov Eq 2 (12)	hkF11	27.9208
	Gov Eq 1 (13)	W12	1035.89
	Gov Eq 2 (13)	hkF12	14.0648
	Gov Eq 1 (14)	W13	1044.46
	Gov Eq 2 (14)	hkF13	1.11192e-13
	Gov Eq 1 (15)	W14	1035.89
	Gov Eq 2 (15)	hkF14	-14.0648
	Gov Eq 1 (16)	W15	1010.31
	Gov Eq 2 (16)	hkF15	-27.9208
	Gov Eq 1 (17)	W16	968.06
	Gov Eq 2 (17)	hkF16	-41.3605
	Gov Eq 1 (18)	W17	909.691
	Gov Eq 2 (18)	hkF17	-54.1786
	Gov Eq 1 (19)	W18	835.987
	Gov Eq 2 (19)	hkF18	-66.1732
	Gov Eq 1 (20)	W19	747.946
	Gov Eq 2 (20)	hkF19	-77.1471
	Gov Eq 1 (21)	W20	646.775
	Gov Eq 2 (21)	hkF20	-86.9085
	Gov Eq 1 (22)	W21	533.884
	Gov Eq 2 (22)	hkF21	-95.2725
	Gov Eq 1 (23)	W22	410.881
	Gov Eq 2 (23)	hkF22	-102.062
	Gov Eq 1 (24)	W23	279.557
	Gov Eq 2 (24)	hkF23	-107.108
	Gov Eq 1 (25)	W24	141.885
	Gov Eq 2 (25)	hkF24	-110.252
	BoCo 1 (1)	W25	0
	BoCo 2 (1)	hkF25	-111.346
	BoCo 1 (25)	W26	-143.807
	BoCo 2 (25)	hkF26	-110.252
[truncated: 6 more columns]

## Sheet: W FDM approximation
		Uniform pinned-pinned beam subjected to a uniformly distributed load and compressive force
				Fogang [6]
		Distributed load q(x) =	10	kN/m
		Beam length l =	8	m
		a = EI/kGAl²=	0.025
		Coefficient of axial force k =	-3
			1.8009
		x[m]	M(x)
	Position 1	0	0	kNm
	Position 2	1	54.6809	kNm
	Position 3	2	95.8373	kNm
	Position 4	3	121.392	kNm
	Position 5	4	130.056	kNm
			W FDM approximation
			Nine-point grid
		Distributed load q(x) =	10	kN/m
		hk =	1	m		The governing equation
		a = EI/kGAl²=	0.025
		blk =	0.125
		Coefficient of axial force k =	-3
			-0.046875
	W-1	W0	W1	W2	W3	W4	W5	W6	W7	W8	W9	W10	W11
Gov Eq (1)	0.921094	-3.6375	5.43281	-3.6375	0.921094	0	0	0	0	0	0	0	0		10
Gov Eq (2)	0	0.921094	-3.6375	5.43281	-3.6375	0.921094	0	0	0	0	0	0	0		10
Gov Eq (3)	0	0	0.921094	-3.6375	5.43281	-3.6375	0.921094	0	0	0	0	0	0		10
Gov Eq (4)	0	0	0	0.921094	-3.6375	5.43281	-3.6375	0.921094	0	0	0	0	0		10
Gov Eq (5)	0	0	0	0	0.921094	-3.6375	5.43281	-3.6375	0.921094	0	0	0	0		10
Gov Eq (6)	0	0	0	0	0	0.921094	-3.6375	5.43281	-3.6375	0.921094	0	0	0		10
Gov Eq (7)	0	0	0	0	0	0	0.921094	-3.6375	5.43281	-3.6375	0.921094	0	0		10
Gov Eq (8)	0	0	0	0	0	0	0	0.921094	-3.6375	5.43281	-3.6375	0.921094	0		10
Gov Eq (9)	0	0	0	0	0	0	0	0	0.921094	-3.6375	5.43281	-3.6375	0.921094		10
BoCo 1 (1)	0	0	1	0	0	0	0	0	0	0	0	0	0		0
BoCo 2 (1)	0.0770833	-1.23333	2.3125	-1.23333	0.0770833	0	0	0	0	0	0	0	0		16
BoCo 1 (9)	0	0	0	0	0	0	0	0	0	0	1	0	0		0
BoCo 2 (9)	0	0	0	0	0	0	0	0	0.0770833	-1.23333	2.3125	-1.23333	0.0770833		16
		W-1	-826.617			Calculation of the bending moments
		W0	-440.79		Position		FDM	Fogang [ ]	Difference %
		W1	6.30769e-15		0	M1 =	-2.30926e-14	0	100
		W2	424.467		1	M2 =	55.3635	54.6809	1.23288
		W3	773.011		2	M3 =	97.0529	95.8373	1.25245
		W4	1000.75		3	M4 =	122.946	121.392	1.26409
		W5	1079.82		4	M5 =	131.727	130.056	1.26796
		W6	1000.75
		W7	773.011
		W8	424.467
		W9	0
		W10	-440.79
		W11	-826.617
			W FDM approximation
			Seventeen-point grid
		Distributed load q(x) =	10	kN/m
		hk =	0.5	m		The governing equation
		a = EI/kGAl²=	0.025
		blk =	0.0625
		Coefficient of axial force k =	-3
			-0.0117188
	W-1	W0	W1	W2	W3	W4	W5	W6	W7	W8	W9	W10	W11	W12	W13	W14	W15	W16	W17	W18	W19
Gov Eq (1)	0.924023	-3.68438	5.5207	-3.68438	0.924023	0	0	0	0	0	0	0	0	0	0	0	0	0	0	0	0		0.625
Gov Eq (2)	0	0.924023	-3.68438	5.5207	-3.68438	0.924023	0	0	0	0	0	0	0	0	0	0	0	0	0	0	0		0.625
Gov Eq (3)	0	0	0.924023	-3.68438	5.5207	-3.68438	0.924023	0	0	0	0	0	0	0	0	0	0	0	0	0	0		0.625
Gov Eq (4)	0	0	0	0.924023	-3.68438	5.5207	-3.68438	0.924023	0	0	0	0	0	0	0	0	0	0	0	0	0		0.625
Gov Eq (5)	0	0	0	0	0.924023	-3.68438	5.5207	-3.68438	0.924023	0	0	0	0	0	0	0	0	0	0	0	0		0.625
Gov Eq (6)	0	0	0	0	0	0.924023	-3.68438	5.5207	-3.68438	0.924023	0	0	0	0	0	0	0	0	0	0	0		0.625
Gov Eq (7)	0	0	0	0	0	0	0.924023	-3.68438	5.5207	-3.68438	0.924023	0	0	0	0	0	0	0	0	0	0		0.625
Gov Eq (8)	0	0	0	0	0	0	0	0.924023	-3.68438	5.5207	-3.68438	0.924023	0	0	0	0	0	0	0	0	0		0.625
Gov Eq (9)	0	0	0	0	0	0	0	0	0.924023	-3.68438	5.5207	-3.68438	0.924023	0	0	0	0	0	0	0	0		0.625
Gov Eq (10)	0	0	0	0	0	0	0	0	0	0.924023	-3.68438	5.5207	-3.68438	0.924023	0	0	0	0	0	0	0		0.625
Gov Eq (11)	0	0	0	0	0	0	0	0	0	0	0.924023	-3.68438	5.5207	-3.68438	0.924023	0	0	0	0	0	0		0.625
Gov Eq (12)	0	0	0	0	0	0	0	0	0	0	0	0.924023	-3.68438	5.5207	-3.68438	0.924023	0	0	0	0	0		0.625
Gov Eq (13)	0	0	0	0	0	0	0	0	0	0	0	0	0.924023	-3.68438	5.5207	-3.68438	0.924023	0	0	0	0		0.625
Gov Eq (14)	0	0	0	0	0	0	0	0	0	0	0	0	0	0.924023	-3.68438	5.5207	-3.68438	0.924023	0	0	0		0.625
Gov Eq (15)	0	0	0	0	0	0	0	0	0	0	0	0	0	0	0.924023	-3.68438	5.5207	-3.68438	0.924023	0	0		0.625
Gov Eq (16)	0	0	0	0	0	0	0	0	0	0	0	0	0	0	0	0.924023	-3.68438	5.5207	-3.68438	0.924023	0		0.625
Gov Eq (17)	0	0	0	0	0	0	0	0	0	0	0	0	0	0	0	0	0.924023	-3.68438	5.5207	-3.68438	0.924023		0.625
BoCo 1 (1)	0	0	1	0	0	0	0	0	0	0	0	0	0	0	0	0	0	0	0	0	0		0
BoCo 2 (1)	0.308333	-4.93333	9.25	-4.93333	0.308333	0	0	0	0	0	0	0	0	0	0	0	0	0	0	0	0		16
BoCo 1 (17)	0	0	0	0	0	0	0	0	0	0	0	0	0	0	0	0	0	0	1	0	0		0
BoCo 2 (17)	0	0	0	0	0	0	0	0	0	0	0	0	0	0	0	0	0.308333	-4.93333	9.25	-4.93333	0.308333		16
		W-1	-437.317			Calculation of the bending moments
		W0	-220.801		Position		FDM		Position	FDM	Fogang [ ]	Difference %
		W1	1.08131e-13		0	M1 =	1.52767e-13		0	1.52767e-13	0	100
		W2	216.538		0.5	M2 =	28.9613		1	54.8498	54.6809	0.307906
		W3	420.993		1	M3 =	54.8498		2	96.1381	95.8373	0.312807
		W4	606.377		1.5	M4 =	77.3371		3	121.777	121.392	0.315723
		W5	766.617		2	M5 =	96.1381		4	130.47	130.056	0.316691
		W6	896.638		2.5	M6 =	111.014
		W7	992.423		3	M7 =	121.777
		W8	1051.07		3.5	M8 =	128.289
		W9	1070.81		4	M9 =	130.47
		W10	1051.07		4.5		128.289
		W11	992.423		5		121.777
		W12	896.638		5.5		111.014
		W13	766.617		6		96.1381
		W14	606.377		6.5		77.3371
		W15	420.993		7		54.8498
		W16	216.538		7.5		28.9613
		W17	0		8		-1.45661e-13
		W18	-220.801		8.5		165.782
		W19	-437.317		9		-2971.89
			W FDM approximation
			Twenty five-point grid
		Distributed load q(x) =	10	kN/m
		hk =	0.333333	m		The governing equation
		a = EI/kGAl²=	0.025
		blk =	0.0416667
		Coefficient of axial force k =	-3
			-0.00520833
	W-1	W0	W1	W2	W3	W4	W5	W6	W7	W8	W9	W10	W11	W12	W13	W14	W15	W16	W17	W18	W19	W20	W21	W22	W23	W24	W25	W26	W27
Gov Eq (1)	0.924566	-3.69306	5.53698	-3.69306	0.924566	0	0	0	0	0	0	0	0	0	0	0	0	0	0	0	0	0	0	0	0	0	0	0	0		0.123457
Gov Eq (2)	0	0.924566	-3.69306	5.53698	-3.69306	0.924566	0	0	0	0	0	0	0	0	0	0	0	0	0	0	0	0	0	0	0	0	0	0	0		0.123457
Gov Eq (3)	0	0	0.924566	-3.69306	5.53698	-3.69306	0.924566	0	0	0	0	0	0	0	0	0	0	0	0	0	0	0	0	0	0	0	0	0	0		0.123457
Gov Eq (4)	0	0	0	0.924566	-3.69306	5.53698	-3.69306	0.924566	0	0	0	0	0	0	0	0	0	0	0	0	0	0	0	0	0	0	0	0	0		0.123457
Gov Eq (5)	0	0	0	0	0.924566	-3.69306	5.53698	-3.69306	0.924566	0	0	0	0	0	0	0	0	0	0	0	0	0	0	0	0	0	0	0	0		0.123457
Gov Eq (6)	0	0	0	0	0	0.924566	-3.69306	5.53698	-3.69306	0.924566	0	0	0	0	0	0	0	0	0	0	0	0	0	0	0	0	0	0	0		0.123457
Gov Eq (7)	0	0	0	0	0	0	0.924566	-3.69306	5.53698	-3.69306	0.924566	0	0	0	0	0	0	0	0	0	0	0	0	0	0	0	0	0	0		0.123457
Gov Eq (8)	0	0	0	0	0	0	0	0.924566	-3.69306	5.53698	-3.69306	0.924566	0	0	0	0	0	0	0	0	0	0	0	0	0	0	0	0	0		0.123457
Gov Eq (9)	0	0	0	0	0	0	0	0	0.924566	-3.69306	5.53698	-3.69306	0.924566	0	0	0	0	0	0	0	0	0	0	0	0	0	0	0	0		0.123457
Gov Eq (10)	0	0	0	0	0	0	0	0	0	0.924566	-3.69306	5.53698	-3.69306	0.924566	0	0	0	0	0	0	0	0	0	0	0	0	0	0	0		0.123457
Gov Eq (11)	0	0	0	0	0	0	0	0	0	0	0.924566	-3.69306	5.53698	-3.69306	0.924566	0	0	0	0	0	0	0	0	0	0	0	0	0	0		0.123457
Gov Eq (12)	0	0	0	0	0	0	0	0	0	0	0	0.924566	-3.69306	5.53698	-3.69306	0.924566	0	0	0	0	0	0	0	0	0	0	0	0	0		0.123457
Gov Eq (13)	0	0	0	0	0	0	0	0	0	0	0	0	0.924566	-3.69306	5.53698	-3.69306	0.924566	0	0	0	0	0	0	0	0	0	0	0	0		0.123457
Gov Eq (14)	0	0	0	0	0	0	0	0	0	0	0	0	0	0.924566	-3.69306	5.53698	-3.69306	0.924566	0	0	0	0	0	0	0	0	0	0	0		0.123457
Gov Eq (15)	0	0	0	0	0	0	0	0	0	0	0	0	0	0	0.924566	-3.69306	5.53698	-3.69306	0.924566	0	0	0	0	0	0	0	0	0	0		0.123457
Gov Eq (16)	0	0	0	0	0	0	0	0	0	0	0	0	0	0	0	0.924566	-3.69306	5.53698	-3.69306	0.924566	0	0	0	0	0	0	0	0	0		0.123457
Gov Eq (17)	0	0	0	0	0	0	0	0	0	0	0	0	0	0	0	0	0.924566	-3.69306	5.53698	-3.69306	0.924566	0	0	0	0	0	0	0	0		0.123457
Gov Eq (18)	0	0	0	0	0	0	0	0	0	0	0	0	0	0	0	0	0	0.924566	-3.69306	5.53698	-3.69306	0.924566	0	0	0	0	0	0	0		0.123457
Gov Eq (19)	0	0	0	0	0	0	0	0	0	0	0	0	0	0	0	0	0	0	0.924566	-3.69306	5.53698	-3.69306	0.924566	0	0	0	0	0	0		0.123457
Gov Eq (20)	0	0	0	0	0	0	0	0	0	0	0	0	0	0	0	0	0	0	0	0.924566	-3.69306	5.53698	-3.69306	0.924566	0	0	0	0	0		0.123457
Gov Eq (21)	0	0	0	0	0	0	0	0	0	0	0	0	0	0	0	0	0	0	0	0	0.924566	-3.69306	5.53698	-3.69306	0.924566	0	0	0	0		0.123457
Gov Eq (22)	0	0	0	0	0	0	0	0	0	0	0	0	0	0	0	0	0	0	0	0	0	0.924566	-3.69306	5.53698	-3.69306	0.924566	0	0	0		0.123457
Gov Eq (23)	0	0	0	0	0	0	0	0	0	0	0	0	0	0	0	0	0	0	0	0	0	0	0.924566	-3.69306	5.53698	-3.69306	0.924566	0	0		0.123457
Gov Eq (24)	0	0	0	0	0	0	0	0	0	0	0	0	0	0	0	0	0	0	0	0	0	0	0	0.924566	-3.69306	5.53698	-3.69306	0.924566	0		0.123457
Gov Eq (25)	0	0	0	0	0	0	0	0	0	0	0	0	0	0	0	0	0	0	0	0	0	0	0	0	0.924566	-3.69306	5.53698	-3.69306	0.924566		0.123457
BoCo 1 (1)	0	0	1	0	0	0	0	0	0	0	0	0	0	0	0	0	0	0	0	0	0	0	0	0	0	0	0	0	0		0
BoCo 2 (1)	0.69375	-11.1	20.8125	-11.1	0.69375	0	0	0	0	0	0	0	0	0	0	0	0	0	0	0	0	0	0	0	0	0	0	0	0		16
BoCo 1 (25)	0	0	0	0	0	0	0	0	0	0	0	0	0	0	0	0	0	0	0	0	0	0	0	0	0	0	1	0	0		0
BoCo 2 (25)	0	0	0	0	0	0	0	0	0	0	0	0	0	0	0	0	0	0	0	0	0	0	0	0	0.69375	-11.1	20.8125	-11.1	0.69375		16
	Gov Eq (1)	W-1	-293.463			Calculation of the bending moments
	Gov Eq (2)	W0	-147.025		Position		FDM		Position	FDM	Fogang [ ]	Difference %
	Gov Eq (3)	W1	9.47242e-14		0	M1 =	3.55271e-14		0	3.55271e-14	0	100
	Gov Eq (4)	W2	145.116		0.3333	M2 =	19.5985		1	54.7559	54.6809	0.136822
	Gov Eq (5)	W3	285.968		0.6666	M3 =	37.8847		2	95.9707	95.8373	0.139
	Gov Eq (6)	W4	420.362		0.9999	M4 =	54.7559		3	121.563	121.392	0.140297
	Gov Eq (7)	W5	546.272		1.3332	M5 =	70.1167		4	130.24	130.056	0.140727
	Gov Eq (8)	W6	661.854		1.6665	M6 =	83.8809
	Gov Eq (9)	W7	765.455		1.9998	M7 =	95.9707
	Gov Eq (10)	W8	855.623		2.3331	M8 =	106.318
	Gov Eq (11)	W9	931.116		2.6664	M9 =	114.865
	Gov Eq (12)	W10	990.909		2.9997	M10 =	121.563
	Gov Eq (13)	W11	1034.2		3.333	M11 =	126.374
	Gov Eq (14)	W12	1060.4		3.6663	M12 =	129.272
	Gov Eq (15)	W13	1069.17		3.9996	M13 =	130.24
	Gov Eq (16)	W14	1060.4		4.3329		129.272
	Gov Eq (17)	W15	1034.2		4.6662		126.374
	Gov Eq (18)	W16	990.909		4.9995		121.563
	Gov Eq (19)	W17	931.116		5.3328		114.865
	Gov Eq (20)	W18	855.623		5.6661		106.318
	Gov Eq (21)	W19	765.455		5.9994		95.9707
	Gov Eq (22)	W20	661.854		6.3327		83.8809
	Gov Eq (23)	W21	546.272		6.666		70.1167
	Gov Eq (24)	W22	420.362		6.9993		54.7559
	Gov Eq (25)	W23	285.968		7.3326		37.8847
	BoCo 1 (1)	W24	145.116		7.6659		19.5985
	BoCo 2 (1)	W25	0		7.9992		3.55271e-14
	BoCo 1 (25)	W26	-147.025
	BoCo 2 (25)	W27	-293.463

## Sheet: M-W FDM approximation
		Uniform pinned-pinned beam subjected to a uniformly distributed load and compressive force
				Fogang [6]
		Distributed load q(x) =	10	kN/m
		Beam length l =	8	m
		a = EI/kGAl²=	0.025
		Coefficient of axial force k =	-3
			1.8009
		x[m]	M(x)
	Position 1	0	0	kNm
	Position 2	1	54.6809	kNm
	Position 3	2	95.8373	kNm
	Position 4	3	121.392	kNm
	Position 5	4	130.056	kNm
			M-W FDM approximation
			Nine-point grid
		Distributed load q(x) =	10	kN/m
		hk =	1	m		The governing equation
		a = EI/kGAl²=	0.025
		blk =	0.125
		Coefficient of axial force k =	-3
			-0.046875
	W0	h²M0	W1	h²M1	W2	h²M2	W3	h²M3	W4	h²M4	W5	h²M5	W6	h²M6	W7	h²M7	W8	h²M8	W9	h²M9	W10	h²M10
Gov Eq 1 (1)	-0.046875	1	0.09375	-2	-0.046875	1	0	0	0	0	0	0	0	0	0	0	0	0	0	0	0	0		-10
Gov Eq 2 (1)	1	-1.6	-2	4.2	1	-1.6	0	0	0	0	0	0	0	0	0	0	0	0	0	0	0	0		-10
Gov Eq 1 (2)	0	0	-0.046875	1	0.09375	-2	-0.046875	1	0	0	0	0	0	0	0	0	0	0	0	0	0	0		-10
Gov Eq 2 (2)	0	0	1	-1.6	-2	4.2	1	-1.6	0	0	0	0	0	0	0	0	0	0	0	0	0	0		-10
Gov Eq 1 (3)	0	0	0	0	-0.046875	1	0.09375	-2	-0.046875	1	0	0	0	0	0	0	0	0	0	0	0	0		-10
Gov Eq 2 (3)	0	0	0	0	1	-1.6	-2	4.2	1	-1.6	0	0	0	0	0	0	0	0	0	0	0	0		-10
Gov Eq 1 (4)	0	0	0	0	0	0	-0.046875	1	0.09375	-2	-0.046875	1	0	0	0	0	0	0	0	0	0	0		-10
Gov Eq 2 (4)	0	0	0	0	0	0	1	-1.6	-2	4.2	1	-1.6	0	0	0	0	0	0	0	0	0	0		-10
Gov Eq 1 (5)	0	0	0	0	0	0	0	0	-0.046875	1	0.09375	-2	-0.046875	1	0	0	0	0	0	0	0	0		-10
Gov Eq 2 (5)	0	0	0	0	0	0	0	0	1	-1.6	-2	4.2	1	-1.6	0	0	0	0	0	0	0	0		-10
Gov Eq 1 (6)	0	0	0	0	0	0	0	0	0	0	-0.046875	1	0.09375	-2	-0.046875	1	0	0	0	0	0	0		-10
Gov Eq 2 (6)	0	0	0	0	0	0	0	0	0	0	1	-1.6	-2	4.2	1	-1.6	0	0	0	0	0	0		-10
Gov Eq 1 (7)	0	0	0	0	0	0	0	0	0	0	0	0	-0.046875	1	0.09375	-2	-0.046875	1	0	0	0	0		-10
Gov Eq 2 (7)	0	0	0	0	0	0	0	0	0	0	0	0	1	-1.6	-2	4.2	1	-1.6	0	0	0	0		-10
Gov Eq 1 (8)	0	0	0	0	0	0	0	0	0	0	0	0	0	0	-0.046875	1	0.09375	-2	-0.046875	1	0	0		-10
Gov Eq 2 (8)	0	0	0	0	0	0	0	0	0	0	0	0	0	0	1	-1.6	-2	4.2	1	-1.6	0	0		-10
Gov Eq 1 (9)	0	0	0	0	0	0	0	0	0	0	0	0	0	0	0	0	-0.046875	1	0.09375	-2	-0.046875	1		-10
Gov Eq 2 (9)	0	0	0	0	0	0	0	0	0	0	0	0	0	0	0	0	1	-1.6	-2	4.2	1	-1.6		-10
Bo Co 1 (1)	0	0	1	0	0	0	0	0	0	0	0	0	0	0	0	0	0	0	0	0	0	0		0
Bo Co 2 (1)	0	0	0	1	0	0	0	0	0	0	0	0	0	0	0	0	0	0	0	0	0	0		0
Bo Co 1 (9)	0	0	0	0	0	0	0	0	0	0	0	0	0	0	0	0	0	0	1	0	0	0		0
Bo Co 2 (9)	0	0	0	0	0	0	0	0	0	0	0	0	0	0	0	0	0	0	0	1	0	0		0
	Gov Eq 1 (1)	W0	-510.233			Calculation of the bending moments
	Gov Eq 2 (1)	h²M0	-68.9172		Position		FDM	Fogang [ ]	Difference %
	Gov Eq 1 (2)	W1	1.70003e-14		0	M1 =	1.70003e-14	0	100
	Gov Eq 2 (2)	h²M1	4.77049e-16		1	M2 =	57.5996	54.6809	5.06717
	Gov Eq 1 (3)	W2	482.125		2	M3 =	100.963	95.8373	5.07655
	Gov Eq 2 (3)	h²M2	57.5996		3	M4 =	127.892	121.392	5.08213
	Gov Eq 1 (4)	W3	873.872		4	M5 =	137.023	130.056	5.08398
	Gov Eq 2 (4)	h²M3	100.963		5	M6 =
	Gov Eq 1 (5)	W4	1128.36		6	M7 =
	Gov Eq 2 (5)	h²M4	127.892		7	M8 =
	Gov Eq 1 (6)	W5	1216.48		8	M9 =
	Gov Eq 2 (6)	h²M5	137.023
	Gov Eq 1 (7)	W6	1128.36
	Gov Eq 2 (7)	h²M6	127.892
	Gov Eq 1 (8)	W7	873.872
	Gov Eq 2 (8)	h²M7	100.963
	Gov Eq 1 (9)	W8	482.125
	Gov Eq 2 (9)	h²M8	57.5996
	Bo Co 1 (1)	W9	0
	Bo Co 2 (1)	h²M9	2.2989e-15
	Bo Co 1 (9)	W10	-510.233
	Bo Co 2 (9)	h²M10	-68.9172
			M-W FDM approximation
			Seventeen-point grid
		Distributed load q(x) =	10	kN/m
		hk =	0.5	m		The governing equation
		a = EI/kGAl²=	0.025
		blk =	0.0625
		Coefficient of axial force k =	-3
			-0.0117188
	W0	h²M0	W1	h²M1	W2	h²M2	W3	h²M3	W4	h²M4	W5	h²M5	W6	h²M6	W7	h²M7	W8	h²M8	W9	h²M9	W10	h²M10	W11	h²M11	W12	h²M12	W13	h²M13	W14	h²M14	W15	h²M15	W16	h²M16	W17	h²M17	W18	h²M18
Gov Eq 1 (1)	-0.0117188	1	0.0234375	-2	-0.0117188	1	0	0	0	0	0	0	0	0	0	0	0	0	0	0	0	0	0	0	0	0	0	0	0	0	0	0	0	0	0	0	0	0		-0.625
Gov Eq 2 (1)	1	-6.4	-2	13.8	1	-6.4	0	0	0	0	0	0	0	0	0	0	0	0	0	0	0	0	0	0	0	0	0	0	0	0	0	0	0	0	0	0	0	0		-0.625
Gov Eq 1 (2)	0	0	-0.0117188	1	0.0234375	-2	-0.0117188	1	0	0	0	0	0	0	0	0	0	0	0	0	0	0	0	0	0	0	0	0	0	0	0	0	0	0	0	0	0	0		-0.625
Gov Eq 2 (2)	0	0	1	-6.4	-2	13.8	1	-6.4	0	0	0	0	0	0	0	0	0	0	0	0	0	0	0	0	0	0	0	0	0	0	0	0	0	0	0	0	0	0		-0.625
Gov Eq 1 (3)	0	0	0	0	-0.0117188	1	0.0234375	-2	-0.0117188	1	0	0	0	0	0	0	0	0	0	0	0	0	0	0	0	0	0	0	0	0	0	0	0	0	0	0	0	0		-0.625
Gov Eq 2 (3)	0	0	0	0	1	-6.4	-2	13.8	1	-6.4	0	0	0	0	0	0	0	0	0	0	0	0	0	0	0	0	0	0	0	0	0	0	0	0	0	0	0	0		-0.625
Gov Eq 1 (4)	0	0	0	0	0	0	-0.0117188	1	0.0234375	-2	-0.0117188	1	0	0	0	0	0	0	0	0	0	0	0	0	0	0	0	0	0	0	0	0	0	0	0	0	0	0		-0.625
Gov Eq 2 (4)	0	0	0	0	0	0	1	-6.4	-2	13.8	1	-6.4	0	0	0	0	0	0	0	0	0	0	0	0	0	0	0	0	0	0	0	0	0	0	0	0	0	0		-0.625
Gov Eq 1 (5)	0	0	0	0	0	0	0	0	-0.0117188	1	0.0234375	-2	-0.0117188	1	0	0	0	0	0	0	0	0	0	0	0	0	0	0	0	0	0	0	0	0	0	0	0	0		-0.625
Gov Eq 2 (5)	0	0	0	0	0	0	0	0	1	-6.4	-2	13.8	1	-6.4	0	0	0	0	0	0	0	0	0	0	0	0	0	0	0	0	0	0	0	0	0	0	0	0		-0.625
Gov Eq 1 (6)	0	0	0	0	0	0	0	0	0	0	-0.0117188	1	0.0234375	-2	-0.0117188	1	0	0	0	0	0	0	0	0	0	0	0	0	0	0	0	0	0	0	0	0	0	0		-0.625
Gov Eq 2 (6)	0	0	0	0	0	0	0	0	0	0	1	-6.4	-2	13.8	1	-6.4	0	0	0	0	0	0	0	0	0	0	0	0	0	0	0	0	0	0	0	0	0	0		-0.625
Gov Eq 1 (7)	0	0	0	0	0	0	0	0	0	0	0	0	-0.0117188	1	0.0234375	-2	-0.0117188	1	0	0	0	0	0	0	0	0	0	0	0	0	0	0	0	0	0	0	0	0		-0.625
Gov Eq 2 (7)	0	0	0	0	0	0	0	0	0	0	0	0	1	-6.4	-2	13.8	1	-6.4	0	0	0	0	0	0	0	0	0	0	0	0	0	0	0	0	0	0	0	0		-0.625
Gov Eq 1 (8)	0	0	0	0	0	0	0	0	0	0	0	0	0	0	-0.0117188	1	0.0234375	-2	-0.0117188	1	0	0	0	0	0	0	0	0	0	0	0	0	0	0	0	0	0	0		-0.625
Gov Eq 2 (8)	0	0	0	0	0	0	0	0	0	0	0	0	0	0	1	-6.4	-2	13.8	1	-6.4	0	0	0	0	0	0	0	0	0	0	0	0	0	0	0	0	0	0		-0.625
Gov Eq 1 (9)	0	0	0	0	0	0	0	0	0	0	0	0	0	0	0	0	-0.0117188	1	0.0234375	-2	-0.0117188	1	0	0	0	0	0	0	0	0	0	0	0	0	0	0	0	0		-0.625
Gov Eq 2 (9)	0	0	0	0	0	0	0	0	0	0	0	0	0	0	0	0	1	-6.4	-2	13.8	1	-6.4	0	0	0	0	0	0	0	0	0	0	0	0	0	0	0	0		-0.625
Gov Eq 1 (10)	0	0	0	0	0	0	0	0	0	0	0	0	0	0	0	0	0	0	-0.0117188	1	0.0234375	-2	-0.0117188	1	0	0	0	0	0	0	0	0	0	0	0	0	0	0		-0.625
Gov Eq 2 (10)	0	0	0	0	0	0	0	0	0	0	0	0	0	0	0	0	0	0	1	-6.4	-2	13.8	1	-6.4	0	0	0	0	0	0	0	0	0	0	0	0	0	0		-0.625
Gov Eq 1 (11)	0	0	0	0	0	0	0	0	0	0	0	0	0	0	0	0	0	0	0	0	-0.0117188	1	0.0234375	-2	-0.0117188	1	0	0	0	0	0	0	0	0	0	0	0	0		-0.625
Gov Eq 2 (11)	0	0	0	0	0	0	0	0	0	0	0	0	0	0	0	0	0	0	0	0	1	-6.4	-2	13.8	1	-6.4	0	0	0	0	0	0	0	0	0	0	0	0		-0.625
Gov Eq 1 (12)	0	0	0	0	0	0	0	0	0	0	0	0	0	0	0	0	0	0	0	0	0	0	-0.0117188	1	0.0234375	-2	-0.0117188	1	0	0	0	0	0	0	0	0	0	0		-0.625
Gov Eq 2 (12)	0	0	0	0	0	0	0	0	0	0	0	0	0	0	0	0	0	0	0	0	0	0	1	-6.4	-2	13.8	1	-6.4	0	0	0	0	0	0	0	0	0	0		-0.625
Gov Eq 1 (13)	0	0	0	0	0	0	0	0	0	0	0	0	0	0	0	0	0	0	0	0	0	0	0	0	-0.0117188	1	0.0234375	-2	-0.0117188	1	0	0	0	0	0	0	0	0		-0.625
Gov Eq 2 (13)	0	0	0	0	0	0	0	0	0	0	0	0	0	0	0	0	0	0	0	0	0	0	0	0	1	-6.4	-2	13.8	1	-6.4	0	0	0	0	0	0	0	0		-0.625
Gov Eq 1 (14)	0	0	0	0	0	0	0	0	0	0	0	0	0	0	0	0	0	0	0	0	0	0	0	0	0	0	-0.0117188	1	0.0234375	-2	-0.0117188	1	0	0	0	0	0	0		-0.625
Gov Eq 2 (14)	0	0	0	0	0	0	0	0	0	0	0	0	0	0	0	0	0	0	0	0	0	0	0	0	0	0	1	-6.4	-2	13.8	1	-6.4	0	0	0	0	0	0		-0.625
Gov Eq 1 (15)	0	0	0	0	0	0	0	0	0	0	0	0	0	0	0	0	0	0	0	0	0	0	0	0	0	0	0	0	-0.0117188	1	0.0234375	-2	-0.0117188	1	0	0	0	0		-0.625
Gov Eq 2 (15)	0	0	0	0	0	0	0	0	0	0	0	0	0	0	0	0	0	0	0	0	0	0	0	0	0	0	0	0	1	-6.4	-2	13.8	1	-6.4	0	0	0	0		-0.625
Gov Eq 1 (16)	0	0	0	0	0	0	0	0	0	0	0	0	0	0	0	0	0	0	0	0	0	0	0	0	0	0	0	0	0	0	-0.0117188	1	0.0234375	-2	-0.0117188	1	0	0		-0.625
Gov Eq 2 (16)	0	0	0	0	0	0	0	0	0	0	0	0	0	0	0	0	0	0	0	0	0	0	0	0	0	0	0	0	0	0	1	-6.4	-2	13.8	1	-6.4	0	0		-0.625
Gov Eq 1 (17)	0	0	0	0	0	0	0	0	0	0	0	0	0	0	0	0	0	0	0	0	0	0	0	0	0	0	0	0	0	0	0	0	-0.0117188	1	0.0234375	-2	-0.0117188	1		-0.625
Gov Eq 2 (17)	0	0	0	0	0	0	0	0	0	0	0	0	0	0	0	0	0	0	0	0	0	0	0	0	0	0	0	0	0	0	0	0	1	-6.4	-2	13.8	1	-6.4		-0.625
Bo Co 1 (1)	0	0	1	0	0	0	0	0	0	0	0	0	0	0	0	0	0	0	0	0	0	0	0	0	0	0	0	0	0	0	0	0	0	0	0	0	0	0		0
Bo Co 2 (1)	0	0	0	1	0	0	0	0	0	0	0	0	0	0	0	0	0	0	0	0	0	0	0	0	0	0	0	0	0	0	0	0	0	0	0	0	0	0		0
Bo Co 1 (17)	0	0	0	0	0	0	0	0	0	0	0	0	0	0	0	0	0	0	0	0	0	0	0	0	0	0	0	0	0	0	0	0	0	0	1	0	0	0		0
Bo Co 2 (17)	0	0	0	0	0	0	0	0	0	0	0	0	0	0	0	0	0	0	0	0	0	0	0	0	0	0	0	0	0	0	0	0	0	0	0	1	0	0		0
		W0	-229.129			Calculation of the bending moments
		h²M0	-7.9976		Position			Position	FDM	Fogang [ ]	Difference %
		W1	-9.1485e-15		0	M1 =		0	7.22987e-14	0	100
		h²M1	1.80747e-14		0.5	M2 =		1	55.4071	54.6809	1.31052
		W2	224.129		1	M3 =		2	97.1124	95.8373	1.31294
		h²M2	7.31401		1.5	M4 =		3	123.009	121.392	1.31438
		W3	435.351		2	M5 =		4	131.789	130.056	1.31486
		h²M3	13.8518		2.5	M6 =
		W4	626.597		3	M7 =
		h²M4	19.5304		3.5	M8 =
		W5	791.73		4	M9 =
		h²M5	24.2781		4.5
		W6	925.617		5
		h²M6	28.0346		5.5
		W7	1024.2		6
		h²M7	30.7523		6.5
		W8	1084.53		7
		h²M8	32.3968		7.5
		W9	1104.84		8
		h²M9	32.9473
		W10	1084.53
		h²M10	32.3968
		W11	1024.2
		h²M11	30.7523
		W12	925.617
		h²M12	28.0346
		W13	791.73
		h²M13	24.2781
		W14	626.597
		h²M14	19.5304
		W15	435.351
		h²M15	13.8518
		W16	224.129
		h²M16	7.31401
		W17	0
		h²M17	-1.29056e-15
		W18	-229.129
		h²M18	-7.9976
			M-W FDM approximation
			Twenty five-point grid
		Distributed load q(x) =	10	kN/m
		hk =	0.333333	m		The governing equation
		a = EI/kGAl²=	0.025
		blk =	0.0416667
		Coefficient of axial force k =	-3
			-0.00520833
	W0	h²M0	W1	h²M1	W2	h²M2	W3	h²M3	W4	h²M4	W5	h²M5	W6	h²M6	W7	h²M7	W8	h²M8	W9	h²M9	W10	h²M10	W11	h²M11	W12	h²M12	W13	h²M13	W14	h²M14	W15	h²M15	W16	h²M16	W17	h²M17	W18	h²M18	W19	h²M19	W20	h²M20	W21	h²M21	W22	h²M22	W23	h²M23	W24
Gov Eq 1 (1)	-0.00520833	1	0.0104167	-2	-0.00520833	1	0	0	0	0	0	0	0	0	0	0	0	0	0	0	0	0	0	0	0	0	0	0	0	0	0	0	0	0	0	0	0	0	0	0	0	0	0	0	0	0	0	0	0
Gov Eq 2 (1)	1	-14.4	-2	29.8	1	-14.4	0	0	0	0	0	0	0	0	0	0	0	0	0	0	0	0	0	0	0	0	0	0	0	0	0	0	0	0	0	0	0	0	0	0	0	0	0	0	0	0	0	0	0
Gov Eq 1 (2)	0	0	-0.00520833	1	0.0104167	-2	-0.00520833	1	0	0	0	0	0	0	0	0	0	0	0	0	0	0	0	0	0	0	0	0	0	0	0	0	0	0	0	0	0	0	0	0	0	0	0	0	0	0	0	0	0
Gov Eq 2 (2)	0	0	1	-14.4	-2	29.8	1	-14.4	0	0	0	0	0	0	0	0	0	0	0	0	0	0	0	0	0	0	0	0	0	0	0	0	0	0	0	0	0	0	0	0	0	0	0	0	0	0	0	0	0
Gov Eq 1 (3)	0	0	0	0	-0.00520833	1	0.0104167	-2	-0.00520833	1	0	0	0	0	0	0	0	0	0	0	0	0	0	0	0	0	0	0	0	0	0	0	0	0	0	0	0	0	0	0	0	0	0	0	0	0	0	0	0
Gov Eq 2 (3)	0	0	0	0	1	-14.4	-2	29.8	1	-14.4	0	0	0	0	0	0	0	0	0	0	0	0	0	0	0	0	0	0	0	0	0	0	0	0	0	0	0	0	0	0	0	0	0	0	0	0	0	0	0
Gov Eq 1 (4)	0	0	0	0	0	0	-0.00520833	1	0.0104167	-2	-0.00520833	1	0	0	0	0	0	0	0	0	0	0	0	0	0	0	0	0	0	0	0	0	0	0	0	0	0	0	0	0	0	0	0	0	0	0	0	0	0
Gov Eq 2 (4)	0	0	0	0	0	0	1	-14.4	-2	29.8	1	-14.4	0	0	0	0	0	0	0	0	0	0	0	0	0	0	0	0	0	0	0	0	0	0	0	0	0	0	0	0	0	0	0	0	0	0	0	0	0
Gov Eq 1 (5)	0	0	0	0	0	0	0	0	-0.00520833	1	0.0104167	-2	-0.00520833	1	0	0	0	0	0	0	0	0	0	0	0	0	0	0	0	0	0	0	0	0	0	0	0	0	0	0	0	0	0	0	0	0	0	0	0
Gov Eq 2 (5)	0	0	0	0	0	0	0	0	1	-14.4	-2	29.8	1	-14.4	0	0	0	0	0	0	0	0	0	0	0	0	0	0	0	0	0	0	0	0	0	0	0	0	0	0	0	0	0	0	0	0	0	0	0
Gov Eq 1 (6)	0	0	0	0	0	0	0	0	0	0	-0.00520833	1	0.0104167	-2	-0.00520833	1	0	0	0	0	0	0	0	0	0	0	0	0	0	0	0	0	0	0	0	0	0	0	0	0	0	0	0	0	0	0	0	0	0
Gov Eq 2 (6)	0	0	0	0	0	0	0	0	0	0	1	-14.4	-2	29.8	1	-14.4	0	0	0	0	0	0	0	0	0	0	0	0	0	0	0	0	0	0	0	0	0	0	0	0	0	0	0	0	0	0	0	0	0
Gov Eq 1 (7)	0	0	0	0	0	0	0	0	0	0	0	0	-0.00520833	1	0.0104167	-2	-0.00520833	1	0	0	0	0	0	0	0	0	0	0	0	0	0	0	0	0	0	0	0	0	0	0	0	0	0	0	0	0	0	0	0
Gov Eq 2 (7)	0	0	0	0	0	0	0	0	0	0	0	0	1	-14.4	-2	29.8	1	-14.4	0	0	0	0	0	0	0	0	0	0	0	0	0	0	0	0	0	0	0	0	0	0	0	0	0	0	0	0	0	0	0
Gov Eq 1 (8)	0	0	0	0	0	0	0	0	0	0	0	0	0	0	-0.00520833	1	0.0104167	-2	-0.00520833	1	0	0	0	0	0	0	0	0	0	0	0	0	0	0	0	0	0	0	0	0	0	0	0	0	0	0	0	0	0
Gov Eq 2 (8)	0	0	0	0	0	0	0	0	0	0	0	0	0	0	1	-14.4	-2	29.8	1	-14.4	0	0	0	0	0	0	0	0	0	0	0	0	0	0	0	0	0	0	0	0	0	0	0	0	0	0	0	0	0
Gov Eq 1 (9)	0	0	0	0	0	0	0	0	0	0	0	0	0	0	0	0	-0.00520833	1	0.0104167	-2	-0.00520833	1	0	0	0	0	0	0	0	0	0	0	0	0	0	0	0	0	0	0	0	0	0	0	0	0	0	0	0
Gov Eq 2 (9)	0	0	0	0	0	0	0	0	0	0	0	0	0	0	0	0	1	-14.4	-2	29.8	1	-14.4	0	0	0	0	0	0	0	0	0	0	0	0	0	0	0	0	0	0	0	0	0	0	0	0	0	0	0
Gov Eq 1 (10)	0	0	0	0	0	0	0	0	0	0	0	0	0	0	0	0	0	0	-0.00520833	1	0.0104167	-2	-0.00520833	1	0	0	0	0	0	0	0	0	0	0	0	0	0	0	0	0	0	0	0	0	0	0	0	0	0
Gov Eq 2 (10)	0	0	0	0	0	0	0	0	0	0	0	0	0	0	0	0	0	0	1	-14.4	-2	29.8	1	-14.4	0	0	0	0	0	0	0	0	0	0	0	0	0	0	0	0	0	0	0	0	0	0	0	0	0
Gov Eq 1 (11)	0	0	0	0	0	0	0	0	0	0	0	0	0	0	0	0	0	0	0	0	-0.00520833	1	0.0104167	-2	-0.00520833	1	0	0	0	0	0	0	0	0	0	0	0	0	0	0	0	0	0	0	0	0	0	0	0
Gov Eq 2 (11)	0	0	0	0	0	0	0	0	0	0	0	0	0	0	0	0	0	0	0	0	1	-14.4	-2	29.8	1	-14.4	0	0	0	0	0	0	0	0	0	0	0	0	0	0	0	0	0	0	0	0	0	0	0
Gov Eq 1 (12)	0	0	0	0	0	0	0	0	0	0	0	0	0	0	0	0	0	0	0	0	0	0	-0.00520833	1	0.0104167	-2	-0.00520833	1	0	0	0	0	0	0	0	0	0	0	0	0	0	0	0	0	0	0	0	0	0
Gov Eq 2 (12)	0	0	0	0	0	0	0	0	0	0	0	0	0	0	0	0	0	0	0	0	0	0	1	-14.4	-2	29.8	1	-14.4	0	0	0	0	0	0	0	0	0	0	0	0	0	0	0	0	0	0	0	0	0
Gov Eq 1 (13)	0	0	0	0	0	0	0	0	0	0	0	0	0	0	0	0	0	0	0	0	0	0	0	0	-0.00520833	1	0.0104167	-2	-0.00520833	1	0	0	0	0	0	0	0	0	0	0	0	0	0	0	0	0	0	0	0
Gov Eq 2 (13)	0	0	0	0	0	0	0	0	0	0	0	0	0	0	0	0	0	0	0	0	0	0	0	0	1	-14.4	-2	29.8	1	-14.4	0	0	0	0	0	0	0	0	0	0	0	0	0	0	0	0	0	0	0
Gov Eq 1 (14)	0	0	0	0	0	0	0	0	0	0	0	0	0	0	0	0	0	0	0	0	0	0	0	0	0	0	-0.00520833	1	0.0104167	-2	-0.00520833	1	0	0	0	0	0	0	0	0	0	0	0	0	0	0	0	0	0
Gov Eq 2 (14)	0	0	0	0	0	0	0	0	0	0	0	0	0	0	0	0	0	0	0	0	0	0	0	0	0	0	1	-14.4	-2	29.8	1	-14.4	0	0	0	0	0	0	0	0	0	0	0	0	0	0	0	0	0
Gov Eq 1 (15)	0	0	0	0	0	0	0	0	0	0	0	0	0	0	0	0	0	0	0	0	0	0	0	0	0	0	0	0	-0.00520833	1	0.0104167	-2	-0.00520833	1	0	0	0	0	0	0	0	0	0	0	0	0	0	0	0
Gov Eq 2 (15)	0	0	0	0	0	0	0	0	0	0	0	0	0	0	0	0	0	0	0	0	0	0	0	0	0	0	0	0	1	-14.4	-2	29.8	1	-14.4	0	0	0	0	0	0	0	0	0	0	0	0	0	0	0
Gov Eq 1 (16)	0	0	0	0	0	0	0	0	0	0	0	0	0	0	0	0	0	0	0	0	0	0	0	0	0	0	0	0	0	0	-0.00520833	1	0.0104167	-2	-0.00520833	1	0	0	0	0	0	0	0	0	0	0	0	0	0
Gov Eq 2 (16)	0	0	0	0	0	0	0	0	0	0	0	0	0	0	0	0	0	0	0	0	0	0	0	0	0	0	0	0	0	0	1	-14.4	-2	29.8	1	-14.4	0	0	0	0	0	0	0	0	0	0	0	0	0
Gov Eq 1 (17)	0	0	0	0	0	0	0	0	0	0	0	0	0	0	0	0	0	0	0	0	0	0	0	0	0	0	0	0	0	0	0	0	-0.00520833	1	0.0104167	-2	-0.00520833	1	0	0	0	0	0	0	0	0	0	0	0
Gov Eq 2 (17)	0	0	0	0	0	0	0	0	0	0	0	0	0	0	0	0	0	0	0	0	0	0	0	0	0	0	0	0	0	0	0	0	1	-14.4	-2	29.8	1	-14.4	0	0	0	0	0	0	0	0	0	0	0
Gov Eq 1 (18)	0	0	0	0	0	0	0	0	0	0	0	0	0	0	0	0	0	0	0	0	0	0	0	0	0	0	0	0	0	0	0	0	0	0	-0.00520833	1	0.0104167	-2	-0.00520833	1	0	0	0	0	0	0	0	0	0
Gov Eq 2 (18)	0	0	0	0	0	0	0	0	0	0	0	0	0	0	0	0	0	0	0	0	0	0	0	0	0	0	0	0	0	0	0	0	0	0	1	-14.4	-2	29.8	1	-14.4	0	0	0	0	0	0	0	0	0
Gov Eq 1 (19)	0	0	0	0	0	0	0	0	0	0	0	0	0	0	0	0	0	0	0	0	0	0	0	0	0	0	0	0	0	0	0	0	0	0	0	0	-0.00520833	1	0.0104167	-2	-0.00520833	1	0	0	0	0	0	0	0
Gov Eq 2 (19)	0	0	0	0	0	0	0	0	0	0	0	0	0	0	0	0	0	0	0	0	0	0	0	0	0	0	0	0	0	0	0	0	0	0	0	0	1	-14.4	-2	29.8	1	-14.4	0	0	0	0	0	0	0
Gov Eq 1 (20)	0	0	0	0	0	0	0	0	0	0	0	0	0	0	0	0	0	0	0	0	0	0	0	0	0	0	0	0	0	0	0	0	0	0	0	0	0	0	-0.00520833	1	0.0104167	-2	-0.00520833	1	0	0	0	0	0
Gov Eq 2 (20)	0	0	0	0	0	0	0	0	0	0	0	0	0	0	0	0	0	0	0	0	0	0	0	0	0	0	0	0	0	0	0	0	0	0	0	0	0	0	1	-14.4	-2	29.8	1	-14.4	0	0	0	0	0
Gov Eq 1 (21)	0	0	0	0	0	0	0	0	0	0	0	0	0	0	0	0	0	0	0	0	0	0	0	0	0	0	0	0	0	0	0	0	0	0	0	0	0	0	0	0	-0.00520833	1	0.0104167	-2	-0.00520833	1	0	0	0
Gov Eq 2 (21)	0	0	0	0	0	0	0	0	0	0	0	0	0	0	0	0	0	0	0	0	0	0	0	0	0	0	0	0	0	0	0	0	0	0	0	0	0	0	0	0	1	-14.4	-2	29.8	1	-14.4	0	0	0
Gov Eq 1 (22)	0	0	0	0	0	0	0	0	0	0	0	0	0	0	0	0	0	0	0	0	0	0	0	0	0	0	0	0	0	0	0	0	0	0	0	0	0	0	0	0	0	0	-0.00520833	1	0.0104167	-2	-0.00520833	1	0
Gov Eq 2 (22)	0	0	0	0	0	0	0	0	0	0	0	0	0	0	0	0	0	0	0	0	0	0	0	0	0	0	0	0	0	0	0	0	0	0	0	0	0	0	0	0	0	0	1	-14.4	-2	29.8	1	-14.4	0
Gov Eq 1 (23)	0	0	0	0	0	0	0	0	0	0	0	0	0	0	0	0	0	0	0	0	0	0	0	0	0	0	0	0	0	0	0	0	0	0	0	0	0	0	0	0	0	0	0	0	-0.00520833	1	0.0104167	-2	-0.00520833
Gov Eq 2 (23)	0	0	0	0	0	0	0	0	0	0	0	0	0	0	0	0	0	0	0	0	0	0	0	0	0	0	0	0	0	0	0	0	0	0	0	0	0	0	0	0	0	0	0	0	1	-14.4	-2	29.8	1
Gov Eq 1 (24)	0	0	0	0	0	0	0	0	0	0	0	0	0	0	0	0	0	0	0	0	0	0	0	0	0	0	0	0	0	0	0	0	0	0	0	0	0	0	0	0	0	0	0	0	0	0	-0.00520833	1	0.0104167
Gov Eq 2 (24)	0	0	0	0	0	0	0	0	0	0	0	0	0	0	0	0	0	0	0	0	0	0	0	0	0	0	0	0	0	0	0	0	0	0	0	0	0	0	0	0	0	0	0	0	0	0	1	-14.4	-2
Gov Eq 1 (25)	0	0	0	0	0	0	0	0	0	0	0	0	0	0	0	0	0	0	0	0	0	0	0	0	0	0	0	0	0	0	0	0	0	0	0	0	0	0	0	0	0	0	0	0	0	0	0	0	-0.00520833
Gov Eq 2 (25)	0	0	0	0	0	0	0	0	0	0	0	0	0	0	0	0	0	0	0	0	0	0	0	0	0	0	0	0	0	0	0	0	0	0	0	0	0	0	0	0	0	0	0	0	0	0	0	0	1
Bo Co 1 (1)	0	0	1	0	0	0	0	0	0	0	0	0	0	0	0	0	0	0	0	0	0	0	0	0	0	0	0	0	0	0	0	0	0	0	0	0	0	0	0	0	0	0	0	0	0	0	0	0	0
Bo Co 2 (1)	0	0	0	1	0	0	0	0	0	0	0	0	0	0	0	0	0	0	0	0	0	0	0	0	0	0	0	0	0	0	0	0	0	0	0	0	0	0	0	0	0	0	0	0	0	0	0	0	0
Bo Co 1 (25)	0	0	0	0	0	0	0	0	0	0	0	0	0	0	0	0	0	0	0	0	0	0	0	0	0	0	0	0	0	0	0	0	0	0	0	0	0	0	0	0	0	0	0	0	0	0	0	0	0
Bo Co 2 (25)	0	0	0	0	0	0	0	0	0	0	0	0	0	0	0	0	0	0	0	0	0	0	0	0	0	0	0	0	0	0	0	0	0	0	0	0	0	0	0	0	0	0	0	0	0	0	0	0	0
	Gov Eq 1 (1)	W0	-149.457			Calculation of the bending moments
	Gov Eq 2 (1)	h²M0	-2.32163		Position			Position	FDM	Fogang [ ]	Difference %
	Gov Eq 1 (2)	W1	2.80832e-15		0	M1 =		0	1.48573e-13	0	100
	Gov Eq 2 (2)	h²M1	1.65081e-14		0.3333	M2 =		1	55.0034	54.6809	0.5862
	Gov Eq 1 (3)	W2	147.402		0.6666	M3 =		2	96.4035	95.8373	0.587284
	Gov Eq 2 (3)	h²M2	2.18747		0.9999	M4 =		3	122.11	121.392	0.58793
	Gov Eq 1 (4)	W3	290.384		1.3332	M5 =		4	130.826	130.056	0.588144
	Gov Eq 2 (4)	h²M3	4.22846		1.6665	M6 =
	Gov Eq 1 (5)	W4	426.739		1.9998	M7 =
	Gov Eq 2 (5)	h²M4	6.11149		2.3331	M8 =
	Gov Eq 1 (6)	W5	554.431		2.6664	M9 =
	Gov Eq 2 (6)	h²M5	7.82593		2.9997	M10 =
	Gov Eq 1 (7)	W6	671.608		3.333	M11 =
	Gov Eq 2 (7)	h²M6	9.36215		3.6663	M12 =
	Gov Eq 1 (8)	W7	776.608		3.9996	M13 =
	Gov Eq 2 (8)	h²M7	10.7115		4.3329
	Gov Eq 1 (9)	W8	867.973		4.6662
	Gov Eq 2 (9)	h²M8	11.8664		4.9995
	Gov Eq 1 (10)	W9	944.453		5.3328
	Gov Eq 2 (10)	h²M9	12.8203		5.6661
	Gov Eq 1 (11)	W10	1005.02		5.9994
	Gov Eq 2 (11)	h²M10	13.5678		6.3327
	Gov Eq 1 (12)	W11	1048.86		6.666
	Gov Eq 2 (12)	h²M11	14.1048		6.9993
	Gov Eq 1 (13)	W12	1075.4		7.3326
	Gov Eq 2 (13)	h²M12	14.4282		7.6659
	Gov Eq 1 (14)	W13	1084.28		7.9992
	Gov Eq 2 (14)	h²M13	14.5362
	Gov Eq 1 (15)	W14	1075.4
	Gov Eq 2 (15)	h²M14	14.4282
	Gov Eq 1 (16)	W15	1048.86
	Gov Eq 2 (16)	h²M15	14.1048
	Gov Eq 1 (17)	W16	1005.02
	Gov Eq 2 (17)	h²M16	13.5678
	Gov Eq 1 (18)	W17	944.453
	Gov Eq 2 (18)	h²M17	12.8203
	Gov Eq 1 (19)	W18	867.973
	Gov Eq 2 (19)	h²M18	11.8664
	Gov Eq 1 (20)	W19	776.608
	Gov Eq 2 (20)	h²M19	10.7115
	Gov Eq 1 (21)	W20	671.608
	Gov Eq 2 (21)	h²M20	9.36215
	Gov Eq 1 (22)	W21	554.431
	Gov Eq 2 (22)	h²M21	7.82593
	Gov Eq 1 (23)	W22	426.739
	Gov Eq 2 (23)	h²M22	6.11149
	Gov Eq 1 (24)	W23	290.384
	Gov Eq 2 (24)	h²M23	4.22846
	Gov Eq 1 (25)	W24	147.402
	Gov Eq 2 (25)	h²M24	2.18747
	Bo Co 1 (1)	W25	0
	Bo Co 2 (1)	h²M25	1.208e-16
	Bo Co 1 (25)	W26	-149.457
	Bo Co 2 (25)	h²M26	-2.32163
[truncated: 6 more columns]
