# Supplementary material for: Timoshenko Beam Theory:First-Order Analysis, Second-Order Analysis, Stability, and Vibration Analysis Using the Finite Difference Method
Source: Preprints.org preprint supplement (doi:10.20944/preprints202105.0252.v1), 2021-05-11
Supplement: Supplementary file 5 [file Second-order element stiffness matrix of a uniform beam.xlsx]

## Sheet: Hu et al.
		4 x 4 Element stiffness matrix with Zheng-Ping Hu
		Length of the beam		L =	4	m
				Coefficient of axial force k =	-1.5
				a = EI/kGAl²=	0.05
				c = 1- P/(ksGA) =	0.925
					1.27343
					0.318357
		Matrix 1					Matrix 1
		0	0	0.101351	0		1	0	0	1
		0.101351	0	0	0		0	0.29448	1	0
		0	0	-0.101351	0		0.293004	0.956111	4	1
		-0.0296964	-0.0969032	0	0		-0.281556	0.086284	1	0
		0.0917264	0.230328	-0.0917264	0.230328		TTB =	0.0917264
		0.230328	0.675922	-0.230328	0.245389		QTB =	0.230328
		-0.0917264	-0.230328	0.0917264	-0.230328		STB =	0.675922
		0.230328	0.245389	-0.230328	0.675922		CTB =	0.245389

## Sheet: W-FDM approximation
		4 x 4 Element stiffness matrix with W-FDM aprroximation
			W FDM approximation
			Nine-point grid
		Beam length l =	4	m
		hk =	0.5	m		The governing equation
		a = EI/kGAl²=	0.05
		blk =	0.125
		Coefficient of axial force k =	-1.5
	W-1	W0	W1	W2	W3	W4	W5	W6	W7	W8	W9	W10	W11	Ti	Mi	Tk	Mk
Gov Eq (1)	0.923047	-3.66875	5.49141	-3.66875	0.923047	0	0	0	0	0	0	0	0	0	0	0	0
Gov Eq (2)	0	0.923047	-3.66875	5.49141	-3.66875	0.923047	0	0	0	0	0	0	0	0	0	0	0
Gov Eq (3)	0	0	0.923047	-3.66875	5.49141	-3.66875	0.923047	0	0	0	0	0	0	0	0	0	0
Gov Eq (4)	0	0	0	0.923047	-3.66875	5.49141	-3.66875	0.923047	0	0	0	0	0	0	0	0	0
Gov Eq (5)	0	0	0	0	0.923047	-3.66875	5.49141	-3.66875	0.923047	0	0	0	0	0	0	0	0
Gov Eq (6)	0	0	0	0	0	0.923047	-3.66875	5.49141	-3.66875	0.923047	0	0	0	0	0	0	0
Gov Eq (7)	0	0	0	0	0	0	0.923047	-3.66875	5.49141	-3.66875	0.923047	0	0	0	0	0	0
Gov Eq (8)	0	0	0	0	0	0	0	0.923047	-3.66875	5.49141	-3.66875	0.923047	0	0	0	0	0
Gov Eq (9)	0	0	0	0	0	0	0	0	0.923047	-3.66875	5.49141	-3.66875	0.923047	0	0	0	0
StaBoCo 1 (1)	3.68438	-7.275	0	7.275	-3.68438	0	0	0	0	0	0	0	0	1	0	0	0
StaBoCo 2 (1)	-0.308333	4.93333	-9.25	4.93333	-0.308333	0	0	0	0	0	0	0	0	0	1	0	0
StaBoCo 1 (9)	0	0	0	0	0	0	0	0	-3.68438	7.275	0	-7.275	3.68438	0	0	1	0
StaBoCo 2 (9)	0	0	0	0	0	0	0	0	0.308333	-4.93333	9.25	-4.93333	0.308333	0	0	0	1
GeoBoCo 1 (1)	0	0	1	0	0	0	0	0	0	0	0	0	0	0	0	0	0
GeoBoCo 2 (1)	-2.79333	4.58667	0	-4.58667	2.79333	0	0	0	0	0	0	0	0	0	0	0	0
GeoBoCo 1 (9)	0	0	0	0	0	0	0	0	0	0	1	0	0	0	0	0	0
GeoBoCo 2 (9)	0	0	0	0	0	0	0	0	-2.79333	4.58667	0	-4.58667	2.79333	0	0	0	0
						Inverse matrix
	-2.7651	-4.67098	-3.13076	-1.96424	-1.1333	-0.591255	-0.284116	-0.151919	-0.0651283	0	0	0	0	0.937453	-1.27171	0.0625475	0.0215214
	-1.62158	-2.69914	-2.17088	-1.67843	-1.24093	-0.876117	-0.599885	-0.425881	-0.182578	0	0	0	0	1.00612	-0.535846	-0.00612153	0.0603321
	1.28515e-15	1.11752e-16	8.10203e-16	1.45278e-15	1.11752e-16	1.62041e-15	-3.63195e-16	2.7938e-16	2.23504e-16	0	0	0	0	1	3.07318e-16	3.84148e-17	-1.3969e-16
	1.06929	2.49424	2.54286	2.35729	2.0163	1.60263	1.20084	0.895211	0.383782	0	0	0	0	0.931631	0.353344	0.0683688	-0.126819
	1.65333	3.85657	4.60923	4.66243	4.2151	3.47886	2.67269	2.01732	0.864836	0	0	0	0	0.815139	0.546338	0.184861	-0.285782
	1.83148	4.27211	5.36273	6.18574	5.99887	5.16883	4.0787	3.11814	1.33676	0	0	0	0	0.665869	0.605205	0.334131	-0.441728
	1.69339	3.95001	5.08371	6.21741	6.78063	6.21741	5.08371	3.95001	1.69339	0	0	0	0	0.5	0.559575	0.5	-0.559575
	1.33676	3.11814	4.0787	5.16883	5.99887	6.18574	5.36273	4.27211	1.83148	0	0	0	0	0.334131	0.441728	0.665869	-0.605205
	0.864836	2.01732	2.67269	3.47886	4.2151	4.66243	4.60923	3.85657	1.65333	0	0	0	0	0.184861	0.285782	0.815139	-0.546338
	0.383782	0.895211	1.20084	1.60263	2.0163	2.35729	2.54286	2.49424	1.06929	0	0	0	0	0.0683688	0.126819	0.931631	-0.353344
	5.05466e-17	-5.05466e-17	-1.01093e-16	-2.02186e-16	1.01093e-16	0	5.30739e-16	-1.1373e-16	3.0328e-16	0	0	0	0	2.84325e-17	6.95016e-17	1	1.26366e-16
	-0.182578	-0.425881	-0.599885	-0.876117	-1.24093	-1.67843	-2.17088	-2.69914	-1.62158	0	0	0	0	-0.00612153	-0.0603321	1.00612	0.535846
	-0.0651283	-0.151919	-0.284116	-0.591255	-1.1333	-1.96424	-3.13076	-4.67098	-2.7651	0	0	0	0	0.0625475	-0.0215214	0.937453	1.27171
	-3.29696	-6.36313	-5.77546	-4.94472	-3.99089	-3.03706	-2.20632	-1.61865	-0.693925	1	0	0	0	0.0912684	0.229519	-0.0912684	0.229305
	2.38183	0.759742	-1.37924	-2.51708	-2.87495	-2.69379	-2.22825	-1.74019	-0.746031	0	1	0	0	0.230802	0.676685	-0.230802	0.246523
	-0.693925	-1.61865	-2.20632	-3.03706	-3.99089	-4.94472	-5.77546	-6.36313	-3.29696	0	0	1	0	-0.0912684	-0.229305	0.0912684	-0.229519
	0.746031	1.74019	2.22825	2.69379	2.87495	2.51708	1.37924	-0.759742	-2.38183	0	0	0	1	0.230802	0.246523	-0.230802	0.676685
											0.0912684	0.229519	-0.0912684	0.229305		TTB =	0.0912684
											0.230802	0.676685	-0.230802	0.246523		QTB =	0.229519
											-0.0912684	-0.229305	0.0912684	-0.229519		STB =	0.676685
											0.230802	0.246523	-0.230802	0.676685		CTB =	0.246523
		W FDM approximation
		Thirteen-point grid
		Beam length l =	4	m
		hk =	0.333333	m		The governing equation
		a = EI/kGAl²=	0.05
		blk =	0.0833333
		Coefficient of axial force k =	-1.5
	W-1	W0	W1	W2	W3	W4	W5	W6	W7	W8	W9	W10	W11	W12	W13	W14	W15	Ti	Mi	Tk	Mk
Gov Eq (1)	0.924132	-3.68611	5.52396	-3.68611	0.924132	0	0	0	0	0	0	0	0	0	0	0	0	0	0	0	0
Gov Eq (2)	0	0.924132	-3.68611	5.52396	-3.68611	0.924132	0	0	0	0	0	0	0	0	0	0	0	0	0	0	0
Gov Eq (3)	0	0	0.924132	-3.68611	5.52396	-3.68611	0.924132	0	0	0	0	0	0	0	0	0	0	0	0	0	0
Gov Eq (4)	0	0	0	0.924132	-3.68611	5.52396	-3.68611	0.924132	0	0	0	0	0	0	0	0	0	0	0	0	0
Gov Eq (5)	0	0	0	0	0.924132	-3.68611	5.52396	-3.68611	0.924132	0	0	0	0	0	0	0	0	0	0	0	0
Gov Eq (6)	0	0	0	0	0	0.924132	-3.68611	5.52396	-3.68611	0.924132	0	0	0	0	0	0	0	0	0	0	0
Gov Eq (7)	0	0	0	0	0	0	0.924132	-3.68611	5.52396	-3.68611	0.924132	0	0	0	0	0	0	0	0	0	0
Gov Eq (8)	0	0	0	0	0	0	0	0.924132	-3.68611	5.52396	-3.68611	0.924132	0	0	0	0	0	0	0	0	0
Gov Eq (9)	0	0	0	0	0	0	0	0	0.924132	-3.68611	5.52396	-3.68611	0.924132	0	0	0	0	0	0	0	0
Gov Eq (10)	0	0	0	0	0	0	0	0	0	0.924132	-3.68611	5.52396	-3.68611	0.924132	0	0	0	0	0	0	0
Gov Eq (11)	0	0	0	0	0	0	0	0	0	0	0.924132	-3.68611	5.52396	-3.68611	0.924132	0	0	0	0	0	0
Gov Eq (12)	0	0	0	0	0	0	0	0	0	0	0	0.924132	-3.68611	5.52396	-3.68611	0.924132	0	0	0	0	0
Gov Eq (13)	0	0	0	0	0	0	0	0	0	0	0	0	0.924132	-3.68611	5.52396	-3.68611	0.924132	0	0	0	0
StaBoCo 1 (1)	12.4641	-24.7875	0	24.7875	-12.4641	0	0	0	0	0	0	0	0	0	0	0	0	1	0	0	0
StaBoCo 2 (1)	-0.69375	11.1	-20.8125	11.1	-0.69375	0	0	0	0	0	0	0	0	0	0	0	0	0	1	0	0
StaBoCo 1 (13)	0	0	0	0	0	0	0	0	0	0	0	0	-12.4641	24.7875	0	-24.7875	12.4641	0	0	1	0
StaBoCo 2 (13)	0	0	0	0	0	0	0	0	0	0	0	0	0.69375	-11.1	20.8125	-11.1	0.69375	0	0	0	1
GeoBoCo 1 (1)	0	0	1	0	0	0	0	0	0	0	0	0	0	0	0	0	0	0	0	0	0
GeoBoCo 2 (1)	-9.74	17.98	0	-17.98	9.74	0	0	0	0	0	0	0	0	0	0	0	0	0	0	0	0
GeoBoCo 1 (13)	0	0	0	0	0	0	0	0	0	0	0	0	0	0	1	0	0	0	0	0	0
GeoBoCo 2 (13)	0	0	0	0	0	0	0	0	0	0	0	0	-9.74	17.98	0	-17.98	9.74	0	0	0	0
						Inverse matrix
	-6.90529	-12.7986	-10.848	-9.05443	-7.42983	-5.98419	-4.72548	-3.65957	-2.79015	-2.11871	-1.64449	-1.36451	-0.636809	0	0	0	0	0.992311	-0.757843	0.00768907	0.0604205
	-3.53734	-6.49748	-5.86734	-5.20424	-4.52851	-3.86064	-3.22103	-2.62976	-2.10636	-1.6696	-1.33726	-1.12596	-0.52548	0	0	0	0	1.01189	-0.335623	-0.0118919	0.0498576
	4.6999e-15	2.05154e-15	5.49604e-15	3.61818e-15	3.95388e-15	2.98406e-15	9.6982e-16	8.57918e-15	4.8491e-15	2.90946e-15	1.75314e-15	8.57918e-16	1.06307e-15	0	0	0	0	1	1.86504e-16	5.59512e-17	-1.00246e-16
	2.68197	5.74675	5.85156	5.71999	5.39635	4.92707	4.36027	3.74513	3.13139	2.56878	2.10645	1.79241	0.836507	0	0	0	0	0.960441	0.254466	0.0395588	-0.0793679
	4.57555	9.80417	10.785	11.1116	10.8914	10.2379	9.26957	8.10845	6.87871	5.70531	4.71258	4.02279	1.87741	0	0	0	0	0.897333	0.434128	0.102667	-0.178129
	5.75657	12.3348	13.9085	15.3346	15.7149	15.2455	14.1315	12.5858	10.8259	9.07177	7.54326	6.45773	3.01379	0	0	0	0	0.815059	0.546184	0.184941	-0.285948
	6.30894	13.5184	15.4325	17.5615	19.1043	19.2662	18.3503	16.6719	14.5548	12.3277	10.3208	8.86151	4.13561	0	0	0	0	0.718218	0.598593	0.281782	-0.392387
	6.32363	13.5498	15.5857	18.0699	20.3129	21.6276	21.3372	19.8655	17.6494	15.134	12.7682	10.9988	5.13306	0	0	0	0	0.611574	0.599987	0.388426	-0.487025
	5.89767	12.6371	14.6119	17.1565	19.7011	21.6759	22.5177	21.6759	19.7011	17.1565	14.6119	12.6371	5.89767	0	0	0	0	0.5	0.559571	0.5	-0.559571
	5.13306	10.9988	12.7682	15.134	17.6494	19.8655	21.3372	21.6276	20.3129	18.0699	15.5857	13.5498	6.32363	0	0	0	0	0.388426	0.487025	0.611574	-0.599987
	4.13561	8.86151	10.3208	12.3277	14.5548	16.6719	18.3503	19.2662	19.1043	17.5615	15.4325	13.5184	6.30894	0	0	0	0	0.281782	0.392387	0.718218	-0.598593
	3.01379	6.45773	7.54326	9.07177	10.8259	12.5858	14.1315	15.2455	15.7149	15.3346	13.9085	12.3348	5.75657	0	0	0	0	0.184941	0.285948	0.815059	-0.546184
	1.87741	4.02279	4.71258	5.70531	6.87871	8.10845	9.26957	10.2379	10.8914	11.1116	10.785	9.80417	4.57555	0	0	0	0	0.102667	0.178129	0.897333	-0.434128
	0.836507	1.79241	2.10645	2.56878	3.13139	3.74513	4.36027	4.92707	5.39635	5.71999	5.85156	5.74675	2.68197	0	0	0	0	0.0395588	0.0793679	0.960441	-0.254466
	-9.3252e-17	-4.10309e-16	-4.8491e-16	-2.98406e-16	-1.26823e-15	-5.22211e-16	-5.22211e-16	-1.11902e-15	-1.04442e-15	-3.35707e-16	7.83317e-16	-5.22211e-16	-5.96813e-16	0	0	0	0	-1.16565e-17	-9.3252e-18	1	9.79146e-17
	-0.52548	-1.12596	-1.33726	-1.6696	-2.10636	-2.62976	-3.22103	-3.86064	-4.52851	-5.20424	-5.86734	-6.49748	-3.53734	0	0	0	0	-0.0118919	-0.0498576	1.01189	0.335623
	-0.636809	-1.36451	-1.64449	-2.11871	-2.79015	-3.65957	-4.72548	-5.98419	-7.42983	-9.05443	-10.848	-12.7986	-6.90529	0	0	0	0	0.00768907	-0.0604205	0.992311	0.757843
	-11.0635	-21.7812	-20.8467	-19.433	-17.6552	-15.6324	-13.4863	-11.3402	-9.31739	-7.53961	-6.12598	-5.19147	-2.42283	1	0	0	0	0.0915253	0.229973	-0.0915253	0.229878
	7.87834	6.25571	0.131524	-4.29771	-7.23155	-8.88638	-9.49302	-9.29412	-8.54138	-7.49275	-6.40953	-5.5534	-2.59174	0	1	0	0	0.230544	0.676271	-0.230544	0.245904
	-2.42283	-5.19147	-6.12598	-7.53961	-9.31739	-11.3402	-13.4863	-15.6324	-17.6552	-19.433	-20.8467	-21.7812	-11.0635	0	0	1	0	-0.0915253	-0.229878	0.0915253	-0.229973
	2.59174	5.5534	6.40953	7.49275	8.54138	9.29412	9.49302	8.88638	7.23155	4.29771	-0.131524	-6.25571	-7.87834	0	0	0	1	0.230544	0.245904	-0.230544	0.676271
															0.0915253	0.229973	-0.0915253	0.229878		TTB =	0.0915253
															0.230544	0.676271	-0.230544	0.245904		QTB =	0.229973
															-0.0915253	-0.229878	0.0915253	-0.229973		STB =	0.676271
															0.230544	0.245904	-0.230544	0.676271		CTB =	0.245904
			W FDM approximation
			Seventeen-point grid
		Beam length l =	4	m
		hk =	0.25	m		The governing equation
		a = EI/kGAl²=	0.05
		blk =	0.0625
		Coefficient of axial force k =	-1.5
	W-1	W0	W1	W2	W3	W4	W5	W6	W7	W8	W9	W10	W11	W12	W13	W14	W15	W16	W17	W18	W19	Ti	Mi	Tk	Mk
Gov Eq (1)	0.924512	-3.69219	5.53535	-3.69219	0.924512	0	0	0	0	0	0	0	0	0	0	0	0	0	0	0	0	0	0	0	0
Gov Eq (2)	0	0.924512	-3.69219	5.53535	-3.69219	0.924512	0	0	0	0	0	0	0	0	0	0	0	0	0	0	0	0	0	0	0
Gov Eq (3)	0	0	0.924512	-3.69219	5.53535	-3.69219	0.924512	0	0	0	0	0	0	0	0	0	0	0	0	0	0	0	0	0	0
Gov Eq (4)	0	0	0	0.924512	-3.69219	5.53535	-3.69219	0.924512	0	0	0	0	0	0	0	0	0	0	0	0	0	0	0	0	0
Gov Eq (5)	0	0	0	0	0.924512	-3.69219	5.53535	-3.69219	0.924512	0	0	0	0	0	0	0	0	0	0	0	0	0	0	0	0
Gov Eq (6)	0	0	0	0	0	0.924512	-3.69219	5.53535	-3.69219	0.924512	0	0	0	0	0	0	0	0	0	0	0	0	0	0	0
Gov Eq (7)	0	0	0	0	0	0	0.924512	-3.69219	5.53535	-3.69219	0.924512	0	0	0	0	0	0	0	0	0	0	0	0	0	0
Gov Eq (8)	0	0	0	0	0	0	0	0.924512	-3.69219	5.53535	-3.69219	0.924512	0	0	0	0	0	0	0	0	0	0	0	0	0
Gov Eq (9)	0	0	0	0	0	0	0	0	0.924512	-3.69219	5.53535	-3.69219	0.924512	0	0	0	0	0	0	0	0	0	0	0	0
Gov Eq (10)	0	0	0	0	0	0	0	0	0	0.924512	-3.69219	5.53535	-3.69219	0.924512	0	0	0	0	0	0	0	0	0	0	0
Gov Eq (11)	0	0	0	0	0	0	0	0	0	0	0.924512	-3.69219	5.53535	-3.69219	0.924512	0	0	0	0	0	0	0	0	0	0
Gov Eq (12)	0	0	0	0	0	0	0	0	0	0	0	0.924512	-3.69219	5.53535	-3.69219	0.924512	0	0	0	0	0	0	0	0	0
Gov Eq (13)	0	0	0	0	0	0	0	0	0	0	0	0	0.924512	-3.69219	5.53535	-3.69219	0.924512	0	0	0	0	0	0	0	0
Gov Eq (14)	0	0	0	0	0	0	0	0	0	0	0	0	0	0.924512	-3.69219	5.53535	-3.69219	0.924512	0	0	0	0	0	0	0
Gov Eq (15)	0	0	0	0	0	0	0	0	0	0	0	0	0	0	0.924512	-3.69219	5.53535	-3.69219	0.924512	0	0	0	0	0	0
Gov Eq (16)	0	0	0	0	0	0	0	0	0	0	0	0	0	0	0	0.924512	-3.69219	5.53535	-3.69219	0.924512	0	0	0	0	0
Gov Eq (17)	0	0	0	0	0	0	0	0	0	0	0	0	0	0	0	0	0.924512	-3.69219	5.53535	-3.69219	0.924512	0	0	0	0
StaBoCo 1 (1)	29.5688	-58.95	0	58.95	-29.5688	0	0	0	0	0	0	0	0	0	0	0	0	0	0	0	0	1	0	0	0
StaBoCo 2 (1)	-1.23333	19.7333	-37	19.7333	-1.23333	0	0	0	0	0	0	0	0	0	0	0	0	0	0	0	0	0	1	0	0
StaBoCo 1 (17)	0	0	0	0	0	0	0	0	0	0	0	0	0	0	0	0	-29.5688	58.95	0	-58.95	29.5688	0	0	1	0
StaBoCo 2 (17)	0	0	0	0	0	0	0	0	0	0	0	0	0	0	0	0	1.23333	-19.7333	37	-19.7333	1.23333	0	0	0	1
GeoBoCo 1 (1)	0	0	1	0	0	0	0	0	0	0	0	0	0	0	0	0	0	0	0	0	0	0	0	0	0
GeoBoCo 2 (1)	-23.3467	44.6933	0	-44.6933	23.3467	0	0	0	0	0	0	0	0	0	0	0	0	0	0	0	0	0	0	0	0
GeoBoCo 1 (17)	0	0	0	0	0	0	0	0	0	0	0	0	0	0	0	0	0	0	1	0	0	0	0	0	0
GeoBoCo 2 (17)	0	0	0	0	0	0	0	0	0	0	0	0	0	0	0	0	-23.3467	44.6933	0	-44.6933	23.3467	0	0	0	0
						Inverse matrix
	-12.4418	-23.8	-21.6444	-19.5189	-17.4438	-15.4392	-13.5246	-11.7188	-10.0403	-8.50638	-7.13368	-5.9377	-4.93286	-4.13233	-3.54802	-3.19047	-1.53437	0	0	0	0	1.00631	-0.535521	-0.00630991	0.0607602
	-6.1556	-11.7179	-11.0359	-10.2825	-9.475	-8.63127	-7.76936	-6.90745	-6.0637	-5.25617	-4.50269	-3.82074	-3.22734	-2.73897	-2.37143	-2.13976	-1.02906	0	0	0	0	1.01175	-0.243758	-0.0117482	0.0407502
	4.75808e-15	3.02278e-15	9.40421e-15	1.38824e-14	6.32545e-15	1.42743e-14	1.00759e-14	1.18672e-14	8.39662e-15	1.45541e-15	7.83684e-16	2.35105e-15	5.59775e-15	7.66891e-15	6.15752e-16	2.96681e-15	-1.67932e-16	0	0	0	0	1	2.44901e-17	2.53648e-17	6.12253e-18
	5.00256	10.402	10.5379	10.4415	10.143	9.67384	9.06651	8.3544	7.57157	6.75252	5.93198	5.14469	4.42519	3.80757	3.3253	3.01096	1.44804	0	0	0	0	0.972689	0.198098	0.0273109	-0.0573415
	8.91862	18.5447	19.6551	20.1538	20.1116	19.6029	18.7049	17.4975	16.0622	14.4823	12.8418	11.2251	9.71666	8.39995	7.35743	6.66973	3.20764	0	0	0	0	0.931538	0.353171	0.0684623	-0.12702
	11.8216	24.581	26.4383	28.2534	29.0645	28.9982	28.1864	26.7659	24.8772	22.664	20.2717	17.8472	15.5373	13.4884	11.8449	10.7488	5.16938	0	0	0	0	0.878356	0.468128	0.121644	-0.204704
	13.7914	28.6769	31.0705	33.8669	36.1668	37.0741	36.783	35.4956	33.42	30.7694	27.7608	24.6133	21.5468	18.7809	16.5333	15.0181	7.22258	0	0	0	0	0.81503	0.54613	0.18497	-0.286009
	14.9137	31.0106	33.7481	37.2184	40.5954	43.0534	43.7726	43.0259	41.0955	38.271	34.8478	31.1249	27.4034	23.9844	21.1669	19.2462	9.25599	0	0	0	0	0.743511	0.590574	0.256489	-0.366531
	15.2798	31.7717	34.6802	38.5464	42.6257	46.1722	48.4431	48.7038	47.3143	44.6448	41.0737	36.9852	32.7666	28.8062	25.4905	23.2021	11.1585	0	0	0	0	0.6658	0.605069	0.3342	-0.441867
	14.9854	31.1597	34.0868	38.1021	42.5485	46.7663	50.097	51.8879	51.4961	49.3741	45.9854	41.8014	37.2988	32.956	29.2507	26.6563	12.8197	0	0	0	0	0.583941	0.593413	0.416059	-0.50765
	14.1309	29.3827	32.1976	36.1479	40.6677	45.1875	49.1378	51.9527	53.0737	51.9527	49.1378	45.1875	40.6677	36.1479	32.1976	29.3827	14.1309	0	0	0	0	0.5	0.559572	0.5	-0.559572
	12.8197	26.6563	29.2507	32.956	37.2988	41.8014	45.9854	49.3741	51.4961	51.8879	50.097	46.7663	42.5485	38.1021	34.0868	31.1597	14.9854	0	0	0	0	0.416059	0.50765	0.583941	-0.593413
	11.1585	23.2021	25.4905	28.8062	32.7666	36.9852	41.0737	44.6448	47.3143	48.7038	48.4431	46.1722	42.6257	38.5464	34.6802	31.7717	15.2798	0	0	0	0	0.3342	0.441867	0.6658	-0.605069
	9.25599	19.2462	21.1669	23.9844	27.4034	31.1249	34.8478	38.271	41.0955	43.0259	43.7726	43.0534	40.5954	37.2184	33.7481	31.0106	14.9137	0	0	0	0	0.256489	0.366531	0.743511	-0.590574
	7.22258	15.0181	16.5333	18.7809	21.5468	24.6133	27.7608	30.7694	33.42	35.4956	36.783	37.0741	36.1668	33.8669	31.0705	28.6769	13.7914	0	0	0	0	0.18497	0.286009	0.81503	-0.54613
	5.16938	10.7488	11.8449	13.4884	15.5373	17.8472	20.2717	22.664	24.8772	26.7659	28.1864	28.9982	29.0645	28.2534	26.4383	24.581	11.8216	0	0	0	0	0.121644	0.204704	0.878356	-0.468128
	3.20764	6.66973	7.35743	8.39995	9.71666	11.2251	12.8418	14.4823	16.0622	17.4975	18.7049	19.6029	20.1116	20.1538	19.6551	18.5447	8.91862	0	0	0	0	0.0684623	0.12702	0.931538	-0.353171
	1.44804	3.01096	3.3253	3.80757	4.42519	5.14469	5.93198	6.75252	7.57157	8.3544	9.06651	9.67384	10.143	10.4415	10.5379	10.402	5.00256	0	0	0	0	0.0273109	0.0573415	0.972689	-0.198098
	-4.4782e-16	-2.79887e-16	-2.79887e-16	-1.17553e-15	-1.00759e-15	-2.2391e-16	2.2391e-16	-1.00759e-15	-3.35865e-16	-5.59775e-16	-1.45541e-15	8.95639e-16	-1.11955e-15	-2.96681e-15	-2.09915e-15	-4.92602e-15	8.39662e-16	0	0	0	0	-1.7493e-18	-1.13704e-17	1	5.24789e-17
	-1.02906	-2.13976	-2.37143	-2.73897	-3.22734	-3.82074	-4.50269	-5.25617	-6.0637	-6.90745	-7.76936	-8.63127	-9.475	-10.2825	-11.0359	-11.7179	-6.1556	0	0	0	0	-0.0117482	-0.0407502	1.01175	0.243758
	-1.53437	-3.19047	-3.54802	-4.13233	-4.93286	-5.9377	-7.13368	-8.50638	-10.0403	-11.7188	-13.5246	-15.4392	-17.4438	-19.5189	-21.6444	-23.8	-12.4418	0	0	0	0	-0.00630991	-0.0607602	1.00631	0.535521
	-26.1717	-51.8824	-50.6017	-48.6085	-46.0143	-42.9349	-39.4888	-35.7969	-31.9817	-28.1666	-24.4747	-21.0286	-17.9491	-15.355	-13.3618	-12.0811	-5.8101	1	0	0	0	0.0916137	0.230129	-0.0916137	0.230076
	18.4081	19.4856	7.3757	-2.35419	-9.89166	-15.4382	-19.2079	-21.4262	-22.3282	-22.1576	-21.1646	-19.6049	-17.7375	-15.8236	-14.1246	-12.9005	-6.20417	0	1	0	0	0.23045	0.67612	-0.23045	0.245681
	-5.8101	-12.0811	-13.3618	-15.355	-17.9491	-21.0286	-24.4747	-28.1666	-31.9817	-35.7969	-39.4888	-42.9349	-46.0143	-48.6085	-50.6017	-51.8824	-26.1717	0	0	1	0	-0.0916137	-0.230076	0.0916137	-0.230129
	6.20417	12.9005	14.1246	15.8236	17.7375	19.6049	21.1646	22.1576	22.3282	21.4262	19.2079	15.4382	9.89166	2.35419	-7.3757	-19.4856	-18.4081	0	0	0	1	0.23045	0.245681	-0.23045	0.67612
																			0.0916137	0.230129	-0.0916137	0.230076		TTB =	0.0916137
																			0.23045	0.67612	-0.23045	0.245681		QTB =	0.230129
																			-0.0916137	-0.230076	0.0916137	-0.230129		STB =	0.67612
																			0.23045	0.245681	-0.23045	0.67612		CTB =	0.245681

## Sheet: M-W FDM approximation
		4 x 4 Element stiffness matrix with M-W FDM aprroximation
			M-W FDM approximation
			Nine-point grid
		Beam length l =	4	m
		hk =	0.5	m			The governing equations
		a = EI/kGAl²=	0.05
		blk =	0.125
		Coefficient of axial force k =	-1.5
			-0.0234375
	W0	h²M0	W1	h²M1	W2	h²M2	W3	h²M3	W4	h²M4	W5	h²M5	W6	h²M6	W7	h²M7	W8	h²M8	W9	h²M9	W10	h²M10	Ti	Mi	Tk	Mk
Gov Eq 1 (1)	-0.0234375	1	0.046875	-2	-0.0234375	1	0	0	0	0	0	0	0	0	0	0	0	0	0	0	0	0	0	0	0	0
Gov Eq 2 (1)	1	-3.2	-2	7.4	1	-3.2	0	0	0	0	0	0	0	0	0	0	0	0	0	0	0	0	0	0	0	0
Gov Eq 1 (2)	0	0	-0.0234375	1	0.046875	-2	-0.0234375	1	0	0	0	0	0	0	0	0	0	0	0	0	0	0	0	0	0	0
Gov Eq 2 (2)	0	0	1	-3.2	-2	7.4	1	-3.2	0	0	0	0	0	0	0	0	0	0	0	0	0	0	0	0	0	0
Gov Eq 1 (3)	0	0	0	0	-0.0234375	1	0.046875	-2	-0.0234375	1	0	0	0	0	0	0	0	0	0	0	0	0	0	0	0	0
Gov Eq 2 (3)	0	0	0	0	1	-3.2	-2	7.4	1	-3.2	0	0	0	0	0	0	0	0	0	0	0	0	0	0	0	0
Gov Eq 1 (4)	0	0	0	0	0	0	-0.0234375	1	0.046875	-2	-0.0234375	1	0	0	0	0	0	0	0	0	0	0	0	0	0	0
Gov Eq 2 (4)	0	0	0	0	0	0	1	-3.2	-2	7.4	1	-3.2	0	0	0	0	0	0	0	0	0	0	0	0	0	0
Gov Eq 1 (5)	0	0	0	0	0	0	0	0	-0.0234375	1	0.046875	-2	-0.0234375	1	0	0	0	0	0	0	0	0	0	0	0	0
Gov Eq 2 (5)	0	0	0	0	0	0	0	0	1	-3.2	-2	7.4	1	-3.2	0	0	0	0	0	0	0	0	0	0	0	0
Gov Eq 1 (6)	0	0	0	0	0	0	0	0	0	0	-0.0234375	1	0.046875	-2	-0.0234375	1	0	0	0	0	0	0	0	0	0	0
Gov Eq 2 (6)	0	0	0	0	0	0	0	0	0	0	1	-3.2	-2	7.4	1	-3.2	0	0	0	0	0	0	0	0	0	0
Gov Eq 1 (7)	0	0	0	0	0	0	0	0	0	0	0	0	-0.0234375	1	0.046875	-2	-0.0234375	1	0	0	0	0	0	0	0	0
Gov Eq 2 (7)	0	0	0	0	0	0	0	0	0	0	0	0	1	-3.2	-2	7.4	1	-3.2	0	0	0	0	0	0	0	0
Gov Eq 1 (8)	0	0	0	0	0	0	0	0	0	0	0	0	0	0	-0.0234375	1	0.046875	-2	-0.0234375	1	0	0	0	0	0	0
Gov Eq 2 (8)	0	0	0	0	0	0	0	0	0	0	0	0	0	0	1	-3.2	-2	7.4	1	-3.2	0	0	0	0	0	0
Gov Eq 1 (9)	0	0	0	0	0	0	0	0	0	0	0	0	0	0	0	0	-0.0234375	1	0.046875	-2	-0.0234375	1	0	0	0	0
Gov Eq 2 (9)	0	0	0	0	0	0	0	0	0	0	0	0	0	0	0	0	1	-3.2	-2	7.4	1	-3.2	0	0	0	0
StaBoCo 1 (1)	0.09375	-4	0	0	-0.09375	4	0	0	0	0	0	0	0	0	0	0	0	0	0	0	0	0	1	0	0	0
StaBoCo 2 (1)	0	0	0	-1	0	0	0	0	0	0	0	0	0	0	0	0	0	0	0	0	0	0	0	0.25	0	0
StaBoCo 1 (9)	0	0	0	0	0	0	0	0	0	0	0	0	0	0	0	0	-0.09375	4	0	0	0.09375	-4	0	0	1	0
StaBoCo 2 (9)	0	0	0	0	0	0	0	0	0	0	0	0	0	0	0	0	0	0	0	0	0	1	0	0	0	0.25
GeoBoCo 1 (1)	0	0	1	0	0	0	0	0	0	0	0	0	0	0	0	0	0	0	0	0	0	0	0	0	0	0
GeoBoCo 2 (1)	-1	3.2	0	0	1	-3.2	0	0	0	0	0	0	0	0	0	0	0	0	0	0	0	0	0	0	0	0
GeoBoCo 1 (9)	0	0	0	0	0	0	0	0	0	0	0	0	0	0	0	0	0	0	1	0	0	0	0	0	0	0
GeoBoCo 2 (9)	0	0	0	0	0	0	0	0	0	0	0	0	0	0	0	0	-1	3.2	0	0	1	-3.2	0	0	0	0
							Inverse matrix
	3.45946	0.548092	2.83852	-0.00766133	2.22586	-0.030232	1.64589	-0.0520366	1.12217	-0.0725227	0.676856	-0.0911712	0.330105	-0.10751	0.0995799	-0.121124	-1.21442e-16	-0.0658347	0	0	0	0	1.00821	-0.532989	-0.00821147	0.0658347
	1.08108	0.208179	1.70195	0.337599	1.95785	0.275623	1.91578	0.206663	1.65028	0.132467	1.24158	0.0549146	0.773516	-0.0240294	0.331426	-0.102365	-6.33016e-17	-0.089053	0	0	0	0	0.0679737	0.182842	-0.0679737	0.089053
	0	5.55112e-17	0	0	-1.11022e-16	0	4.44089e-16	0	-4.44089e-16	-1.11022e-16	-2.22045e-16	5.55112e-17	-2.22045e-16	0	0	-3.46945e-18	0	0	0	0	0	0	1	5.55112e-17	0	0
	0	0.167049	0.70479	0.294048	1.09169	0.246548	1.21205	0.1928	1.12398	0.134167	0.890867	0.0721346	0.579769	0.00827451	0.259725	-0.0557952	-2.19252e-17	-0.0592256	0	0	0	0	0.0565687	0.167049	-0.0565687	0.0592256
	0	0.352395	-3.60046	-0.310229	-3.40607	-0.236306	-2.95622	-0.156396	-2.33729	-0.0725227	-1.63996	0.0131879	-0.956882	0.0985643	-0.380364	0.181443	1.45145e-16	0.129862	0	0	0	0	0.930633	0.352395	0.0693668	-0.129862
	0	0.147024	-0.310229	0.243047	0.19787	0.211225	0.477618	0.174051	0.569203	0.132467	0.517579	0.0875268	0.371332	0.0403687	0.181443	-0.00781222	2.00068e-17	-0.0278976	0	0	0	0	0.0437304	0.147024	-0.0437304	0.0278976
	0	0.545845	-3.40607	0.19787	-7.02605	-0.700963	-6.42878	-0.500955	-5.28993	-0.288253	-3.83946	-0.0682479	-2.3152	0.153487	-0.956882	0.371332	1.10358e-16	0.289884	0	0	0	0	0.81399	0.545845	0.18601	-0.289884
	0	0.123274	-0.236306	0.211225	-0.700963	0.17055	-0.268918	0.150892	-2.26185e-16	0.127411	0.131176	0.100701	0.153487	0.0714401	0.0985643	0.0403687	1.19623e-17	0.00413726	0	0	0	0	0.0297841	0.123274	-0.0297841	-0.00413726
	0	0.606026	-2.95622	0.477618	-6.42878	-0.268918	-9.61062	-1.00864	-8.24257	-0.641725	-6.18077	-0.25855	-3.83946	0.131176	-1.63996	0.517579	6.26396e-17	0.445434	0	0	0	0	0.665148	0.606026	0.334852	-0.445434
	0	0.0963999	-0.156396	0.174051	-0.500955	0.150892	-1.00864	0.12391	-0.569203	0.119127	-0.25855	0.111324	-0.0682479	0.100701	0.0131879	0.0875268	3.61465e-18	0.0360673	0	0	0	0	0.0150831	0.0963999	-0.0150831	-0.0360673
	0	0.561991	-2.33729	0.569203	-5.28993	-4.64841e-16	-8.24257	-0.569203	-10.5799	-1.12398	-8.24257	-0.569203	-5.28993	1.73762e-15	-2.33729	0.569203	1.10131e-17	0.561991	0	0	0	0	0.5	0.561991	0.5	-0.561991
	0	0.0670835	-0.0725227	0.132467	-0.288253	0.127411	-0.641725	0.119127	-1.12398	0.107824	-0.641725	0.119127	-0.288253	0.127411	-0.0725227	0.132467	-4.82454e-18	0.0670835	0	0	0	0	1.94454e-17	0.0670835	-3.75944e-17	-0.0670835
	0	0.445434	-1.63996	0.517579	-3.83946	0.131176	-6.18077	-0.25855	-8.24257	-0.641725	-9.61062	-1.00864	-6.42878	-0.268918	-2.95622	0.477618	-3.53977e-17	0.606026	0	0	0	0	0.334852	0.445434	0.665148	-0.606026
	0	0.0360673	0.0131879	0.0875268	-0.0682479	0.100701	-0.25855	0.111324	-0.569203	0.119127	-1.00864	0.12391	-0.500955	0.150892	-0.156396	0.174051	-1.31415e-17	0.0963999	0	0	0	0	-0.0150831	0.0360673	0.0150831	-0.0963999
	0	0.289884	-0.956882	0.371332	-2.3152	0.153487	-3.83946	-0.0682479	-5.28993	-0.288253	-6.42878	-0.500955	-7.02605	-0.700963	-3.40607	0.19787	-2.12962e-17	0.545845	0	0	0	0	0.18601	0.289884	0.81399	-0.545845
	0	0.00413726	0.0985643	0.0403687	0.153487	0.0714401	0.131176	0.100701	-7.38529e-16	0.127411	-0.268918	0.150892	-0.700963	0.17055	-0.236306	0.211225	-6.65505e-18	0.123274	0	0	0	0	-0.0297841	0.00413726	0.0297841	-0.123274
	0	0.129862	-0.380364	0.181443	-0.956882	0.0985643	-1.63996	0.0131879	-2.33729	-0.0725227	-2.95622	-0.156396	-3.40607	-0.236306	-3.60046	-0.310229	0	0.352395	0	0	0	0	0.0693668	0.129862	0.930633	-0.352395
	0	-0.0278976	0.181443	-0.00781222	0.371332	0.0403687	0.517579	0.0875268	0.569203	0.132467	0.477618	0.174051	0.19787	0.211225	-0.310229	0.243047	0	0.147024	0	0	0	0	-0.0437304	-0.0278976	0.0437304	-0.147024
	0	0	0	0	0	0	0	0	0	0	0	0	0	0	0	0	0	0	0	0	0	0	0	0	1	1.11022e-16
	0	-0.0592256	0.259725	-0.0557952	0.579769	0.00827451	0.890867	0.0721346	1.12398	0.134167	1.21205	0.1928	1.09169	0.246548	0.70479	0.294048	0	0.167049	0	0	0	0	-0.0565687	-0.0592256	0.0565687	-0.167049
	0	-0.0658347	0.0995799	-0.121124	0.330105	-0.10751	0.676856	-0.0911712	1.12217	-0.0725227	1.64589	-0.0520366	2.22586	-0.030232	2.83852	-0.00766133	3.45946	0.548092	0	0	0	0	-0.00821147	-0.0658347	1.00821	0.532989
	0	-0.089053	0.331426	-0.102365	0.773516	-0.0240294	1.24158	0.0549146	1.65028	0.132467	1.91578	0.206663	1.95785	0.275623	1.70195	0.337599	1.08108	0.208179	0	0	0	0	-0.0679737	-0.089053	0.0679737	-0.182842
	4	0.226275	7.44507	0.349843	6.51192	0.238273	5.32119	0.120665	4	1.02747e-16	2.67881	-0.120665	1.48808	-0.238273	0.554935	-0.349843	-3.08241e-16	-0.226275	1	0	0	0	0.0896999	0.226275	-0.0896999	0.226275
	0	0.668197	2.81916	1.17619	4.36676	0.98619	4.84821	0.771199	4.49593	0.536668	3.56347	0.288538	2.31908	0.0330981	1.0389	-0.223181	5.55112e-16	-0.236902	0	4	0	0	0.226275	0.668197	-0.226275	0.236902
	0	-0.226275	0.554935	-0.349843	1.48808	-0.238273	2.67881	-0.120665	4	0	5.32119	0.120665	6.51192	0.238273	7.44507	0.349843	4	0.226275	0	0	1	0	-0.0896999	-0.226275	0.0896999	-0.226275
	0	0.356212	-1.3257	0.409458	-3.09406	0.0961175	-4.96633	-0.219658	-6.60113	-0.529869	-7.66311	-0.826653	-7.8314	-1.10249	-6.8078	-1.3504	-4.32432	-0.832718	0	0	0	4	0.271895	0.356212	-0.271895	0.731367
																				0.0896999	0.226275	-0.0896999	0.226275		TTB =	0.0896999
																				0.226275	0.668197	-0.226275	0.236902		QTB =	0.226275
																				-0.0896999	-0.226275	0.0896999	-0.226275		STB =	0.668197
																				0.271895	0.356212	-0.271895	0.731367		CTB =	0.236902
		4 x 4 Element stiffness matrix with W-FDM aprroximation
			M-W FDM approximation
			Thirteen-point grid
		Beam length l =	4	m
		hk =	0.333333	m			The governing equations
		a = EI/kGAl²=	0.05
		blk =	0.0833333
		Coefficient of axial force k =	-1.5
			-0.0104167
	W0	h²M0	W1	h²M1	W2	h²M2	W3	h²M3	W4	h²M4	W5	h²M5	W6	h²M6	W7	h²M7	W8	h²M8	W9	h²M9	W10	h²M10	W11	h²M11	W12	h²M12	W13	h²M13	W14	h²M14	Ti	Mi	Tk	Mk
Gov Eq 1 (1)	-0.0104167	1	0.0208333	-2	-0.0104167	1	0	0	0	0	0	0	0	0	0	0	0	0	0	0	0	0	0	0	0	0	0	0	0	0	0	0	0	0
Gov Eq 2 (1)	1	-7.2	-2	15.4	1	-7.2	0	0	0	0	0	0	0	0	0	0	0	0	0	0	0	0	0	0	0	0	0	0	0	0	0	0	0	0
Gov Eq 1 (2)	0	0	-0.0104167	1	0.0208333	-2	-0.0104167	1	0	0	0	0	0	0	0	0	0	0	0	0	0	0	0	0	0	0	0	0	0	0	0	0	0	0
Gov Eq 2 (2)	0	0	1	-7.2	-2	15.4	1	-7.2	0	0	0	0	0	0	0	0	0	0	0	0	0	0	0	0	0	0	0	0	0	0	0	0	0	0
Gov Eq 1 (3)	0	0	0	0	-0.0104167	1	0.0208333	-2	-0.0104167	1	0	0	0	0	0	0	0	0	0	0	0	0	0	0	0	0	0	0	0	0	0	0	0	0
Gov Eq 2 (3)	0	0	0	0	1	-7.2	-2	15.4	1	-7.2	0	0	0	0	0	0	0	0	0	0	0	0	0	0	0	0	0	0	0	0	0	0	0	0
Gov Eq 1 (4)	0	0	0	0	0	0	-0.0104167	1	0.0208333	-2	-0.0104167	1	0	0	0	0	0	0	0	0	0	0	0	0	0	0	0	0	0	0	0	0	0	0
Gov Eq 2 (4)	0	0	0	0	0	0	1	-7.2	-2	15.4	1	-7.2	0	0	0	0	0	0	0	0	0	0	0	0	0	0	0	0	0	0	0	0	0	0
Gov Eq 1 (5)	0	0	0	0	0	0	0	0	-0.0104167	1	0.0208333	-2	-0.0104167	1	0	0	0	0	0	0	0	0	0	0	0	0	0	0	0	0	0	0	0	0
Gov Eq 2 (5)	0	0	0	0	0	0	0	0	1	-7.2	-2	15.4	1	-7.2	0	0	0	0	0	0	0	0	0	0	0	0	0	0	0	0	0	0	0	0
Gov Eq 1 (6)	0	0	0	0	0	0	0	0	0	0	-0.0104167	1	0.0208333	-2	-0.0104167	1	0	0	0	0	0	0	0	0	0	0	0	0	0	0	0	0	0	0
Gov Eq 2 (6)	0	0	0	0	0	0	0	0	0	0	1	-7.2	-2	15.4	1	-7.2	0	0	0	0	0	0	0	0	0	0	0	0	0	0	0	0	0	0
Gov Eq 1 (7)	0	0	0	0	0	0	0	0	0	0	0	0	-0.0104167	1	0.0208333	-2	-0.0104167	1	0	0	0	0	0	0	0	0	0	0	0	0	0	0	0	0
Gov Eq 2 (7)	0	0	0	0	0	0	0	0	0	0	0	0	1	-7.2	-2	15.4	1	-7.2	0	0	0	0	0	0	0	0	0	0	0	0	0	0	0	0
Gov Eq 1 (8)	0	0	0	0	0	0	0	0	0	0	0	0	0	0	-0.0104167	1	0.0208333	-2	-0.0104167	1	0	0	0	0	0	0	0	0	0	0	0	0	0	0
Gov Eq 2 (8)	0	0	0	0	0	0	0	0	0	0	0	0	0	0	1	-7.2	-2	15.4	1	-7.2	0	0	0	0	0	0	0	0	0	0	0	0	0	0
Gov Eq 1 (9)	0	0	0	0	0	0	0	0	0	0	0	0	0	0	0	0	-0.0104167	1	0.0208333	-2	-0.0104167	1	0	0	0	0	0	0	0	0	0	0	0	0
Gov Eq 2 (9)	0	0	0	0	0	0	0	0	0	0	0	0	0	0	0	0	1	-7.2	-2	15.4	1	-7.2	0	0	0	0	0	0	0	0	0	0	0	0
Gov Eq 1 (10)	0	0	0	0	0	0	0	0	0	0	0	0	0	0	0	0	0	0	-0.0104167	1	0.0208333	-2	-0.0104167	1	0	0	0	0	0	0	0	0	0	0
Gov Eq 2 (10)	0	0	0	0	0	0	0	0	0	0	0	0	0	0	0	0	0	0	1	-7.2	-2	15.4	1	-7.2	0	0	0	0	0	0	0	0	0	0
Gov Eq 1 (11)	0	0	0	0	0	0	0	0	0	0	0	0	0	0	0	0	0	0	0	0	-0.0104167	1	0.0208333	-2	-0.0104167	1	0	0	0	0	0	0	0	0
Gov Eq 2 (11)	0	0	0	0	0	0	0	0	0	0	0	0	0	0	0	0	0	0	0	0	1	-7.2	-2	15.4	1	-7.2	0	0	0	0	0	0	0	0
Gov Eq 1 (12)	0	0	0	0	0	0	0	0	0	0	0	0	0	0	0	0	0	0	0	0	0	0	-0.0104167	1	0.0208333	-2	-0.0104167	1	0	0	0	0	0	0
Gov Eq 2 (12)	0	0	0	0	0	0	0	0	0	0	0	0	0	0	0	0	0	0	0	0	0	0	1	-7.2	-2	15.4	1	-7.2	0	0	0	0	0	0
Gov Eq 1 (13)	0	0	0	0	0	0	0	0	0	0	0	0	0	0	0	0	0	0	0	0	0	0	0	0	-0.0104167	1	0.0208333	-2	-0.0104167	1	0	0	0	0
Gov Eq 2 (13)	0	0	0	0	0	0	0	0	0	0	0	0	0	0	0	0	0	0	0	0	0	0	0	0	1	-7.2	-2	15.4	1	-7.2	0	0	0	0
StaBoCo 1 (1)	0.140625	-13.5	0	0	-0.140625	13.5	0	0	0	0	0	0	0	0	0	0	0	0	0	0	0	0	0	0	0	0	0	0	0	0	1	0	0	0
StaBoCo 2 (1)	0	0	0	-1	0	0	0	0	0	0	0	0	0	0	0	0	0	0	0	0	0	0	0	0	0	0	0	0	0	0	0	0.111111	0	0
StaBoCo 1 (13)	0	0	0	0	0	0	0	0	0	0	0	0	0	0	0	0	0	0	0	0	0	0	0	0	-0.140625	13.5	0	0	0.140625	-13.5	0	0	1	0
StaBoCo 2 (13)	0	0	0	0	0	0	0	0	0	0	0	0	0	0	0	0	0	0	0	0	0	0	0	0	0	0	0	0	0	1	0	0	0	0.111111
GeoBoCo 1 (1)	0	0	1	0	0	0	0	0	0	0	0	0	0	0	0	0	0	0	0	0	0	0	0	0	0	0	0	0	0	0	0	0	0	0
GeoBoCo 2 (1)	-1.5	10.8	0	0	1.5	-10.8	0	0	0	0	0	0	0	0	0	0	0	0	0	0	0	0	0	0	0	0	0	0	0	0	0	0	0	0
GeoBoCo 1 (13)	0	0	0	0	0	0	0	0	0	0	0	0	0	0	0	0	0	0	0	0	0	0	0	0	0	0	1	0	0	0	0	0	0	0
GeoBoCo 2 (13)	0	0	0	0	0	0	0	0	0	0	0	0	0	0	0	0	0	0	0	0	0	0	0	0	-1.5	10.8	0	0	1.5	-10.8	0	0	0	0
							Inverse matrix
	7.78378	0.578774	7.06112	0.0564818	6.27739	0.0358608	5.45489	0.0148359	4.61636	-0.00635613	3.7847	-0.0274765	2.98274	-0.0482875	2.23298	-0.0685547	1.55734	-0.0880499	0.976884	-0.106554	0.511624	-0.123857	0.180262	-0.139766	-4.01436e-17	-0.0770506	5.60483e-18	4.44455e-16	0	3.3472e-16	1.01246	-0.334871	-0.0124572	0.0513671
	1.08108	0.1308	1.79594	0.228901	2.26333	0.204886	2.50923	0.178564	2.56208	0.150232	2.45252	0.120207	2.21301	0.0888289	1.87746	0.0564504	1.48089	0.0234361	1.05898	-0.00984207	0.647713	-0.0430094	0.282942	-0.0756924	1.48189e-16	-0.0537615	0	3.41169e-16	0	2.22362e-16	0.0288833	0.0796922	-0.0288833	0.035841
	9.86076e-32	0	4.44089e-16	0	8.88178e-16	0	-8.88178e-16	0	8.88178e-16	0	0	0	-1.77636e-15	0	8.88178e-16	0	0	0	0	0	4.44089e-16	6.93889e-18	-2.22045e-16	0	0	-2.77556e-17	0	0	0	0	1	-5.55112e-17	0	0
	2.0879e-16	0.112076	0.762288	0.206702	1.30112	0.186925	1.63786	0.165043	1.79618	0.141302	1.80175	0.11597	1.68194	0.0893319	1.46555	0.061688	1.18248	0.0333493	0.863348	0.00463515	0.539209	-0.0241312	0.241158	-0.0526259	1.43779e-16	-0.0402639	-7.279e-19	2.61294e-16	0	1.64452e-16	0.0253899	0.0747171	-0.0253899	0.0268426
	-2.37839e-15	0.381144	-7.88521	-0.279943	-7.684	-0.237942	-7.22556	-0.19326	-6.55818	-0.146403	-5.73253	-0.0978963	-4.80105	-0.0482875	-3.81736	0.00186503	-2.83569	0.0519966	-1.91023	0.101543	-1.09455	0.149945	-0.440974	0.196659	-1.15294e-16	0.120579	5.60483e-18	-7.26935e-16	0	-5.12507e-16	0.960094	0.254096	0.0399058	-0.0803861
	-1.07044e-16	0.103351	-0.279943	0.182175	0.324248	0.166858	0.748052	0.149662	1.01006	0.130781	1.13068	0.110427	1.13193	0.0888289	1.03714	0.0662309	0.870747	0.042887	0.657993	0.0190602	0.424633	-0.0049813	0.196659	-0.0289667	1.37751e-16	-0.0263129	0	1.78476e-16	0	1.04691e-16	0.0216106	0.0689006	-0.0216106	0.017542
	-2.43526e-15	0.650558	-7.684	0.324248	-15.7185	-0.65627	-15.2598	-0.548318	-14.2083	-0.43419	-12.6874	-0.315173	-10.8258	-0.192606	-8.75595	-0.0678709	-6.61273	0.0576288	-4.53181	0.18248	-2.64817	0.305275	-1.09455	0.424633	-7.59898e-16	0.269605	5.96878e-18	-1.80373e-15	0	-1.13819e-15	0.896825	0.433705	0.103175	-0.179736
	-1.1531e-16	0.0934624	-0.237942	0.166858	-0.65627	0.144913	-0.15018	0.132596	0.212562	0.118787	0.446886	0.10364	0.569167	0.0873256	0.597042	0.070028	0.549212	0.0519417	0.445228	0.0332706	0.305275	0.0142247	0.149945	-0.0049813	7.73394e-17	-0.0120656	0	7.18558e-17	0	4.37511e-17	0.017588	0.0623083	-0.017588	0.00804374
	-2.73257e-15	0.818931	-7.22556	0.748052	-15.2598	-0.15018	-23.1317	-1.04672	-22.0882	-0.850395	-20.1254	-0.644492	-17.4659	-0.431331	-14.34	-0.213313	-10.9835	0.00710787	-7.63472	0.227448	-4.53181	0.445228	-1.91023	0.657993	-1.48811e-15	0.431674	5.88916e-18	-2.9582e-15	0	-1.81118e-15	0.814543	0.545954	0.185457	-0.287783
	-1.53682e-16	0.0825213	-0.19326	0.149662	-0.548318	0.132596	-1.04672	0.114037	-0.587329	0.105455	-0.241943	0.0956859	-4.37995e-15	0.0848389	0.150225	0.0730364	0.221492	0.0604115	0.227448	0.0471063	0.18248	0.0332706	0.101543	0.0190602	1.60569e-17	0.00231758	0	-3.55739e-17	0	-1.76817e-17	0.0133673	0.0550142	-0.0133673	-0.00154505
	-3.00974e-15	0.898092	-6.55818	1.01006	-14.2083	0.212562	-22.0882	-0.587329	-29.3332	-1.38061	-27.3019	-1.07726	-24.1059	-0.761774	-20.0864	-0.437713	-15.5937	-0.108723	-10.9835	0.221492	-6.61273	0.549212	-2.83569	0.870747	-2.23369e-15	0.591238	5.8784e-18	-4.07421e-15	0	-2.46505e-15	0.717809	0.598728	0.282191	-0.394159
	-2.22387e-16	0.0706509	-0.146403	0.130781	-0.43419	0.118787	-0.850395	0.105455	-1.38061	0.0909364	-0.928047	0.0866545	-0.569167	0.0813968	-0.298284	0.0752224	-0.108723	0.068201	0.00710787	0.0604115	0.0576288	0.0519417	0.0519966	0.042887	-4.54065e-17	0.0166747	0	-1.42603e-16	0	-7.89154e-17	0.00899604	0.0471006	-0.00899604	-0.0111164
	-1.32553e-15	0.900873	-5.73253	1.13068	-12.6874	0.446886	-20.1254	-0.241943	-27.3019	-0.928047	-33.475	-1.6037	-30.1307	-1.18021	-25.5104	-0.743435	-20.0864	-0.298284	-14.34	0.150225	-8.75595	0.597042	-3.81736	1.03714	-2.93017e-15	0.732776	6.90378e-18	-5.03606e-15	0	-3.0336e-15	0.61135	0.600582	0.38865	-0.488517
	-6.26775e-17	0.0579849	-0.0978963	0.110427	-0.315173	0.10364	-0.644492	0.0956859	-1.07726	0.0866545	-1.6037	0.0766472	-1.13193	0.077038	-0.743435	0.0765613	-0.437713	0.0752224	-0.213313	0.0730364	-0.0678709	0.070028	0.00186503	0.0662309	-1.06359e-16	0.030844	0	-2.48026e-16	0	-1.3926e-16	0.00452349	0.0386566	-0.00452349	-0.0205627
	-1.48909e-16	0.840968	-4.80105	1.13193	-10.8258	0.569167	-17.4659	-8.99281e-15	-24.1059	-0.569167	-30.1307	-1.13193	-34.9317	-1.68194	-30.1307	-1.13193	-24.1059	-0.569167	-17.4659	-9.65894e-15	-10.8258	0.569167	-4.80105	1.13193	-3.3324e-15	0.840968	5.08303e-18	-4.51652e-15	0	-2.77539e-15	0.5	0.560645	0.5	-0.560645
	4.70077e-17	0.044666	-0.0482875	0.0888289	-0.192606	0.0873256	-0.431331	0.0848389	-0.761774	0.0813968	-1.18021	0.077038	-1.68194	0.0718117	-1.18021	0.077038	-0.761774	0.0813968	-0.431331	0.0848389	-0.192606	0.0873256	-0.0482875	0.0888289	-1.41214e-16	0.044666	0	-1.82149e-16	0	-1.04118e-16	1.49653e-16	0.0297773	1.18896e-16	-0.0297773
	2.02612e-16	0.732776	-3.81736	1.03714	-8.75595	0.597042	-14.34	0.150225	-20.0864	-0.298284	-25.5104	-0.743435	-30.1307	-1.18021	-33.475	-1.6037	-27.3019	-0.928047	-20.1254	-0.241943	-12.6874	0.446886	-5.73253	1.13068	-3.58197e-15	0.900873	5.14144e-18	-3.80007e-15	0	-2.40462e-15	0.38865	0.488517	0.61135	-0.600582
	6.4838e-17	0.030844	0.00186503	0.0662309	-0.0678709	0.070028	-0.213313	0.0730364	-0.437713	0.0752224	-0.743435	0.0765613	-1.13193	0.077038	-1.6037	0.0766472	-1.07726	0.0866545	-0.644492	0.0956859	-0.315173	0.10364	-0.0978963	0.110427	-1.74479e-16	0.0579849	0	-1.14221e-16	0	-6.78033e-17	-0.00452349	0.0205627	0.00452349	-0.0386566
	2.64581e-16	0.591238	-2.83569	0.870747	-6.61273	0.549212	-10.9835	0.221492	-15.5937	-0.108723	-20.0864	-0.437713	-24.1059	-0.761774	-27.3019	-1.07726	-29.3332	-1.38061	-22.0882	-0.587329	-14.2083	0.212562	-6.55818	1.01006	-3.64291e-15	0.898092	5.19985e-18	-2.96013e-15	0	-1.96054e-15	0.282191	0.394159	0.717809	-0.598728
	5.14581e-17	0.0166747	0.0519966	0.042887	0.0576288	0.0519417	0.00710787	0.0604115	-0.108723	0.068201	-0.298284	0.0752224	-0.569167	0.0813968	-0.928047	0.0866545	-1.38061	0.0909364	-0.850395	0.105455	-0.43419	0.118787	-0.146403	0.130781	-2.0578e-16	0.0706509	0	-4.50063e-17	0	-3.07249e-17	-0.00899604	0.0111164	0.00899604	-0.0471006
	3.30954e-16	0.431674	-1.91023	0.657993	-4.53181	0.445228	-7.63472	0.227448	-10.9835	0.00710787	-14.34	-0.213313	-17.4659	-0.431331	-20.1254	-0.644492	-22.0882	-0.850395	-23.1317	-1.04672	-15.2598	-0.15018	-7.22556	0.748052	-3.48139e-15	0.818931	5.25826e-18	-2.07153e-15	0	-1.48325e-15	0.185457	0.287783	0.814543	-0.545954
	4.58369e-17	0.00231758	0.101543	0.0190602	0.18248	0.0332706	0.227448	0.0471063	0.221492	0.0604115	0.150225	0.0730364	5.65322e-16	0.0848389	-0.241943	0.0956859	-0.587329	0.105455	-1.04672	0.114037	-0.548318	0.132596	-0.19326	0.149662	-2.34763e-16	0.0825213	0	2.4715e-17	0	6.6995e-18	-0.0133673	0.00154505	0.0133673	-0.0550142
	3.33834e-16	0.269605	-1.09455	0.424633	-2.64817	0.305275	-4.53181	0.18248	-6.61273	0.0576288	-8.75595	-0.0678709	-10.8258	-0.192606	-12.6874	-0.315173	-14.2083	-0.43419	-15.2598	-0.548318	-15.7185	-0.65627	-7.684	0.324248	-3.06607e-15	0.650558	6.53049e-18	-1.20966e-15	0	-1.0132e-15	0.103175	0.179736	0.896825	-0.433705
	3.77632e-17	-0.0120656	0.149945	-0.0049813	0.305275	0.0142247	0.445228	0.0332706	0.549212	0.0519417	0.597042	0.070028	0.569167	0.0873256	0.446886	0.10364	0.212562	0.118787	-0.15018	0.132596	-0.65627	0.144913	-0.237942	0.166858	-2.61103e-16	0.0934624	1.68586e-19	9.41581e-17	0	4.40484e-17	-0.017588	-0.00804374	0.017588	-0.0623083
	2.92385e-16	0.120579	-0.440974	0.196659	-1.09455	0.149945	-1.91023	0.101543	-2.83569	0.0519966	-3.81736	0.00186503	-4.80105	-0.0482875	-5.73253	-0.0978963	-6.55818	-0.146403	-7.22556	-0.19326	-7.684	-0.237942	-7.88521	-0.279943	-2.36848e-15	0.381144	6.84743e-18	-4.49576e-16	0	-5.90774e-16	0.0399058	0.0803861	0.960094	-0.254096
	2.87778e-17	-0.0263129	0.196659	-0.0289667	0.424633	-0.0049813	0.657993	0.0190602	0.870747	0.042887	1.03714	0.0662309	1.13193	0.0888289	1.13068	0.110427	1.01006	0.130781	0.748052	0.149662	0.324248	0.166858	-0.279943	0.182175	-2.84502e-16	0.103351	2.27908e-19	1.62541e-16	0	8.09013e-17	-0.0216106	-0.017542	0.0216106	-0.0689006
	0	0	0	0	0	0	0	0	0	0	0	0	1.77636e-15	0	0	0	0	0	0	0	0	0	0	0	0	0	0	0	0	0	0	0	1	0
	-1.10629e-17	-0.0402639	0.241158	-0.0526259	0.539209	-0.0241312	0.863348	0.00463515	1.18248	0.0333493	1.46555	0.061688	1.68194	0.0893319	1.80175	0.11597	1.79618	0.141302	1.63786	0.165043	1.30112	0.186925	0.762288	0.206702	-1.15348e-16	0.112076	-6.76168e-19	2.10373e-16	0	1.52372e-16	-0.0253899	-0.0268426	0.0253899	-0.0747171
	-2.80425e-16	-0.0770506	0.180262	-0.139766	0.511624	-0.123857	0.976884	-0.106554	1.55734	-0.0880499	2.23298	-0.0685547	2.98274	-0.0482875	3.7847	-0.0274765	4.61636	-0.00635613	5.45489	0.0148359	6.27739	0.0358608	7.06112	0.0564818	7.78378	0.578774	-6.11644e-18	2.22146e-16	0	4.26048e-16	-0.0124572	-0.0513671	1.01246	0.334871
	-5.07791e-17	-0.0537615	0.282942	-0.0756924	0.647713	-0.0430094	1.05898	-0.00984207	1.48089	0.0234361	1.87746	0.0564504	2.21301	0.0888289	2.45252	0.120207	2.56208	0.150232	2.50923	0.178564	2.26333	0.204886	1.79594	0.228901	1.08108	0.1308	-1.57263e-18	2.55836e-16	0	2.22127e-16	-0.0288833	-0.035841	0.0288833	-0.0796922
	13.5	0.342764	25.9225	0.583487	24.2143	0.474876	21.9927	0.360917	19.3808	0.242893	16.5064	0.122134	13.5	4.33795e-15	10.4936	-0.122134	7.61916	-0.242893	5.00735	-0.360917	2.78571	-0.474876	1.07746	-0.583487	1.30338e-16	-0.342764	1	2.03163e-15	0	1.46941e-15	0.0908172	0.228509	-0.0908172	0.228509
	1.61958e-15	1.00868	6.8606	1.86032	11.71	1.68232	14.7408	1.48538	16.1656	1.27172	16.2157	1.04373	15.1374	0.803987	13.19	0.555192	10.6423	0.300144	7.77014	0.0417164	4.85289	-0.217181	2.17042	-0.473633	-2.96014e-15	-0.362375	-1.88254e-18	9	0	1.48007e-15	0.228509	0.672454	-0.228509	0.241584
	-9.93466e-16	-0.342764	1.07746	-0.583487	2.78571	-0.474876	5.00735	-0.360917	7.61916	-0.242893	10.4936	-0.122134	13.5	4.84976e-15	16.5064	0.122134	19.3808	0.242893	21.9927	0.360917	24.2143	0.474876	25.9225	0.583487	13.5	0.342764	-2.24842e-17	1.16502e-15	1	1.76355e-15	-0.0908172	-0.228509	0.0908172	-0.228509
	7.18915e-16	0.483854	-2.54648	0.681232	-5.82942	0.387085	-9.53083	0.0885786	-13.328	-0.210925	-16.8972	-0.508053	-19.9171	-0.79946	-22.0727	-1.08186	-23.0587	-1.35209	-22.583	-1.60708	-20.37	-1.84398	-16.1634	-2.06011	-9.72973	-1.1772	1.40195e-17	-1.87596e-15	0	9	0.25995	0.322569	-0.25995	0.71723
																												0.0908172	0.228509	-0.0908172	0.228509		TTB =	0.0908172
																												0.228509	0.672454	-0.228509	0.241584		QTB =	0.228509
																												-0.0908172	-0.228509	0.0908172	-0.228509		STB =	0.672454
																												0.25995	0.322569	-0.25995	0.71723		CTB =	0.241584
		4 x 4 Element stiffness matrix with W-FDM aprroximation
			M-W FDM approximation
			Seventeen-point grid
		Beam length l =	4	m
		hk =	0.25	m			The governing equations
		a = EI/kGAl²=	0.05
		blk =	0.0625
		Coefficient of axial force k =	-1.5
			-0.00585938
	W0	h²M0	W1	h²M1	W2	h²M2	W3	h²M3	W4	h²M4	W5	h²M5	W6	h²M6	W7	h²M7	W8	h²M8	W9	h²M9	W10	h²M10	W11	h²M11	W12	h²M12	W13	h²M13	W14	h²M14	W15	h²M15	W16	h²M16	W17	h²M17	W18	h²M18	Ti	Mi	Tk	Mk
Gov Eq 1 (1)	-0.00585938	1	0.0117188	-2	-0.00585938	1	0	0	0	0	0	0	0	0	0	0	0	0	0	0	0	0	0	0	0	0	0	0	0	0	0	0	0	0	0	0	0	0	0	0	0	0
Gov Eq 2 (1)	1	-12.8	-2	26.6	1	-12.8	0	0	0	0	0	0	0	0	0	0	0	0	0	0	0	0	0	0	0	0	0	0	0	0	0	0	0	0	0	0	0	0	0	0	0	0
Gov Eq 1 (2)	0	0	-0.00585938	1	0.0117188	-2	-0.00585938	1	0	0	0	0	0	0	0	0	0	0	0	0	0	0	0	0	0	0	0	0	0	0	0	0	0	0	0	0	0	0	0	0	0	0
Gov Eq 2 (2)	0	0	1	-12.8	-2	26.6	1	-12.8	0	0	0	0	0	0	0	0	0	0	0	0	0	0	0	0	0	0	0	0	0	0	0	0	0	0	0	0	0	0	0	0	0	0
Gov Eq 1 (3)	0	0	0	0	-0.00585938	1	0.0117188	-2	-0.00585938	1	0	0	0	0	0	0	0	0	0	0	0	0	0	0	0	0	0	0	0	0	0	0	0	0	0	0	0	0	0	0	0	0
Gov Eq 2 (3)	0	0	0	0	1	-12.8	-2	26.6	1	-12.8	0	0	0	0	0	0	0	0	0	0	0	0	0	0	0	0	0	0	0	0	0	0	0	0	0	0	0	0	0	0	0	0
Gov Eq 1 (4)	0	0	0	0	0	0	-0.00585938	1	0.0117188	-2	-0.00585938	1	0	0	0	0	0	0	0	0	0	0	0	0	0	0	0	0	0	0	0	0	0	0	0	0	0	0	0	0	0	0
Gov Eq 2 (4)	0	0	0	0	0	0	1	-12.8	-2	26.6	1	-12.8	0	0	0	0	0	0	0	0	0	0	0	0	0	0	0	0	0	0	0	0	0	0	0	0	0	0	0	0	0	0
Gov Eq 1 (5)	0	0	0	0	0	0	0	0	-0.00585938	1	0.0117188	-2	-0.00585938	1	0	0	0	0	0	0	0	0	0	0	0	0	0	0	0	0	0	0	0	0	0	0	0	0	0	0	0	0
Gov Eq 2 (5)	0	0	0	0	0	0	0	0	1	-12.8	-2	26.6	1	-12.8	0	0	0	0	0	0	0	0	0	0	0	0	0	0	0	0	0	0	0	0	0	0	0	0	0	0	0	0
Gov Eq 1 (6)	0	0	0	0	0	0	0	0	0	0	-0.00585938	1	0.0117188	-2	-0.00585938	1	0	0	0	0	0	0	0	0	0	0	0	0	0	0	0	0	0	0	0	0	0	0	0	0	0	0
Gov Eq 2 (6)	0	0	0	0	0	0	0	0	0	0	1	-12.8	-2	26.6	1	-12.8	0	0	0	0	0	0	0	0	0	0	0	0	0	0	0	0	0	0	0	0	0	0	0	0	0	0
Gov Eq 1 (7)	0	0	0	0	0	0	0	0	0	0	0	0	-0.00585938	1	0.0117188	-2	-0.00585938	1	0	0	0	0	0	0	0	0	0	0	0	0	0	0	0	0	0	0	0	0	0	0	0	0
Gov Eq 2 (7)	0	0	0	0	0	0	0	0	0	0	0	0	1	-12.8	-2	26.6	1	-12.8	0	0	0	0	0	0	0	0	0	0	0	0	0	0	0	0	0	0	0	0	0	0	0	0
Gov Eq 1 (8)	0	0	0	0	0	0	0	0	0	0	0	0	0	0	-0.00585938	1	0.0117188	-2	-0.00585938	1	0	0	0	0	0	0	0	0	0	0	0	0	0	0	0	0	0	0	0	0	0	0
Gov Eq 2 (8)	0	0	0	0	0	0	0	0	0	0	0	0	0	0	1	-12.8	-2	26.6	1	-12.8	0	0	0	0	0	0	0	0	0	0	0	0	0	0	0	0	0	0	0	0	0	0
Gov Eq 1 (9)	0	0	0	0	0	0	0	0	0	0	0	0	0	0	0	0	-0.00585938	1	0.0117188	-2	-0.00585938	1	0	0	0	0	0	0	0	0	0	0	0	0	0	0	0	0	0	0	0	0
Gov Eq 2 (9)	0	0	0	0	0	0	0	0	0	0	0	0	0	0	0	0	1	-12.8	-2	26.6	1	-12.8	0	0	0	0	0	0	0	0	0	0	0	0	0	0	0	0	0	0	0	0
Gov Eq 1 (10)	0	0	0	0	0	0	0	0	0	0	0	0	0	0	0	0	0	0	-0.00585938	1	0.0117188	-2	-0.00585938	1	0	0	0	0	0	0	0	0	0	0	0	0	0	0	0	0	0	0
Gov Eq 2 (10)	0	0	0	0	0	0	0	0	0	0	0	0	0	0	0	0	0	0	1	-12.8	-2	26.6	1	-12.8	0	0	0	0	0	0	0	0	0	0	0	0	0	0	0	0	0	0
Gov Eq 1 (11)	0	0	0	0	0	0	0	0	0	0	0	0	0	0	0	0	0	0	0	0	-0.00585938	1	0.0117188	-2	-0.00585938	1	0	0	0	0	0	0	0	0	0	0	0	0	0	0	0	0
Gov Eq 2 (11)	0	0	0	0	0	0	0	0	0	0	0	0	0	0	0	0	0	0	0	0	1	-12.8	-2	26.6	1	-12.8	0	0	0	0	0	0	0	0	0	0	0	0	0	0	0	0
Gov Eq 1 (12)	0	0	0	0	0	0	0	0	0	0	0	0	0	0	0	0	0	0	0	0	0	0	-0.00585938	1	0.0117188	-2	-0.00585938	1	0	0	0	0	0	0	0	0	0	0	0	0	0	0
Gov Eq 2 (12)	0	0	0	0	0	0	0	0	0	0	0	0	0	0	0	0	0	0	0	0	0	0	1	-12.8	-2	26.6	1	-12.8	0	0	0	0	0	0	0	0	0	0	0	0	0	0
Gov Eq 1 (13)	0	0	0	0	0	0	0	0	0	0	0	0	0	0	0	0	0	0	0	0	0	0	0	0	-0.00585938	1	0.0117188	-2	-0.00585938	1	0	0	0	0	0	0	0	0	0	0	0	0
Gov Eq 2 (13)	0	0	0	0	0	0	0	0	0	0	0	0	0	0	0	0	0	0	0	0	0	0	0	0	1	-12.8	-2	26.6	1	-12.8	0	0	0	0	0	0	0	0	0	0	0	0
Gov Eq 1 (14)	0	0	0	0	0	0	0	0	0	0	0	0	0	0	0	0	0	0	0	0	0	0	0	0	0	0	-0.00585938	1	0.0117188	-2	-0.00585938	1	0	0	0	0	0	0	0	0	0	0
Gov Eq 2 (14)	0	0	0	0	0	0	0	0	0	0	0	0	0	0	0	0	0	0	0	0	0	0	0	0	0	0	1	-12.8	-2	26.6	1	-12.8	0	0	0	0	0	0	0	0	0	0
Gov Eq 1 (15)	0	0	0	0	0	0	0	0	0	0	0	0	0	0	0	0	0	0	0	0	0	0	0	0	0	0	0	0	-0.00585938	1	0.0117188	-2	-0.00585938	1	0	0	0	0	0	0	0	0
Gov Eq 2 (15)	0	0	0	0	0	0	0	0	0	0	0	0	0	0	0	0	0	0	0	0	0	0	0	0	0	0	0	0	1	-12.8	-2	26.6	1	-12.8	0	0	0	0	0	0	0	0
Gov Eq 1 (16)	0	0	0	0	0	0	0	0	0	0	0	0	0	0	0	0	0	0	0	0	0	0	0	0	0	0	0	0	0	0	-0.00585938	1	0.0117188	-2	-0.00585938	1	0	0	0	0	0	0
Gov Eq 2 (16)	0	0	0	0	0	0	0	0	0	0	0	0	0	0	0	0	0	0	0	0	0	0	0	0	0	0	0	0	0	0	1	-12.8	-2	26.6	1	-12.8	0	0	0	0	0	0
Gov Eq 1 (17)	0	0	0	0	0	0	0	0	0	0	0	0	0	0	0	0	0	0	0	0	0	0	0	0	0	0	0	0	0	0	0	0	-0.00585938	1	0.0117188	-2	-0.00585938	1	0	0	0	0
Gov Eq 2 (17)	0	0	0	0	0	0	0	0	0	0	0	0	0	0	0	0	0	0	0	0	0	0	0	0	0	0	0	0	0	0	0	0	1	-12.8	-2	26.6	1	-12.8	0	0	0	0
StaBoCo 1 (1)	0.1875	-32	0	0	-0.1875	32	0	0	0	0	0	0	0	0	0	0	0	0	0	0	0	0	0	0	0	0	0	0	0	0	0	0	0	0	0	0	0	0	1	0	0	0
StaBoCo 2 (1)	0	0	0	-1	0	0	0	0	0	0	0	0	0	0	0	0	0	0	0	0	0	0	0	0	0	0	0	0	0	0	0	0	0	0	0	0	0	0	0	0.0625	0	0
StaBoCo 1 (17)	0	0	0	0	0	0	0	0	0	0	0	0	0	0	0	0	0	0	0	0	0	0	0	0	0	0	0	0	0	0	0	0	-0.1875	32	0	0	0.1875	-32	0	0	1	0
StaBoCo 2 (17)	0	0	0	0	0	0	0	0	0	0	0	0	0	0	0	0	0	0	0	0	0	0	0	0	0	0	0	0	0	0	0	0	0	0	0	0	0	1	0	0	0	0.0625
GeoBoCo 1 (1)	0	0	1	0	0	0	0	0	0	0	0	0	0	0	0	0	0	0	0	0	0	0	0	0	0	0	0	0	0	0	0	0	0	0	0	0	0	0	0	0	0	0
GeoBoCo 2 (1)	-2	25.6	0	0	2	-25.6	0	0	0	0	0	0	0	0	0	0	0	0	0	0	0	0	0	0	0	0	0	0	0	0	0	0	0	0	0	0	0	0	0	0	0	0
GeoBoCo 1 (17)	0	0	0	0	0	0	0	0	0	0	0	0	0	0	0	0	0	0	0	0	0	0	0	0	0	0	0	0	0	0	0	0	0	0	1	0	0	0	0	0	0	0
GeoBoCo 2 (17)	0	0	0	0	0	0	0	0	0	0	0	0	0	0	0	0	0	0	0	0	0	0	0	0	0	0	0	0	0	0	0	0	-2	25.6	0	0	2	-25.6	0	0	0	0
							Inverse matrix
	13.8378	0.59416	13.0298	0.0905288	12.1239	0.0732456	11.1388	0.0554985	10.0937	0.0373997	9.00816	0.0190641	7.90202	0.000607699	6.79522	-0.0178525	5.70773	-0.0361997	4.65937	-0.0543176	3.66973	-0.0720913	2.75803	-0.0894085	1.94298	-0.106159	1.2427	-0.122238	0.674575	-0.137542	0.255139	-0.151974	-3.01618e-15	-0.0827222	0	0	0	0	1.01198	-0.243461	-0.0119751	0.0413611
	1.08108	0.0948926	1.84057	0.172074	2.41403	0.159608	2.81494	0.14613	3.05787	0.131727	3.1584	0.116489	3.13299	0.100513	2.99892	0.0839011	2.77415	0.0667573	2.4772	0.0491907	2.12708	0.0313125	1.7431	0.0132359	1.34482	-0.00492451	0.95186	-0.0230537	0.583822	-0.0410369	0.260149	-0.0587602	-5.40224e-16	-0.0380556	0	0	0	0	0.0158267	0.0442791	-0.0158267	0.0190278
	0	0	0	0	8.88178e-16	2.22045e-16	-1.77636e-15	0	3.55271e-15	0	3.55271e-15	0	3.55271e-15	0	0	0	3.55271e-15	1.11022e-16	3.55271e-15	0	3.55271e-15	0	0	5.55112e-17	-1.77636e-15	0	0	-6.93889e-18	0	0	0	0	1.97215e-31	0	0	0	0	0	1	0	0	0
	0	0.0842455	0.79169	0.158799	1.41171	0.1481	1.87161	0.136464	2.18399	0.123963	2.36236	0.110676	2.42107	0.096689	2.37526	0.0820892	2.2407	0.0669694	2.03375	0.0514255	1.77119	0.0355557	1.4702	0.0194608	1.14817	0.00324252	0.822639	-0.0129963	0.511154	-0.0291527	0.231185	-0.0451245	-2.93135e-16	-0.0304052	0	0	0	0	0.0143313	0.0421228	-0.0143313	0.0152026
	0	0.395845	-13.8857	-0.262203	-13.65	-0.233354	-13.1621	-0.203027	-12.4548	-0.171413	-11.5621	-0.138714	-10.5194	-0.105136	-9.36307	-0.0708926	-8.13011	-0.0361997	-6.85801	-0.00127754	-5.58453	0.0336527	-4.34744	0.0683698	-3.18425	0.102654	-2.13204	0.136288	-1.22717	0.169058	-0.505069	0.200758	3.33308e-15	0.115593	0	0	0	0	0.972532	0.197922	0.0274685	-0.0577963
	0	0.0793993	-0.262203	0.144517	0.400441	0.135654	0.916431	0.125933	1.29628	0.115413	1.55135	0.104163	1.69382	0.0922521	1.73656	0.0797573	1.69307	0.0667573	1.57741	0.0533345	1.40409	0.0395737	1.18799	0.0255623	0.944255	0.011389	0.688207	-0.00285646	0.435248	-0.0170838	0.200758	-0.031203	-4.41881e-17	-0.0225622	0	0	0	0	0.0127452	0.0396996	-0.0127452	0.0112811
	0	0.705853	-13.65	0.400441	-27.733	-0.613361	-27.315	-0.542197	-26.3109	-0.467598	-24.8013	-0.390036	-22.8699	-0.310005	-20.6035	-0.228009	-18.0906	-0.144569	-15.4213	-0.060214	-12.687	0.024523	-9.97918	0.109105	-7.38932	0.192995	-5.00809	0.275663	-2.92489	0.356585	-1.22717	0.435248	4.49873e-15	0.255577	0	0	0	0	0.931284	0.352926	0.0687155	-0.127788
	0	0.0740501	-0.233354	0.135654	-0.613361	0.12235	-0.0445573	0.114604	0.40035	0.106133	0.73052	0.096989	0.955836	0.0872309	1.08685	0.0769203	1.1347	0.0661224	1.11108	0.0549056	1.02809	0.0433411	0.898251	0.031502	0.734355	0.0194634	0.549416	0.00730143	0.356585	-0.00490674	0.169058	-0.0170838	3.19752e-17	-0.0145764	0	0	0	0	0.0110783	0.037025	-0.0110783	0.00728818
	0	0.935807	-13.1621	0.916431	-27.315	-0.0445573	-41.4197	-1.00526	-40.5998	-0.87852	-38.8302	-0.746212	-36.2538	-0.609177	-33.0189	-0.468283	-29.2777	-0.324423	-25.1858	-0.178508	-20.9009	-0.0314619	-16.582	0.115783	-12.3883	0.262295	-8.47811	0.407145	-5.00809	0.549416	-2.13204	0.688207	5.62981e-15	0.411319	0	0	0	0	0.878061	0.467903	0.121939	-0.20566
	0	0.0682318	-0.203027	0.125933	-0.542197	0.114604	-1.00526	0.10255	-0.498113	0.09618	-0.0949409	0.0892011	0.211797	0.0816571	0.430258	0.0735959	0.569155	0.0650685	0.637708	0.056129	0.645581	0.0468339	0.602823	0.0372421	0.519803	0.0274144	0.407145	0.0174131	0.275663	0.00730143	0.136288	-0.00285646	1.07936e-16	-0.00649813	0	0	0	0	0.00934124	0.0341159	-0.00934124	0.00324906
	0	1.092	-12.4548	1.29628	-26.3109	0.40035	-40.5998	-0.498113	-54.3503	-1.39342	-52.7565	-1.19882	-49.8667	-0.996627	-45.8995	-0.78812	-41.0802	-0.574621	-35.6397	-0.357482	-29.8128	-0.138078	-23.8365	0.0822002	-17.9492	0.301958	-12.3883	0.519803	-7.38932	0.734355	-3.18425	0.944255	6.6442e-15	0.574087	0	0	0	0	0.814739	0.545998	0.185261	-0.287044
	0	0.0619813	-0.171413	0.115413	-0.467598	0.106133	-0.87852	0.09618	-1.39342	0.085618	-0.9198	0.0808481	-0.533583	0.0755661	-0.229059	0.0698054	-3.82564e-15	0.0636025	0.160299	0.0569968	0.258981	0.05003	0.303575	0.0427463	0.301958	0.0351918	0.262295	0.0274144	0.192995	0.0194634	0.102654	0.011389	1.83213e-16	0.00162126	0	0	0	0	0.007545	0.0309906	-0.007545	-0.00081063
	0	1.18118	-11.5621	1.55135	-24.8013	0.73052	-38.8302	-0.0949409	-52.7565	-0.9198	-65.6884	-1.73883	-62.9027	-1.46577	-58.5324	-1.18342	-52.8827	-0.893578	-46.2669	-0.598074	-39.0046	-0.298781	-31.4193	0.00240491	-23.8365	0.303575	-16.582	0.602823	-9.97918	0.898251	-4.34744	1.18799	6.03071e-15	0.735102	0	0	0	0	0.74326	0.59059	0.25674	-0.367551
	0	0.0553382	-0.138714	0.104163	-0.390036	0.096989	-0.746212	0.0892011	-1.19882	0.0808481	-1.73883	0.071983	-1.27558	0.0689964	-0.886924	0.0655727	-0.569155	0.0617336	-0.318125	0.0575035	-0.12926	0.0529092	0.00240491	0.0479797	0.0822002	0.0427463	0.115783	0.0372421	0.109105	0.031502	0.0683698	0.0255623	1.45625e-16	0.00973038	0	0	0	0	0.00570097	0.0276691	-0.00570097	-0.00486519
	0	1.21054	-10.5194	1.69382	-22.8699	0.955836	-36.2538	0.211797	-49.8667	-0.533583	-62.9027	-1.27558	-74.5597	-2.0095	-70.2064	-1.64961	-64.0698	-1.27927	-56.5502	-0.900831	-48.0567	-0.516682	-39.0046	-0.12926	-29.8128	0.258981	-20.9009	0.645581	-12.687	1.02809	-5.58453	1.40409	5.25979e-15	0.885597	0	0	0	0	0.665618	0.605269	0.334382	-0.442799
	0	0.0483445	-0.105136	0.0922521	-0.310005	0.0872309	-0.609177	0.0816571	-0.996627	0.0755661	-1.46577	0.0689964	-2.0095	0.0619896	-1.53917	0.0609246	-1.1347	0.0594737	-0.794534	0.0576461	-0.516682	0.0554533	-0.298781	0.0529092	-0.138078	0.05003	-0.0314619	0.0468339	0.024523	0.0433411	0.0336527	0.0395737	1.07115e-16	0.0177779	0	0	0	0	0.00382083	0.0241722	-0.00382083	-0.00888893
	0	1.18763	-9.36307	1.73656	-20.6035	1.08685	-33.0189	0.430258	-45.8995	-0.229059	-58.5324	-0.886924	-70.2064	-1.53917	-80.2166	-2.18167	-74.0303	-1.72927	-65.9745	-1.26591	-56.5502	-0.794534	-46.2669	-0.318125	-35.6397	0.160299	-25.1858	0.637708	-15.4213	1.11108	-6.85801	1.57741	4.37306e-15	1.01687	0	0	0	0	0.583845	0.593816	0.416155	-0.508437
	0	0.0410446	-0.0708926	0.0797573	-0.228009	0.0769203	-0.468283	0.0735959	-0.78812	0.0698054	-1.18342	0.0655727	-1.64961	0.0609246	-2.18167	0.0558906	-1.69307	0.056837	-1.26591	0.0574234	-0.900831	0.0576461	-0.598074	0.0575035	-0.357482	0.0569968	-0.178508	0.056129	-0.060214	0.0549056	-0.00127754	0.0533345	6.79269e-17	0.0257127	0	0	0	0	0.00191648	0.0205223	-0.00191648	-0.0128564
	0	1.12035	-8.13011	1.69307	-18.0906	1.1347	-29.2777	0.569155	-41.0802	-8.21565e-15	-52.8827	-0.569155	-64.0698	-1.1347	-74.0303	-1.69307	-82.1604	-2.2407	-74.0303	-1.69307	-64.0698	-1.1347	-52.8827	-0.569155	-41.0802	-1.64313e-14	-29.2777	0.569155	-18.0906	1.1347	-8.13011	1.69307	3.4129e-15	1.12035	0	0	0	0	0.5	0.560176	0.5	-0.560176
	0	0.0334847	-0.0361997	0.0667573	-0.144569	0.0661224	-0.324423	0.0650685	-0.574621	0.0636025	-0.893578	0.0617336	-1.27927	0.0594737	-1.72927	0.056837	-2.2407	0.0538403	-1.72927	0.056837	-1.27927	0.0594737	-0.893578	0.0617336	-0.574621	0.0636025	-0.324423	0.0650685	-0.144569	0.0661224	-0.0361997	0.0667573	2.8308e-17	0.0334847	0	0	0	0	2.29649e-17	0.0167424	1.78924e-17	-0.0167424
	0	1.01687	-6.85801	1.57741	-15.4213	1.11108	-25.1858	0.637708	-35.6397	0.160299	-46.2669	-0.318125	-56.5502	-0.794534	-65.9745	-1.26591	-74.0303	-1.72927	-80.2166	-2.18167	-70.2064	-1.53917	-58.5324	-0.886924	-45.8995	-0.229059	-33.0189	0.430258	-20.6035	1.08685	-9.36307	1.73656	2.42214e-15	1.18763	0	0	0	0	0.416155	0.508437	0.583845	-0.593816
	0	0.0257127	-0.00127754	0.0533345	-0.060214	0.0549056	-0.178508	0.056129	-0.357482	0.0569968	-0.598074	0.0575035	-0.900831	0.0576461	-1.26591	0.0574234	-1.69307	0.056837	-2.18167	0.0558906	-1.64961	0.0609246	-1.18342	0.0655727	-0.78812	0.0698054	-0.468283	0.0735959	-0.228009	0.0769203	-0.0708926	0.0797573	-1.14901e-17	0.0410446	0	0	0	0	-0.00191648	0.0128564	0.00191648	-0.0205223
	0	0.885597	-5.58453	1.40409	-12.687	1.02809	-20.9009	0.645581	-29.8128	0.258981	-39.0046	-0.12926	-48.0567	-0.516682	-56.5502	-0.900831	-64.0698	-1.27927	-70.2064	-1.64961	-74.5597	-2.0095	-62.9027	-1.27558	-49.8667	-0.533583	-36.2538	0.211797	-22.8699	0.955836	-10.5194	1.69382	1.4438e-15	1.21054	0	0	0	0	0.334382	0.442799	0.665618	-0.605269
	0	0.0177779	0.0336527	0.0395737	0.024523	0.0433411	-0.0314619	0.0468339	-0.138078	0.05003	-0.298781	0.0529092	-0.516682	0.0554533	-0.794534	0.0576461	-1.1347	0.0594737	-1.53917	0.0609246	-2.0095	0.0619896	-1.46577	0.0689964	-0.996627	0.0755661	-0.609177	0.0816571	-0.310005	0.0872309	-0.105136	0.0922521	-5.12155e-17	0.0483445	0	0	0	0	-0.00382083	0.00888893	0.00382083	-0.0241722
	0	0.735102	-4.34744	1.18799	-9.97918	0.898251	-16.582	0.602823	-23.8365	0.303575	-31.4193	0.00240491	-39.0046	-0.298781	-46.2669	-0.598074	-52.8827	-0.893578	-58.5324	-1.18342	-62.9027	-1.46577	-65.6884	-1.73883	-52.7565	-0.9198	-38.8302	-0.0949409	-24.8013	0.73052	-11.5621	1.55135	5.20832e-16	1.18118	0	0	0	0	0.25674	0.367551	0.74326	-0.59059
	0	0.00973038	0.0683698	0.0255623	0.109105	0.031502	0.115783	0.0372421	0.0822002	0.0427463	0.00240491	0.0479797	-0.12926	0.0529092	-0.318125	0.0575035	-0.569155	0.0617336	-0.886924	0.0655727	-1.27558	0.0689964	-1.73883	0.071983	-1.19882	0.0808481	-0.746212	0.0892011	-0.390036	0.096989	-0.138714	0.104163	-9.06165e-17	0.0553382	0	0	0	0	-0.00570097	0.00486519	0.00570097	-0.0276691
	0	0.574087	-3.18425	0.944255	-7.38932	0.734355	-12.3883	0.519803	-17.9492	0.301958	-23.8365	0.0822002	-29.8128	-0.138078	-35.6397	-0.357482	-41.0802	-0.574621	-45.8995	-0.78812	-49.8667	-0.996627	-52.7565	-1.19882	-54.3503	-1.39342	-40.5998	-0.498113	-26.3109	0.40035	-12.4548	1.29628	-3.04175e-16	1.092	0	0	0	0	0.185261	0.287044	0.814739	-0.545998
	0	0.00162126	0.102654	0.011389	0.192995	0.0194634	0.262295	0.0274144	0.301958	0.0351918	0.303575	0.0427463	0.258981	0.05003	0.160299	0.0569968	-1.19868e-15	0.0636025	-0.229059	0.0698054	-0.533583	0.0755661	-0.9198	0.0808481	-1.39342	0.085618	-0.87852	0.09618	-0.467598	0.106133	-0.171413	0.115413	-1.29443e-16	0.0619813	0	0	0	0	-0.007545	0.00081063	0.007545	-0.0309906
	0	0.411319	-2.13204	0.688207	-5.00809	0.549416	-8.47811	0.407145	-12.3883	0.262295	-16.582	0.115783	-20.9009	-0.0314619	-25.1858	-0.178508	-29.2777	-0.324423	-33.0189	-0.468283	-36.2538	-0.609177	-38.8302	-0.746212	-40.5998	-0.87852	-41.4197	-1.00526	-27.315	-0.0445573	-13.1621	0.916431	-9.89244e-16	0.935807	0	0	0	0	0.121939	0.20566	0.878061	-0.467903
	0	-0.00649813	0.136288	-0.00285646	0.275663	0.00730143	0.407145	0.0174131	0.519803	0.0274144	0.602823	0.0372421	0.645581	0.0468339	0.637708	0.056129	0.569155	0.0650685	0.430258	0.0735959	0.211797	0.0816571	-0.0949409	0.0892011	-0.498113	0.09618	-1.00526	0.10255	-0.542197	0.114604	-0.203027	0.125933	-1.6745e-16	0.0682318	0	0	0	0	-0.00934124	-0.00324906	0.00934124	-0.0341159
	0	0.255577	-1.22717	0.435248	-2.92489	0.356585	-5.00809	0.275663	-7.38932	0.192995	-9.97918	0.109105	-12.687	0.024523	-15.4213	-0.060214	-18.0906	-0.144569	-20.6035	-0.228009	-22.8699	-0.310005	-24.8013	-0.390036	-26.3109	-0.467598	-27.315	-0.542197	-27.733	-0.613361	-13.65	0.400441	-1.49328e-15	0.705853	0	0	0	0	0.0687155	0.127788	0.931284	-0.352926
	0	-0.0145764	0.169058	-0.0170838	0.356585	-0.00490674	0.549416	0.00730143	0.734355	0.0194634	0.898251	0.031502	1.02809	0.0433411	1.11108	0.0549056	1.1347	0.0661224	1.08685	0.0769203	0.955836	0.0872309	0.73052	0.096989	0.40035	0.106133	-0.0445573	0.114604	-0.613361	0.12235	-0.233354	0.135654	-2.04397e-16	0.0740501	0	0	0	0	-0.0110783	-0.00728818	0.0110783	-0.037025
	0	0.115593	-0.505069	0.200758	-1.22717	0.169058	-2.13204	0.136288	-3.18425	0.102654	-4.34744	0.0683698	-5.58453	0.0336527	-6.85801	-0.00127754	-8.13011	-0.0361997	-9.36307	-0.0708926	-10.5194	-0.105136	-11.5621	-0.138714	-12.4548	-0.171413	-13.1621	-0.203027	-13.65	-0.233354	-13.8857	-0.262203	-1.77636e-15	0.395845	0	0	0	0	0.0274685	0.0577963	0.972532	-0.197922
	0	-0.0225622	0.200758	-0.031203	0.435248	-0.0170838	0.688207	-0.00285646	0.944255	0.011389	1.18799	0.0255623	1.40409	0.0395737	1.57741	0.0533345	1.69307	0.0667573	1.73656	0.0797573	1.69382	0.0922521	1.55135	0.104163	1.29628	0.115413	0.916431	0.125933	0.400441	0.135654	-0.262203	0.144517	-2.40048e-16	0.0793993	0	0	0	0	-0.0127452	-0.0112811	0.0127452	-0.0396996
	0	-5.55112e-17	0	0	0	0	0	0	0	0	0	0	0	5.55112e-17	0	0	7.10543e-15	-1.11022e-16	-7.10543e-15	0	0	0	0	0	0	0	0	0	0	0	0	0	0	0	0	0	0	0	0	-2.77556e-17	1	0
	0	-0.0304052	0.231185	-0.0451245	0.511154	-0.0291527	0.822639	-0.0129963	1.14817	0.00324252	1.4702	0.0194608	1.77119	0.0355557	2.03375	0.0514255	2.2407	0.0669694	2.37526	0.0820892	2.42107	0.096689	2.36236	0.110676	2.18399	0.123963	1.87161	0.136464	1.41171	0.1481	0.79169	0.158799	-1.33561e-16	0.0842455	0	0	0	0	-0.0143313	-0.0152026	0.0143313	-0.0421228
	0	-0.0827222	0.255139	-0.151974	0.674575	-0.137542	1.2427	-0.122238	1.94298	-0.106159	2.75803	-0.0894085	3.66973	-0.0720913	4.65937	-0.0543176	5.70773	-0.0361997	6.79522	-0.0178525	7.90202	0.000607699	9.00816	0.0190641	10.0937	0.0373997	11.1388	0.0554985	12.1239	0.0732456	13.0298	0.0905288	13.8378	0.59416	0	0	0	0	-0.0119751	-0.0413611	1.01198	0.243461
	0	-0.0380556	0.260149	-0.0587602	0.583822	-0.0410369	0.95186	-0.0230537	1.34482	-0.00492451	1.7431	0.0132359	2.12708	0.0313125	2.4772	0.0491907	2.77415	0.0667573	2.99892	0.0839011	3.13299	0.100513	3.1584	0.116489	3.05787	0.131727	2.81494	0.14613	2.41403	0.159608	1.84057	0.172074	1.08108	0.0948926	0	0	0	0	-0.0158267	-0.0190278	0.0158267	-0.0442791
	32	0.458603	62.242	0.815692	59.6022	0.709011	56.1959	0.597839	52.1433	0.48288	47.5686	0.364862	42.5995	0.244533	37.3661	0.122655	32	7.05697e-15	26.6339	-0.122655	21.4005	-0.244533	16.4314	-0.364862	11.8567	-0.48288	7.8041	-0.597839	4.39779	-0.709011	1.75798	-0.815692	-1.46827e-14	-0.458603	1	0	0	0	0.0912133	0.229302	-0.0912133	0.229302
	0	1.34793	12.667	2.54078	22.5873	2.3696	29.9458	2.18342	34.9439	1.9834	37.7977	1.77082	38.7372	1.54702	38.0042	1.31343	35.8513	1.07151	32.54	0.822807	28.3391	0.568892	23.5233	0.311372	18.3708	0.0518803	13.1622	-0.20794	8.17846	-0.466443	3.69897	-0.721992	-1.11664e-14	-0.486484	0	16	0	0	0.229302	0.673964	-0.229302	0.243242
	0	-0.458603	1.75798	-0.815692	4.39779	-0.709011	7.8041	-0.597839	11.8567	-0.48288	16.4314	-0.364862	21.4005	-0.244533	26.6339	-0.122655	32	7.03952e-15	37.3661	0.122655	42.5995	0.244533	47.5686	0.364862	52.1433	0.48288	56.1959	0.597839	59.6022	0.709011	62.242	0.815692	32	0.458603	0	0	1	0	-0.0912133	-0.229302	0.0912133	-0.229302
	0	0.60889	-4.16238	0.940163	-9.34115	0.656591	-15.2298	0.36886	-21.5171	0.0787921	-27.8897	-0.211775	-34.0333	-0.501	-39.6353	-0.787051	-44.3864	-1.06812	-47.9828	-1.34242	-50.1279	-1.60821	-50.5344	-1.86382	-48.926	-2.10763	-45.0391	-2.33808	-38.6245	-2.55372	-29.4491	-2.75319	-17.2973	-1.51828	0	0	0	16	0.253228	0.304445	-0.253228	0.708465
																																				0.0912133	0.229302	-0.0912133	0.229302		TTB =	0.0912133
																																				0.229302	0.673964	-0.229302	0.243242		QTB =	0.229302
																																				-0.0912133	-0.229302	0.0912133	-0.229302		STB =	0.673964
																																				0.253228	0.304445	-0.253228	0.708465		CTB =	0.243242
