# Supplementary material for: Timoshenko Beam Theory:First-Order Analysis, Second-Order Analysis, Stability, and Vibration Analysis Using the Finite Difference Method
Source: Preprints.org preprint supplement (doi:10.20944/preprints202105.0252.v1), 2021-05-11
Supplement: Supplementary file 6 [file Tapered pinned fixed beam subjected to a uniformly distributed load.xlsx]

## Sheet: CBT Tapered beam
		Tapered beam subjected to a uniformly distributed load
			Classical Beam Theory
		L0 =	2	m				0.444211				1.66667
		L =	8	m
		p =	10	kN/m
			0.02					1.23473				4.99917
		Moment at the fixed end
				2400.8
				14.1332
		M1 =	-169.869	kNm
		X[m]	M0(x)	m(x)	M(x)			V0(x)	v(x)	V(x)
		0	0	0	0	kNm		40	0.125	18.7664	kN
		1	35	0.125	13.7664	kNm		30	0.125	8.76642	kN
		2	60	0.25	17.5328	kNm		20	0.125	-1.23358	kN
		3	75	0.375	11.2993	kNm		10	0.125	-11.2336	kN
		4	80	0.5	-4.93433	kNm		0	0.125	-21.2336	kN
		5	75	0.625	-31.1679	kNm		-10	0.125	-31.2336	kN
		6	60	0.75	-67.4015	kNm		-20	0.125	-41.2336	kN
		7	35	0.875	-113.635	kNm		-30	0.125	-51.2336	kN
		8	0	1	-169.869	kNm		-40	0.125	-61.2336	kN

## Sheet: CBT Tapered beam Integrals
			0.2
	0.005		7.18145e-05		0.000144351			0.118945		0.240292
	0.015		0.000548587		0.00111388			0.107912		0.222499
	0.025		0.00130066		0.00266802			0.0981405		0.206612
	0.035		0.00218723		0.00453311			0.0894506		0.192367
	0.045		0.0031171		0.00652795			0.0816935		0.179546
	0.055		0.00403244		0.00853426			0.0747447		0.167966
	0.065		0.00489786		0.0104767			0.0684996		0.15747
	0.075		0.005693		0.0123092			0.0628698		0.147929
	0.085		0.00640752		0.0140055			0.0577801		0.139229
	0.095		0.00703768		0.0155529			0.0531664		0.131275
	0.105		0.007584		0.0169475			0.0489734		0.123983
	0.115		0.00804966		0.0181913			0.0451539		0.117283
	0.125		0.00843943		0.0192901			0.0416667		0.111111
	0.135		0.00875892		0.0202518			0.0384761		0.105414
	0.145		0.00901413		0.0210857			0.0355512		0.100144
	0.155		0.00921107		0.0218013			0.0328647		0.0952599
	0.165		0.00935561		0.0224086			0.0303927		0.0907243
	0.175		0.00945332		0.0229171			0.0281142		0.0865052
	0.185		0.00950942		0.023336			0.0260107		0.0825737
	0.195		0.00952873		0.0236739			0.0240658		0.0789042
	0.205		0.00951567		0.0239388			0.0222648		0.075474
	0.215		0.00947425		0.0241382			0.0205949		0.0722627
	0.225		0.00940811		0.024279			0.0190443		0.0692521
	0.235		0.00932052		0.0243674			0.0176028		0.0664258
	0.245		0.00921443		0.0244091			0.0162611		0.063769
	0.255		0.00909246		0.0244093			0.0150108		0.0612685
	0.265		0.00895695		0.0243727			0.0138444		0.0589122
	0.275		0.00881001		0.0243035			0.0127551		0.0566893
	0.285		0.00865348		0.0242055			0.0117368		0.0545899
	0.295		0.00848901		0.0240823			0.010784		0.052605
	0.305		0.00831807		0.0239369			0.00989165		0.0507264
	0.315		0.00814194		0.0237721			0.00905513		0.0489467
	0.325		0.00796176		0.0235904			0.00827032		0.047259
	0.335		0.00777854		0.0233941			0.00753342		0.0456571
	0.345		0.00759314		0.0231852			0.00684097		0.0441353
	0.355		0.00740636		0.0229655			0.00618981		0.0426883
	0.365		0.00721887		0.0227366			0.00557704		0.0413114
	0.375		0.00703125		0.0225			0.005		0.04
	0.385		0.00684403		0.022257			0.00445626		0.0387501
	0.395		0.00665765		0.0220088			0.00394357		0.0375578
	0.405		0.0064725		0.0217563			0.00345988		0.0364198
	0.415		0.00628891		0.0215006			0.00300328		0.0353327
	0.425		0.00610718		0.0212424			0.00257202		0.0342936
	0.435		0.00592754		0.0209825			0.00216447		0.0332996
	0.445		0.00575021		0.0207215			0.00177915		0.0323482
	0.455		0.00557536		0.02046			0.00141467		0.0314371
	0.465		0.00540313		0.0201986			0.00106973		0.0305638
	0.475		0.00523365		0.0199377			0.000743163		0.0297265
	0.485		0.00506701		0.0196777			0.000433847		0.0289231
	0.495		0.00490328		0.0194189			0.000140759		0.0281519
	0.505		0.00474253		0.0191617			-0.000137055		0.0274111
	0.515		0.0045848		0.0189064			-0.000400487		0.0266991
	0.525		0.00443012		0.0186531			-0.000650364		0.0260146
	0.535		0.0042785		0.0184022			-0.00088746		0.025356
	0.545		0.00412996		0.0181537			-0.0011125		0.0247221
	0.555		0.00398449		0.0179078			-0.00132614		0.0241117
	0.565		0.00384207		0.0176647			-0.00152904		0.0235237
	0.575		0.0037027		0.0174245			-0.00172176		0.0229568
	0.585		0.00356635		0.0171872			-0.00190487		0.0224103
	0.595		0.00343299		0.016953			-0.00207888		0.021883
	0.605		0.00330258		0.0167219			-0.00224428		0.0213741
	0.615		0.00317509		0.016494			-0.00240152		0.0208828
	0.625		0.00305049		0.0162693			-0.00255102		0.0204082
	0.635		0.00292872		0.0160478			-0.00269319		0.0199496
	0.645		0.00280974		0.0158295			-0.00282841		0.0195063
	0.655		0.0026935		0.0156145			-0.00295702		0.0190776
	0.665		0.00257996		0.0154028			-0.00307937		0.0186628
	0.675		0.00246907		0.0151943			-0.00319576		0.0182615
	0.685		0.00236078		0.0149891			-0.0033065		0.017873
	0.695		0.00225503		0.0147871			-0.00341186		0.0174967
	0.705		0.00215177		0.0145883			-0.0035121		0.0171322
	0.715		0.00205096		0.0143927			-0.00360748		0.016779
	0.725		0.00195254		0.0142003			-0.00369822		0.0164366
	0.735		0.00185646		0.014011			-0.00378456		0.0161045
	0.745		0.00176267		0.0138248			-0.0038667		0.0157824
	0.755		0.00167111		0.0136417			-0.00394483		0.0154699
	0.765		0.00158175		0.0134617			-0.00401915		0.0151666
	0.775		0.00149452		0.0132846			-0.00408983		0.0148721
	0.785		0.00140937		0.0131105			-0.00415704		0.0145861
	0.795		0.00132627		0.0129393			-0.00422094		0.0143083
	0.805		0.00124516		0.0127709			-0.00428169		0.0140383
	0.815		0.001166		0.0126054			-0.00433942		0.0137759
	0.825		0.00108873		0.0124427			-0.00439427		0.0135208
	0.835		0.00101332		0.0122827			-0.00444637		0.0132727
	0.845		0.00093972		0.0121254			-0.00449584		0.0130314
	0.855		0.000867883		0.0119708			-0.0045428		0.0127966
	0.865		0.000797768		0.0118188			-0.00458736		0.0125681
	0.875		0.000729333		0.0116693			-0.00462963		0.0123457
	0.885		0.000662538		0.0115224			-0.0046697		0.0121291
	0.895		0.000597343		0.011378			-0.00470767		0.0119182
	0.905		0.000533707		0.0112359			-0.00474363		0.0117127
	0.915		0.000471593		0.0110963			-0.00477767		0.0115125
	0.925		0.000410964		0.010959			-0.00480987		0.0113173
	0.935		0.000351782		0.0108241			-0.0048403		0.0111271
	0.945		0.000294012		0.0106913			-0.00486905		0.0109417
	0.955		0.000237619		0.0105608			-0.00489618		0.0107608
	0.965		0.000182569		0.0104325			-0.00492176		0.0105844
	0.975		0.000128829		0.0103064			-0.00494586		0.0104123
	0.985		7.6367e-05		0.0101823			-0.00496853		0.0102444
	0.995		2.51506e-05		0.0100603			-0.00498984		0.0100805
			0.444211		1.66667			1.23473		4.99917

## Sheet: W-Fi approx
		Tapered beam subjected to a uniformly distributed load
		L0 =	2	m
		L =	8	m
		p =	10	kN/m
			0.02
		W-F FDM approximation
			9-point grid
Number of parts			n =	8
			hk =	1	m
	0.2			0.125
			Nodes	1		2		3		4		5		6		7		8		9
				0		0.125		0.25		0.375		0.5		0.625		0.75		0.875		1
				0.0016		0.0081		0.0256		0.0625		0.1296		0.2401		0.4096		0.6561		1
				0.0032		0.0108		0.0256		0.05		0.0864		0.1372		0.2048		0.2916		0.4
				0.04		0.09		0.16		0.25		0.36		0.49		0.64		0.81		1
				0.04		0.06		0.08		0.1		0.12		0.14		0.16		0.18		0.2
		W0	hkF0	W1	hkF1	W2	hkF2	W3	hkF3	W4	hkF4	W5	hkF5	W6	hkF6	W7	hkF7	W8	hkF8	W9	hkF9	W10	hkF10
	Gov Eq 1 (1)	0.02	0.02	-0.08	-0.04	0.06	-0.02	0	0	0	0	0	0	0	0	0	0	0	0	0	0	0	0		-12.8
	Gov Eq 2 (1)	-0.015625	0	0	-0.03445	0.015625	0.0032	0	0	0	0	0	0	0	0	0	0	0	0	0	0	0	0		0
	Gov Eq 1 (2)	0	0	0.06	0.045	-0.18	-0.06	0.12	-0.045	0	0	0	0	0	0	0	0	0	0	0	0	0	0		-12.8
	Gov Eq 2 (2)	0	0	-0.0351563	0.0027	0	-0.0865125	0.0351563	0.0135	0	0	0	0	0	0	0	0	0	0	0	0	0	0		0
	Gov Eq 1 (3)	0	0	0	0	0.12	0.08	-0.32	-0.08	0.2	-0.08	0	0	0	0	0	0	0	0	0	0	0	0		-12.8
	Gov Eq 2 (3)	0	0	0	0	-0.0625	0.0128	0	-0.1762	0.0625	0.0384	0	0	0	0	0	0	0	0	0	0	0	0		0
	Gov Eq 1 (4)	0	0	0	0	0	0	0.2	0.125	-0.5	-0.1	0.3	-0.125	0	0	0	0	0	0	0	0	0	0		-12.8
	Gov Eq 2 (4)	0	0	0	0	0	0	-0.0976562	0.0375	0	-0.320312	0.0976562	0.0875	0	0	0	0	0	0	0	0	0	0		0
	Gov Eq 1 (5)	0	0	0	0	0	0	0	0	0.3	0.18	-0.72	-0.12	0.42	-0.18	0	0	0	0	0	0	0	0		-12.8
	Gov Eq 2 (5)	0	0	0	0	0	0	0	0	-0.140625	0.0864	0	-0.54045	0.140625	0.1728	0	0	0	0	0	0	0	0		0
	Gov Eq 1 (6)	0	0	0	0	0	0	0	0	0	0	0.42	0.245	-0.98	-0.14	0.56	-0.245	0	0	0	0	0	0		-12.8
	Gov Eq 2 (6)	0	0	0	0	0	0	0	0	0	0	-0.191406	0.1715	0	-0.863012	0.191406	0.3087	0	0	0	0	0	0		0
	Gov Eq 1 (7)	0	0	0	0	0	0	0	0	0	0	0	0	0.56	0.32	-1.28	-0.16	0.72	-0.32	0	0	0	0		-12.8
	Gov Eq 2 (7)	0	0	0	0	0	0	0	0	0	0	0	0	-0.25	0.3072	0	-1.3192	0.25	0.512	0	0	0	0		0
	Gov Eq 1 (8)	0	0	0	0	0	0	0	0	0	0	0	0	0	0	0.72	0.405	-1.62	-0.18	0.9	-0.405	0	0		-12.8
	Gov Eq 2 (8)	0	0	0	0	0	0	0	0	0	0	0	0	0	0	-0.316406	0.5103	0	-1.94501	0.316406	0.8019	0	0		0
	Gov Eq 1 (9)	0	0	0	0	0	0	0	0	0	0	0	0	0	0	0	0	0.9	0.5	-2	-0.2	1.1	-0.5		-12.8
	Gov Eq 2 (9)	0	0	0	0	0	0	0	0	0	0	0	0	0	0	0	0	-0.390625	0.8	0	-2.78125	0.390625	1.2		0
	Bo Co 1 (1)	0	0	1	0	0	0	0	0	0	0	0	0	0	0	0	0	0	0	0	0	0	0		0
	Bo Co 2 (1)	0	-1	0	0	0	1	0	0	0	0	0	0	0	0	0	0	0	0	0	0	0	0		0
	Bo Co 1 (9)	0	0	0	0	0	0	0	0	0	0	0	0	0	0	0	0	0	0	1	0	0	0		0
	Bo Co 2 (9)	0	0	0	0	0	0	0	0	0	0	0	0	0	0	0	0	0	0	0	1	0	0		0
			W0	-2209.18
			hkF0	1122.48
			W1	0
			hkF1	1925.79
			W2	1806.92								FDM		Exact
			hkF2	1122.48							M1 =	0	kNm	0
			W3	2527.53							M2 =	6.88419		13.7664
			hkF3	225.988							M3 =	21.7574	kNm	17.5328
			W4	2409.87							M4 =	23.5496		11.2993
			hkF4	-318.567							M5 =	12.9549	kNm	-4.93433
			W5	1868.58							M6 =	-16.5147		-31.1679
			hkF5	-527.6							M7 =	-64.1536	kNm	-67.4015
			W6	1215.04							M8 =	-127.951		-113.635
			hkF6	-518.488							M9 =	-205.893	kNm	-169.869
			W7	632.593
			hkF7	-390.035
			W8	214.349
			hkF8	-205.238
			W9	-2.48879e-15
			hkF9	0
			W10	0.162572
			hkF10	206.548
		W-F FDM approximation
			17-point grid
		L0 =	2	m
		L =	8	m
		p =	10	kN/m
			0.02
			n =	16
			hk =	0.5	m
				0.0625
	0.2
			Nodes	1		2		3		4		5		6		7		8		9		10		11		12		13		14		15		16		17
				0		0.0625		0.125		0.1875		0.25		0.3125		0.375		0.4375		0.5		0.5625		0.625		0.6875		0.75		0.8125		0.875		0.9375		1
				0.0016		0.00390625		0.0081		0.0150063		0.0256		0.0410063		0.0625		0.0915063		0.1296		0.178506		0.2401		0.316406		0.4096		0.522006		0.6561		0.814506		1
				0.0016		0.003125		0.0054		0.008575		0.0128		0.018225		0.025		0.033275		0.0432		0.054925		0.0686		0.084375		0.1024		0.122825		0.1458		0.171475		0.2
				0.04		0.0625		0.09		0.1225		0.16		0.2025		0.25		0.3025		0.36		0.4225		0.49		0.5625		0.64		0.7225		0.81		0.9025		1
				0.02		0.025		0.03		0.035		0.04		0.045		0.05		0.055		0.06		0.065		0.07		0.075		0.08		0.085		0.09		0.095		0.1
		W0	hkF0	W1	hkF1	W2	hkF2	W3	hkF3	W4	hkF4	W5	hkF5	W6	hkF6	W7	hkF7	W8	hkF8	W9	hkF9	W10	hkF10	W11	hkF11	W12	hkF12	W13	hkF13	W14	hkF14	W15	hkF15	W16	hkF16	W17	hkF17	W18	hkF18
	Gov Eq 1 (1)	0.03	0.02	-0.08	-0.02	0.05	-0.02	0	0	0	0	0	0	0	0	0	0	0	0	0	0	0	0	0	0	0	0	0	0	0	0	0	0	0	0	0	0	0	0		-3.2
	Gov Eq 2 (1)	-0.00390625	0.0008	0	-0.0110125	0.00390625	0.0024	0	0	0	0	0	0	0	0	0	0	0	0	0	0	0	0	0	0	0	0	0	0	0	0	0	0	0	0	0	0	0	0		0
	Gov Eq 1 (2)	0	0	0.05	0.03125	-0.125	-0.025	0.075	-0.03125	0	0	0	0	0	0	0	0	0	0	0	0	0	0	0	0	0	0	0	0	0	0	0	0	0	0	0	0	0	0		-3.2
	Gov Eq 2 (2)	0	0	-0.00610352	0.00234375	0	-0.0200195	0.00610352	0.00546875	0	0	0	0	0	0	0	0	0	0	0	0	0	0	0	0	0	0	0	0	0	0	0	0	0	0	0	0	0	0		0
	Gov Eq 1 (3)	0	0	0	0	0.075	0.045	-0.18	-0.03	0.105	-0.045	0	0	0	0	0	0	0	0	0	0	0	0	0	0	0	0	0	0	0	0	0	0	0	0	0	0	0	0		-3.2
	Gov Eq 2 (3)	0	0	0	0	-0.00878906	0.0054	0	-0.0337781	0.00878906	0.0108	0	0	0	0	0	0	0	0	0	0	0	0	0	0	0	0	0	0	0	0	0	0	0	0	0	0	0	0		0
	Gov Eq 1 (4)	0	0	0	0	0	0	0.105	0.06125	-0.245	-0.035	0.14	-0.06125	0	0	0	0	0	0	0	0	0	0	0	0	0	0	0	0	0	0	0	0	0	0	0	0	0	0		-3.2
	Gov Eq 2 (4)	0	0	0	0	0	0	-0.0119629	0.0107188	0	-0.0539383	0.0119629	0.0192938	0	0	0	0	0	0	0	0	0	0	0	0	0	0	0	0	0	0	0	0	0	0	0	0	0	0		0
	Gov Eq 1 (5)	0	0	0	0	0	0	0	0	0.14	0.08	-0.32	-0.04	0.18	-0.08	0	0	0	0	0	0	0	0	0	0	0	0	0	0	0	0	0	0	0	0	0	0	0	0		-3.2
	Gov Eq 2 (5)	0	0	0	0	0	0	0	0	-0.015625	0.0192	0	-0.08245	0.015625	0.032	0	0	0	0	0	0	0	0	0	0	0	0	0	0	0	0	0	0	0	0	0	0	0	0		0
	Gov Eq 1 (6)	0	0	0	0	0	0	0	0	0	0	0.18	0.10125	-0.405	-0.045	0.225	-0.10125	0	0	0	0	0	0	0	0	0	0	0	0	0	0	0	0	0	0	0	0	0	0		-3.2
	Gov Eq 2 (6)	0	0	0	0	0	0	0	0	0	0	-0.0197754	0.0318938	0	-0.121563	0.0197754	0.0501188	0	0	0	0	0	0	0	0	0	0	0	0	0	0	0	0	0	0	0	0	0	0		0
	Gov Eq 1 (7)	0	0	0	0	0	0	0	0	0	0	0	0	0.225	0.125	-0.5	-0.05	0.275	-0.125	0	0	0	0	0	0	0	0	0	0	0	0	0	0	0	0	0	0	0	0		-3.2
	Gov Eq 2 (7)	0	0	0	0	0	0	0	0	0	0	0	0	-0.0244141	0.05	0	-0.173828	0.0244141	0.075	0	0	0	0	0	0	0	0	0	0	0	0	0	0	0	0	0	0	0	0		0
	Gov Eq 1 (8)	0	0	0	0	0	0	0	0	0	0	0	0	0	0	0.275	0.15125	-0.605	-0.055	0.33	-0.15125	0	0	0	0	0	0	0	0	0	0	0	0	0	0	0	0	0	0		-3.2
	Gov Eq 2 (8)	0	0	0	0	0	0	0	0	0	0	0	0	0	0	-0.029541	0.0748688	0	-0.242095	0.029541	0.108144	0	0	0	0	0	0	0	0	0	0	0	0	0	0	0	0	0	0		0
	Gov Eq 1 (9)	0	0	0	0	0	0	0	0	0	0	0	0	0	0	0	0	0.33	0.18	-0.72	-0.06	0.39	-0.18	0	0	0	0	0	0	0	0	0	0	0	0	0	0	0	0		-3.2
	Gov Eq 2 (9)	0	0	0	0	0	0	0	0	0	0	0	0	0	0	0	0	-0.0351563	0.108	0	-0.329513	0.0351563	0.1512	0	0	0	0	0	0	0	0	0	0	0	0	0	0	0	0		0
	Gov Eq 1 (10)	0	0	0	0	0	0	0	0	0	0	0	0	0	0	0	0	0	0	0.39	0.21125	-0.845	-0.065	0.455	-0.21125	0	0	0	0	0	0	0	0	0	0	0	0	0	0		-3.2
	Gov Eq 2 (10)	0	0	0	0	0	0	0	0	0	0	0	0	0	0	0	0	0	0	-0.0412598	0.151044	0	-0.439532	0.0412598	0.205969	0	0	0	0	0	0	0	0	0	0	0	0	0	0		0
	Gov Eq 1 (11)	0	0	0	0	0	0	0	0	0	0	0	0	0	0	0	0	0	0	0	0	0.455	0.245	-0.98	-0.07	0.525	-0.245	0	0	0	0	0	0	0	0	0	0	0	0		-3.2
	Gov Eq 2 (11)	0	0	0	0	0	0	0	0	0	0	0	0	0	0	0	0	0	0	0	0	-0.0478516	0.2058	0	-0.575903	0.0478516	0.2744	0	0	0	0	0	0	0	0	0	0	0	0		0
	Gov Eq 1 (12)	0	0	0	0	0	0	0	0	0	0	0	0	0	0	0	0	0	0	0	0	0	0	0.525	0.28125	-1.125	-0.075	0.6	-0.28125	0	0	0	0	0	0	0	0	0	0		-3.2
	Gov Eq 2 (12)	0	0	0	0	0	0	0	0	0	0	0	0	0	0	0	0	0	0	0	0	0	0	-0.0549316	0.274219	0	-0.742676	0.0549316	0.358594	0	0	0	0	0	0	0	0	0	0		0
	Gov Eq 1 (13)	0	0	0	0	0	0	0	0	0	0	0	0	0	0	0	0	0	0	0	0	0	0	0	0	0.6	0.32	-1.28	-0.08	0.68	-0.32	0	0	0	0	0	0	0	0		-3.2
	Gov Eq 2 (13)	0	0	0	0	0	0	0	0	0	0	0	0	0	0	0	0	0	0	0	0	0	0	0	0	-0.0625	0.3584	0	-0.9442	0.0625	0.4608	0	0	0	0	0	0	0	0		0
	Gov Eq 1 (14)	0	0	0	0	0	0	0	0	0	0	0	0	0	0	0	0	0	0	0	0	0	0	0	0	0	0	0.68	0.36125	-1.445	-0.085	0.765	-0.36125	0	0	0	0	0	0		-3.2
	Gov Eq 2 (14)	0	0	0	0	0	0	0	0	0	0	0	0	0	0	0	0	0	0	0	0	0	0	0	0	0	0	-0.0705566	0.460594	0	-1.18513	0.0705566	0.583419	0	0	0	0	0	0		0
	Gov Eq 1 (15)	0	0	0	0	0	0	0	0	0	0	0	0	0	0	0	0	0	0	0	0	0	0	0	0	0	0	0	0	0.765	0.405	-1.62	-0.09	0.855	-0.405	0	0	0	0		-3.2
	Gov Eq 2 (15)	0	0	0	0	0	0	0	0	0	0	0	0	0	0	0	0	0	0	0	0	0	0	0	0	0	0	0	0	-0.0791016	0.5832	0	-1.4704	0.0791016	0.729	0	0	0	0		0
	Gov Eq 1 (16)	0	0	0	0	0	0	0	0	0	0	0	0	0	0	0	0	0	0	0	0	0	0	0	0	0	0	0	0	0	0	0.855	0.45125	-1.805	-0.095	0.95	-0.45125	0	0		-3.2
	Gov Eq 2 (16)	0	0	0	0	0	0	0	0	0	0	0	0	0	0	0	0	0	0	0	0	0	0	0	0	0	0	0	0	0	0	-0.0881348	0.728769	0	-1.80528	0.0881348	0.900244	0	0		0
	Gov Eq 1 (17)	0	0	0	0	0	0	0	0	0	0	0	0	0	0	0	0	0	0	0	0	0	0	0	0	0	0	0	0	0	0	0	0	0.95	0.5	-2	-0.1	1.05	-0.5		-3.2
	Gov Eq 2 (17)	0	0	0	0	0	0	0	0	0	0	0	0	0	0	0	0	0	0	0	0	0	0	0	0	0	0	0	0	0	0	0	0	-0.0976562	0.9	0	-2.19531	0.0976562	1.1		0
	Bo Co 1 (1)	0	0	1	0	0	0	0	0	0	0	0	0	0	0	0	0	0	0	0	0	0	0	0	0	0	0	0	0	0	0	0	0	0	0	0	0	0	0		0
	Bo Co 2 (1)	0	-1	0	0	0	1	0	0	0	0	0	0	0	0	0	0	0	0	0	0	0	0	0	0	0	0	0	0	0	0	0	0	0	0	0	0	0	0		0
	Bo Co 1 (17)	0	0	0	0	0	0	0	0	0	0	0	0	0	0	0	0	0	0	0	0	0	0	0	0	0	0	0	0	0	0	0	0	0	0	1	0	0	0		0
	Bo Co 2 (17)	0	0	0	0	0	0	0	0	0	0	0	0	0	0	0	0	0	0	0	0	0	0	0	0	0	0	0	0	0	0	0	0	0	0	0	1	0	0		0
			W0	-1504.69
			hkF0	1005.37
			W1	0
			hkF1	1309.15
			W2	1362.47		X[m]						FDM		Exact
			hkF2	1005.37		0	hkF1	1309.15			M1 =	0	kNm	0
			W3	2264.45		0.5	hkF2	1005.37			M3 =	12.3424	kNm	13.7664
			hkF3	592.037		1	hkF3	592.037			M5 =	20.8983	kNm	17.5328
			W4	2720.88		1.5	hkF4	243.5			M7 =	16.8988	kNm	11.2993
			hkF4	243.5		2	hkF5	-5.03511			M9 =	-0.687804	kNm	-4.93433
			W5	2840		2.5	hkF6	-164.67			M11 =	-30.9435	kNm	-31.1679
			hkF5	-5.03511		3	hkF7	-256.489			M13 =	-72.91	kNm	-67.4015
			W6	2732.34		3.5	hkF8	-299.861			M15 =	-125.905	kNm	-113.635
			hkF6	-164.67		4	hkF9	-309.801			M17 =	-189.483	kNm	-169.869
			W7	2485.9		4.5	hkF10	-297.207
			hkF7	-256.489		5	hkF11	-269.753
			W8	2164.55		5.5	hkF12	-232.768
			hkF8	-299.861		6	hkF13	-189.931
			W9	1812.65		6.5	hkF14	-143.767
			hkF9	-309.801		7	hkF15	-96.0038
			W10	1460.25		7.5	hkF16	-47.8176
			hkF10	-297.207		8	hkF17	-2.89398e-16
			W11	1127.29
			hkF11	-269.753
			W12	826.735
			hkF12	-232.768
			W13	566.737
			hkF13	-189.931
			W14	352.159
			hkF14	-143.767
			W15	185.621
			hkF15	-96.0038
			W16	68.2144
			hkF16	-47.8176
			W17	-7.4739e-16
			hkF17	-2.89398e-16
			W18	-19.6504
			hkF18	46.924
		W-F FDM approximation
			25-point grid
		L0 =	2	m
		L =	8	m
		p =	10	kN/m
			0.02
			n =	24
			hk =	0.333333	m
				0.0416667
	0.2
			Nodes	1		2		3		4		5		6		7		8		9		10		11		12		13		14		15		16		17		18		19		20		21		22		23
				0		0.0416667		0.0833333		0.125		0.166667		0.208333		0.25		0.291667		0.333333		0.375		0.416667		0.458333		0.5		0.541667		0.583333		0.625		0.666667		0.708333		0.75		0.791667		0.833333		0.875		0.916667
				0.0016		0.0029642		0.00505679		0.0081		0.0123457		0.0180753		0.0256		0.0352605		0.0474272		0.0625		0.0809086		0.103112		0.1296		0.16089		0.197531		0.2401		0.289205		0.345483		0.4096		0.482253		0.564168		0.6561		0.758835
				0.00106667		0.00169383		0.0025284		0.0036		0.00493827		0.00657284		0.00853333		0.0108494		0.0135506		0.0166667		0.0202272		0.0242617		0.0288		0.0338716		0.0395062		0.0457333		0.0525827		0.060084		0.0682667		0.0771605		0.0867951		0.0972		0.108405
				0.04		0.0544444		0.0711111		0.09		0.111111		0.134444		0.16		0.187778		0.217778		0.25		0.284444		0.321111		0.36		0.401111		0.444444		0.49		0.537778		0.587778		0.64		0.694444		0.751111		0.81		0.871111
				0.0133333		0.0155556		0.0177778		0.02		0.0222222		0.0244444		0.0266667		0.0288889		0.0311111		0.0333333		0.0355556		0.0377778		0.04		0.0422222		0.0444444		0.0466667		0.0488889		0.0511111		0.0533333		0.0555556		0.0577778		0.06		0.0622222
		W0	hkF0	W1	hkF1	W2	hkF2	W3	hkF3	W4	hkF4	W5	hkF5	W6	hkF6	W7	hkF7	W8	hkF8	W9	hkF9	W10	hkF10	W11	hkF11	W12	hkF12	W13	hkF13	W14	hkF14	W15	hkF15	W16	hkF16	W17	hkF17	W18	hkF18	W19	hkF19	W20	hkF20	W21	hkF21	W22	hkF22	W23	hkF23
	Gov Eq 1 (1)	0.0333333	0.02	-0.08	-0.0133333	0.0466667	-0.02	0	0	0	0	0	0	0	0	0	0	0	0	0	0	0	0	0	0	0	0	0	0	0	0	0	0	0	0	0	0	0	0	0	0	0	0	0	0	0	0	0	0
	Gov Eq 2 (1)	-0.00173611	0.00106667	0	-0.00667222	0.00173611	0.00213333	0	0	0	0	0	0	0	0	0	0	0	0	0	0	0	0	0	0	0	0	0	0	0	0	0	0	0	0	0	0	0	0	0	0	0	0	0	0	0	0	0	0
	Gov Eq 1 (2)	0	0	0.0466667	0.0272222	-0.108889	-0.0155556	0.0622222	-0.0272222	0	0	0	0	0	0	0	0	0	0	0	0	0	0	0	0	0	0	0	0	0	0	0	0	0	0	0	0	0	0	0	0	0	0	0	0	0	0	0	0
	Gov Eq 2 (2)	0	0	-0.00236304	0.00211728	0	-0.0106545	0.00236304	0.00381111	0	0	0	0	0	0	0	0	0	0	0	0	0	0	0	0	0	0	0	0	0	0	0	0	0	0	0	0	0	0	0	0	0	0	0	0	0	0	0	0
	Gov Eq 1 (3)	0	0	0	0	0.0622222	0.0355556	-0.142222	-0.0177778	0.08	-0.0355556	0	0	0	0	0	0	0	0	0	0	0	0	0	0	0	0	0	0	0	0	0	0	0	0	0	0	0	0	0	0	0	0	0	0	0	0	0	0
	Gov Eq 2 (3)	0	0	0	0	-0.00308642	0.00379259	0	-0.0162864	0.00308642	0.00632099	0	0	0	0	0	0	0	0	0	0	0	0	0	0	0	0	0	0	0	0	0	0	0	0	0	0	0	0	0	0	0	0	0	0	0	0	0	0
	Gov Eq 1 (4)	0	0	0	0	0	0	0.08	0.045	-0.18	-0.02	0.1	-0.045	0	0	0	0	0	0	0	0	0	0	0	0	0	0	0	0	0	0	0	0	0	0	0	0	0	0	0	0	0	0	0	0	0	0	0	0
	Gov Eq 2 (4)	0	0	0	0	0	0	-0.00390625	0.0063	0	-0.0240125	0.00390625	0.0099	0	0	0	0	0	0	0	0	0	0	0	0	0	0	0	0	0	0	0	0	0	0	0	0	0	0	0	0	0	0	0	0	0	0	0	0
	Gov Eq 1 (5)	0	0	0	0	0	0	0	0	0.1	0.0555556	-0.222222	-0.0222222	0.122222	-0.0555556	0	0	0	0	0	0	0	0	0	0	0	0	0	0	0	0	0	0	0	0	0	0	0	0	0	0	0	0	0	0	0	0	0	0
	Gov Eq 2 (5)	0	0	0	0	0	0	0	0	-0.00482253	0.00987654	0	-0.0343364	0.00482253	0.0148148	0	0	0	0	0	0	0	0	0	0	0	0	0	0	0	0	0	0	0	0	0	0	0	0	0	0	0	0	0	0	0	0	0	0
	Gov Eq 1 (6)	0	0	0	0	0	0	0	0	0	0	0.122222	0.0672222	-0.268889	-0.0244444	0.146667	-0.0672222	0	0	0	0	0	0	0	0	0	0	0	0	0	0	0	0	0	0	0	0	0	0	0	0	0	0	0	0	0	0	0	0
	Gov Eq 2 (6)	0	0	0	0	0	0	0	0	0	0	-0.00583526	0.0147889	0	-0.0478211	0.00583526	0.0213617	0	0	0	0	0	0	0	0	0	0	0	0	0	0	0	0	0	0	0	0	0	0	0	0	0	0	0	0	0	0	0	0
	Gov Eq 1 (7)	0	0	0	0	0	0	0	0	0	0	0	0	0.146667	0.08	-0.32	-0.0266667	0.173333	-0.08	0	0	0	0	0	0	0	0	0	0	0	0	0	0	0	0	0	0	0	0	0	0	0	0	0	0	0	0	0	0
	Gov Eq 2 (7)	0	0	0	0	0	0	0	0	0	0	0	0	-0.00694444	0.0213333	0	-0.0650889	0.00694444	0.0298667	0	0	0	0	0	0	0	0	0	0	0	0	0	0	0	0	0	0	0	0	0	0	0	0	0	0	0	0	0	0
	Gov Eq 1 (8)	0	0	0	0	0	0	0	0	0	0	0	0	0	0	0.173333	0.0938889	-0.375556	-0.0288889	0.202222	-0.0938889	0	0	0	0	0	0	0	0	0	0	0	0	0	0	0	0	0	0	0	0	0	0	0	0	0	0	0	0
	Gov Eq 2 (8)	0	0	0	0	0	0	0	0	0	0	0	0	0	0	-0.00815008	0.0298358	0	-0.0868211	0.00815008	0.0406852	0	0	0	0	0	0	0	0	0	0	0	0	0	0	0	0	0	0	0	0	0	0	0	0	0	0	0	0
	Gov Eq 1 (9)	0	0	0	0	0	0	0	0	0	0	0	0	0	0	0	0	0.202222	0.108889	-0.435556	-0.0311111	0.233333	-0.108889	0	0	0	0	0	0	0	0	0	0	0	0	0	0	0	0	0	0	0	0	0	0	0	0	0	0
	Gov Eq 2 (9)	0	0	0	0	0	0	0	0	0	0	0	0	0	0	0	0	-0.00945216	0.0406519	0	-0.113759	0.00945216	0.0542025	0	0	0	0	0	0	0	0	0	0	0	0	0	0	0	0	0	0	0	0	0	0	0	0	0	0
	Gov Eq 1 (10)	0	0	0	0	0	0	0	0	0	0	0	0	0	0	0	0	0	0	0.233333	0.125	-0.5	-0.0333333	0.266667	-0.125	0	0	0	0	0	0	0	0	0	0	0	0	0	0	0	0	0	0	0	0	0	0	0	0
	Gov Eq 2 (10)	0	0	0	0	0	0	0	0	0	0	0	0	0	0	0	0	0	0	-0.0108507	0.0541667	0	-0.146701	0.0108507	0.0708333	0	0	0	0	0	0	0	0	0	0	0	0	0	0	0	0	0	0	0	0	0	0	0	0
	Gov Eq 1 (11)	0	0	0	0	0	0	0	0	0	0	0	0	0	0	0	0	0	0	0	0	0.266667	0.142222	-0.568889	-0.0355556	0.302222	-0.142222	0	0	0	0	0	0	0	0	0	0	0	0	0	0	0	0	0	0	0	0	0	0
	Gov Eq 2 (11)	0	0	0	0	0	0	0	0	0	0	0	0	0	0	0	0	0	0	0	0	-0.0123457	0.0707951	0	-0.186509	0.0123457	0.0910222	0	0	0	0	0	0	0	0	0	0	0	0	0	0	0	0	0	0	0	0	0	0
	Gov Eq 1 (12)	0	0	0	0	0	0	0	0	0	0	0	0	0	0	0	0	0	0	0	0	0	0	0.302222	0.160556	-0.642222	-0.0377778	0.34	-0.160556	0	0	0	0	0	0	0	0	0	0	0	0	0	0	0	0	0	0	0	0
	Gov Eq 2 (12)	0	0	0	0	0	0	0	0	0	0	0	0	0	0	0	0	0	0	0	0	0	0	-0.0139371	0.0909815	0	-0.234099	0.0139371	0.115243	0	0	0	0	0	0	0	0	0	0	0	0	0	0	0	0	0	0	0	0
	Gov Eq 1 (13)	0	0	0	0	0	0	0	0	0	0	0	0	0	0	0	0	0	0	0	0	0	0	0	0	0.34	0.18	-0.72	-0.04	0.38	-0.18	0	0	0	0	0	0	0	0	0	0	0	0	0	0	0	0	0	0
	Gov Eq 2 (13)	0	0	0	0	0	0	0	0	0	0	0	0	0	0	0	0	0	0	0	0	0	0	0	0	-0.015625	0.1152	0	-0.29045	0.015625	0.144	0	0	0	0	0	0	0	0	0	0	0	0	0	0	0	0	0	0
	Gov Eq 1 (14)	0	0	0	0	0	0	0	0	0	0	0	0	0	0	0	0	0	0	0	0	0	0	0	0	0	0	0.38	0.200556	-0.802222	-0.0422222	0.422222	-0.200556	0	0	0	0	0	0	0	0	0	0	0	0	0	0	0	0
	Gov Eq 2 (14)	0	0	0	0	0	0	0	0	0	0	0	0	0	0	0	0	0	0	0	0	0	0	0	0	0	0	-0.0174093	0.143954	0	-0.356599	0.0174093	0.177826	0	0	0	0	0	0	0	0	0	0	0	0	0	0	0	0
	Gov Eq 1 (15)	0	0	0	0	0	0	0	0	0	0	0	0	0	0	0	0	0	0	0	0	0	0	0	0	0	0	0	0	0.422222	0.222222	-0.888889	-0.0444444	0.466667	-0.222222	0	0	0	0	0	0	0	0	0	0	0	0	0	0
	Gov Eq 2 (15)	0	0	0	0	0	0	0	0	0	0	0	0	0	0	0	0	0	0	0	0	0	0	0	0	0	0	0	0	-0.0192901	0.177778	0	-0.433642	0.0192901	0.217284	0	0	0	0	0	0	0	0	0	0	0	0	0	0
	Gov Eq 1 (16)	0	0	0	0	0	0	0	0	0	0	0	0	0	0	0	0	0	0	0	0	0	0	0	0	0	0	0	0	0	0	0.466667	0.245	-0.98	-0.0466667	0.513333	-0.245	0	0	0	0	0	0	0	0	0	0	0	0
	Gov Eq 2 (16)	0	0	0	0	0	0	0	0	0	0	0	0	0	0	0	0	0	0	0	0	0	0	0	0	0	0	0	0	0	0	-0.0212674	0.217233	0	-0.522735	0.0212674	0.262967	0	0	0	0	0	0	0	0	0	0	0	0
	Gov Eq 1 (17)	0	0	0	0	0	0	0	0	0	0	0	0	0	0	0	0	0	0	0	0	0	0	0	0	0	0	0	0	0	0	0	0	0.513333	0.268889	-1.07556	-0.0488889	0.562222	-0.268889	0	0	0	0	0	0	0	0	0	0
	Gov Eq 2 (17)	0	0	0	0	0	0	0	0	0	0	0	0	0	0	0	0	0	0	0	0	0	0	0	0	0	0	0	0	0	0	0	0	-0.023341	0.262914	0	-0.625092	0.023341	0.315496	0	0	0	0	0	0	0	0	0	0
	Gov Eq 1 (18)	0	0	0	0	0	0	0	0	0	0	0	0	0	0	0	0	0	0	0	0	0	0	0	0	0	0	0	0	0	0	0	0	0	0	0.562222	0.293889	-1.17556	-0.0511111	0.613333	-0.293889	0	0	0	0	0	0	0	0
	Gov Eq 2 (18)	0	0	0	0	0	0	0	0	0	0	0	0	0	0	0	0	0	0	0	0	0	0	0	0	0	0	0	0	0	0	0	0	0	0	-0.0255112	0.315441	0	-0.741988	0.0255112	0.375525	0	0	0	0	0	0	0	0
	Gov Eq 1 (19)	0	0	0	0	0	0	0	0	0	0	0	0	0	0	0	0	0	0	0	0	0	0	0	0	0	0	0	0	0	0	0	0	0	0	0	0	0.613333	0.32	-1.28	-0.0533333	0.666667	-0.32	0	0	0	0	0	0
	Gov Eq 2 (19)	0	0	0	0	0	0	0	0	0	0	0	0	0	0	0	0	0	0	0	0	0	0	0	0	0	0	0	0	0	0	0	0	0	0	0	0	-0.0277778	0.375467	0	-0.874756	0.0277778	0.443733	0	0	0	0	0	0
	Gov Eq 1 (20)	0	0	0	0	0	0	0	0	0	0	0	0	0	0	0	0	0	0	0	0	0	0	0	0	0	0	0	0	0	0	0	0	0	0	0	0	0	0	0.666667	0.347222	-1.38889	-0.0555556	0.722222	-0.347222	0	0	0	0
	Gov Eq 2 (20)	0	0	0	0	0	0	0	0	0	0	0	0	0	0	0	0	0	0	0	0	0	0	0	0	0	0	0	0	0	0	0	0	0	0	0	0	0	0	-0.0301408	0.443673	0	-1.02479	0.0301408	0.520833	0	0	0	0
	Gov Eq 1 (21)	0	0	0	0	0	0	0	0	0	0	0	0	0	0	0	0	0	0	0	0	0	0	0	0	0	0	0	0	0	0	0	0	0	0	0	0	0	0	0	0	0.722222	0.375556	-1.50222	-0.0577778	0.78	-0.375556	0	0
	Gov Eq 2 (21)	0	0	0	0	0	0	0	0	0	0	0	0	0	0	0	0	0	0	0	0	0	0	0	0	0	0	0	0	0	0	0	0	0	0	0	0	0	0	0	0	-0.0326003	0.52077	0	-1.19354	0.0326003	0.607565	0	0
	Gov Eq 1 (22)	0	0	0	0	0	0	0	0	0	0	0	0	0	0	0	0	0	0	0	0	0	0	0	0	0	0	0	0	0	0	0	0	0	0	0	0	0	0	0	0	0	0	0.78	0.405	-1.62	-0.06	0.84	-0.405
	Gov Eq 2 (22)	0	0	0	0	0	0	0	0	0	0	0	0	0	0	0	0	0	0	0	0	0	0	0	0	0	0	0	0	0	0	0	0	0	0	0	0	0	0	0	0	0	0	-0.0351563	0.6075	0	-1.38251	0.0351563	0.7047
	Gov Eq 1 (23)	0	0	0	0	0	0	0	0	0	0	0	0	0	0	0	0	0	0	0	0	0	0	0	0	0	0	0	0	0	0	0	0	0	0	0	0	0	0	0	0	0	0	0	0	0.84	0.435556	-1.74222	-0.0622222
	Gov Eq 2 (23)	0	0	0	0	0	0	0	0	0	0	0	0	0	0	0	0	0	0	0	0	0	0	0	0	0	0	0	0	0	0	0	0	0	0	0	0	0	0	0	0	0	0	0	0	-0.0378086	0.704632	0	-1.59329
	Gov Eq 1 (24)	0	0	0	0	0	0	0	0	0	0	0	0	0	0	0	0	0	0	0	0	0	0	0	0	0	0	0	0	0	0	0	0	0	0	0	0	0	0	0	0	0	0	0	0	0	0	0.902222	0.467222
	Gov Eq 2 (24)	0	0	0	0	0	0	0	0	0	0	0	0	0	0	0	0	0	0	0	0	0	0	0	0	0	0	0	0	0	0	0	0	0	0	0	0	0	0	0	0	0	0	0	0	0	0	-0.0405575	0.812967
	Gov Eq 1 (25)	0	0	0	0	0	0	0	0	0	0	0	0	0	0	0	0	0	0	0	0	0	0	0	0	0	0	0	0	0	0	0	0	0	0	0	0	0	0	0	0	0	0	0	0	0	0	0	0
	Gov Eq 2 (25)	0	0	0	0	0	0	0	0	0	0	0	0	0	0	0	0	0	0	0	0	0	0	0	0	0	0	0	0	0	0	0	0	0	0	0	0	0	0	0	0	0	0	0	0	0	0	0	0
	Bo Co 1 (1)	0	0	1	0	0	0	0	0	0	0	0	0	0	0	0	0	0	0	0	0	0	0	0	0	0	0	0	0	0	0	0	0	0	0	0	0	0	0	0	0	0	0	0	0	0	0	0	0
	Bo Co 2 (1)	0	-1	0	0	0	1	0	0	0	0	0	0	0	0	0	0	0	0	0	0	0	0	0	0	0	0	0	0	0	0	0	0	0	0	0	0	0	0	0	0	0	0	0	0	0	0	0	0
	Bo Co 1 (25)	0	0	0	0	0	0	0	0	0	0	0	0	0	0	0	0	0	0	0	0	0	0	0	0	0	0	0	0	0	0	0	0	0	0	0	0	0	0	0	0	0	0	0	0	0	0	0	0
	Bo Co 2 (25)	0	0	0	0	0	0	0	0	0	0	0	0	0	0	0	0	0	0	0	0	0	0	0	0	0	0	0	0	0	0	0	0	0	0	0	0	0	0	0	0	0	0	0	0	0	0	0	0
			W0	-1081.53
			hkF0	783.006
			W1	0
			hkF1	918.29
			W2	1004.41		X[m]	hkF0	783.006				FDM		Exact
			hkF2	783.006		0	hkF1	918.29			M1 =	0	kNm	0
			W3	1780.39		0.333333	hkF2	783.006			M4 =	13.5235	kNm	13.7664
			hkF3	574.926		0.666667	hkF3	574.926			M7 =	19.5435	kNm	17.5328
			W4	2311.77		1	hkF4	373.171			M10 =	13.8394	kNm	11.2993
			hkF4	373.171		1.33333	hkF5	203.909			M13 =	-3.50369	kNm	-4.93433
			W5	2630.32		1.66667	hkF6	71.6211			M16 =	-31.9332	kNm	-31.1679
			hkF5	203.909		2	hkF7	-27.1408			M19 =	-71.026	kNm	-67.4015
			W6	2779.33		2.33333	hkF8	-98.0272			M22 =	-120.509	kNm	-113.635
			hkF6	71.6211		2.66667	hkF9	-146.675			M25 =	-180.211	kNm	-169.869
			W7	2799.84		3	hkF10	-177.966
			hkF7	-27.1408		3.33333	hkF11	-195.882
			W8	2726.52		3.66667	hkF12	-203.573
			hkF8	-98.0272		4	hkF13	-203.5
			W9	2587.13		4.33333	hkF14	-197.566
			hkF9	-146.675		4.66667	hkF15	-187.239
			W10	2403.38		5	hkF16	-173.654
			hkF10	-177.966		5.33333	hkF17	-157.684
			W11	2191.95		5.66667	hkF18	-140.002
			hkF11	-195.882		6	hkF19	-121.13
			W12	1965.59		6.33333	hkF20	-101.468
			hkF12	-203.573		6.66667	hkF21	-81.3279
			W13	1733.98		7	hkF22	-60.9476
			hkF13	-203.5		7.33333	hkF23	-40.5113
			W14	1504.44		7.66667	hkF24	-20.1597
			hkF14	-197.566		8	hkF25	-1.12062e-15
			W15	1282.45			hkF26	19.8872
			hkF15	-187.239
			W16	1072.1
			hkF16	-173.654
			W17	876.431
			hkF17	-157.684
			W18	697.626
			hkF18	-140.002
			W19	537.252
			hkF19	-121.13
			W20	396.38
			hkF20	-101.468
			W21	275.706
			hkF21	-81.3279
			W22	175.633
			hkF22	-60.9476
			W23	96.341
			hkF23	-40.5113
			W24	37.8378
			hkF24	-20.1597
			W25	-4.08544e-16
			hkF25	-1.12062e-15
			W26	-17.3954
			hkF26	19.8872
[truncated: 7 more columns]

## Sheet: M-W approx
		Tapered beam subjected to a uniformly distributed load
		L0 =	2	m
		L =	8	m
		p =	10	kN/m
			0.02
		M-W FDM approximation
			9-point grid
Number of parts			n =	8
			hk =	1	m
	0.2			0.125
			Nodes	1		2		3		4		5		6		7		8		9
				0		0.125		0.25		0.375		0.5		0.625		0.75		0.875		1
				0.0016		0.0081		0.0256		0.0625		0.1296		0.2401		0.4096		0.6561		1
				0.04		0.09		0.16		0.25		0.36		0.49		0.64		0.81		1
				0.04		0.06		0.08		0.1		0.12		0.14		0.16		0.18		0.2
		W0	hk2M0	W1	hk2M1	W2	hk2M2	W3	hk2M3	W4	hk2M4	W5	hk2M5	W6	hk2M6	W7	hk2M7	W8	hk2M8	W9	hk2M9	W10	hk2M10
	Gov Eq 1 (1)	0	1	0	-2	0	1	0	0	0	0	0	0	0	0	0	0	0	0	0	0	0	0		-10
	Gov Eq 2 (1)	0.0016	-0.0768	-0.0032	1.1024	0.0016	-0.0256	0	0	0	0	0	0	0	0	0	0	0	0	0	0	0	0		0
	Gov Eq 1 (2)	0	0	0	1	0	-2	0	1	0	0	0	0	0	0	0	0	0	0	0	0	0	0		-10
	Gov Eq 2 (2)	0	0	0.0081	-0.1536	-0.0162	1.2304	0.0081	-0.0768	0	0	0	0	0	0	0	0	0	0	0	0	0	0		0
	Gov Eq 1 (3)	0	0	0	0	0	1	0	-2	0	1	0	0	0	0	0	0	0	0	0	0	0	0		-10
	Gov Eq 2 (3)	0	0	0	0	0.0256	-0.256	-0.0512	1.4096	0.0256	-0.1536	0	0	0	0	0	0	0	0	0	0	0	0		0
	Gov Eq 1 (4)	0	0	0	0	0	0	0	1	0	-2	0	1	0	0	0	0	0	0	0	0	0	0		-10
	Gov Eq 2 (4)	0	0	0	0	0	0	0.0625	-0.384	-0.125	1.64	0.0625	-0.256	0	0	0	0	0	0	0	0	0	0		0
	Gov Eq 1 (5)	0	0	0	0	0	0	0	0	0	1	0	-2	0	1	0	0	0	0	0	0	0	0		-10
	Gov Eq 2 (5)	0	0	0	0	0	0	0	0	0.1296	-0.5376	-0.2592	1.9216	0.1296	-0.384	0	0	0	0	0	0	0	0		0
	Gov Eq 1 (6)	0	0	0	0	0	0	0	0	0	0	0	1	0	-2	0	1	0	0	0	0	0	0		-10
	Gov Eq 2 (6)	0	0	0	0	0	0	0	0	0	0	0.2401	-0.7168	-0.4802	2.2544	0.2401	-0.5376	0	0	0	0	0	0		0
	Gov Eq 1 (7)	0	0	0	0	0	0	0	0	0	0	0	0	0	1	0	-2	0	1	0	0	0	0		-10
	Gov Eq 2 (7)	0	0	0	0	0	0	0	0	0	0	0	0	0.4096	-0.9216	-0.8192	2.6384	0.4096	-0.7168	0	0	0	0		0
	Gov Eq 1 (8)	0	0	0	0	0	0	0	0	0	0	0	0	0	0	0	1	0	-2	0	1	0	0		-10
	Gov Eq 2 (8)	0	0	0	0	0	0	0	0	0	0	0	0	0	0	0.6561	-1.152	-1.3122	3.0736	0.6561	-0.9216	0	0		0
	Gov Eq 1 (9)	0	0	0	0	0	0	0	0	0	0	0	0	0	0	0	0	0	1	0	-2	0	1		-10
	Gov Eq 2 (9)	0	0	0	0	0	0	0	0	0	0	0	0	0	0	0	0	1	-1.408	-2	3.56	1	-1.152		0
	Bo Co 1 (1)	0	0	1	0	0	0	0	0	0	0	0	0	0	0	0	0	0	0	0	0	0	0		0
	Bo Co 2 (1)	0	0	0	1	0	0	0	0	0	0	0	0	0	0	0	0	0	0	0	0	0	0		0
	Bo Co 1 (9)	0	0	0	0	0	0	0	0	0	0	0	0	0	0	0	0	0	0	1	0	0	0		0
	Bo Co 2 (9)	0	0	0	0	0	0	0	0	0	0	0	0	0	0	0	0	-1	1.28	0	0	1	-1.28		0
			W0	-3244.41
			hk2M0	-24.002
			W1	0
			hk2M1	0
			W2	2316.35								FDM		Exact
			hk2M2	14.002				hk2M1	0		M1 =	0	kNm	0
			W3	2676.48				hk2M2	14.002		M2 =	14.002		13.7664
			hk2M3	18.004				hk2M3	18.004		M3 =	18.004	kNm	17.5328
			W4	2257.33				hk2M4	12.006		M4 =	12.006		11.2993
			hk2M4	12.006				hk2M5	-3.99206		M5 =	-3.99206	kNm	-4.93433
			W5	1617.41				hk2M6	-29.9901		M6 =	-29.9901		-31.1679
			hk2M5	-3.99206				hk2M7	-65.9881		M7 =	-65.9881	kNm	-67.4015
			W6	997.616				hk2M8	-111.986		M8 =	-111.986		-113.635
			hk2M6	-29.9901				hk2M9	-167.984		M9 =	-167.984	kNm	-169.869
			W7	499.745
			hk2M7	-65.9881
			W8	163.477
			hk2M8	-111.986
			W9	4.44089e-15
			hk2M9	-167.984
			W10	7.32235
			hk2M10	-233.982
		M-W FDM approximation
			17-point grid
		L0 =	2	m
		L =	8	m
		p =	10	kN/m
			0.02
			n =	16
			hk =	0.5	m
				0.0625
	0.2
			Nodes	1		2		3		4		5		6		7		8		9		10		11		12		13		14		15		16		17
				0		0.0625		0.125		0.1875		0.25		0.3125		0.375		0.4375		0.5		0.5625		0.625		0.6875		0.75		0.8125		0.875		0.9375		1
				0.0016		0.00390625		0.0081		0.0150063		0.0256		0.0410063		0.0625		0.0915063		0.1296		0.178506		0.2401		0.316406		0.4096		0.522006		0.6561		0.814506		1
				0.04		0.0625		0.09		0.1225		0.16		0.2025		0.25		0.3025		0.36		0.4225		0.49		0.5625		0.64		0.7225		0.81		0.9025		1
				0.02		0.025		0.03		0.035		0.04		0.045		0.05		0.055		0.06		0.065		0.07		0.075		0.08		0.085		0.09		0.095		0.1
		W0	hk2M0	W1	hk2M1	W2	hk2M2	W3	hk2M3	W4	hk2M4	W5	hk2M5	W6	hk2M6	W7	hk2M7	W8	hk2M8	W9	hk2M9	W10	hk2M10	W11	hk2M11	W12	hk2M12	W13	hk2M13	W14	hk2M14	W15	hk2M15	W16	hk2M16	W17	hk2M17	W18	hk2M18
	Gov Eq 1 (1)	0	1	0	-2	0	1	0	0	0	0	0	0	0	0	0	0	0	0	0	0	0	0	0	0	0	0	0	0	0	0	0	0	0	0	0	0	0	0		-0.625
	Gov Eq 2 (1)	0.0016	-0.256	-0.0032	1.4096	0.0016	-0.1536	0	0	0	0	0	0	0	0	0	0	0	0	0	0	0	0	0	0	0	0	0	0	0	0	0	0	0	0	0	0	0	0		0
	Gov Eq 1 (2)	0	0	0	1	0	-2	0	1	0	0	0	0	0	0	0	0	0	0	0	0	0	0	0	0	0	0	0	0	0	0	0	0	0	0	0	0	0	0		-0.625
	Gov Eq 2 (2)	0	0	0.00390625	-0.384	-0.0078125	1.64	0.00390625	-0.256	0	0	0	0	0	0	0	0	0	0	0	0	0	0	0	0	0	0	0	0	0	0	0	0	0	0	0	0	0	0		0
	Gov Eq 1 (3)	0	0	0	0	0	1	0	-2	0	1	0	0	0	0	0	0	0	0	0	0	0	0	0	0	0	0	0	0	0	0	0	0	0	0	0	0	0	0		-0.625
	Gov Eq 2 (3)	0	0	0	0	0.0081	-0.5376	-0.0162	1.9216	0.0081	-0.384	0	0	0	0	0	0	0	0	0	0	0	0	0	0	0	0	0	0	0	0	0	0	0	0	0	0	0	0		0
	Gov Eq 1 (4)	0	0	0	0	0	0	0	1	0	-2	0	1	0	0	0	0	0	0	0	0	0	0	0	0	0	0	0	0	0	0	0	0	0	0	0	0	0	0		-0.625
	Gov Eq 2 (4)	0	0	0	0	0	0	0.0150063	-0.7168	-0.0300125	2.2544	0.0150063	-0.5376	0	0	0	0	0	0	0	0	0	0	0	0	0	0	0	0	0	0	0	0	0	0	0	0	0	0		0
	Gov Eq 1 (5)	0	0	0	0	0	0	0	0	0	1	0	-2	0	1	0	0	0	0	0	0	0	0	0	0	0	0	0	0	0	0	0	0	0	0	0	0	0	0		-0.625
	Gov Eq 2 (5)	0	0	0	0	0	0	0	0	0.0256	-0.9216	-0.0512	2.6384	0.0256	-0.7168	0	0	0	0	0	0	0	0	0	0	0	0	0	0	0	0	0	0	0	0	0	0	0	0		0
	Gov Eq 1 (6)	0	0	0	0	0	0	0	0	0	0	0	1	0	-2	0	1	0	0	0	0	0	0	0	0	0	0	0	0	0	0	0	0	0	0	0	0	0	0		-0.625
	Gov Eq 2 (6)	0	0	0	0	0	0	0	0	0	0	0.0410063	-1.152	-0.0820125	3.0736	0.0410063	-0.9216	0	0	0	0	0	0	0	0	0	0	0	0	0	0	0	0	0	0	0	0	0	0		0
	Gov Eq 1 (7)	0	0	0	0	0	0	0	0	0	0	0	0	0	1	0	-2	0	1	0	0	0	0	0	0	0	0	0	0	0	0	0	0	0	0	0	0	0	0		-0.625
	Gov Eq 2 (7)	0	0	0	0	0	0	0	0	0	0	0	0	0.0625	-1.408	-0.125	3.56	0.0625	-1.152	0	0	0	0	0	0	0	0	0	0	0	0	0	0	0	0	0	0	0	0		0
	Gov Eq 1 (8)	0	0	0	0	0	0	0	0	0	0	0	0	0	0	0	1	0	-2	0	1	0	0	0	0	0	0	0	0	0	0	0	0	0	0	0	0	0	0		-0.625
	Gov Eq 2 (8)	0	0	0	0	0	0	0	0	0	0	0	0	0	0	0.0915063	-1.6896	-0.183013	4.0976	0.0915063	-1.408	0	0	0	0	0	0	0	0	0	0	0	0	0	0	0	0	0	0		0
	Gov Eq 1 (9)	0	0	0	0	0	0	0	0	0	0	0	0	0	0	0	0	0	1	0	-2	0	1	0	0	0	0	0	0	0	0	0	0	0	0	0	0	0	0		-0.625
	Gov Eq 2 (9)	0	0	0	0	0	0	0	0	0	0	0	0	0	0	0	0	0.1296	-1.9968	-0.2592	4.6864	0.1296	-1.6896	0	0	0	0	0	0	0	0	0	0	0	0	0	0	0	0		0
	Gov Eq 1 (10)	0	0	0	0	0	0	0	0	0	0	0	0	0	0	0	0	0	0	0	1	0	-2	0	1	0	0	0	0	0	0	0	0	0	0	0	0	0	0		-0.625
	Gov Eq 2 (10)	0	0	0	0	0	0	0	0	0	0	0	0	0	0	0	0	0	0	0.178506	-2.3296	-0.357013	5.3264	0.178506	-1.9968	0	0	0	0	0	0	0	0	0	0	0	0	0	0		0
	Gov Eq 1 (11)	0	0	0	0	0	0	0	0	0	0	0	0	0	0	0	0	0	0	0	0	0	1	0	-2	0	1	0	0	0	0	0	0	0	0	0	0	0	0		-0.625
	Gov Eq 2 (11)	0	0	0	0	0	0	0	0	0	0	0	0	0	0	0	0	0	0	0	0	0.2401	-2.688	-0.4802	6.0176	0.2401	-2.3296	0	0	0	0	0	0	0	0	0	0	0	0		0
	Gov Eq 1 (12)	0	0	0	0	0	0	0	0	0	0	0	0	0	0	0	0	0	0	0	0	0	0	0	1	0	-2	0	1	0	0	0	0	0	0	0	0	0	0		-0.625
	Gov Eq 2 (12)	0	0	0	0	0	0	0	0	0	0	0	0	0	0	0	0	0	0	0	0	0	0	0.316406	-3.072	-0.632812	6.76	0.316406	-2.688	0	0	0	0	0	0	0	0	0	0		0
	Gov Eq 1 (13)	0	0	0	0	0	0	0	0	0	0	0	0	0	0	0	0	0	0	0	0	0	0	0	0	0	1	0	-2	0	1	0	0	0	0	0	0	0	0		-0.625
	Gov Eq 2 (13)	0	0	0	0	0	0	0	0	0	0	0	0	0	0	0	0	0	0	0	0	0	0	0	0	0.4096	-3.4816	-0.8192	7.5536	0.4096	-3.072	0	0	0	0	0	0	0	0		0
	Gov Eq 1 (14)	0	0	0	0	0	0	0	0	0	0	0	0	0	0	0	0	0	0	0	0	0	0	0	0	0	0	0	1	0	-2	0	1	0	0	0	0	0	0		-0.625
	Gov Eq 2 (14)	0	0	0	0	0	0	0	0	0	0	0	0	0	0	0	0	0	0	0	0	0	0	0	0	0	0	0.522006	-3.9168	-1.04401	8.3984	0.522006	-3.4816	0	0	0	0	0	0		0
	Gov Eq 1 (15)	0	0	0	0	0	0	0	0	0	0	0	0	0	0	0	0	0	0	0	0	0	0	0	0	0	0	0	0	0	1	0	-2	0	1	0	0	0	0		-0.625
	Gov Eq 2 (15)	0	0	0	0	0	0	0	0	0	0	0	0	0	0	0	0	0	0	0	0	0	0	0	0	0	0	0	0	0.6561	-4.3776	-1.3122	9.2944	0.6561	-3.9168	0	0	0	0		0
	Gov Eq 1 (16)	0	0	0	0	0	0	0	0	0	0	0	0	0	0	0	0	0	0	0	0	0	0	0	0	0	0	0	0	0	0	0	1	0	-2	0	1	0	0		-0.625
	Gov Eq 2 (16)	0	0	0	0	0	0	0	0	0	0	0	0	0	0	0	0	0	0	0	0	0	0	0	0	0	0	0	0	0	0	0.814506	-4.864	-1.62901	10.2416	0.814506	-4.3776	0	0		0
	Gov Eq 1 (17)	0	0	0	0	0	0	0	0	0	0	0	0	0	0	0	0	0	0	0	0	0	0	0	0	0	0	0	0	0	0	0	0	0	1	0	-2	0	1		-0.625
	Gov Eq 2 (17)	0	0	0	0	0	0	0	0	0	0	0	0	0	0	0	0	0	0	0	0	0	0	0	0	0	0	0	0	0	0	0	0	1	-5.376	-2	11.24	1	-4.864		0
	Bo Co 1 (1)	0	0	1	0	0	0	0	0	0	0	0	0	0	0	0	0	0	0	0	0	0	0	0	0	0	0	0	0	0	0	0	0	0	0	0	0	0	0		0
	Bo Co 2 (1)	0	0	0	1	0	0	0	0	0	0	0	0	0	0	0	0	0	0	0	0	0	0	0	0	0	0	0	0	0	0	0	0	0	0	0	0	0	0		0
	Bo Co 1 (17)	0	0	0	0	0	0	0	0	0	0	0	0	0	0	0	0	0	0	0	0	0	0	0	0	0	0	0	0	0	0	0	0	0	0	1	0	0	0		0
	Bo Co 2 (17)	0	0	0	0	0	0	0	0	0	0	0	0	0	0	0	0	0	0	0	0	0	0	0	0	0	0	0	0	0	0	0	0	-1	5.12	0	0	1	-5.12		0
			W0	-1694.29
			hk2M0	-2.66282
			W1	0
			hk2M1	6.93889e-17
			W2	1463.87		X[m]						FDM		Exact
			hk2M2	2.03782		0	hk2M1	6.93889e-17			M1 =	2.77556e-16	kNm	0
			W3	2298.31		1	hk2M3	3.45064			M3 =	13.8026	kNm	13.7664
			hk2M3	3.45064		2	hk2M5	4.40128			M5 =	17.6051	kNm	17.5328
			W4	2650.34		3	hk2M7	2.85192			M7 =	11.4077	kNm	11.2993
			hk2M4	4.23846		4	hk2M9	-1.19745			M9 =	-4.78978	kNm	-4.93433
			W5	2688.11		5	hk2M11	-7.74681			M11 =	-30.9872	kNm	-31.1679
			hk2M5	4.40128		6	hk2M13	-16.7962			M13 =	-67.1847	kNm	-67.4015
			W6	2535.17		7	hk2M15	-28.3455			M15 =	-113.382	kNm	-113.635
			hk2M6	3.9391		8	hk2M17	-42.3949			M17 =	-169.58	kNm	-169.869		0.5
			W7	2274.71
			hk2M7	2.85192
			W8	1961.55
			hk2M8	1.13973
			W9	1631.59
			hk2M9	-1.19745
			W10	1308.26
			hk2M10	-4.15963
			W11	1006.76
			hk2M11	-7.74681
			W12	736.822
			hk2M12	-11.959
			W13	504.481
			hk2M13	-16.7962
			W14	313.295
			hk2M14	-22.2584
			W15	165.135
			hk2M15	-28.3455
			W16	60.7221
			hk2M16	-35.0577
			W17	1.6651e-15
			hk2M17	-42.3949
			W18	-17.6106
			hk2M18	-50.3571
		M-W FDM approximation
			25-point grid
		L0 =	2	m
		L =	8	m
		p =	10	kN/m
			0.02
			n =	24
			hk =	0.333333	m
				0.0416667
	0.2
			Nodes	1		2		3		4		5		6		7		8		9		10		11		12		13		14		15		16		17		18		19		20		21		22		23
				0		0.0416667		0.0833333		0.125		0.166667		0.208333		0.25		0.291667		0.333333		0.375		0.416667		0.458333		0.5		0.541667		0.583333		0.625		0.666667		0.708333		0.75		0.791667		0.833333		0.875		0.916667
				0.0016		0.0029642		0.00505679		0.0081		0.0123457		0.0180753		0.0256		0.0352605		0.0474272		0.0625		0.0809086		0.103112		0.1296		0.16089		0.197531		0.2401		0.289205		0.345483		0.4096		0.482253		0.564168		0.6561		0.758835
				0.04		0.0544444		0.0711111		0.09		0.111111		0.134444		0.16		0.187778		0.217778		0.25		0.284444		0.321111		0.36		0.401111		0.444444		0.49		0.537778		0.587778		0.64		0.694444		0.751111		0.81		0.871111
				0.0133333		0.0155556		0.0177778		0.02		0.0222222		0.0244444		0.0266667		0.0288889		0.0311111		0.0333333		0.0355556		0.0377778		0.04		0.0422222		0.0444444		0.0466667		0.0488889		0.0511111		0.0533333		0.0555556		0.0577778		0.06		0.0622222
		W0	hk2M0	W1	hk2M1	W2	hk2M2	W3	hk2M3	W4	hk2M4	W5	hk2M5	W6	hk2M6	W7	hk2M7	W8	hk2M8	W9	hk2M9	W10	hk2M10	W11	hk2M11	W12	hk2M12	W13	hk2M13	W14	hk2M14	W15	hk2M15	W16	hk2M16	W17	hk2M17	W18	hk2M18	W19	hk2M19	W20	hk2M20	W21	hk2M21	W22	hk2M22	W23	hk2M23
	Gov Eq 1 (1)	0	1	0	-2	0	1	0	0	0	0	0	0	0	0	0	0	0	0	0	0	0	0	0	0	0	0	0	0	0	0	0	0	0	0	0	0	0	0	0	0	0	0	0	0	0	0	0	0
	Gov Eq 2 (1)	0.0016	-0.5376	-0.0032	1.9216	0.0016	-0.384	0	0	0	0	0	0	0	0	0	0	0	0	0	0	0	0	0	0	0	0	0	0	0	0	0	0	0	0	0	0	0	0	0	0	0	0	0	0	0	0	0	0
	Gov Eq 1 (2)	0	0	0	1	0	-2	0	1	0	0	0	0	0	0	0	0	0	0	0	0	0	0	0	0	0	0	0	0	0	0	0	0	0	0	0	0	0	0	0	0	0	0	0	0	0	0	0	0
	Gov Eq 2 (2)	0	0	0.0029642	-0.7168	-0.0059284	2.2544	0.0029642	-0.5376	0	0	0	0	0	0	0	0	0	0	0	0	0	0	0	0	0	0	0	0	0	0	0	0	0	0	0	0	0	0	0	0	0	0	0	0	0	0	0	0
	Gov Eq 1 (3)	0	0	0	0	0	1	0	-2	0	1	0	0	0	0	0	0	0	0	0	0	0	0	0	0	0	0	0	0	0	0	0	0	0	0	0	0	0	0	0	0	0	0	0	0	0	0	0	0
	Gov Eq 2 (3)	0	0	0	0	0.00505679	-0.9216	-0.0101136	2.6384	0.00505679	-0.7168	0	0	0	0	0	0	0	0	0	0	0	0	0	0	0	0	0	0	0	0	0	0	0	0	0	0	0	0	0	0	0	0	0	0	0	0	0	0
	Gov Eq 1 (4)	0	0	0	0	0	0	0	1	0	-2	0	1	0	0	0	0	0	0	0	0	0	0	0	0	0	0	0	0	0	0	0	0	0	0	0	0	0	0	0	0	0	0	0	0	0	0	0	0
	Gov Eq 2 (4)	0	0	0	0	0	0	0.0081	-1.152	-0.0162	3.0736	0.0081	-0.9216	0	0	0	0	0	0	0	0	0	0	0	0	0	0	0	0	0	0	0	0	0	0	0	0	0	0	0	0	0	0	0	0	0	0	0	0
	Gov Eq 1 (5)	0	0	0	0	0	0	0	0	0	1	0	-2	0	1	0	0	0	0	0	0	0	0	0	0	0	0	0	0	0	0	0	0	0	0	0	0	0	0	0	0	0	0	0	0	0	0	0	0
	Gov Eq 2 (5)	0	0	0	0	0	0	0	0	0.0123457	-1.408	-0.0246914	3.56	0.0123457	-1.152	0	0	0	0	0	0	0	0	0	0	0	0	0	0	0	0	0	0	0	0	0	0	0	0	0	0	0	0	0	0	0	0	0	0
	Gov Eq 1 (6)	0	0	0	0	0	0	0	0	0	0	0	1	0	-2	0	1	0	0	0	0	0	0	0	0	0	0	0	0	0	0	0	0	0	0	0	0	0	0	0	0	0	0	0	0	0	0	0	0
	Gov Eq 2 (6)	0	0	0	0	0	0	0	0	0	0	0.0180753	-1.6896	-0.0361506	4.0976	0.0180753	-1.408	0	0	0	0	0	0	0	0	0	0	0	0	0	0	0	0	0	0	0	0	0	0	0	0	0	0	0	0	0	0	0	0
	Gov Eq 1 (7)	0	0	0	0	0	0	0	0	0	0	0	0	0	1	0	-2	0	1	0	0	0	0	0	0	0	0	0	0	0	0	0	0	0	0	0	0	0	0	0	0	0	0	0	0	0	0	0	0
	Gov Eq 2 (7)	0	0	0	0	0	0	0	0	0	0	0	0	0.0256	-1.9968	-0.0512	4.6864	0.0256	-1.6896	0	0	0	0	0	0	0	0	0	0	0	0	0	0	0	0	0	0	0	0	0	0	0	0	0	0	0	0	0	0
	Gov Eq 1 (8)	0	0	0	0	0	0	0	0	0	0	0	0	0	0	0	1	0	-2	0	1	0	0	0	0	0	0	0	0	0	0	0	0	0	0	0	0	0	0	0	0	0	0	0	0	0	0	0	0
	Gov Eq 2 (8)	0	0	0	0	0	0	0	0	0	0	0	0	0	0	0.0352605	-2.3296	-0.070521	5.3264	0.0352605	-1.9968	0	0	0	0	0	0	0	0	0	0	0	0	0	0	0	0	0	0	0	0	0	0	0	0	0	0	0	0
	Gov Eq 1 (9)	0	0	0	0	0	0	0	0	0	0	0	0	0	0	0	0	0	1	0	-2	0	1	0	0	0	0	0	0	0	0	0	0	0	0	0	0	0	0	0	0	0	0	0	0	0	0	0	0
	Gov Eq 2 (9)	0	0	0	0	0	0	0	0	0	0	0	0	0	0	0	0	0.0474272	-2.688	-0.0948543	6.0176	0.0474272	-2.3296	0	0	0	0	0	0	0	0	0	0	0	0	0	0	0	0	0	0	0	0	0	0	0	0	0	0
	Gov Eq 1 (10)	0	0	0	0	0	0	0	0	0	0	0	0	0	0	0	0	0	0	0	1	0	-2	0	1	0	0	0	0	0	0	0	0	0	0	0	0	0	0	0	0	0	0	0	0	0	0	0	0
	Gov Eq 2 (10)	0	0	0	0	0	0	0	0	0	0	0	0	0	0	0	0	0	0	0.0625	-3.072	-0.125	6.76	0.0625	-2.688	0	0	0	0	0	0	0	0	0	0	0	0	0	0	0	0	0	0	0	0	0	0	0	0
	Gov Eq 1 (11)	0	0	0	0	0	0	0	0	0	0	0	0	0	0	0	0	0	0	0	0	0	1	0	-2	0	1	0	0	0	0	0	0	0	0	0	0	0	0	0	0	0	0	0	0	0	0	0	0
	Gov Eq 2 (11)	0	0	0	0	0	0	0	0	0	0	0	0	0	0	0	0	0	0	0	0	0.0809086	-3.4816	-0.161817	7.5536	0.0809086	-3.072	0	0	0	0	0	0	0	0	0	0	0	0	0	0	0	0	0	0	0	0	0	0
	Gov Eq 1 (12)	0	0	0	0	0	0	0	0	0	0	0	0	0	0	0	0	0	0	0	0	0	0	0	1	0	-2	0	1	0	0	0	0	0	0	0	0	0	0	0	0	0	0	0	0	0	0	0	0
	Gov Eq 2 (12)	0	0	0	0	0	0	0	0	0	0	0	0	0	0	0	0	0	0	0	0	0	0	0.103112	-3.9168	-0.206225	8.3984	0.103112	-3.4816	0	0	0	0	0	0	0	0	0	0	0	0	0	0	0	0	0	0	0	0
	Gov Eq 1 (13)	0	0	0	0	0	0	0	0	0	0	0	0	0	0	0	0	0	0	0	0	0	0	0	0	0	1	0	-2	0	1	0	0	0	0	0	0	0	0	0	0	0	0	0	0	0	0	0	0
	Gov Eq 2 (13)	0	0	0	0	0	0	0	0	0	0	0	0	0	0	0	0	0	0	0	0	0	0	0	0	0.1296	-4.3776	-0.2592	9.2944	0.1296	-3.9168	0	0	0	0	0	0	0	0	0	0	0	0	0	0	0	0	0	0
	Gov Eq 1 (14)	0	0	0	0	0	0	0	0	0	0	0	0	0	0	0	0	0	0	0	0	0	0	0	0	0	0	0	1	0	-2	0	1	0	0	0	0	0	0	0	0	0	0	0	0	0	0	0	0
	Gov Eq 2 (14)	0	0	0	0	0	0	0	0	0	0	0	0	0	0	0	0	0	0	0	0	0	0	0	0	0	0	0.16089	-4.864	-0.32178	10.2416	0.16089	-4.3776	0	0	0	0	0	0	0	0	0	0	0	0	0	0	0	0
	Gov Eq 1 (15)	0	0	0	0	0	0	0	0	0	0	0	0	0	0	0	0	0	0	0	0	0	0	0	0	0	0	0	0	0	1	0	-2	0	1	0	0	0	0	0	0	0	0	0	0	0	0	0	0
	Gov Eq 2 (15)	0	0	0	0	0	0	0	0	0	0	0	0	0	0	0	0	0	0	0	0	0	0	0	0	0	0	0	0	0.197531	-5.376	-0.395062	11.24	0.197531	-4.864	0	0	0	0	0	0	0	0	0	0	0	0	0	0
	Gov Eq 1 (16)	0	0	0	0	0	0	0	0	0	0	0	0	0	0	0	0	0	0	0	0	0	0	0	0	0	0	0	0	0	0	0	1	0	-2	0	1	0	0	0	0	0	0	0	0	0	0	0	0
	Gov Eq 2 (16)	0	0	0	0	0	0	0	0	0	0	0	0	0	0	0	0	0	0	0	0	0	0	0	0	0	0	0	0	0	0	0.2401	-5.9136	-0.4802	12.2896	0.2401	-5.376	0	0	0	0	0	0	0	0	0	0	0	0
	Gov Eq 1 (17)	0	0	0	0	0	0	0	0	0	0	0	0	0	0	0	0	0	0	0	0	0	0	0	0	0	0	0	0	0	0	0	0	0	1	0	-2	0	1	0	0	0	0	0	0	0	0	0	0
	Gov Eq 2 (17)	0	0	0	0	0	0	0	0	0	0	0	0	0	0	0	0	0	0	0	0	0	0	0	0	0	0	0	0	0	0	0	0	0.289205	-6.4768	-0.57841	13.3904	0.289205	-5.9136	0	0	0	0	0	0	0	0	0	0
	Gov Eq 1 (18)	0	0	0	0	0	0	0	0	0	0	0	0	0	0	0	0	0	0	0	0	0	0	0	0	0	0	0	0	0	0	0	0	0	0	0	1	0	-2	0	1	0	0	0	0	0	0	0	0
	Gov Eq 2 (18)	0	0	0	0	0	0	0	0	0	0	0	0	0	0	0	0	0	0	0	0	0	0	0	0	0	0	0	0	0	0	0	0	0	0	0.345483	-7.0656	-0.690965	14.5424	0.345483	-6.4768	0	0	0	0	0	0	0	0
	Gov Eq 1 (19)	0	0	0	0	0	0	0	0	0	0	0	0	0	0	0	0	0	0	0	0	0	0	0	0	0	0	0	0	0	0	0	0	0	0	0	0	0	1	0	-2	0	1	0	0	0	0	0	0
	Gov Eq 2 (19)	0	0	0	0	0	0	0	0	0	0	0	0	0	0	0	0	0	0	0	0	0	0	0	0	0	0	0	0	0	0	0	0	0	0	0	0	0.4096	-7.68	-0.8192	15.7456	0.4096	-7.0656	0	0	0	0	0	0
	Gov Eq 1 (20)	0	0	0	0	0	0	0	0	0	0	0	0	0	0	0	0	0	0	0	0	0	0	0	0	0	0	0	0	0	0	0	0	0	0	0	0	0	0	0	1	0	-2	0	1	0	0	0	0
	Gov Eq 2 (20)	0	0	0	0	0	0	0	0	0	0	0	0	0	0	0	0	0	0	0	0	0	0	0	0	0	0	0	0	0	0	0	0	0	0	0	0	0	0	0.482253	-8.32	-0.964506	17	0.482253	-7.68	0	0	0	0
	Gov Eq 1 (21)	0	0	0	0	0	0	0	0	0	0	0	0	0	0	0	0	0	0	0	0	0	0	0	0	0	0	0	0	0	0	0	0	0	0	0	0	0	0	0	0	0	1	0	-2	0	1	0	0
	Gov Eq 2 (21)	0	0	0	0	0	0	0	0	0	0	0	0	0	0	0	0	0	0	0	0	0	0	0	0	0	0	0	0	0	0	0	0	0	0	0	0	0	0	0	0	0.564168	-8.9856	-1.12834	18.3056	0.564168	-8.32	0	0
	Gov Eq 1 (22)	0	0	0	0	0	0	0	0	0	0	0	0	0	0	0	0	0	0	0	0	0	0	0	0	0	0	0	0	0	0	0	0	0	0	0	0	0	0	0	0	0	0	0	1	0	-2	0	1
	Gov Eq 2 (22)	0	0	0	0	0	0	0	0	0	0	0	0	0	0	0	0	0	0	0	0	0	0	0	0	0	0	0	0	0	0	0	0	0	0	0	0	0	0	0	0	0	0	0.6561	-9.6768	-1.3122	19.6624	0.6561	-8.9856
	Gov Eq 1 (23)	0	0	0	0	0	0	0	0	0	0	0	0	0	0	0	0	0	0	0	0	0	0	0	0	0	0	0	0	0	0	0	0	0	0	0	0	0	0	0	0	0	0	0	0	0	1	0	-2
	Gov Eq 2 (23)	0	0	0	0	0	0	0	0	0	0	0	0	0	0	0	0	0	0	0	0	0	0	0	0	0	0	0	0	0	0	0	0	0	0	0	0	0	0	0	0	0	0	0	0	0.758835	-10.3936	-1.51767	21.0704
	Gov Eq 1 (24)	0	0	0	0	0	0	0	0	0	0	0	0	0	0	0	0	0	0	0	0	0	0	0	0	0	0	0	0	0	0	0	0	0	0	0	0	0	0	0	0	0	0	0	0	0	0	0	1
	Gov Eq 2 (24)	0	0	0	0	0	0	0	0	0	0	0	0	0	0	0	0	0	0	0	0	0	0	0	0	0	0	0	0	0	0	0	0	0	0	0	0	0	0	0	0	0	0	0	0	0	0	0.873186	-11.136
	Gov Eq 1 (25)	0	0	0	0	0	0	0	0	0	0	0	0	0	0	0	0	0	0	0	0	0	0	0	0	0	0	0	0	0	0	0	0	0	0	0	0	0	0	0	0	0	0	0	0	0	0	0	0
	Gov Eq 2 (25)	0	0	0	0	0	0	0	0	0	0	0	0	0	0	0	0	0	0	0	0	0	0	0	0	0	0	0	0	0	0	0	0	0	0	0	0	0	0	0	0	0	0	0	0	0	0	0	0
	Bo Co 1 (1)	0	0	1	0	0	0	0	0	0	0	0	0	0	0	0	0	0	0	0	0	0	0	0	0	0	0	0	0	0	0	0	0	0	0	0	0	0	0	0	0	0	0	0	0	0	0	0	0
	Bo Co 2 (1)	0	0	0	1	0	0	0	0	0	0	0	0	0	0	0	0	0	0	0	0	0	0	0	0	0	0	0	0	0	0	0	0	0	0	0	0	0	0	0	0	0	0	0	0	0	0	0	0
	Bo Co 1 (25)	0	0	0	0	0	0	0	0	0	0	0	0	0	0	0	0	0	0	0	0	0	0	0	0	0	0	0	0	0	0	0	0	0	0	0	0	0	0	0	0	0	0	0	0	0	0	0	0
	Bo Co 2 (25)	0	0	0	0	0	0	0	0	0	0	0	0	0	0	0	0	0	0	0	0	0	0	0	0	0	0	0	0	0	0	0	0	0	0	0	0	0	0	0	0	0	0	0	0	0	0	0	0
			W0	-1135.93
			hk2M0	-0.757266
			W1	0
			hk2M1	-1.37065e-17
			W2	1033.6		X[m]	hk2M0	-0.757266				FDM		Exact
			hk2M2	0.633809		0	hk2M1	-1.37065e-17			M1 =	-1.23358e-16	kNm	0
			W3	1792.68		1	hk2M4	1.53106			M4 =	13.7795	kNm	13.7664
			hk2M3	1.14416		2	hk2M7	1.951			M7 =	17.559	kNm	17.5328
			W4	2287.32		3	hk2M10	1.25984			M10 =	11.3385	kNm	11.2993
			hk2M4	1.53106		4	hk2M13	-0.54244			M13 =	-4.88196	kNm	-4.93433
			W5	2567.89		5	hk2M16	-3.45583			M16 =	-31.1025	kNm	-31.1679
			hk2M5	1.7945		6	hk2M19	-7.48033			M19 =	-67.3229	kNm	-67.4015
			W6	2686.13		7	hk2M22	-12.6159			M22 =	-113.543	kNm	-113.635
			hk2M6	1.93448		8	hk2M25	-18.8627			M25 =	-169.764	kNm	-169.869
			W7	2685.54			hk2M26	-21.1918
			hk2M7	1.951
			W8	2600.4
			hk2M8	1.84407
			W9	2456.97
			hk2M9	1.61368
			W10	2275.2
			hk2M10	1.25984
			W11	2070.14
			hk2M11	0.782535
			W12	1853.13
			hk2M12	0.181776
			W13	1632.72
			hk2M13	-0.54244
			W14	1415.35
			hk2M14	-1.39011
			W15	1205.82
			hk2M15	-2.36124
			W16	1007.72
			hk2M16	-3.45583
			W17	823.7
			hk2M17	-4.67387
			W18	655.689
			hk2M18	-6.01537
			W19	505.062
			hk2M19	-7.48033
			W20	372.764
			hk2M20	-9.06874
			W21	259.414
			hk2M21	-10.7806
			W22	165.371
			hk2M22	-12.6159
			W23	90.8002
			hk2M23	-14.5747
			W24	35.7117
			hk2M24	-16.657
			W25	-2.8507e-14
			hk2M25	-18.8627
			W26	-16.5298
			hk2M26	-21.1918
[truncated: 7 more columns]
