# Supplementary material for: Timoshenko Beam Theory:First-Order Analysis, Second-Order Analysis, Stability, and Vibration Analysis Using the Finite Difference Method
Source: Preprints.org preprint supplement (doi:10.20944/preprints202105.0252.v1), 2021-05-11
Supplement: Supplementary file 7 [file Vibration analysis of a fixed pinned beam with an axial load.xlsx]

## Sheet: w-fi FDM approximation
		Free vibration of a fixed-pinned Timoshenko beam
		resting on Winkler foundation and subjected to a compressive force
		W-F FDM approximation
			Nine-point grid							The governing equations
		blk =	0.125				0.416667
		a = EI/kGAl²=	0.0375				0.324139
		kRI =	0.01
							0.633867
	Coefficient of axial force		-5.92176
							2.39527
Winkler foundation			77.9273
			-0.0925275					0	7.32425	7.86512
								0.2 p4	8.50792	8.98023
								0.4 p4	9.54555	9.97105
								0.6 p4	10.4806	10.8716
			11.7028		Determinant =	2.57037e-08		0.8 p4	11.3384	11.7028
	W0	hkF0	W1	hkF1	W2	hkF2	W3	hkF3	W4	hkF4	W5	hkF5	W6	hkF6	W7	hkF7	W8	hkF8	W9	hkF9	W10	hkF10
Gov Eq 1 (1)	0.324139	0.208333	-0.633867	0	0.324139	-0.208333	0	0	0	0	0	0	0	0	0	0	0	0	0	0	0	0
Gov Eq 2 (1)	-0.208333	1	0	-2.39527	0.208333	1	0	0	0	0	0	0	0	0	0	0	0	0	0	0	0	0
Gov Eq 1 (2)	0	0	0.324139	0.208333	-0.633867	0	0.324139	-0.208333	0	0	0	0	0	0	0	0	0	0	0	0	0	0
Gov Eq 2 (2)	0	0	-0.208333	1	0	-2.39527	0.208333	1	0	0	0	0	0	0	0	0	0	0	0	0	0	0
Gov Eq 1 (3)	0	0	0	0	0.324139	0.208333	-0.633867	0	0.324139	-0.208333	0	0	0	0	0	0	0	0	0	0	0	0
Gov Eq 2 (3)	0	0	0	0	-0.208333	1	0	-2.39527	0.208333	1	0	0	0	0	0	0	0	0	0	0	0	0
Gov Eq 1 (4)	0	0	0	0	0	0	0.324139	0.208333	-0.633867	0	0.324139	-0.208333	0	0	0	0	0	0	0	0	0	0
Gov Eq 2 (4)	0	0	0	0	0	0	-0.208333	1	0	-2.39527	0.208333	1	0	0	0	0	0	0	0	0	0	0
Gov Eq 1 (5)	0	0	0	0	0	0	0	0	0.324139	0.208333	-0.633867	0	0.324139	-0.208333	0	0	0	0	0	0	0	0
Gov Eq 2 (5)	0	0	0	0	0	0	0	0	-0.208333	1	0	-2.39527	0.208333	1	0	0	0	0	0	0	0	0
Gov Eq 1 (6)	0	0	0	0	0	0	0	0	0	0	0.324139	0.208333	-0.633867	0	0.324139	-0.208333	0	0	0	0	0	0
Gov Eq 2 (6)	0	0	0	0	0	0	0	0	0	0	-0.208333	1	0	-2.39527	0.208333	1	0	0	0	0	0	0
Gov Eq 1 (7)	0	0	0	0	0	0	0	0	0	0	0	0	0.324139	0.208333	-0.633867	0	0.324139	-0.208333	0	0	0	0
Gov Eq 2 (7)	0	0	0	0	0	0	0	0	0	0	0	0	-0.208333	1	0	-2.39527	0.208333	1	0	0	0	0
Gov Eq 1 (8)	0	0	0	0	0	0	0	0	0	0	0	0	0	0	0.324139	0.208333	-0.633867	0	0.324139	-0.208333	0	0
Gov Eq 2 (8)	0	0	0	0	0	0	0	0	0	0	0	0	0	0	-0.208333	1	0	-2.39527	0.208333	1	0	0
Gov Eq 1 (9)	0	0	0	0	0	0	0	0	0	0	0	0	0	0	0	0	0.324139	0.208333	-0.633867	0	0.324139	-0.208333
Gov Eq 2 (9)	0	0	0	0	0	0	0	0	0	0	0	0	0	0	0	0	-0.208333	1	0	-2.39527	0.208333	1
BoCo 1 (1)	0	0	1	0	0	0	0	0	0	0	0	0	0	0	0	0	0	0	0	0	0	0
BoCo 2 (1)	0	0	0	1	0	0	0	0	0	0	0	0	0	0	0	0	0	0	0	0	0	0
BoCo 1 (9)	0	0	0	0	0	0	0	0	0	0	0	0	0	0	0	0	0	0	1	0	0	0
BoCo 2 (9)	0	0	0	0	0	0	0	0	0	0	0	0	0	0	0	0	0	1	0	0	0	-1
	W-F FDM approximation
		Seventeen-point grid								The governing equations
		blk =	0.0625				0.104167
		a = EI/kGAl²=	0.0375				0.0810348
		kRI =	0.01
							0.161264
	Coefficient of axial force		-5.92176
							2.09906
Winkler foundation			77.9273
										9 pt	17 pt	25 pt
			-0.0231319					0	7.32425	7.86512	7.46801
								0.2 p4	8.50792	8.98023	8.63265
								0.4 p4	9.54555	9.97105	9.65748
								0.6 p4	10.4806	10.8716	10.5832
			11.4339		Determinant =	-4.29295e-06		0.8 p4	11.3384	11.7028	11.4339
	W0	hkF0	W1	hkF1	W2	hkF2	W3	hkF3	W4	hkF4	W5	hkF5	W6	hkF6	W7	hkF7	W8	hkF8	W9	hkF9	W10	hkF10	W11	hkF11	W12	hkF12	W13	hkF13	W14	hkF14	W15	hkF15	W16	hkF16	W17	hkF17	W18	hkF18
Gov Eq 1 (1)	0.0810348	0.0520833	-0.161264	0	0.0810348	-0.0520833	0	0	0	0	0	0	0	0	0	0	0	0	0	0	0	0	0	0	0	0	0	0	0	0	0	0	0	0	0	0	0	0
Gov Eq 2 (1)	-0.0520833	1	0	-2.09906	0.0520833	1	0	0	0	0	0	0	0	0	0	0	0	0	0	0	0	0	0	0	0	0	0	0	0	0	0	0	0	0	0	0	0	0
Gov Eq 1 (2)	0	0	0.0810348	0.0520833	-0.161264	0	0.0810348	-0.0520833	0	0	0	0	0	0	0	0	0	0	0	0	0	0	0	0	0	0	0	0	0	0	0	0	0	0	0	0	0	0
Gov Eq 2 (2)	0	0	-0.0520833	1	0	-2.09906	0.0520833	1	0	0	0	0	0	0	0	0	0	0	0	0	0	0	0	0	0	0	0	0	0	0	0	0	0	0	0	0	0	0
Gov Eq 1 (3)	0	0	0	0	0.0810348	0.0520833	-0.161264	0	0.0810348	-0.0520833	0	0	0	0	0	0	0	0	0	0	0	0	0	0	0	0	0	0	0	0	0	0	0	0	0	0	0	0
Gov Eq 2 (3)	0	0	0	0	-0.0520833	1	0	-2.09906	0.0520833	1	0	0	0	0	0	0	0	0	0	0	0	0	0	0	0	0	0	0	0	0	0	0	0	0	0	0	0	0
Gov Eq 1 (4)	0	0	0	0	0	0	0.0810348	0.0520833	-0.161264	0	0.0810348	-0.0520833	0	0	0	0	0	0	0	0	0	0	0	0	0	0	0	0	0	0	0	0	0	0	0	0	0	0
Gov Eq 2 (4)	0	0	0	0	0	0	-0.0520833	1	0	-2.09906	0.0520833	1	0	0	0	0	0	0	0	0	0	0	0	0	0	0	0	0	0	0	0	0	0	0	0	0	0	0
Gov Eq 1 (5)	0	0	0	0	0	0	0	0	0.0810348	0.0520833	-0.161264	0	0.0810348	-0.0520833	0	0	0	0	0	0	0	0	0	0	0	0	0	0	0	0	0	0	0	0	0	0	0	0
Gov Eq 2 (5)	0	0	0	0	0	0	0	0	-0.0520833	1	0	-2.09906	0.0520833	1	0	0	0	0	0	0	0	0	0	0	0	0	0	0	0	0	0	0	0	0	0	0	0	0
Gov Eq 1 (6)	0	0	0	0	0	0	0	0	0	0	0.0810348	0.0520833	-0.161264	0	0.0810348	-0.0520833	0	0	0	0	0	0	0	0	0	0	0	0	0	0	0	0	0	0	0	0	0	0
Gov Eq 2 (6)	0	0	0	0	0	0	0	0	0	0	-0.0520833	1	0	-2.09906	0.0520833	1	0	0	0	0	0	0	0	0	0	0	0	0	0	0	0	0	0	0	0	0	0	0
Gov Eq 1 (7)	0	0	0	0	0	0	0	0	0	0	0	0	0.0810348	0.0520833	-0.161264	0	0.0810348	-0.0520833	0	0	0	0	0	0	0	0	0	0	0	0	0	0	0	0	0	0	0	0
Gov Eq 2 (7)	0	0	0	0	0	0	0	0	0	0	0	0	-0.0520833	1	0	-2.09906	0.0520833	1	0	0	0	0	0	0	0	0	0	0	0	0	0	0	0	0	0	0	0	0
Gov Eq 1 (8)	0	0	0	0	0	0	0	0	0	0	0	0	0	0	0.0810348	0.0520833	-0.161264	0	0.0810348	-0.0520833	0	0	0	0	0	0	0	0	0	0	0	0	0	0	0	0	0	0
Gov Eq 2 (8)	0	0	0	0	0	0	0	0	0	0	0	0	0	0	-0.0520833	1	0	-2.09906	0.0520833	1	0	0	0	0	0	0	0	0	0	0	0	0	0	0	0	0	0	0
Gov Eq 1 (9)	0	0	0	0	0	0	0	0	0	0	0	0	0	0	0	0	0.0810348	0.0520833	-0.161264	0	0.0810348	-0.0520833	0	0	0	0	0	0	0	0	0	0	0	0	0	0	0	0
Gov Eq 2 (9)	0	0	0	0	0	0	0	0	0	0	0	0	0	0	0	0	-0.0520833	1	0	-2.09906	0.0520833	1	0	0	0	0	0	0	0	0	0	0	0	0	0	0	0	0
Gov Eq 1 (10)	0	0	0	0	0	0	0	0	0	0	0	0	0	0	0	0	0	0	0.0810348	0.0520833	-0.161264	0	0.0810348	-0.0520833	0	0	0	0	0	0	0	0	0	0	0	0	0	0
Gov Eq 2 (10)	0	0	0	0	0	0	0	0	0	0	0	0	0	0	0	0	0	0	-0.0520833	1	0	-2.09906	0.0520833	1	0	0	0	0	0	0	0	0	0	0	0	0	0	0
Gov Eq 1 (11)	0	0	0	0	0	0	0	0	0	0	0	0	0	0	0	0	0	0	0	0	0.0810348	0.0520833	-0.161264	0	0.0810348	-0.0520833	0	0	0	0	0	0	0	0	0	0	0	0
Gov Eq 2 (11)	0	0	0	0	0	0	0	0	0	0	0	0	0	0	0	0	0	0	0	0	-0.0520833	1	0	-2.09906	0.0520833	1	0	0	0	0	0	0	0	0	0	0	0	0
Gov Eq 1 (12)	0	0	0	0	0	0	0	0	0	0	0	0	0	0	0	0	0	0	0	0	0	0	0.0810348	0.0520833	-0.161264	0	0.0810348	-0.0520833	0	0	0	0	0	0	0	0	0	0
Gov Eq 2 (12)	0	0	0	0	0	0	0	0	0	0	0	0	0	0	0	0	0	0	0	0	0	0	-0.0520833	1	0	-2.09906	0.0520833	1	0	0	0	0	0	0	0	0	0	0
Gov Eq 1 (13)	0	0	0	0	0	0	0	0	0	0	0	0	0	0	0	0	0	0	0	0	0	0	0	0	0.0810348	0.0520833	-0.161264	0	0.0810348	-0.0520833	0	0	0	0	0	0	0	0
Gov Eq 2 (13)	0	0	0	0	0	0	0	0	0	0	0	0	0	0	0	0	0	0	0	0	0	0	0	0	-0.0520833	1	0	-2.09906	0.0520833	1	0	0	0	0	0	0	0	0
Gov Eq 1 (14)	0	0	0	0	0	0	0	0	0	0	0	0	0	0	0	0	0	0	0	0	0	0	0	0	0	0	0.0810348	0.0520833	-0.161264	0	0.0810348	-0.0520833	0	0	0	0	0	0
Gov Eq 2 (14)	0	0	0	0	0	0	0	0	0	0	0	0	0	0	0	0	0	0	0	0	0	0	0	0	0	0	-0.0520833	1	0	-2.09906	0.0520833	1	0	0	0	0	0	0
Gov Eq 1 (15)	0	0	0	0	0	0	0	0	0	0	0	0	0	0	0	0	0	0	0	0	0	0	0	0	0	0	0	0	0.0810348	0.0520833	-0.161264	0	0.0810348	-0.0520833	0	0	0	0
Gov Eq 2 (15)	0	0	0	0	0	0	0	0	0	0	0	0	0	0	0	0	0	0	0	0	0	0	0	0	0	0	0	0	-0.0520833	1	0	-2.09906	0.0520833	1	0	0	0	0
Gov Eq 1 (16)	0	0	0	0	0	0	0	0	0	0	0	0	0	0	0	0	0	0	0	0	0	0	0	0	0	0	0	0	0	0	0.0810348	0.0520833	-0.161264	0	0.0810348	-0.0520833	0	0
Gov Eq 2 (16)	0	0	0	0	0	0	0	0	0	0	0	0	0	0	0	0	0	0	0	0	0	0	0	0	0	0	0	0	0	0	-0.0520833	1	0	-2.09906	0.0520833	1	0	0
Gov Eq 1 (17)	0	0	0	0	0	0	0	0	0	0	0	0	0	0	0	0	0	0	0	0	0	0	0	0	0	0	0	0	0	0	0	0	0.0810348	0.0520833	-0.161264	0	0.0810348	-0.0520833
Gov Eq 2 (17)	0	0	0	0	0	0	0	0	0	0	0	0	0	0	0	0	0	0	0	0	0	0	0	0	0	0	0	0	0	0	0	0	-0.0520833	1	0	-2.09906	0.0520833	1
BoCo 1 (1)	0	0	1	0	0	0	0	0	0	0	0	0	0	0	0	0	0	0	0	0	0	0	0	0	0	0	0	0	0	0	0	0	0	0	0	0	0	0
BoCo 2 (1)	0	0	0	1	0	0	0	0	0	0	0	0	0	0	0	0	0	0	0	0	0	0	0	0	0	0	0	0	0	0	0	0	0	0	0	0	0	0
BoCo 1 (17)	0	0	0	0	0	0	0	0	0	0	0	0	0	0	0	0	0	0	0	0	0	0	0	0	0	0	0	0	0	0	0	0	0	0	1	0	0	0
BoCo 2 (17)	0	0	0	0	0	0	0	0	0	0	0	0	0	0	0	0	0	0	0	0	0	0	0	0	0	0	0	0	0	0	0	0	0	1	0	0	0	-1
	W-F FDM approximation
		Twenty five-point grid								The governing equations
		blk =	0.0416667				0.0462963
		a = EI/kGAl²=	0.0375				0.0360155
		kRI =	0.01
							0.0718754
	Coefficient of axial force		-5.92176
							2.04405
Winkler foundation			77.9273
										9 pt	17 pt	25 pt
			-0.0102808					0	7.32425	7.86512	7.46801	7.38891
								0.2 p4	8.50792	8.98023	8.63265	8.56394
								0.4 p4	9.54555	9.97105	9.65748	9.59578
								0.6 p4	10.4806	10.8716	10.5832	10.5266
			11.3812		Determinant =	-2.2001e-08		0.8 p4	11.3384	11.7028	11.4339	11.3812
	W0	hkF0	W1	hkF1	W2	hkF2	W3	hkF3	W4	hkF4	W5	hkF5	W6	hkF6	W7	hkF7	W8	hkF8	W9	hkF9	W10	hkF10	W11	hkF11	W12	hkF12	W13	hkF13	W14	hkF14	W15	hkF15	W16	hkF16	W17	hkF17	W18	hkF18	W19	hkF19	W20	hkF20	W21	hkF21	W22	hkF22	W23	hkF23	W24
Gov Eq 1 (1)	0.0360155	0.0231481	-0.0718754	0	0.0360155	-0.0231481	0	0	0	0	0	0	0	0	0	0	0	0	0	0	0	0	0	0	0	0	0	0	0	0	0	0	0	0	0	0	0	0	0	0	0	0	0	0	0	0	0	0	0
Gov Eq 2 (1)	-0.0231481	1	0	-2.04405	0.0231481	1	0	0	0	0	0	0	0	0	0	0	0	0	0	0	0	0	0	0	0	0	0	0	0	0	0	0	0	0	0	0	0	0	0	0	0	0	0	0	0	0	0	0	0
Gov Eq 1 (2)	0	0	0.0360155	0.0231481	-0.0718754	0	0.0360155	-0.0231481	0	0	0	0	0	0	0	0	0	0	0	0	0	0	0	0	0	0	0	0	0	0	0	0	0	0	0	0	0	0	0	0	0	0	0	0	0	0	0	0	0
Gov Eq 2 (2)	0	0	-0.0231481	1	0	-2.04405	0.0231481	1	0	0	0	0	0	0	0	0	0	0	0	0	0	0	0	0	0	0	0	0	0	0	0	0	0	0	0	0	0	0	0	0	0	0	0	0	0	0	0	0	0
Gov Eq 1 (3)	0	0	0	0	0.0360155	0.0231481	-0.0718754	0	0.0360155	-0.0231481	0	0	0	0	0	0	0	0	0	0	0	0	0	0	0	0	0	0	0	0	0	0	0	0	0	0	0	0	0	0	0	0	0	0	0	0	0	0	0
Gov Eq 2 (3)	0	0	0	0	-0.0231481	1	0	-2.04405	0.0231481	1	0	0	0	0	0	0	0	0	0	0	0	0	0	0	0	0	0	0	0	0	0	0	0	0	0	0	0	0	0	0	0	0	0	0	0	0	0	0	0
Gov Eq 1 (4)	0	0	0	0	0	0	0.0360155	0.0231481	-0.0718754	0	0.0360155	-0.0231481	0	0	0	0	0	0	0	0	0	0	0	0	0	0	0	0	0	0	0	0	0	0	0	0	0	0	0	0	0	0	0	0	0	0	0	0	0
Gov Eq 2 (4)	0	0	0	0	0	0	-0.0231481	1	0	-2.04405	0.0231481	1	0	0	0	0	0	0	0	0	0	0	0	0	0	0	0	0	0	0	0	0	0	0	0	0	0	0	0	0	0	0	0	0	0	0	0	0	0
Gov Eq 1 (5)	0	0	0	0	0	0	0	0	0.0360155	0.0231481	-0.0718754	0	0.0360155	-0.0231481	0	0	0	0	0	0	0	0	0	0	0	0	0	0	0	0	0	0	0	0	0	0	0	0	0	0	0	0	0	0	0	0	0	0	0
Gov Eq 2 (5)	0	0	0	0	0	0	0	0	-0.0231481	1	0	-2.04405	0.0231481	1	0	0	0	0	0	0	0	0	0	0	0	0	0	0	0	0	0	0	0	0	0	0	0	0	0	0	0	0	0	0	0	0	0	0	0
Gov Eq 1 (6)	0	0	0	0	0	0	0	0	0	0	0.0360155	0.0231481	-0.0718754	0	0.0360155	-0.0231481	0	0	0	0	0	0	0	0	0	0	0	0	0	0	0	0	0	0	0	0	0	0	0	0	0	0	0	0	0	0	0	0	0
Gov Eq 2 (6)	0	0	0	0	0	0	0	0	0	0	-0.0231481	1	0	-2.04405	0.0231481	1	0	0	0	0	0	0	0	0	0	0	0	0	0	0	0	0	0	0	0	0	0	0	0	0	0	0	0	0	0	0	0	0	0
Gov Eq 1 (7)	0	0	0	0	0	0	0	0	0	0	0	0	0.0360155	0.0231481	-0.0718754	0	0.0360155	-0.0231481	0	0	0	0	0	0	0	0	0	0	0	0	0	0	0	0	0	0	0	0	0	0	0	0	0	0	0	0	0	0	0
Gov Eq 2 (7)	0	0	0	0	0	0	0	0	0	0	0	0	-0.0231481	1	0	-2.04405	0.0231481	1	0	0	0	0	0	0	0	0	0	0	0	0	0	0	0	0	0	0	0	0	0	0	0	0	0	0	0	0	0	0	0
Gov Eq 1 (8)	0	0	0	0	0	0	0	0	0	0	0	0	0	0	0.0360155	0.0231481	-0.0718754	0	0.0360155	-0.0231481	0	0	0	0	0	0	0	0	0	0	0	0	0	0	0	0	0	0	0	0	0	0	0	0	0	0	0	0	0
Gov Eq 2 (8)	0	0	0	0	0	0	0	0	0	0	0	0	0	0	-0.0231481	1	0	-2.04405	0.0231481	1	0	0	0	0	0	0	0	0	0	0	0	0	0	0	0	0	0	0	0	0	0	0	0	0	0	0	0	0	0
Gov Eq 1 (9)	0	0	0	0	0	0	0	0	0	0	0	0	0	0	0	0	0.0360155	0.0231481	-0.0718754	0	0.0360155	-0.0231481	0	0	0	0	0	0	0	0	0	0	0	0	0	0	0	0	0	0	0	0	0	0	0	0	0	0	0
Gov Eq 2 (9)	0	0	0	0	0	0	0	0	0	0	0	0	0	0	0	0	-0.0231481	1	0	-2.04405	0.0231481	1	0	0	0	0	0	0	0	0	0	0	0	0	0	0	0	0	0	0	0	0	0	0	0	0	0	0	0
Gov Eq 1 (10)	0	0	0	0	0	0	0	0	0	0	0	0	0	0	0	0	0	0	0.0360155	0.0231481	-0.0718754	0	0.0360155	-0.0231481	0	0	0	0	0	0	0	0	0	0	0	0	0	0	0	0	0	0	0	0	0	0	0	0	0
Gov Eq 2 (10)	0	0	0	0	0	0	0	0	0	0	0	0	0	0	0	0	0	0	-0.0231481	1	0	-2.04405	0.0231481	1	0	0	0	0	0	0	0	0	0	0	0	0	0	0	0	0	0	0	0	0	0	0	0	0	0
Gov Eq 1 (11)	0	0	0	0	0	0	0	0	0	0	0	0	0	0	0	0	0	0	0	0	0.0360155	0.0231481	-0.0718754	0	0.0360155	-0.0231481	0	0	0	0	0	0	0	0	0	0	0	0	0	0	0	0	0	0	0	0	0	0	0
Gov Eq 2 (11)	0	0	0	0	0	0	0	0	0	0	0	0	0	0	0	0	0	0	0	0	-0.0231481	1	0	-2.04405	0.0231481	1	0	0	0	0	0	0	0	0	0	0	0	0	0	0	0	0	0	0	0	0	0	0	0
Gov Eq 1 (12)	0	0	0	0	0	0	0	0	0	0	0	0	0	0	0	0	0	0	0	0	0	0	0.0360155	0.0231481	-0.0718754	0	0.0360155	-0.0231481	0	0	0	0	0	0	0	0	0	0	0	0	0	0	0	0	0	0	0	0	0
Gov Eq 2 (12)	0	0	0	0	0	0	0	0	0	0	0	0	0	0	0	0	0	0	0	0	0	0	-0.0231481	1	0	-2.04405	0.0231481	1	0	0	0	0	0	0	0	0	0	0	0	0	0	0	0	0	0	0	0	0	0
Gov Eq 1 (13)	0	0	0	0	0	0	0	0	0	0	0	0	0	0	0	0	0	0	0	0	0	0	0	0	0.0360155	0.0231481	-0.0718754	0	0.0360155	-0.0231481	0	0	0	0	0	0	0	0	0	0	0	0	0	0	0	0	0	0	0
Gov Eq 2 (13)	0	0	0	0	0	0	0	0	0	0	0	0	0	0	0	0	0	0	0	0	0	0	0	0	-0.0231481	1	0	-2.04405	0.0231481	1	0	0	0	0	0	0	0	0	0	0	0	0	0	0	0	0	0	0	0
Gov Eq 1 (14)	0	0	0	0	0	0	0	0	0	0	0	0	0	0	0	0	0	0	0	0	0	0	0	0	0	0	0.0360155	0.0231481	-0.0718754	0	0.0360155	-0.0231481	0	0	0	0	0	0	0	0	0	0	0	0	0	0	0	0	0
Gov Eq 2 (14)	0	0	0	0	0	0	0	0	0	0	0	0	0	0	0	0	0	0	0	0	0	0	0	0	0	0	-0.0231481	1	0	-2.04405	0.0231481	1	0	0	0	0	0	0	0	0	0	0	0	0	0	0	0	0	0
Gov Eq 1 (15)	0	0	0	0	0	0	0	0	0	0	0	0	0	0	0	0	0	0	0	0	0	0	0	0	0	0	0	0	0.0360155	0.0231481	-0.0718754	0	0.0360155	-0.0231481	0	0	0	0	0	0	0	0	0	0	0	0	0	0	0
Gov Eq 2 (15)	0	0	0	0	0	0	0	0	0	0	0	0	0	0	0	0	0	0	0	0	0	0	0	0	0	0	0	0	-0.0231481	1	0	-2.04405	0.0231481	1	0	0	0	0	0	0	0	0	0	0	0	0	0	0	0
Gov Eq 1 (16)	0	0	0	0	0	0	0	0	0	0	0	0	0	0	0	0	0	0	0	0	0	0	0	0	0	0	0	0	0	0	0.0360155	0.0231481	-0.0718754	0	0.0360155	-0.0231481	0	0	0	0	0	0	0	0	0	0	0	0	0
Gov Eq 2 (16)	0	0	0	0	0	0	0	0	0	0	0	0	0	0	0	0	0	0	0	0	0	0	0	0	0	0	0	0	0	0	-0.0231481	1	0	-2.04405	0.0231481	1	0	0	0	0	0	0	0	0	0	0	0	0	0
Gov Eq 1 (17)	0	0	0	0	0	0	0	0	0	0	0	0	0	0	0	0	0	0	0	0	0	0	0	0	0	0	0	0	0	0	0	0	0.0360155	0.0231481	-0.0718754	0	0.0360155	-0.0231481	0	0	0	0	0	0	0	0	0	0	0
Gov Eq 2 (17)	0	0	0	0	0	0	0	0	0	0	0	0	0	0	0	0	0	0	0	0	0	0	0	0	0	0	0	0	0	0	0	0	-0.0231481	1	0	-2.04405	0.0231481	1	0	0	0	0	0	0	0	0	0	0	0
Gov Eq 1 (18)	0	0	0	0	0	0	0	0	0	0	0	0	0	0	0	0	0	0	0	0	0	0	0	0	0	0	0	0	0	0	0	0	0	0	0.0360155	0.0231481	-0.0718754	0	0.0360155	-0.0231481	0	0	0	0	0	0	0	0	0
Gov Eq 2 (18)	0	0	0	0	0	0	0	0	0	0	0	0	0	0	0	0	0	0	0	0	0	0	0	0	0	0	0	0	0	0	0	0	0	0	-0.0231481	1	0	-2.04405	0.0231481	1	0	0	0	0	0	0	0	0	0
Gov Eq 1 (19)	0	0	0	0	0	0	0	0	0	0	0	0	0	0	0	0	0	0	0	0	0	0	0	0	0	0	0	0	0	0	0	0	0	0	0	0	0.0360155	0.0231481	-0.0718754	0	0.0360155	-0.0231481	0	0	0	0	0	0	0
Gov Eq 2 (19)	0	0	0	0	0	0	0	0	0	0	0	0	0	0	0	0	0	0	0	0	0	0	0	0	0	0	0	0	0	0	0	0	0	0	0	0	-0.0231481	1	0	-2.04405	0.0231481	1	0	0	0	0	0	0	0
Gov Eq 1 (20)	0	0	0	0	0	0	0	0	0	0	0	0	0	0	0	0	0	0	0	0	0	0	0	0	0	0	0	0	0	0	0	0	0	0	0	0	0	0	0.0360155	0.0231481	-0.0718754	0	0.0360155	-0.0231481	0	0	0	0	0
Gov Eq 2 (20)	0	0	0	0	0	0	0	0	0	0	0	0	0	0	0	0	0	0	0	0	0	0	0	0	0	0	0	0	0	0	0	0	0	0	0	0	0	0	-0.0231481	1	0	-2.04405	0.0231481	1	0	0	0	0	0
Gov Eq 1 (21)	0	0	0	0	0	0	0	0	0	0	0	0	0	0	0	0	0	0	0	0	0	0	0	0	0	0	0	0	0	0	0	0	0	0	0	0	0	0	0	0	0.0360155	0.0231481	-0.0718754	0	0.0360155	-0.0231481	0	0	0
Gov Eq 2 (21)	0	0	0	0	0	0	0	0	0	0	0	0	0	0	0	0	0	0	0	0	0	0	0	0	0	0	0	0	0	0	0	0	0	0	0	0	0	0	0	0	-0.0231481	1	0	-2.04405	0.0231481	1	0	0	0
Gov Eq 1 (22)	0	0	0	0	0	0	0	0	0	0	0	0	0	0	0	0	0	0	0	0	0	0	0	0	0	0	0	0	0	0	0	0	0	0	0	0	0	0	0	0	0	0	0.0360155	0.0231481	-0.0718754	0	0.0360155	-0.0231481	0
Gov Eq 2 (22)	0	0	0	0	0	0	0	0	0	0	0	0	0	0	0	0	0	0	0	0	0	0	0	0	0	0	0	0	0	0	0	0	0	0	0	0	0	0	0	0	0	0	-0.0231481	1	0	-2.04405	0.0231481	1	0
Gov Eq 1 (23)	0	0	0	0	0	0	0	0	0	0	0	0	0	0	0	0	0	0	0	0	0	0	0	0	0	0	0	0	0	0	0	0	0	0	0	0	0	0	0	0	0	0	0	0	0.0360155	0.0231481	-0.0718754	0	0.0360155
Gov Eq 2 (23)	0	0	0	0	0	0	0	0	0	0	0	0	0	0	0	0	0	0	0	0	0	0	0	0	0	0	0	0	0	0	0	0	0	0	0	0	0	0	0	0	0	0	0	0	-0.0231481	1	0	-2.04405	0.0231481
Gov Eq 1 (24)	0	0	0	0	0	0	0	0	0	0	0	0	0	0	0	0	0	0	0	0	0	0	0	0	0	0	0	0	0	0	0	0	0	0	0	0	0	0	0	0	0	0	0	0	0	0	0.0360155	0.0231481	-0.0718754
Gov Eq 2 (24)	0	0	0	0	0	0	0	0	0	0	0	0	0	0	0	0	0	0	0	0	0	0	0	0	0	0	0	0	0	0	0	0	0	0	0	0	0	0	0	0	0	0	0	0	0	0	-0.0231481	1	0
Gov Eq 1 (25)	0	0	0	0	0	0	0	0	0	0	0	0	0	0	0	0	0	0	0	0	0	0	0	0	0	0	0	0	0	0	0	0	0	0	0	0	0	0	0	0	0	0	0	0	0	0	0	0	0.0360155
Gov Eq 2 (25)	0	0	0	0	0	0	0	0	0	0	0	0	0	0	0	0	0	0	0	0	0	0	0	0	0	0	0	0	0	0	0	0	0	0	0	0	0	0	0	0	0	0	0	0	0	0	0	0	-0.0231481
BoCo 1 (1)	0	0	1	0	0	0	0	0	0	0	0	0	0	0	0	0	0	0	0	0	0	0	0	0	0	0	0	0	0	0	0	0	0	0	0	0	0	0	0	0	0	0	0	0	0	0	0	0	0
BoCo 2 (1)	0	0	0	1	0	0	0	0	0	0	0	0	0	0	0	0	0	0	0	0	0	0	0	0	0	0	0	0	0	0	0	0	0	0	0	0	0	0	0	0	0	0	0	0	0	0	0	0	0
BoCo 1 (25)	0	0	0	0	0	0	0	0	0	0	0	0	0	0	0	0	0	0	0	0	0	0	0	0	0	0	0	0	0	0	0	0	0	0	0	0	0	0	0	0	0	0	0	0	0	0	0	0	0
BoCo 2 (25)	0	0	0	0	0	0	0	0	0	0	0	0	0	0	0	0	0	0	0	0	0	0	0	0	0	0	0	0	0	0	0	0	0	0	0	0	0	0	0	0	0	0	0	0	0	0	0	0	0
	W-F FDM approximation
		Thirty three-point grid								The governing equations
		blk =	0.03125				0.0260417
		a = EI/kGAl²=	0.0375				0.0202587
		kRI =	0.01
							0.0404686
	Coefficient of axial force		-5.92176
							2.02478
Winkler foundation			77.9273
										9 pt	17 pt	25 pt
			-0.00578297					0	7.32425	7.86512	7.46801	7.38891	7.36077
								0.2 p4	8.50792	8.98023	8.63265	8.56394	8.53955
								0.4 p4	9.54555	9.97105	9.65748	9.59578	9.5739
								0.6 p4	10.4806	10.8716	10.5832	10.5266	10.5066
			11.3626		Determinant =	-3.70651e-08		0.8 p4	11.3384	11.7028	11.4339	11.3812	11.3626
	W0	hkF0	W1	hkF1	W2	hkF2	W3	hkF3	W4	hkF4	W5	hkF5	W6	hkF6	W7	hkF7	W8	hkF8	W9	hkF9	W10	hkF10	W11	hkF11	W12	hkF12	W13	hkF13	W14	hkF14	W15	hkF15	W16	hkF16	W17	hkF17	W18	hkF18	W19	hkF19	W20	hkF20	W21	hkF21	W22	hkF22	W23	hkF23	W24
Gov Eq 1 (1)	0.0202587	0.0130208	-0.0404686	0	0.0202587	-0.0130208	0	0	0	0	0	0	0	0	0	0	0	0	0	0	0	0	0	0	0	0	0	0	0	0	0	0	0	0	0	0	0	0	0	0	0	0	0	0	0	0	0	0	0
Gov Eq 2 (1)	-0.0130208	1	0	-2.02478	0.0130208	1	0	0	0	0	0	0	0	0	0	0	0	0	0	0	0	0	0	0	0	0	0	0	0	0	0	0	0	0	0	0	0	0	0	0	0	0	0	0	0	0	0	0	0
Gov Eq 1 (2)	0	0	0.0202587	0.0130208	-0.0404686	0	0.0202587	-0.0130208	0	0	0	0	0	0	0	0	0	0	0	0	0	0	0	0	0	0	0	0	0	0	0	0	0	0	0	0	0	0	0	0	0	0	0	0	0	0	0	0	0
Gov Eq 2 (2)	0	0	-0.0130208	1	0	-2.02478	0.0130208	1	0	0	0	0	0	0	0	0	0	0	0	0	0	0	0	0	0	0	0	0	0	0	0	0	0	0	0	0	0	0	0	0	0	0	0	0	0	0	0	0	0
Gov Eq 1 (3)	0	0	0	0	0.0202587	0.0130208	-0.0404686	0	0.0202587	-0.0130208	0	0	0	0	0	0	0	0	0	0	0	0	0	0	0	0	0	0	0	0	0	0	0	0	0	0	0	0	0	0	0	0	0	0	0	0	0	0	0
Gov Eq 2 (3)	0	0	0	0	-0.0130208	1	0	-2.02478	0.0130208	1	0	0	0	0	0	0	0	0	0	0	0	0	0	0	0	0	0	0	0	0	0	0	0	0	0	0	0	0	0	0	0	0	0	0	0	0	0	0	0
Gov Eq 1 (4)	0	0	0	0	0	0	0.0202587	0.0130208	-0.0404686	0	0.0202587	-0.0130208	0	0	0	0	0	0	0	0	0	0	0	0	0	0	0	0	0	0	0	0	0	0	0	0	0	0	0	0	0	0	0	0	0	0	0	0	0
Gov Eq 2 (4)	0	0	0	0	0	0	-0.0130208	1	0	-2.02478	0.0130208	1	0	0	0	0	0	0	0	0	0	0	0	0	0	0	0	0	0	0	0	0	0	0	0	0	0	0	0	0	0	0	0	0	0	0	0	0	0
Gov Eq 1 (5)	0	0	0	0	0	0	0	0	0.0202587	0.0130208	-0.0404686	0	0.0202587	-0.0130208	0	0	0	0	0	0	0	0	0	0	0	0	0	0	0	0	0	0	0	0	0	0	0	0	0	0	0	0	0	0	0	0	0	0	0
Gov Eq 2 (5)	0	0	0	0	0	0	0	0	-0.0130208	1	0	-2.02478	0.0130208	1	0	0	0	0	0	0	0	0	0	0	0	0	0	0	0	0	0	0	0	0	0	0	0	0	0	0	0	0	0	0	0	0	0	0	0
Gov Eq 1 (6)	0	0	0	0	0	0	0	0	0	0	0.0202587	0.0130208	-0.0404686	0	0.0202587	-0.0130208	0	0	0	0	0	0	0	0	0	0	0	0	0	0	0	0	0	0	0	0	0	0	0	0	0	0	0	0	0	0	0	0	0
Gov Eq 2 (6)	0	0	0	0	0	0	0	0	0	0	-0.0130208	1	0	-2.02478	0.0130208	1	0	0	0	0	0	0	0	0	0	0	0	0	0	0	0	0	0	0	0	0	0	0	0	0	0	0	0	0	0	0	0	0	0
Gov Eq 1 (7)	0	0	0	0	0	0	0	0	0	0	0	0	0.0202587	0.0130208	-0.0404686	0	0.0202587	-0.0130208	0	0	0	0	0	0	0	0	0	0	0	0	0	0	0	0	0	0	0	0	0	0	0	0	0	0	0	0	0	0	0
Gov Eq 2 (7)	0	0	0	0	0	0	0	0	0	0	0	0	-0.0130208	1	0	-2.02478	0.0130208	1	0	0	0	0	0	0	0	0	0	0	0	0	0	0	0	0	0	0	0	0	0	0	0	0	0	0	0	0	0	0	0
Gov Eq 1 (8)	0	0	0	0	0	0	0	0	0	0	0	0	0	0	0.0202587	0.0130208	-0.0404686	0	0.0202587	-0.0130208	0	0	0	0	0	0	0	0	0	0	0	0	0	0	0	0	0	0	0	0	0	0	0	0	0	0	0	0	0
Gov Eq 2 (8)	0	0	0	0	0	0	0	0	0	0	0	0	0	0	-0.0130208	1	0	-2.02478	0.0130208	1	0	0	0	0	0	0	0	0	0	0	0	0	0	0	0	0	0	0	0	0	0	0	0	0	0	0	0	0	0
Gov Eq 1 (9)	0	0	0	0	0	0	0	0	0	0	0	0	0	0	0	0	0.0202587	0.0130208	-0.0404686	0	0.0202587	-0.0130208	0	0	0	0	0	0	0	0	0	0	0	0	0	0	0	0	0	0	0	0	0	0	0	0	0	0	0
Gov Eq 2 (9)	0	0	0	0	0	0	0	0	0	0	0	0	0	0	0	0	-0.0130208	1	0	-2.02478	0.0130208	1	0	0	0	0	0	0	0	0	0	0	0	0	0	0	0	0	0	0	0	0	0	0	0	0	0	0	0
Gov Eq 1 (10)	0	0	0	0	0	0	0	0	0	0	0	0	0	0	0	0	0	0	0.0202587	0.0130208	-0.0404686	0	0.0202587	-0.0130208	0	0	0	0	0	0	0	0	0	0	0	0	0	0	0	0	0	0	0	0	0	0	0	0	0
Gov Eq 2 (10)	0	0	0	0	0	0	0	0	0	0	0	0	0	0	0	0	0	0	-0.0130208	1	0	-2.02478	0.0130208	1	0	0	0	0	0	0	0	0	0	0	0	0	0	0	0	0	0	0	0	0	0	0	0	0	0
Gov Eq 1 (11)	0	0	0	0	0	0	0	0	0	0	0	0	0	0	0	0	0	0	0	0	0.0202587	0.0130208	-0.0404686	0	0.0202587	-0.0130208	0	0	0	0	0	0	0	0	0	0	0	0	0	0	0	0	0	0	0	0	0	0	0
Gov Eq 2 (11)	0	0	0	0	0	0	0	0	0	0	0	0	0	0	0	0	0	0	0	0	-0.0130208	1	0	-2.02478	0.0130208	1	0	0	0	0	0	0	0	0	0	0	0	0	0	0	0	0	0	0	0	0	0	0	0
Gov Eq 1 (12)	0	0	0	0	0	0	0	0	0	0	0	0	0	0	0	0	0	0	0	0	0	0	0.0202587	0.0130208	-0.0404686	0	0.0202587	-0.0130208	0	0	0	0	0	0	0	0	0	0	0	0	0	0	0	0	0	0	0	0	0
Gov Eq 2 (12)	0	0	0	0	0	0	0	0	0	0	0	0	0	0	0	0	0	0	0	0	0	0	-0.0130208	1	0	-2.02478	0.0130208	1	0	0	0	0	0	0	0	0	0	0	0	0	0	0	0	0	0	0	0	0	0
Gov Eq 1 (13)	0	0	0	0	0	0	0	0	0	0	0	0	0	0	0	0	0	0	0	0	0	0	0	0	0.0202587	0.0130208	-0.0404686	0	0.0202587	-0.0130208	0	0	0	0	0	0	0	0	0	0	0	0	0	0	0	0	0	0	0
Gov Eq 2 (13)	0	0	0	0	0	0	0	0	0	0	0	0	0	0	0	0	0	0	0	0	0	0	0	0	-0.0130208	1	0	-2.02478	0.0130208	1	0	0	0	0	0	0	0	0	0	0	0	0	0	0	0	0	0	0	0
Gov Eq 1 (14)	0	0	0	0	0	0	0	0	0	0	0	0	0	0	0	0	0	0	0	0	0	0	0	0	0	0	0.0202587	0.0130208	-0.0404686	0	0.0202587	-0.0130208	0	0	0	0	0	0	0	0	0	0	0	0	0	0	0	0	0
Gov Eq 2 (14)	0	0	0	0	0	0	0	0	0	0	0	0	0	0	0	0	0	0	0	0	0	0	0	0	0	0	-0.0130208	1	0	-2.02478	0.0130208	1	0	0	0	0	0	0	0	0	0	0	0	0	0	0	0	0	0
Gov Eq 1 (15)	0	0	0	0	0	0	0	0	0	0	0	0	0	0	0	0	0	0	0	0	0	0	0	0	0	0	0	0	0.0202587	0.0130208	-0.0404686	0	0.0202587	-0.0130208	0	0	0	0	0	0	0	0	0	0	0	0	0	0	0
Gov Eq 2 (15)	0	0	0	0	0	0	0	0	0	0	0	0	0	0	0	0	0	0	0	0	0	0	0	0	0	0	0	0	-0.0130208	1	0	-2.02478	0.0130208	1	0	0	0	0	0	0	0	0	0	0	0	0	0	0	0
Gov Eq 1 (16)	0	0	0	0	0	0	0	0	0	0	0	0	0	0	0	0	0	0	0	0	0	0	0	0	0	0	0	0	0	0	0.0202587	0.0130208	-0.0404686	0	0.0202587	-0.0130208	0	0	0	0	0	0	0	0	0	0	0	0	0
Gov Eq 2 (16)	0	0	0	0	0	0	0	0	0	0	0	0	0	0	0	0	0	0	0	0	0	0	0	0	0	0	0	0	0	0	-0.0130208	1	0	-2.02478	0.0130208	1	0	0	0	0	0	0	0	0	0	0	0	0	0
Gov Eq 1 (17)	0	0	0	0	0	0	0	0	0	0	0	0	0	0	0	0	0	0	0	0	0	0	0	0	0	0	0	0	0	0	0	0	0.0202587	0.0130208	-0.0404686	0	0.0202587	-0.0130208	0	0	0	0	0	0	0	0	0	0	0
Gov Eq 2 (17)	0	0	0	0	0	0	0	0	0	0	0	0	0	0	0	0	0	0	0	0	0	0	0	0	0	0	0	0	0	0	0	0	-0.0130208	1	0	-2.02478	0.0130208	1	0	0	0	0	0	0	0	0	0	0	0
Gov Eq 1 (18)	0	0	0	0	0	0	0	0	0	0	0	0	0	0	0	0	0	0	0	0	0	0	0	0	0	0	0	0	0	0	0	0	0	0	0.0202587	0.0130208	-0.0404686	0	0.0202587	-0.0130208	0	0	0	0	0	0	0	0	0
Gov Eq 2 (18)	0	0	0	0	0	0	0	0	0	0	0	0	0	0	0	0	0	0	0	0	0	0	0	0	0	0	0	0	0	0	0	0	0	0	-0.0130208	1	0	-2.02478	0.0130208	1	0	0	0	0	0	0	0	0	0
Gov Eq 1 (19)	0	0	0	0	0	0	0	0	0	0	0	0	0	0	0	0	0	0	0	0	0	0	0	0	0	0	0	0	0	0	0	0	0	0	0	0	0.0202587	0.0130208	-0.0404686	0	0.0202587	-0.0130208	0	0	0	0	0	0	0
Gov Eq 2 (19)	0	0	0	0	0	0	0	0	0	0	0	0	0	0	0	0	0	0	0	0	0	0	0	0	0	0	0	0	0	0	0	0	0	0	0	0	-0.0130208	1	0	-2.02478	0.0130208	1	0	0	0	0	0	0	0
Gov Eq 1 (20)	0	0	0	0	0	0	0	0	0	0	0	0	0	0	0	0	0	0	0	0	0	0	0	0	0	0	0	0	0	0	0	0	0	0	0	0	0	0	0.0202587	0.0130208	-0.0404686	0	0.0202587	-0.0130208	0	0	0	0	0
Gov Eq 2 (20)	0	0	0	0	0	0	0	0	0	0	0	0	0	0	0	0	0	0	0	0	0	0	0	0	0	0	0	0	0	0	0	0	0	0	0	0	0	0	-0.0130208	1	0	-2.02478	0.0130208	1	0	0	0	0	0
Gov Eq 1 (21)	0	0	0	0	0	0	0	0	0	0	0	0	0	0	0	0	0	0	0	0	0	0	0	0	0	0	0	0	0	0	0	0	0	0	0	0	0	0	0	0	0.0202587	0.0130208	-0.0404686	0	0.0202587	-0.0130208	0	0	0
Gov Eq 2 (21)	0	0	0	0	0	0	0	0	0	0	0	0	0	0	0	0	0	0	0	0	0	0	0	0	0	0	0	0	0	0	0	0	0	0	0	0	0	0	0	0	-0.0130208	1	0	-2.02478	0.0130208	1	0	0	0
Gov Eq 1 (22)	0	0	0	0	0	0	0	0	0	0	0	0	0	0	0	0	0	0	0	0	0	0	0	0	0	0	0	0	0	0	0	0	0	0	0	0	0	0	0	0	0	0	0.0202587	0.0130208	-0.0404686	0	0.0202587	-0.0130208	0
Gov Eq 2 (22)	0	0	0	0	0	0	0	0	0	0	0	0	0	0	0	0	0	0	0	0	0	0	0	0	0	0	0	0	0	0	0	0	0	0	0	0	0	0	0	0	0	0	-0.0130208	1	0	-2.02478	0.0130208	1	0
Gov Eq 1 (23)	0	0	0	0	0	0	0	0	0	0	0	0	0	0	0	0	0	0	0	0	0	0	0	0	0	0	0	0	0	0	0	0	0	0	0	0	0	0	0	0	0	0	0	0	0.0202587	0.0130208	-0.0404686	0	0.0202587
Gov Eq 2 (23)	0	0	0	0	0	0	0	0	0	0	0	0	0	0	0	0	0	0	0	0	0	0	0	0	0	0	0	0	0	0	0	0	0	0	0	0	0	0	0	0	0	0	0	0	-0.0130208	1	0	-2.02478	0.0130208
Gov Eq 1 (24)	0	0	0	0	0	0	0	0	0	0	0	0	0	0	0	0	0	0	0	0	0	0	0	0	0	0	0	0	0	0	0	0	0	0	0	0	0	0	0	0	0	0	0	0	0	0	0.0202587	0.0130208	-0.0404686
Gov Eq 2 (24)	0	0	0	0	0	0	0	0	0	0	0	0	0	0	0	0	0	0	0	0	0	0	0	0	0	0	0	0	0	0	0	0	0	0	0	0	0	0	0	0	0	0	0	0	0	0	-0.0130208	1	0
Gov Eq 1 (25)	0	0	0	0	0	0	0	0	0	0	0	0	0	0	0	0	0	0	0	0	0	0	0	0	0	0	0	0	0	0	0	0	0	0	0	0	0	0	0	0	0	0	0	0	0	0	0	0	0.0202587
Gov Eq 2 (25)	0	0	0	0	0	0	0	0	0	0	0	0	0	0	0	0	0	0	0	0	0	0	0	0	0	0	0	0	0	0	0	0	0	0	0	0	0	0	0	0	0	0	0	0	0	0	0	0	-0.0130208
Gov Eq 1 (26)	0	0	0	0	0	0	0	0	0	0	0	0	0	0	0	0	0	0	0	0	0	0	0	0	0	0	0	0	0	0	0	0	0	0	0	0	0	0	0	0	0	0	0	0	0	0	0	0	0
Gov Eq 2 (26)	0	0	0	0	0	0	0	0	0	0	0	0	0	0	0	0	0	0	0	0	0	0	0	0	0	0	0	0	0	0	0	0	0	0	0	0	0	0	0	0	0	0	0	0	0	0	0	0	0
Gov Eq 1 (27)	0	0	0	0	0	0	0	0	0	0	0	0	0	0	0	0	0	0	0	0	0	0	0	0	0	0	0	0	0	0	0	0	0	0	0	0	0	0	0	0	0	0	0	0	0	0	0	0	0
Gov Eq 2 (27)	0	0	0	0	0	0	0	0	0	0	0	0	0	0	0	0	0	0	0	0	0	0	0	0	0	0	0	0	0	0	0	0	0	0	0	0	0	0	0	0	0	0	0	0	0	0	0	0	0
Gov Eq 1 (28)	0	0	0	0	0	0	0	0	0	0	0	0	0	0	0	0	0	0	0	0	0	0	0	0	0	0	0	0	0	0	0	0	0	0	0	0	0	0	0	0	0	0	0	0	0	0	0	0	0
Gov Eq 2 (28)	0	0	0	0	0	0	0	0	0	0	0	0	0	0	0	0	0	0	0	0	0	0	0	0	0	0	0	0	0	0	0	0	0	0	0	0	0	0	0	0	0	0	0	0	0	0	0	0	0
Gov Eq 1 (29)	0	0	0	0	0	0	0	0	0	0	0	0	0	0	0	0	0	0	0	0	0	0	0	0	0	0	0	0	0	0	0	0	0	0	0	0	0	0	0	0	0	0	0	0	0	0	0	0	0
Gov Eq 2 (29)	0	0	0	0	0	0	0	0	0	0	0	0	0	0	0	0	0	0	0	0	0	0	0	0	0	0	0	0	0	0	0	0	0	0	0	0	0	0	0	0	0	0	0	0	0	0	0	0	0
Gov Eq 1 (30)	0	0	0	0	0	0	0	0	0	0	0	0	0	0	0	0	0	0	0	0	0	0	0	0	0	0	0	0	0	0	0	0	0	0	0	0	0	0	0	0	0	0	0	0	0	0	0	0	0
Gov Eq 2 (30)	0	0	0	0	0	0	0	0	0	0	0	0	0	0	0	0	0	0	0	0	0	0	0	0	0	0	0	0	0	0	0	0	0	0	0	0	0	0	0	0	0	0	0	0	0	0	0	0	0
Gov Eq 1 (31)	0	0	0	0	0	0	0	0	0	0	0	0	0	0	0	0	0	0	0	0	0	0	0	0	0	0	0	0	0	0	0	0	0	0	0	0	0	0	0	0	0	0	0	0	0	0	0	0	0
Gov Eq 2 (31)	0	0	0	0	0	0	0	0	0	0	0	0	0	0	0	0	0	0	0	0	0	0	0	0	0	0	0	0	0	0	0	0	0	0	0	0	0	0	0	0	0	0	0	0	0	0	0	0	0
Gov Eq 1 (32)	0	0	0	0	0	0	0	0	0	0	0	0	0	0	0	0	0	0	0	0	0	0	0	0	0	0	0	0	0	0	0	0	0	0	0	0	0	0	0	0	0	0	0	0	0	0	0	0	0
Gov Eq 2 (32)	0	0	0	0	0	0	0	0	0	0	0	0	0	0	0	0	0	0	0	0	0	0	0	0	0	0	0	0	0	0	0	0	0	0	0	0	0	0	0	0	0	0	0	0	0	0	0	0	0
Gov Eq 1 (33)	0	0	0	0	0	0	0	0	0	0	0	0	0	0	0	0	0	0	0	0	0	0	0	0	0	0	0	0	0	0	0	0	0	0	0	0	0	0	0	0	0	0	0	0	0	0	0	0	0
Gov Eq 2 (33)	0	0	0	0	0	0	0	0	0	0	0	0	0	0	0	0	0	0	0	0	0	0	0	0	0	0	0	0	0	0	0	0	0	0	0	0	0	0	0	0	0	0	0	0	0	0	0	0	0
BoCo 1 (1)	0	0	1	0	0	0	0	0	0	0	0	0	0	0	0	0	0	0	0	0	0	0	0	0	0	0	0	0	0	0	0	0	0	0	0	0	0	0	0	0	0	0	0	0	0	0	0	0	0
BoCo 2 (1)	0	0	0	1	0	0	0	0	0	0	0	0	0	0	0	0	0	0	0	0	0	0	0	0	0	0	0	0	0	0	0	0	0	0	0	0	0	0	0	0	0	0	0	0	0	0	0	0	0
BoCo 1 (33)	0	0	0	0	0	0	0	0	0	0	0	0	0	0	0	0	0	0	0	0	0	0	0	0	0	0	0	0	0	0	0	0	0	0	0	0	0	0	0	0	0	0	0	0	0	0	0	0	0
BoCo 2 (33)	0	0	0	0	0	0	0	0	0	0	0	0	0	0	0	0	0	0	0	0	0	0	0	0	0	0	0	0	0	0	0	0	0	0	0	0	0	0	0	0	0	0	0	0	0	0	0	0	0
[truncated: 21 more columns]

## Sheet: M-W FDM approx
		Free vibration of a fixed-pinned Timoshenko beam
		resting on Winkler foundation and subjected to a compressive force
			M-W FDM approximation
			Nine-point grid
			blk =	0.125
						The governing equation
			a = EI/kGAl²=	0.0375
			kRI =	0.01			-1.98043
		Coefficient of axial force		-5.92176
							-0.196611
	Winkler foundation			77.9273			5.75303
							2.4
				-0.0925275
						Determinant =	0.000771005
				11.1919
	W0	h²M0	W1	h²M1	W2	h²M2	W3	h²M3	W4	h²M4	W5	h²M5	W6	h²M6	W7	h²M7	W8	h²M8	W9	h²M9	W10	h²M10
Gov Eq 1 (1)	-0.0925275	1	0.196611	-1.98043	-0.0925275	1	0	0	0	0	0	0	0	0	0	0	0	0	0	0	0	0
Gov Eq 2 (1)	1	-2.4	-2	5.75303	1	-2.4	0	0	0	0	0	0	0	0	0	0	0	0	0	0	0	0
Gov Eq 1 (2)	0	0	-0.0925275	1	0.196611	-1.98043	-0.0925275	1	0	0	0	0	0	0	0	0	0	0	0	0	0	0
Gov Eq 2 (2)	0	0	1	-2.4	-2	5.75303	1	-2.4	0	0	0	0	0	0	0	0	0	0	0	0	0	0
Gov Eq 1 (3)	0	0	0	0	-0.0925275	1	0.196611	-1.98043	-0.0925275	1	0	0	0	0	0	0	0	0	0	0	0	0
Gov Eq 2 (3)	0	0	0	0	1	-2.4	-2	5.75303	1	-2.4	0	0	0	0	0	0	0	0	0	0	0	0
Gov Eq 1 (4)	0	0	0	0	0	0	-0.0925275	1	0.196611	-1.98043	-0.0925275	1	0	0	0	0	0	0	0	0	0	0
Gov Eq 2 (4)	0	0	0	0	0	0	1	-2.4	-2	5.75303	1	-2.4	0	0	0	0	0	0	0	0	0	0
Gov Eq 1 (5)	0	0	0	0	0	0	0	0	-0.0925275	1	0.196611	-1.98043	-0.0925275	1	0	0	0	0	0	0	0	0
Gov Eq 2 (5)	0	0	0	0	0	0	0	0	1	-2.4	-2	5.75303	1	-2.4	0	0	0	0	0	0	0	0
Gov Eq 1 (6)	0	0	0	0	0	0	0	0	0	0	-0.0925275	1	0.196611	-1.98043	-0.0925275	1	0	0	0	0	0	0
Gov Eq 2 (6)	0	0	0	0	0	0	0	0	0	0	1	-2.4	-2	5.75303	1	-2.4	0	0	0	0	0	0
Gov Eq 1 (7)	0	0	0	0	0	0	0	0	0	0	0	0	-0.0925275	1	0.196611	-1.98043	-0.0925275	1	0	0	0	0
Gov Eq 2 (7)	0	0	0	0	0	0	0	0	0	0	0	0	1	-2.4	-2	5.75303	1	-2.4	0	0	0	0
Gov Eq 1 (8)	0	0	0	0	0	0	0	0	0	0	0	0	0	0	-0.0925275	1	0.196611	-1.98043	-0.0925275	1	0	0
Gov Eq 2 (8)	0	0	0	0	0	0	0	0	0	0	0	0	0	0	1	-2.4	-2	5.75303	1	-2.4	0	0
Gov Eq 1 (9)	0	0	0	0	0	0	0	0	0	0	0	0	0	0	0	0	-0.0925275	1	0.196611	-1.98043	-0.0925275	1
Gov Eq 2 (9)	0	0	0	0	0	0	0	0	0	0	0	0	0	0	0	0	1	-2.4	-2	5.75303	1	-2.4
Bo Co 1 (1)	0	0	1	0	0	0	0	0	0	0	0	0	0	0	0	0	0	0	0	0	0	0
Bo Co 2 (1)	0.416667	-1	0	0	-0.416667	1	0	0	0	0	0	0	0	0	0	0	0	0	0	0	0	0
Bo Co 1 (9)	0	0	0	0	0	0	0	0	0	0	0	0	0	0	0	0	0	0	1	0	0	0
Bo Co 2 (9)	0	0	0	0	0	0	0	0	0	0	0	0	0	0	0	0	0	0	0	1	0	0
		M-W FDM approximation
		Seventeen-point grid
			blk =	0.0625
						The governing equation
			a = EI/kGAl²=	0.0375
			kRI =	0.01			-1.99501
		Coefficient of axial force		-5.92176
							-0.0470235
	Winkler foundation			77.9273			20.1521
							9.6
				-0.0231319
						Determinant =	0.000166871
				11.3013
	W0	h²M0	W1	h²M1	W2	h²M2	W3	h²M3	W4	h²M4	W5	h²M5	W6	h²M6	W7	h²M7	W8	h²M8	W9	h²M9	W10	h²M10	W11	h²M11	W12	h²M12	W13	h²M13	W14	h²M14	W15	h²M15	W16	h²M16	W17	h²M17	W18	h²M18
Gov Eq 1 (1)	-0.0231319	1	0.0470235	-1.99501	-0.0231319	1	0	0	0	0	0	0	0	0	0	0	0	0	0	0	0	0	0	0	0	0	0	0	0	0	0	0	0	0	0	0	0	0
Gov Eq 2 (1)	1	-9.6	-2	20.1521	1	-9.6	0	0	0	0	0	0	0	0	0	0	0	0	0	0	0	0	0	0	0	0	0	0	0	0	0	0	0	0	0	0	0	0
Gov Eq 1 (2)	0	0	-0.0231319	1	0.0470235	-1.99501	-0.0231319	1	0	0	0	0	0	0	0	0	0	0	0	0	0	0	0	0	0	0	0	0	0	0	0	0	0	0	0	0	0	0
Gov Eq 2 (2)	0	0	1	-9.6	-2	20.1521	1	-9.6	0	0	0	0	0	0	0	0	0	0	0	0	0	0	0	0	0	0	0	0	0	0	0	0	0	0	0	0	0	0
Gov Eq 1 (3)	0	0	0	0	-0.0231319	1	0.0470235	-1.99501	-0.0231319	1	0	0	0	0	0	0	0	0	0	0	0	0	0	0	0	0	0	0	0	0	0	0	0	0	0	0	0	0
Gov Eq 2 (3)	0	0	0	0	1	-9.6	-2	20.1521	1	-9.6	0	0	0	0	0	0	0	0	0	0	0	0	0	0	0	0	0	0	0	0	0	0	0	0	0	0	0	0
Gov Eq 1 (4)	0	0	0	0	0	0	-0.0231319	1	0.0470235	-1.99501	-0.0231319	1	0	0	0	0	0	0	0	0	0	0	0	0	0	0	0	0	0	0	0	0	0	0	0	0	0	0
Gov Eq 2 (4)	0	0	0	0	0	0	1	-9.6	-2	20.1521	1	-9.6	0	0	0	0	0	0	0	0	0	0	0	0	0	0	0	0	0	0	0	0	0	0	0	0	0	0
Gov Eq 1 (5)	0	0	0	0	0	0	0	0	-0.0231319	1	0.0470235	-1.99501	-0.0231319	1	0	0	0	0	0	0	0	0	0	0	0	0	0	0	0	0	0	0	0	0	0	0	0	0
Gov Eq 2 (5)	0	0	0	0	0	0	0	0	1	-9.6	-2	20.1521	1	-9.6	0	0	0	0	0	0	0	0	0	0	0	0	0	0	0	0	0	0	0	0	0	0	0	0
Gov Eq 1 (6)	0	0	0	0	0	0	0	0	0	0	-0.0231319	1	0.0470235	-1.99501	-0.0231319	1	0	0	0	0	0	0	0	0	0	0	0	0	0	0	0	0	0	0	0	0	0	0
Gov Eq 2 (6)	0	0	0	0	0	0	0	0	0	0	1	-9.6	-2	20.1521	1	-9.6	0	0	0	0	0	0	0	0	0	0	0	0	0	0	0	0	0	0	0	0	0	0
Gov Eq 1 (7)	0	0	0	0	0	0	0	0	0	0	0	0	-0.0231319	1	0.0470235	-1.99501	-0.0231319	1	0	0	0	0	0	0	0	0	0	0	0	0	0	0	0	0	0	0	0	0
Gov Eq 2 (7)	0	0	0	0	0	0	0	0	0	0	0	0	1	-9.6	-2	20.1521	1	-9.6	0	0	0	0	0	0	0	0	0	0	0	0	0	0	0	0	0	0	0	0
Gov Eq 1 (8)	0	0	0	0	0	0	0	0	0	0	0	0	0	0	-0.0231319	1	0.0470235	-1.99501	-0.0231319	1	0	0	0	0	0	0	0	0	0	0	0	0	0	0	0	0	0	0
Gov Eq 2 (8)	0	0	0	0	0	0	0	0	0	0	0	0	0	0	1	-9.6	-2	20.1521	1	-9.6	0	0	0	0	0	0	0	0	0	0	0	0	0	0	0	0	0	0
Gov Eq 1 (9)	0	0	0	0	0	0	0	0	0	0	0	0	0	0	0	0	-0.0231319	1	0.0470235	-1.99501	-0.0231319	1	0	0	0	0	0	0	0	0	0	0	0	0	0	0	0	0
Gov Eq 2 (9)	0	0	0	0	0	0	0	0	0	0	0	0	0	0	0	0	1	-9.6	-2	20.1521	1	-9.6	0	0	0	0	0	0	0	0	0	0	0	0	0	0	0	0
Gov Eq 1 (10)	0	0	0	0	0	0	0	0	0	0	0	0	0	0	0	0	0	0	-0.0231319	1	0.0470235	-1.99501	-0.0231319	1	0	0	0	0	0	0	0	0	0	0	0	0	0	0
Gov Eq 2 (10)	0	0	0	0	0	0	0	0	0	0	0	0	0	0	0	0	0	0	1	-9.6	-2	20.1521	1	-9.6	0	0	0	0	0	0	0	0	0	0	0	0	0	0
Gov Eq 1 (11)	0	0	0	0	0	0	0	0	0	0	0	0	0	0	0	0	0	0	0	0	-0.0231319	1	0.0470235	-1.99501	-0.0231319	1	0	0	0	0	0	0	0	0	0	0	0	0
Gov Eq 2 (11)	0	0	0	0	0	0	0	0	0	0	0	0	0	0	0	0	0	0	0	0	1	-9.6	-2	20.1521	1	-9.6	0	0	0	0	0	0	0	0	0	0	0	0
Gov Eq 1 (12)	0	0	0	0	0	0	0	0	0	0	0	0	0	0	0	0	0	0	0	0	0	0	-0.0231319	1	0.0470235	-1.99501	-0.0231319	1	0	0	0	0	0	0	0	0	0	0
Gov Eq 2 (12)	0	0	0	0	0	0	0	0	0	0	0	0	0	0	0	0	0	0	0	0	0	0	1	-9.6	-2	20.1521	1	-9.6	0	0	0	0	0	0	0	0	0	0
Gov Eq 1 (13)	0	0	0	0	0	0	0	0	0	0	0	0	0	0	0	0	0	0	0	0	0	0	0	0	-0.0231319	1	0.0470235	-1.99501	-0.0231319	1	0	0	0	0	0	0	0	0
Gov Eq 2 (13)	0	0	0	0	0	0	0	0	0	0	0	0	0	0	0	0	0	0	0	0	0	0	0	0	1	-9.6	-2	20.1521	1	-9.6	0	0	0	0	0	0	0	0
Gov Eq 1 (14)	0	0	0	0	0	0	0	0	0	0	0	0	0	0	0	0	0	0	0	0	0	0	0	0	0	0	-0.0231319	1	0.0470235	-1.99501	-0.0231319	1	0	0	0	0	0	0
Gov Eq 2 (14)	0	0	0	0	0	0	0	0	0	0	0	0	0	0	0	0	0	0	0	0	0	0	0	0	0	0	1	-9.6	-2	20.1521	1	-9.6	0	0	0	0	0	0
Gov Eq 1 (15)	0	0	0	0	0	0	0	0	0	0	0	0	0	0	0	0	0	0	0	0	0	0	0	0	0	0	0	0	-0.0231319	1	0.0470235	-1.99501	-0.0231319	1	0	0	0	0
Gov Eq 2 (15)	0	0	0	0	0	0	0	0	0	0	0	0	0	0	0	0	0	0	0	0	0	0	0	0	0	0	0	0	1	-9.6	-2	20.1521	1	-9.6	0	0	0	0
Gov Eq 1 (16)	0	0	0	0	0	0	0	0	0	0	0	0	0	0	0	0	0	0	0	0	0	0	0	0	0	0	0	0	0	0	-0.0231319	1	0.0470235	-1.99501	-0.0231319	1	0	0
Gov Eq 2 (16)	0	0	0	0	0	0	0	0	0	0	0	0	0	0	0	0	0	0	0	0	0	0	0	0	0	0	0	0	0	0	1	-9.6	-2	20.1521	1	-9.6	0	0
Gov Eq 1 (17)	0	0	0	0	0	0	0	0	0	0	0	0	0	0	0	0	0	0	0	0	0	0	0	0	0	0	0	0	0	0	0	0	-0.0231319	1	0.0470235	-1.99501	-0.0231319	1
Gov Eq 2 (17)	0	0	0	0	0	0	0	0	0	0	0	0	0	0	0	0	0	0	0	0	0	0	0	0	0	0	0	0	0	0	0	0	1	-9.6	-2	20.1521	1	-9.6
Bo Co 1 (1)	0	0	1	0	0	0	0	0	0	0	0	0	0	0	0	0	0	0	0	0	0	0	0	0	0	0	0	0	0	0	0	0	0	0	0	0	0	0
Bo Co 2 (1)	0.104167	-1	0	0	-0.104167	1	0	0	0	0	0	0	0	0	0	0	0	0	0	0	0	0	0	0	0	0	0	0	0	0	0	0	0	0	0	0	0	0
Bo Co 1 (17)	0	0	0	0	0	0	0	0	0	0	0	0	0	0	0	0	0	0	0	0	0	0	0	0	0	0	0	0	0	0	0	0	0	0	1	0	0	0
Bo Co 2 (17)	0	0	0	0	0	0	0	0	0	0	0	0	0	0	0	0	0	0	0	0	0	0	0	0	0	0	0	0	0	0	0	0	0	0	0	1	0	0
		M-W FDM approximation
		Twenty five-point grid
			blk =	0.0416667
						The governing equation
			a = EI/kGAl²=	0.0375
			kRI =	0.01			-1.99777
		Coefficient of axial force		-5.92176
							-0.0207132
	Winkler foundation			77.9273			44.1519
							21.6
				-0.0102808
						Determinant =	3.21773e-05
				11.3219
	W0	h²M0	W1	h²M1	W2	h²M2	W3	h²M3	W4	h²M4	W5	h²M5	W6	h²M6	W7	h²M7	W8	h²M8	W9	h²M9	W10	h²M10	W11	h²M11	W12	h²M12	W13	h²M13	W14	h²M14	W15	h²M15	W16	h²M16	W17	h²M17	W18	h²M18	W19	h²M19	W20	h²M20	W21	h²M21	W22	h²M22	W23	h²M23	W24
Gov Eq 1 (1)	-0.0102808	1	0.0207132	-1.99777	-0.0102808	1	0	0	0	0	0	0	0	0	0	0	0	0	0	0	0	0	0	0	0	0	0	0	0	0	0	0	0	0	0	0	0	0	0	0	0	0	0	0	0	0	0	0	0
Gov Eq 2 (1)	1	-21.6	-2	44.1519	1	-21.6	0	0	0	0	0	0	0	0	0	0	0	0	0	0	0	0	0	0	0	0	0	0	0	0	0	0	0	0	0	0	0	0	0	0	0	0	0	0	0	0	0	0	0
Gov Eq 1 (2)	0	0	-0.0102808	1	0.0207132	-1.99777	-0.0102808	1	0	0	0	0	0	0	0	0	0	0	0	0	0	0	0	0	0	0	0	0	0	0	0	0	0	0	0	0	0	0	0	0	0	0	0	0	0	0	0	0	0
Gov Eq 2 (2)	0	0	1	-21.6	-2	44.1519	1	-21.6	0	0	0	0	0	0	0	0	0	0	0	0	0	0	0	0	0	0	0	0	0	0	0	0	0	0	0	0	0	0	0	0	0	0	0	0	0	0	0	0	0
Gov Eq 1 (3)	0	0	0	0	-0.0102808	1	0.0207132	-1.99777	-0.0102808	1	0	0	0	0	0	0	0	0	0	0	0	0	0	0	0	0	0	0	0	0	0	0	0	0	0	0	0	0	0	0	0	0	0	0	0	0	0	0	0
Gov Eq 2 (3)	0	0	0	0	1	-21.6	-2	44.1519	1	-21.6	0	0	0	0	0	0	0	0	0	0	0	0	0	0	0	0	0	0	0	0	0	0	0	0	0	0	0	0	0	0	0	0	0	0	0	0	0	0	0
Gov Eq 1 (4)	0	0	0	0	0	0	-0.0102808	1	0.0207132	-1.99777	-0.0102808	1	0	0	0	0	0	0	0	0	0	0	0	0	0	0	0	0	0	0	0	0	0	0	0	0	0	0	0	0	0	0	0	0	0	0	0	0	0
Gov Eq 2 (4)	0	0	0	0	0	0	1	-21.6	-2	44.1519	1	-21.6	0	0	0	0	0	0	0	0	0	0	0	0	0	0	0	0	0	0	0	0	0	0	0	0	0	0	0	0	0	0	0	0	0	0	0	0	0
Gov Eq 1 (5)	0	0	0	0	0	0	0	0	-0.0102808	1	0.0207132	-1.99777	-0.0102808	1	0	0	0	0	0	0	0	0	0	0	0	0	0	0	0	0	0	0	0	0	0	0	0	0	0	0	0	0	0	0	0	0	0	0	0
Gov Eq 2 (5)	0	0	0	0	0	0	0	0	1	-21.6	-2	44.1519	1	-21.6	0	0	0	0	0	0	0	0	0	0	0	0	0	0	0	0	0	0	0	0	0	0	0	0	0	0	0	0	0	0	0	0	0	0	0
Gov Eq 1 (6)	0	0	0	0	0	0	0	0	0	0	-0.0102808	1	0.0207132	-1.99777	-0.0102808	1	0	0	0	0	0	0	0	0	0	0	0	0	0	0	0	0	0	0	0	0	0	0	0	0	0	0	0	0	0	0	0	0	0
Gov Eq 2 (6)	0	0	0	0	0	0	0	0	0	0	1	-21.6	-2	44.1519	1	-21.6	0	0	0	0	0	0	0	0	0	0	0	0	0	0	0	0	0	0	0	0	0	0	0	0	0	0	0	0	0	0	0	0	0
Gov Eq 1 (7)	0	0	0	0	0	0	0	0	0	0	0	0	-0.0102808	1	0.0207132	-1.99777	-0.0102808	1	0	0	0	0	0	0	0	0	0	0	0	0	0	0	0	0	0	0	0	0	0	0	0	0	0	0	0	0	0	0	0
Gov Eq 2 (7)	0	0	0	0	0	0	0	0	0	0	0	0	1	-21.6	-2	44.1519	1	-21.6	0	0	0	0	0	0	0	0	0	0	0	0	0	0	0	0	0	0	0	0	0	0	0	0	0	0	0	0	0	0	0
Gov Eq 1 (8)	0	0	0	0	0	0	0	0	0	0	0	0	0	0	-0.0102808	1	0.0207132	-1.99777	-0.0102808	1	0	0	0	0	0	0	0	0	0	0	0	0	0	0	0	0	0	0	0	0	0	0	0	0	0	0	0	0	0
Gov Eq 2 (8)	0	0	0	0	0	0	0	0	0	0	0	0	0	0	1	-21.6	-2	44.1519	1	-21.6	0	0	0	0	0	0	0	0	0	0	0	0	0	0	0	0	0	0	0	0	0	0	0	0	0	0	0	0	0
Gov Eq 1 (9)	0	0	0	0	0	0	0	0	0	0	0	0	0	0	0	0	-0.0102808	1	0.0207132	-1.99777	-0.0102808	1	0	0	0	0	0	0	0	0	0	0	0	0	0	0	0	0	0	0	0	0	0	0	0	0	0	0	0
Gov Eq 2 (9)	0	0	0	0	0	0	0	0	0	0	0	0	0	0	0	0	1	-21.6	-2	44.1519	1	-21.6	0	0	0	0	0	0	0	0	0	0	0	0	0	0	0	0	0	0	0	0	0	0	0	0	0	0	0
Gov Eq 1 (10)	0	0	0	0	0	0	0	0	0	0	0	0	0	0	0	0	0	0	-0.0102808	1	0.0207132	-1.99777	-0.0102808	1	0	0	0	0	0	0	0	0	0	0	0	0	0	0	0	0	0	0	0	0	0	0	0	0	0
Gov Eq 2 (10)	0	0	0	0	0	0	0	0	0	0	0	0	0	0	0	0	0	0	1	-21.6	-2	44.1519	1	-21.6	0	0	0	0	0	0	0	0	0	0	0	0	0	0	0	0	0	0	0	0	0	0	0	0	0
Gov Eq 1 (11)	0	0	0	0	0	0	0	0	0	0	0	0	0	0	0	0	0	0	0	0	-0.0102808	1	0.0207132	-1.99777	-0.0102808	1	0	0	0	0	0	0	0	0	0	0	0	0	0	0	0	0	0	0	0	0	0	0	0
Gov Eq 2 (11)	0	0	0	0	0	0	0	0	0	0	0	0	0	0	0	0	0	0	0	0	1	-21.6	-2	44.1519	1	-21.6	0	0	0	0	0	0	0	0	0	0	0	0	0	0	0	0	0	0	0	0	0	0	0
Gov Eq 1 (12)	0	0	0	0	0	0	0	0	0	0	0	0	0	0	0	0	0	0	0	0	0	0	-0.0102808	1	0.0207132	-1.99777	-0.0102808	1	0	0	0	0	0	0	0	0	0	0	0	0	0	0	0	0	0	0	0	0	0
Gov Eq 2 (12)	0	0	0	0	0	0	0	0	0	0	0	0	0	0	0	0	0	0	0	0	0	0	1	-21.6	-2	44.1519	1	-21.6	0	0	0	0	0	0	0	0	0	0	0	0	0	0	0	0	0	0	0	0	0
Gov Eq 1 (13)	0	0	0	0	0	0	0	0	0	0	0	0	0	0	0	0	0	0	0	0	0	0	0	0	-0.0102808	1	0.0207132	-1.99777	-0.0102808	1	0	0	0	0	0	0	0	0	0	0	0	0	0	0	0	0	0	0	0
Gov Eq 2 (13)	0	0	0	0	0	0	0	0	0	0	0	0	0	0	0	0	0	0	0	0	0	0	0	0	1	-21.6	-2	44.1519	1	-21.6	0	0	0	0	0	0	0	0	0	0	0	0	0	0	0	0	0	0	0
Gov Eq 1 (14)	0	0	0	0	0	0	0	0	0	0	0	0	0	0	0	0	0	0	0	0	0	0	0	0	0	0	-0.0102808	1	0.0207132	-1.99777	-0.0102808	1	0	0	0	0	0	0	0	0	0	0	0	0	0	0	0	0	0
Gov Eq 2 (14)	0	0	0	0	0	0	0	0	0	0	0	0	0	0	0	0	0	0	0	0	0	0	0	0	0	0	1	-21.6	-2	44.1519	1	-21.6	0	0	0	0	0	0	0	0	0	0	0	0	0	0	0	0	0
Gov Eq 1 (15)	0	0	0	0	0	0	0	0	0	0	0	0	0	0	0	0	0	0	0	0	0	0	0	0	0	0	0	0	-0.0102808	1	0.0207132	-1.99777	-0.0102808	1	0	0	0	0	0	0	0	0	0	0	0	0	0	0	0
Gov Eq 2 (15)	0	0	0	0	0	0	0	0	0	0	0	0	0	0	0	0	0	0	0	0	0	0	0	0	0	0	0	0	1	-21.6	-2	44.1519	1	-21.6	0	0	0	0	0	0	0	0	0	0	0	0	0	0	0
Gov Eq 1 (16)	0	0	0	0	0	0	0	0	0	0	0	0	0	0	0	0	0	0	0	0	0	0	0	0	0	0	0	0	0	0	-0.0102808	1	0.0207132	-1.99777	-0.0102808	1	0	0	0	0	0	0	0	0	0	0	0	0	0
Gov Eq 2 (16)	0	0	0	0	0	0	0	0	0	0	0	0	0	0	0	0	0	0	0	0	0	0	0	0	0	0	0	0	0	0	1	-21.6	-2	44.1519	1	-21.6	0	0	0	0	0	0	0	0	0	0	0	0	0
Gov Eq 1 (17)	0	0	0	0	0	0	0	0	0	0	0	0	0	0	0	0	0	0	0	0	0	0	0	0	0	0	0	0	0	0	0	0	-0.0102808	1	0.0207132	-1.99777	-0.0102808	1	0	0	0	0	0	0	0	0	0	0	0
Gov Eq 2 (17)	0	0	0	0	0	0	0	0	0	0	0	0	0	0	0	0	0	0	0	0	0	0	0	0	0	0	0	0	0	0	0	0	1	-21.6	-2	44.1519	1	-21.6	0	0	0	0	0	0	0	0	0	0	0
Gov Eq 1 (18)	0	0	0	0	0	0	0	0	0	0	0	0	0	0	0	0	0	0	0	0	0	0	0	0	0	0	0	0	0	0	0	0	0	0	-0.0102808	1	0.0207132	-1.99777	-0.0102808	1	0	0	0	0	0	0	0	0	0
Gov Eq 2 (18)	0	0	0	0	0	0	0	0	0	0	0	0	0	0	0	0	0	0	0	0	0	0	0	0	0	0	0	0	0	0	0	0	0	0	1	-21.6	-2	44.1519	1	-21.6	0	0	0	0	0	0	0	0	0
Gov Eq 1 (19)	0	0	0	0	0	0	0	0	0	0	0	0	0	0	0	0	0	0	0	0	0	0	0	0	0	0	0	0	0	0	0	0	0	0	0	0	-0.0102808	1	0.0207132	-1.99777	-0.0102808	1	0	0	0	0	0	0	0
Gov Eq 2 (19)	0	0	0	0	0	0	0	0	0	0	0	0	0	0	0	0	0	0	0	0	0	0	0	0	0	0	0	0	0	0	0	0	0	0	0	0	1	-21.6	-2	44.1519	1	-21.6	0	0	0	0	0	0	0
Gov Eq 1 (20)	0	0	0	0	0	0	0	0	0	0	0	0	0	0	0	0	0	0	0	0	0	0	0	0	0	0	0	0	0	0	0	0	0	0	0	0	0	0	-0.0102808	1	0.0207132	-1.99777	-0.0102808	1	0	0	0	0	0
Gov Eq 2 (20)	0	0	0	0	0	0	0	0	0	0	0	0	0	0	0	0	0	0	0	0	0	0	0	0	0	0	0	0	0	0	0	0	0	0	0	0	0	0	1	-21.6	-2	44.1519	1	-21.6	0	0	0	0	0
Gov Eq 1 (21)	0	0	0	0	0	0	0	0	0	0	0	0	0	0	0	0	0	0	0	0	0	0	0	0	0	0	0	0	0	0	0	0	0	0	0	0	0	0	0	0	-0.0102808	1	0.0207132	-1.99777	-0.0102808	1	0	0	0
Gov Eq 2 (21)	0	0	0	0	0	0	0	0	0	0	0	0	0	0	0	0	0	0	0	0	0	0	0	0	0	0	0	0	0	0	0	0	0	0	0	0	0	0	0	0	1	-21.6	-2	44.1519	1	-21.6	0	0	0
Gov Eq 1 (22)	0	0	0	0	0	0	0	0	0	0	0	0	0	0	0	0	0	0	0	0	0	0	0	0	0	0	0	0	0	0	0	0	0	0	0	0	0	0	0	0	0	0	-0.0102808	1	0.0207132	-1.99777	-0.0102808	1	0
Gov Eq 2 (22)	0	0	0	0	0	0	0	0	0	0	0	0	0	0	0	0	0	0	0	0	0	0	0	0	0	0	0	0	0	0	0	0	0	0	0	0	0	0	0	0	0	0	1	-21.6	-2	44.1519	1	-21.6	0
Gov Eq 1 (23)	0	0	0	0	0	0	0	0	0	0	0	0	0	0	0	0	0	0	0	0	0	0	0	0	0	0	0	0	0	0	0	0	0	0	0	0	0	0	0	0	0	0	0	0	-0.0102808	1	0.0207132	-1.99777	-0.0102808
Gov Eq 2 (23)	0	0	0	0	0	0	0	0	0	0	0	0	0	0	0	0	0	0	0	0	0	0	0	0	0	0	0	0	0	0	0	0	0	0	0	0	0	0	0	0	0	0	0	0	1	-21.6	-2	44.1519	1
Gov Eq 1 (24)	0	0	0	0	0	0	0	0	0	0	0	0	0	0	0	0	0	0	0	0	0	0	0	0	0	0	0	0	0	0	0	0	0	0	0	0	0	0	0	0	0	0	0	0	0	0	-0.0102808	1	0.0207132
Gov Eq 2 (24)	0	0	0	0	0	0	0	0	0	0	0	0	0	0	0	0	0	0	0	0	0	0	0	0	0	0	0	0	0	0	0	0	0	0	0	0	0	0	0	0	0	0	0	0	0	0	1	-21.6	-2
Gov Eq 1 (25)	0	0	0	0	0	0	0	0	0	0	0	0	0	0	0	0	0	0	0	0	0	0	0	0	0	0	0	0	0	0	0	0	0	0	0	0	0	0	0	0	0	0	0	0	0	0	0	0	-0.0102808
Gov Eq 2 (25)	0	0	0	0	0	0	0	0	0	0	0	0	0	0	0	0	0	0	0	0	0	0	0	0	0	0	0	0	0	0	0	0	0	0	0	0	0	0	0	0	0	0	0	0	0	0	0	0	1
Bo Co 1 (1)	0	0	1	0	0	0	0	0	0	0	0	0	0	0	0	0	0	0	0	0	0	0	0	0	0	0	0	0	0	0	0	0	0	0	0	0	0	0	0	0	0	0	0	0	0	0	0	0	0
Bo Co 2 (1)	0.0462963	-1	0	0	-0.0462963	1	0	0	0	0	0	0	0	0	0	0	0	0	0	0	0	0	0	0	0	0	0	0	0	0	0	0	0	0	0	0	0	0	0	0	0	0	0	0	0	0	0	0	0
Bo Co 1 (25)	0	0	0	0	0	0	0	0	0	0	0	0	0	0	0	0	0	0	0	0	0	0	0	0	0	0	0	0	0	0	0	0	0	0	0	0	0	0	0	0	0	0	0	0	0	0	0	0	0
Bo Co 2 (25)	0	0	0	0	0	0	0	0	0	0	0	0	0	0	0	0	0	0	0	0	0	0	0	0	0	0	0	0	0	0	0	0	0	0	0	0	0	0	0	0	0	0	0	0	0	0	0	0	0
		M-W FDM approximation
		Thirty three-point grid
			blk =	0.03125
						The governing equation
			a = EI/kGAl²=	0.0375
			kRI =	0.01			-1.99875
		Coefficient of axial force		-5.92176
							-0.011614
	Winkler foundation			77.9273			77.7519
							38.4
				-0.00578297
						Determinant =	5.66831e-06
				11.3291
	W0	h²M0	W1	h²M1	W2	h²M2	W3	h²M3	W4	h²M4	W5	h²M5	W6	h²M6	W7	h²M7	W8	h²M8	W9	h²M9	W10	h²M10	W11	h²M11	W12	h²M12	W13	h²M13	W14	h²M14	W15	h²M15	W16	h²M16	W17	h²M17	W18	h²M18	W19	h²M19	W20	h²M20	W21	h²M21	W22	h²M22	W23	h²M23	W24
Gov Eq 1 (1)	-0.00578297	1	0.011614	-1.99875	-0.00578297	1	0	0	0	0	0	0	0	0	0	0	0	0	0	0	0	0	0	0	0	0	0	0	0	0	0	0	0	0	0	0	0	0	0	0	0	0	0	0	0	0	0	0	0
Gov Eq 2 (1)	1	-38.4	-2	77.7519	1	-38.4	0	0	0	0	0	0	0	0	0	0	0	0	0	0	0	0	0	0	0	0	0	0	0	0	0	0	0	0	0	0	0	0	0	0	0	0	0	0	0	0	0	0	0
Gov Eq 1 (2)	0	0	-0.00578297	1	0.011614	-1.99875	-0.00578297	1	0	0	0	0	0	0	0	0	0	0	0	0	0	0	0	0	0	0	0	0	0	0	0	0	0	0	0	0	0	0	0	0	0	0	0	0	0	0	0	0	0
Gov Eq 2 (2)	0	0	1	-38.4	-2	77.7519	1	-38.4	0	0	0	0	0	0	0	0	0	0	0	0	0	0	0	0	0	0	0	0	0	0	0	0	0	0	0	0	0	0	0	0	0	0	0	0	0	0	0	0	0
Gov Eq 1 (3)	0	0	0	0	-0.00578297	1	0.011614	-1.99875	-0.00578297	1	0	0	0	0	0	0	0	0	0	0	0	0	0	0	0	0	0	0	0	0	0	0	0	0	0	0	0	0	0	0	0	0	0	0	0	0	0	0	0
Gov Eq 2 (3)	0	0	0	0	1	-38.4	-2	77.7519	1	-38.4	0	0	0	0	0	0	0	0	0	0	0	0	0	0	0	0	0	0	0	0	0	0	0	0	0	0	0	0	0	0	0	0	0	0	0	0	0	0	0
Gov Eq 1 (4)	0	0	0	0	0	0	-0.00578297	1	0.011614	-1.99875	-0.00578297	1	0	0	0	0	0	0	0	0	0	0	0	0	0	0	0	0	0	0	0	0	0	0	0	0	0	0	0	0	0	0	0	0	0	0	0	0	0
Gov Eq 2 (4)	0	0	0	0	0	0	1	-38.4	-2	77.7519	1	-38.4	0	0	0	0	0	0	0	0	0	0	0	0	0	0	0	0	0	0	0	0	0	0	0	0	0	0	0	0	0	0	0	0	0	0	0	0	0
Gov Eq 1 (5)	0	0	0	0	0	0	0	0	-0.00578297	1	0.011614	-1.99875	-0.00578297	1	0	0	0	0	0	0	0	0	0	0	0	0	0	0	0	0	0	0	0	0	0	0	0	0	0	0	0	0	0	0	0	0	0	0	0
Gov Eq 2 (5)	0	0	0	0	0	0	0	0	1	-38.4	-2	77.7519	1	-38.4	0	0	0	0	0	0	0	0	0	0	0	0	0	0	0	0	0	0	0	0	0	0	0	0	0	0	0	0	0	0	0	0	0	0	0
Gov Eq 1 (6)	0	0	0	0	0	0	0	0	0	0	-0.00578297	1	0.011614	-1.99875	-0.00578297	1	0	0	0	0	0	0	0	0	0	0	0	0	0	0	0	0	0	0	0	0	0	0	0	0	0	0	0	0	0	0	0	0	0
Gov Eq 2 (6)	0	0	0	0	0	0	0	0	0	0	1	-38.4	-2	77.7519	1	-38.4	0	0	0	0	0	0	0	0	0	0	0	0	0	0	0	0	0	0	0	0	0	0	0	0	0	0	0	0	0	0	0	0	0
Gov Eq 1 (7)	0	0	0	0	0	0	0	0	0	0	0	0	-0.00578297	1	0.011614	-1.99875	-0.00578297	1	0	0	0	0	0	0	0	0	0	0	0	0	0	0	0	0	0	0	0	0	0	0	0	0	0	0	0	0	0	0	0
Gov Eq 2 (7)	0	0	0	0	0	0	0	0	0	0	0	0	1	-38.4	-2	77.7519	1	-38.4	0	0	0	0	0	0	0	0	0	0	0	0	0	0	0	0	0	0	0	0	0	0	0	0	0	0	0	0	0	0	0
Gov Eq 1 (8)	0	0	0	0	0	0	0	0	0	0	0	0	0	0	-0.00578297	1	0.011614	-1.99875	-0.00578297	1	0	0	0	0	0	0	0	0	0	0	0	0	0	0	0	0	0	0	0	0	0	0	0	0	0	0	0	0	0
Gov Eq 2 (8)	0	0	0	0	0	0	0	0	0	0	0	0	0	0	1	-38.4	-2	77.7519	1	-38.4	0	0	0	0	0	0	0	0	0	0	0	0	0	0	0	0	0	0	0	0	0	0	0	0	0	0	0	0	0
Gov Eq 1 (9)	0	0	0	0	0	0	0	0	0	0	0	0	0	0	0	0	-0.00578297	1	0.011614	-1.99875	-0.00578297	1	0	0	0	0	0	0	0	0	0	0	0	0	0	0	0	0	0	0	0	0	0	0	0	0	0	0	0
Gov Eq 2 (9)	0	0	0	0	0	0	0	0	0	0	0	0	0	0	0	0	1	-38.4	-2	77.7519	1	-38.4	0	0	0	0	0	0	0	0	0	0	0	0	0	0	0	0	0	0	0	0	0	0	0	0	0	0	0
Gov Eq 1 (10)	0	0	0	0	0	0	0	0	0	0	0	0	0	0	0	0	0	0	-0.00578297	1	0.011614	-1.99875	-0.00578297	1	0	0	0	0	0	0	0	0	0	0	0	0	0	0	0	0	0	0	0	0	0	0	0	0	0
Gov Eq 2 (10)	0	0	0	0	0	0	0	0	0	0	0	0	0	0	0	0	0	0	1	-38.4	-2	77.7519	1	-38.4	0	0	0	0	0	0	0	0	0	0	0	0	0	0	0	0	0	0	0	0	0	0	0	0	0
Gov Eq 1 (11)	0	0	0	0	0	0	0	0	0	0	0	0	0	0	0	0	0	0	0	0	-0.00578297	1	0.011614	-1.99875	-0.00578297	1	0	0	0	0	0	0	0	0	0	0	0	0	0	0	0	0	0	0	0	0	0	0	0
Gov Eq 2 (11)	0	0	0	0	0	0	0	0	0	0	0	0	0	0	0	0	0	0	0	0	1	-38.4	-2	77.7519	1	-38.4	0	0	0	0	0	0	0	0	0	0	0	0	0	0	0	0	0	0	0	0	0	0	0
Gov Eq 1 (12)	0	0	0	0	0	0	0	0	0	0	0	0	0	0	0	0	0	0	0	0	0	0	-0.00578297	1	0.011614	-1.99875	-0.00578297	1	0	0	0	0	0	0	0	0	0	0	0	0	0	0	0	0	0	0	0	0	0
Gov Eq 2 (12)	0	0	0	0	0	0	0	0	0	0	0	0	0	0	0	0	0	0	0	0	0	0	1	-38.4	-2	77.7519	1	-38.4	0	0	0	0	0	0	0	0	0	0	0	0	0	0	0	0	0	0	0	0	0
Gov Eq 1 (13)	0	0	0	0	0	0	0	0	0	0	0	0	0	0	0	0	0	0	0	0	0	0	0	0	-0.00578297	1	0.011614	-1.99875	-0.00578297	1	0	0	0	0	0	0	0	0	0	0	0	0	0	0	0	0	0	0	0
Gov Eq 2 (13)	0	0	0	0	0	0	0	0	0	0	0	0	0	0	0	0	0	0	0	0	0	0	0	0	1	-38.4	-2	77.7519	1	-38.4	0	0	0	0	0	0	0	0	0	0	0	0	0	0	0	0	0	0	0
Gov Eq 1 (14)	0	0	0	0	0	0	0	0	0	0	0	0	0	0	0	0	0	0	0	0	0	0	0	0	0	0	-0.00578297	1	0.011614	-1.99875	-0.00578297	1	0	0	0	0	0	0	0	0	0	0	0	0	0	0	0	0	0
Gov Eq 2 (14)	0	0	0	0	0	0	0	0	0	0	0	0	0	0	0	0	0	0	0	0	0	0	0	0	0	0	1	-38.4	-2	77.7519	1	-38.4	0	0	0	0	0	0	0	0	0	0	0	0	0	0	0	0	0
Gov Eq 1 (15)	0	0	0	0	0	0	0	0	0	0	0	0	0	0	0	0	0	0	0	0	0	0	0	0	0	0	0	0	-0.00578297	1	0.011614	-1.99875	-0.00578297	1	0	0	0	0	0	0	0	0	0	0	0	0	0	0	0
Gov Eq 2 (15)	0	0	0	0	0	0	0	0	0	0	0	0	0	0	0	0	0	0	0	0	0	0	0	0	0	0	0	0	1	-38.4	-2	77.7519	1	-38.4	0	0	0	0	0	0	0	0	0	0	0	0	0	0	0
Gov Eq 1 (16)	0	0	0	0	0	0	0	0	0	0	0	0	0	0	0	0	0	0	0	0	0	0	0	0	0	0	0	0	0	0	-0.00578297	1	0.011614	-1.99875	-0.00578297	1	0	0	0	0	0	0	0	0	0	0	0	0	0
Gov Eq 2 (16)	0	0	0	0	0	0	0	0	0	0	0	0	0	0	0	0	0	0	0	0	0	0	0	0	0	0	0	0	0	0	1	-38.4	-2	77.7519	1	-38.4	0	0	0	0	0	0	0	0	0	0	0	0	0
Gov Eq 1 (17)	0	0	0	0	0	0	0	0	0	0	0	0	0	0	0	0	0	0	0	0	0	0	0	0	0	0	0	0	0	0	0	0	-0.00578297	1	0.011614	-1.99875	-0.00578297	1	0	0	0	0	0	0	0	0	0	0	0
Gov Eq 2 (17)	0	0	0	0	0	0	0	0	0	0	0	0	0	0	0	0	0	0	0	0	0	0	0	0	0	0	0	0	0	0	0	0	1	-38.4	-2	77.7519	1	-38.4	0	0	0	0	0	0	0	0	0	0	0
Gov Eq 1 (18)	0	0	0	0	0	0	0	0	0	0	0	0	0	0	0	0	0	0	0	0	0	0	0	0	0	0	0	0	0	0	0	0	0	0	-0.00578297	1	0.011614	-1.99875	-0.00578297	1	0	0	0	0	0	0	0	0	0
Gov Eq 2 (18)	0	0	0	0	0	0	0	0	0	0	0	0	0	0	0	0	0	0	0	0	0	0	0	0	0	0	0	0	0	0	0	0	0	0	1	-38.4	-2	77.7519	1	-38.4	0	0	0	0	0	0	0	0	0
Gov Eq 1 (19)	0	0	0	0	0	0	0	0	0	0	0	0	0	0	0	0	0	0	0	0	0	0	0	0	0	0	0	0	0	0	0	0	0	0	0	0	-0.00578297	1	0.011614	-1.99875	-0.00578297	1	0	0	0	0	0	0	0
Gov Eq 2 (19)	0	0	0	0	0	0	0	0	0	0	0	0	0	0	0	0	0	0	0	0	0	0	0	0	0	0	0	0	0	0	0	0	0	0	0	0	1	-38.4	-2	77.7519	1	-38.4	0	0	0	0	0	0	0
Gov Eq 1 (20)	0	0	0	0	0	0	0	0	0	0	0	0	0	0	0	0	0	0	0	0	0	0	0	0	0	0	0	0	0	0	0	0	0	0	0	0	0	0	-0.00578297	1	0.011614	-1.99875	-0.00578297	1	0	0	0	0	0
Gov Eq 2 (20)	0	0	0	0	0	0	0	0	0	0	0	0	0	0	0	0	0	0	0	0	0	0	0	0	0	0	0	0	0	0	0	0	0	0	0	0	0	0	1	-38.4	-2	77.7519	1	-38.4	0	0	0	0	0
Gov Eq 1 (21)	0	0	0	0	0	0	0	0	0	0	0	0	0	0	0	0	0	0	0	0	0	0	0	0	0	0	0	0	0	0	0	0	0	0	0	0	0	0	0	0	-0.00578297	1	0.011614	-1.99875	-0.00578297	1	0	0	0
Gov Eq 2 (21)	0	0	0	0	0	0	0	0	0	0	0	0	0	0	0	0	0	0	0	0	0	0	0	0	0	0	0	0	0	0	0	0	0	0	0	0	0	0	0	0	1	-38.4	-2	77.7519	1	-38.4	0	0	0
Gov Eq 1 (22)	0	0	0	0	0	0	0	0	0	0	0	0	0	0	0	0	0	0	0	0	0	0	0	0	0	0	0	0	0	0	0	0	0	0	0	0	0	0	0	0	0	0	-0.00578297	1	0.011614	-1.99875	-0.00578297	1	0
Gov Eq 2 (22)	0	0	0	0	0	0	0	0	0	0	0	0	0	0	0	0	0	0	0	0	0	0	0	0	0	0	0	0	0	0	0	0	0	0	0	0	0	0	0	0	0	0	1	-38.4	-2	77.7519	1	-38.4	0
Gov Eq 1 (23)	0	0	0	0	0	0	0	0	0	0	0	0	0	0	0	0	0	0	0	0	0	0	0	0	0	0	0	0	0	0	0	0	0	0	0	0	0	0	0	0	0	0	0	0	-0.00578297	1	0.011614	-1.99875	-0.00578297
Gov Eq 2 (23)	0	0	0	0	0	0	0	0	0	0	0	0	0	0	0	0	0	0	0	0	0	0	0	0	0	0	0	0	0	0	0	0	0	0	0	0	0	0	0	0	0	0	0	0	1	-38.4	-2	77.7519	1
Gov Eq 1 (24)	0	0	0	0	0	0	0	0	0	0	0	0	0	0	0	0	0	0	0	0	0	0	0	0	0	0	0	0	0	0	0	0	0	0	0	0	0	0	0	0	0	0	0	0	0	0	-0.00578297	1	0.011614
Gov Eq 2 (24)	0	0	0	0	0	0	0	0	0	0	0	0	0	0	0	0	0	0	0	0	0	0	0	0	0	0	0	0	0	0	0	0	0	0	0	0	0	0	0	0	0	0	0	0	0	0	1	-38.4	-2
Gov Eq 1 (25)	0	0	0	0	0	0	0	0	0	0	0	0	0	0	0	0	0	0	0	0	0	0	0	0	0	0	0	0	0	0	0	0	0	0	0	0	0	0	0	0	0	0	0	0	0	0	0	0	-0.00578297
Gov Eq 2 (25)	0	0	0	0	0	0	0	0	0	0	0	0	0	0	0	0	0	0	0	0	0	0	0	0	0	0	0	0	0	0	0	0	0	0	0	0	0	0	0	0	0	0	0	0	0	0	0	0	1
Gov Eq 1 (26)	0	0	0	0	0	0	0	0	0	0	0	0	0	0	0	0	0	0	0	0	0	0	0	0	0	0	0	0	0	0	0	0	0	0	0	0	0	0	0	0	0	0	0	0	0	0	0	0	0
Gov Eq 2 (26)	0	0	0	0	0	0	0	0	0	0	0	0	0	0	0	0	0	0	0	0	0	0	0	0	0	0	0	0	0	0	0	0	0	0	0	0	0	0	0	0	0	0	0	0	0	0	0	0	0
Gov Eq 1 (27)	0	0	0	0	0	0	0	0	0	0	0	0	0	0	0	0	0	0	0	0	0	0	0	0	0	0	0	0	0	0	0	0	0	0	0	0	0	0	0	0	0	0	0	0	0	0	0	0	0
Gov Eq 2 (27)	0	0	0	0	0	0	0	0	0	0	0	0	0	0	0	0	0	0	0	0	0	0	0	0	0	0	0	0	0	0	0	0	0	0	0	0	0	0	0	0	0	0	0	0	0	0	0	0	0
Gov Eq 1 (28)	0	0	0	0	0	0	0	0	0	0	0	0	0	0	0	0	0	0	0	0	0	0	0	0	0	0	0	0	0	0	0	0	0	0	0	0	0	0	0	0	0	0	0	0	0	0	0	0	0
Gov Eq 2 (28)	0	0	0	0	0	0	0	0	0	0	0	0	0	0	0	0	0	0	0	0	0	0	0	0	0	0	0	0	0	0	0	0	0	0	0	0	0	0	0	0	0	0	0	0	0	0	0	0	0
Gov Eq 1 (29)	0	0	0	0	0	0	0	0	0	0	0	0	0	0	0	0	0	0	0	0	0	0	0	0	0	0	0	0	0	0	0	0	0	0	0	0	0	0	0	0	0	0	0	0	0	0	0	0	0
Gov Eq 2 (29)	0	0	0	0	0	0	0	0	0	0	0	0	0	0	0	0	0	0	0	0	0	0	0	0	0	0	0	0	0	0	0	0	0	0	0	0	0	0	0	0	0	0	0	0	0	0	0	0	0
Gov Eq 1 (30)	0	0	0	0	0	0	0	0	0	0	0	0	0	0	0	0	0	0	0	0	0	0	0	0	0	0	0	0	0	0	0	0	0	0	0	0	0	0	0	0	0	0	0	0	0	0	0	0	0
Gov Eq 2 (30)	0	0	0	0	0	0	0	0	0	0	0	0	0	0	0	0	0	0	0	0	0	0	0	0	0	0	0	0	0	0	0	0	0	0	0	0	0	0	0	0	0	0	0	0	0	0	0	0	0
Gov Eq 1 (31)	0	0	0	0	0	0	0	0	0	0	0	0	0	0	0	0	0	0	0	0	0	0	0	0	0	0	0	0	0	0	0	0	0	0	0	0	0	0	0	0	0	0	0	0	0	0	0	0	0
Gov Eq 2 (31)	0	0	0	0	0	0	0	0	0	0	0	0	0	0	0	0	0	0	0	0	0	0	0	0	0	0	0	0	0	0	0	0	0	0	0	0	0	0	0	0	0	0	0	0	0	0	0	0	0
Gov Eq 1 (32)	0	0	0	0	0	0	0	0	0	0	0	0	0	0	0	0	0	0	0	0	0	0	0	0	0	0	0	0	0	0	0	0	0	0	0	0	0	0	0	0	0	0	0	0	0	0	0	0	0
Gov Eq 2 (32)	0	0	0	0	0	0	0	0	0	0	0	0	0	0	0	0	0	0	0	0	0	0	0	0	0	0	0	0	0	0	0	0	0	0	0	0	0	0	0	0	0	0	0	0	0	0	0	0	0
Gov Eq 1 (33)	0	0	0	0	0	0	0	0	0	0	0	0	0	0	0	0	0	0	0	0	0	0	0	0	0	0	0	0	0	0	0	0	0	0	0	0	0	0	0	0	0	0	0	0	0	0	0	0	0
Gov Eq 2 (33)	0	0	0	0	0	0	0	0	0	0	0	0	0	0	0	0	0	0	0	0	0	0	0	0	0	0	0	0	0	0	0	0	0	0	0	0	0	0	0	0	0	0	0	0	0	0	0	0	0
Bo Co 1 (1)	0	0	1	0	0	0	0	0	0	0	0	0	0	0	0	0	0	0	0	0	0	0	0	0	0	0	0	0	0	0	0	0	0	0	0	0	0	0	0	0	0	0	0	0	0	0	0	0	0
Bo Co 2 (1)	0.0260417	-1	0	0	-0.0260417	1	0	0	0	0	0	0	0	0	0	0	0	0	0	0	0	0	0	0	0	0	0	0	0	0	0	0	0	0	0	0	0	0	0	0	0	0	0	0	0	0	0	0	0
BoCo 1 (33)	0	0	0	0	0	0	0	0	0	0	0	0	0	0	0	0	0	0	0	0	0	0	0	0	0	0	0	0	0	0	0	0	0	0	0	0	0	0	0	0	0	0	0	0	0	0	0	0	0
BoCo 2 (33)	0	0	0	0	0	0	0	0	0	0	0	0	0	0	0	0	0	0	0	0	0	0	0	0	0	0	0	0	0	0	0	0	0	0	0	0	0	0	0	0	0	0	0	0	0	0	0	0	0
[truncated: 21 more columns]
