# Supplementary material for: Timoshenko Beam Theory:First-Order Analysis, Second-Order Analysis, Stability, and Vibration Analysis Using the Finite Difference Method
Source: Preprints.org preprint supplement (doi:10.20944/preprints202105.0252.v1), 2021-05-11
Supplement: Supplementary file 8 [file Vibration analysis of a pinned pinned beam with an axial load.xlsx]

## Sheet: w-fi FDM approximation
		Free vibration of a pinned-pinned Timoshenko beam
		resting on Winkler foundation and subjected to a compressive force
		W-F FDM approximation
			Nine-point grid							The governing equations
		blk =	0.125				0.416667
		a = EI/kGAl²=	0.0375				0.324139
		kRI =	0.01
							0.644783
	Coefficient of axial force		-5.92176
							2.40225
Winkler foundation			77.9273
			-0.0925275
			9.60434		Determinant =	-3.28259e-07
	W0	hkF0	W1	hkF1	W2	hkF2	W3	hkF3	W4	hkF4	W5	hkF5	W6	hkF6	W7	hkF7	W8	hkF8	W9	hkF9	W10	hkF10
Gov Eq 1 (1)	0.324139	0.208333	-0.644783	0	0.324139	-0.208333	0	0	0	0	0	0	0	0	0	0	0	0	0	0	0	0
Gov Eq 2 (1)	-0.208333	1	0	-2.40225	0.208333	1	0	0	0	0	0	0	0	0	0	0	0	0	0	0	0	0
Gov Eq 1 (2)	0	0	0.324139	0.208333	-0.644783	0	0.324139	-0.208333	0	0	0	0	0	0	0	0	0	0	0	0	0	0
Gov Eq 2 (2)	0	0	-0.208333	1	0	-2.40225	0.208333	1	0	0	0	0	0	0	0	0	0	0	0	0	0	0
Gov Eq 1 (3)	0	0	0	0	0.324139	0.208333	-0.644783	0	0.324139	-0.208333	0	0	0	0	0	0	0	0	0	0	0	0
Gov Eq 2 (3)	0	0	0	0	-0.208333	1	0	-2.40225	0.208333	1	0	0	0	0	0	0	0	0	0	0	0	0
Gov Eq 1 (4)	0	0	0	0	0	0	0.324139	0.208333	-0.644783	0	0.324139	-0.208333	0	0	0	0	0	0	0	0	0	0
Gov Eq 2 (4)	0	0	0	0	0	0	-0.208333	1	0	-2.40225	0.208333	1	0	0	0	0	0	0	0	0	0	0
Gov Eq 1 (5)	0	0	0	0	0	0	0	0	0.324139	0.208333	-0.644783	0	0.324139	-0.208333	0	0	0	0	0	0	0	0
Gov Eq 2 (5)	0	0	0	0	0	0	0	0	-0.208333	1	0	-2.40225	0.208333	1	0	0	0	0	0	0	0	0
Gov Eq 1 (6)	0	0	0	0	0	0	0	0	0	0	0.324139	0.208333	-0.644783	0	0.324139	-0.208333	0	0	0	0	0	0
Gov Eq 2 (6)	0	0	0	0	0	0	0	0	0	0	-0.208333	1	0	-2.40225	0.208333	1	0	0	0	0	0	0
Gov Eq 1 (7)	0	0	0	0	0	0	0	0	0	0	0	0	0.324139	0.208333	-0.644783	0	0.324139	-0.208333	0	0	0	0
Gov Eq 2 (7)	0	0	0	0	0	0	0	0	0	0	0	0	-0.208333	1	0	-2.40225	0.208333	1	0	0	0	0
Gov Eq 1 (8)	0	0	0	0	0	0	0	0	0	0	0	0	0	0	0.324139	0.208333	-0.644783	0	0.324139	-0.208333	0	0
Gov Eq 2 (8)	0	0	0	0	0	0	0	0	0	0	0	0	0	0	-0.208333	1	0	-2.40225	0.208333	1	0	0
Gov Eq 1 (9)	0	0	0	0	0	0	0	0	0	0	0	0	0	0	0	0	0.324139	0.208333	-0.644783	0	0.324139	-0.208333
Gov Eq 2 (9)	0	0	0	0	0	0	0	0	0	0	0	0	0	0	0	0	-0.208333	1	0	-2.40225	0.208333	1
BoCo 1 (1)	0	0	1	0	0	0	0	0	0	0	0	0	0	0	0	0	0	0	0	0	0	0
BoCo 2 (1)	0	1	0	0	0	-1	0	0	0	0	0	0	0	0	0	0	0	0	0	0	0	0
BoCo 1 (9)	0	0	0	0	0	0	0	0	0	0	0	0	0	0	0	0	0	0	1	0	0	0
BoCo 2 (9)	0	0	0	0	0	0	0	0	0	0	0	0	0	0	0	0	0	1	0	0	0	-1
	W-F FDM approximation
		Seventeen-point grid								The governing equations
		blk =	0.0625				0.104167
		a = EI/kGAl²=	0.0375				0.0810348
		kRI =	0.01
							0.161923
	Coefficient of axial force		-5.92176
							2.10075
Winkler foundation			77.9273
			-0.0231319
			9.35672		Determinant =	-1.81458e-05
	W0	hkF0	W1	hkF1	W2	hkF2	W3	hkF3	W4	hkF4	W5	hkF5	W6	hkF6	W7	hkF7	W8	hkF8	W9	hkF9	W10	hkF10	W11	hkF11	W12	hkF12	W13	hkF13	W14	hkF14	W15	hkF15	W16	hkF16	W17	hkF17	W18	hkF18
Gov Eq 1 (1)	0.0810348	0.0520833	-0.161923	0	0.0810348	-0.0520833	0	0	0	0	0	0	0	0	0	0	0	0	0	0	0	0	0	0	0	0	0	0	0	0	0	0	0	0	0	0	0	0
Gov Eq 2 (1)	-0.0520833	1	0	-2.10075	0.0520833	1	0	0	0	0	0	0	0	0	0	0	0	0	0	0	0	0	0	0	0	0	0	0	0	0	0	0	0	0	0	0	0	0
Gov Eq 1 (2)	0	0	0.0810348	0.0520833	-0.161923	0	0.0810348	-0.0520833	0	0	0	0	0	0	0	0	0	0	0	0	0	0	0	0	0	0	0	0	0	0	0	0	0	0	0	0	0	0
Gov Eq 2 (2)	0	0	-0.0520833	1	0	-2.10075	0.0520833	1	0	0	0	0	0	0	0	0	0	0	0	0	0	0	0	0	0	0	0	0	0	0	0	0	0	0	0	0	0	0
Gov Eq 1 (3)	0	0	0	0	0.0810348	0.0520833	-0.161923	0	0.0810348	-0.0520833	0	0	0	0	0	0	0	0	0	0	0	0	0	0	0	0	0	0	0	0	0	0	0	0	0	0	0	0
Gov Eq 2 (3)	0	0	0	0	-0.0520833	1	0	-2.10075	0.0520833	1	0	0	0	0	0	0	0	0	0	0	0	0	0	0	0	0	0	0	0	0	0	0	0	0	0	0	0	0
Gov Eq 1 (4)	0	0	0	0	0	0	0.0810348	0.0520833	-0.161923	0	0.0810348	-0.0520833	0	0	0	0	0	0	0	0	0	0	0	0	0	0	0	0	0	0	0	0	0	0	0	0	0	0
Gov Eq 2 (4)	0	0	0	0	0	0	-0.0520833	1	0	-2.10075	0.0520833	1	0	0	0	0	0	0	0	0	0	0	0	0	0	0	0	0	0	0	0	0	0	0	0	0	0	0
Gov Eq 1 (5)	0	0	0	0	0	0	0	0	0.0810348	0.0520833	-0.161923	0	0.0810348	-0.0520833	0	0	0	0	0	0	0	0	0	0	0	0	0	0	0	0	0	0	0	0	0	0	0	0
Gov Eq 2 (5)	0	0	0	0	0	0	0	0	-0.0520833	1	0	-2.10075	0.0520833	1	0	0	0	0	0	0	0	0	0	0	0	0	0	0	0	0	0	0	0	0	0	0	0	0
Gov Eq 1 (6)	0	0	0	0	0	0	0	0	0	0	0.0810348	0.0520833	-0.161923	0	0.0810348	-0.0520833	0	0	0	0	0	0	0	0	0	0	0	0	0	0	0	0	0	0	0	0	0	0
Gov Eq 2 (6)	0	0	0	0	0	0	0	0	0	0	-0.0520833	1	0	-2.10075	0.0520833	1	0	0	0	0	0	0	0	0	0	0	0	0	0	0	0	0	0	0	0	0	0	0
Gov Eq 1 (7)	0	0	0	0	0	0	0	0	0	0	0	0	0.0810348	0.0520833	-0.161923	0	0.0810348	-0.0520833	0	0	0	0	0	0	0	0	0	0	0	0	0	0	0	0	0	0	0	0
Gov Eq 2 (7)	0	0	0	0	0	0	0	0	0	0	0	0	-0.0520833	1	0	-2.10075	0.0520833	1	0	0	0	0	0	0	0	0	0	0	0	0	0	0	0	0	0	0	0	0
Gov Eq 1 (8)	0	0	0	0	0	0	0	0	0	0	0	0	0	0	0.0810348	0.0520833	-0.161923	0	0.0810348	-0.0520833	0	0	0	0	0	0	0	0	0	0	0	0	0	0	0	0	0	0
Gov Eq 2 (8)	0	0	0	0	0	0	0	0	0	0	0	0	0	0	-0.0520833	1	0	-2.10075	0.0520833	1	0	0	0	0	0	0	0	0	0	0	0	0	0	0	0	0	0	0
Gov Eq 1 (9)	0	0	0	0	0	0	0	0	0	0	0	0	0	0	0	0	0.0810348	0.0520833	-0.161923	0	0.0810348	-0.0520833	0	0	0	0	0	0	0	0	0	0	0	0	0	0	0	0
Gov Eq 2 (9)	0	0	0	0	0	0	0	0	0	0	0	0	0	0	0	0	-0.0520833	1	0	-2.10075	0.0520833	1	0	0	0	0	0	0	0	0	0	0	0	0	0	0	0	0
Gov Eq 1 (10)	0	0	0	0	0	0	0	0	0	0	0	0	0	0	0	0	0	0	0.0810348	0.0520833	-0.161923	0	0.0810348	-0.0520833	0	0	0	0	0	0	0	0	0	0	0	0	0	0
Gov Eq 2 (10)	0	0	0	0	0	0	0	0	0	0	0	0	0	0	0	0	0	0	-0.0520833	1	0	-2.10075	0.0520833	1	0	0	0	0	0	0	0	0	0	0	0	0	0	0
Gov Eq 1 (11)	0	0	0	0	0	0	0	0	0	0	0	0	0	0	0	0	0	0	0	0	0.0810348	0.0520833	-0.161923	0	0.0810348	-0.0520833	0	0	0	0	0	0	0	0	0	0	0	0
Gov Eq 2 (11)	0	0	0	0	0	0	0	0	0	0	0	0	0	0	0	0	0	0	0	0	-0.0520833	1	0	-2.10075	0.0520833	1	0	0	0	0	0	0	0	0	0	0	0	0
Gov Eq 1 (12)	0	0	0	0	0	0	0	0	0	0	0	0	0	0	0	0	0	0	0	0	0	0	0.0810348	0.0520833	-0.161923	0	0.0810348	-0.0520833	0	0	0	0	0	0	0	0	0	0
Gov Eq 2 (12)	0	0	0	0	0	0	0	0	0	0	0	0	0	0	0	0	0	0	0	0	0	0	-0.0520833	1	0	-2.10075	0.0520833	1	0	0	0	0	0	0	0	0	0	0
Gov Eq 1 (13)	0	0	0	0	0	0	0	0	0	0	0	0	0	0	0	0	0	0	0	0	0	0	0	0	0.0810348	0.0520833	-0.161923	0	0.0810348	-0.0520833	0	0	0	0	0	0	0	0
Gov Eq 2 (13)	0	0	0	0	0	0	0	0	0	0	0	0	0	0	0	0	0	0	0	0	0	0	0	0	-0.0520833	1	0	-2.10075	0.0520833	1	0	0	0	0	0	0	0	0
Gov Eq 1 (14)	0	0	0	0	0	0	0	0	0	0	0	0	0	0	0	0	0	0	0	0	0	0	0	0	0	0	0.0810348	0.0520833	-0.161923	0	0.0810348	-0.0520833	0	0	0	0	0	0
Gov Eq 2 (14)	0	0	0	0	0	0	0	0	0	0	0	0	0	0	0	0	0	0	0	0	0	0	0	0	0	0	-0.0520833	1	0	-2.10075	0.0520833	1	0	0	0	0	0	0
Gov Eq 1 (15)	0	0	0	0	0	0	0	0	0	0	0	0	0	0	0	0	0	0	0	0	0	0	0	0	0	0	0	0	0.0810348	0.0520833	-0.161923	0	0.0810348	-0.0520833	0	0	0	0
Gov Eq 2 (15)	0	0	0	0	0	0	0	0	0	0	0	0	0	0	0	0	0	0	0	0	0	0	0	0	0	0	0	0	-0.0520833	1	0	-2.10075	0.0520833	1	0	0	0	0
Gov Eq 1 (16)	0	0	0	0	0	0	0	0	0	0	0	0	0	0	0	0	0	0	0	0	0	0	0	0	0	0	0	0	0	0	0.0810348	0.0520833	-0.161923	0	0.0810348	-0.0520833	0	0
Gov Eq 2 (16)	0	0	0	0	0	0	0	0	0	0	0	0	0	0	0	0	0	0	0	0	0	0	0	0	0	0	0	0	0	0	-0.0520833	1	0	-2.10075	0.0520833	1	0	0
Gov Eq 1 (17)	0	0	0	0	0	0	0	0	0	0	0	0	0	0	0	0	0	0	0	0	0	0	0	0	0	0	0	0	0	0	0	0	0.0810348	0.0520833	-0.161923	0	0.0810348	-0.0520833
Gov Eq 2 (17)	0	0	0	0	0	0	0	0	0	0	0	0	0	0	0	0	0	0	0	0	0	0	0	0	0	0	0	0	0	0	0	0	-0.0520833	1	0	-2.10075	0.0520833	1
BoCo 1 (1)	0	0	1	0	0	0	0	0	0	0	0	0	0	0	0	0	0	0	0	0	0	0	0	0	0	0	0	0	0	0	0	0	0	0	0	0	0	0
BoCo 2 (1)	0	1	0	0	0	-1	0	0	0	0	0	0	0	0	0	0	0	0	0	0	0	0	0	0	0	0	0	0	0	0	0	0	0	0	0	0	0	0
BoCo 1 (17)	0	0	0	0	0	0	0	0	0	0	0	0	0	0	0	0	0	0	0	0	0	0	0	0	0	0	0	0	0	0	0	0	0	0	1	0	0	0
BoCo 2 (17)	0	0	0	0	0	0	0	0	0	0	0	0	0	0	0	0	0	0	0	0	0	0	0	0	0	0	0	0	0	0	0	0	0	1	0	0	0	-1
	W-F FDM approximation
		Twenty five-point grid								The governing equations
		blk =	0.0416667				0.0462963
		a = EI/kGAl²=	0.0375				0.0360155
		kRI =	0.01
							0.0720046
	Coefficient of axial force		-5.92176
							2.04479
Winkler foundation			77.9273
			-0.0102808
			9.30926		Determinant =	-6.07428e-09
	W0	hkF0	W1	hkF1	W2	hkF2	W3	hkF3	W4	hkF4	W5	hkF5	W6	hkF6	W7	hkF7	W8	hkF8	W9	hkF9	W10	hkF10	W11	hkF11	W12	hkF12	W13	hkF13	W14	hkF14	W15	hkF15	W16	hkF16	W17	hkF17	W18	hkF18	W19	hkF19	W20	hkF20	W21	hkF21	W22	hkF22	W23	hkF23	W24
Gov Eq 1 (1)	0.0360155	0.0231481	-0.0720046	0	0.0360155	-0.0231481	0	0	0	0	0	0	0	0	0	0	0	0	0	0	0	0	0	0	0	0	0	0	0	0	0	0	0	0	0	0	0	0	0	0	0	0	0	0	0	0	0	0	0
Gov Eq 2 (1)	-0.0231481	1	0	-2.04479	0.0231481	1	0	0	0	0	0	0	0	0	0	0	0	0	0	0	0	0	0	0	0	0	0	0	0	0	0	0	0	0	0	0	0	0	0	0	0	0	0	0	0	0	0	0	0
Gov Eq 1 (2)	0	0	0.0360155	0.0231481	-0.0720046	0	0.0360155	-0.0231481	0	0	0	0	0	0	0	0	0	0	0	0	0	0	0	0	0	0	0	0	0	0	0	0	0	0	0	0	0	0	0	0	0	0	0	0	0	0	0	0	0
Gov Eq 2 (2)	0	0	-0.0231481	1	0	-2.04479	0.0231481	1	0	0	0	0	0	0	0	0	0	0	0	0	0	0	0	0	0	0	0	0	0	0	0	0	0	0	0	0	0	0	0	0	0	0	0	0	0	0	0	0	0
Gov Eq 1 (3)	0	0	0	0	0.0360155	0.0231481	-0.0720046	0	0.0360155	-0.0231481	0	0	0	0	0	0	0	0	0	0	0	0	0	0	0	0	0	0	0	0	0	0	0	0	0	0	0	0	0	0	0	0	0	0	0	0	0	0	0
Gov Eq 2 (3)	0	0	0	0	-0.0231481	1	0	-2.04479	0.0231481	1	0	0	0	0	0	0	0	0	0	0	0	0	0	0	0	0	0	0	0	0	0	0	0	0	0	0	0	0	0	0	0	0	0	0	0	0	0	0	0
Gov Eq 1 (4)	0	0	0	0	0	0	0.0360155	0.0231481	-0.0720046	0	0.0360155	-0.0231481	0	0	0	0	0	0	0	0	0	0	0	0	0	0	0	0	0	0	0	0	0	0	0	0	0	0	0	0	0	0	0	0	0	0	0	0	0
Gov Eq 2 (4)	0	0	0	0	0	0	-0.0231481	1	0	-2.04479	0.0231481	1	0	0	0	0	0	0	0	0	0	0	0	0	0	0	0	0	0	0	0	0	0	0	0	0	0	0	0	0	0	0	0	0	0	0	0	0	0
Gov Eq 1 (5)	0	0	0	0	0	0	0	0	0.0360155	0.0231481	-0.0720046	0	0.0360155	-0.0231481	0	0	0	0	0	0	0	0	0	0	0	0	0	0	0	0	0	0	0	0	0	0	0	0	0	0	0	0	0	0	0	0	0	0	0
Gov Eq 2 (5)	0	0	0	0	0	0	0	0	-0.0231481	1	0	-2.04479	0.0231481	1	0	0	0	0	0	0	0	0	0	0	0	0	0	0	0	0	0	0	0	0	0	0	0	0	0	0	0	0	0	0	0	0	0	0	0
Gov Eq 1 (6)	0	0	0	0	0	0	0	0	0	0	0.0360155	0.0231481	-0.0720046	0	0.0360155	-0.0231481	0	0	0	0	0	0	0	0	0	0	0	0	0	0	0	0	0	0	0	0	0	0	0	0	0	0	0	0	0	0	0	0	0
Gov Eq 2 (6)	0	0	0	0	0	0	0	0	0	0	-0.0231481	1	0	-2.04479	0.0231481	1	0	0	0	0	0	0	0	0	0	0	0	0	0	0	0	0	0	0	0	0	0	0	0	0	0	0	0	0	0	0	0	0	0
Gov Eq 1 (7)	0	0	0	0	0	0	0	0	0	0	0	0	0.0360155	0.0231481	-0.0720046	0	0.0360155	-0.0231481	0	0	0	0	0	0	0	0	0	0	0	0	0	0	0	0	0	0	0	0	0	0	0	0	0	0	0	0	0	0	0
Gov Eq 2 (7)	0	0	0	0	0	0	0	0	0	0	0	0	-0.0231481	1	0	-2.04479	0.0231481	1	0	0	0	0	0	0	0	0	0	0	0	0	0	0	0	0	0	0	0	0	0	0	0	0	0	0	0	0	0	0	0
Gov Eq 1 (8)	0	0	0	0	0	0	0	0	0	0	0	0	0	0	0.0360155	0.0231481	-0.0720046	0	0.0360155	-0.0231481	0	0	0	0	0	0	0	0	0	0	0	0	0	0	0	0	0	0	0	0	0	0	0	0	0	0	0	0	0
Gov Eq 2 (8)	0	0	0	0	0	0	0	0	0	0	0	0	0	0	-0.0231481	1	0	-2.04479	0.0231481	1	0	0	0	0	0	0	0	0	0	0	0	0	0	0	0	0	0	0	0	0	0	0	0	0	0	0	0	0	0
Gov Eq 1 (9)	0	0	0	0	0	0	0	0	0	0	0	0	0	0	0	0	0.0360155	0.0231481	-0.0720046	0	0.0360155	-0.0231481	0	0	0	0	0	0	0	0	0	0	0	0	0	0	0	0	0	0	0	0	0	0	0	0	0	0	0
Gov Eq 2 (9)	0	0	0	0	0	0	0	0	0	0	0	0	0	0	0	0	-0.0231481	1	0	-2.04479	0.0231481	1	0	0	0	0	0	0	0	0	0	0	0	0	0	0	0	0	0	0	0	0	0	0	0	0	0	0	0
Gov Eq 1 (10)	0	0	0	0	0	0	0	0	0	0	0	0	0	0	0	0	0	0	0.0360155	0.0231481	-0.0720046	0	0.0360155	-0.0231481	0	0	0	0	0	0	0	0	0	0	0	0	0	0	0	0	0	0	0	0	0	0	0	0	0
Gov Eq 2 (10)	0	0	0	0	0	0	0	0	0	0	0	0	0	0	0	0	0	0	-0.0231481	1	0	-2.04479	0.0231481	1	0	0	0	0	0	0	0	0	0	0	0	0	0	0	0	0	0	0	0	0	0	0	0	0	0
Gov Eq 1 (11)	0	0	0	0	0	0	0	0	0	0	0	0	0	0	0	0	0	0	0	0	0.0360155	0.0231481	-0.0720046	0	0.0360155	-0.0231481	0	0	0	0	0	0	0	0	0	0	0	0	0	0	0	0	0	0	0	0	0	0	0
Gov Eq 2 (11)	0	0	0	0	0	0	0	0	0	0	0	0	0	0	0	0	0	0	0	0	-0.0231481	1	0	-2.04479	0.0231481	1	0	0	0	0	0	0	0	0	0	0	0	0	0	0	0	0	0	0	0	0	0	0	0
Gov Eq 1 (12)	0	0	0	0	0	0	0	0	0	0	0	0	0	0	0	0	0	0	0	0	0	0	0.0360155	0.0231481	-0.0720046	0	0.0360155	-0.0231481	0	0	0	0	0	0	0	0	0	0	0	0	0	0	0	0	0	0	0	0	0
Gov Eq 2 (12)	0	0	0	0	0	0	0	0	0	0	0	0	0	0	0	0	0	0	0	0	0	0	-0.0231481	1	0	-2.04479	0.0231481	1	0	0	0	0	0	0	0	0	0	0	0	0	0	0	0	0	0	0	0	0	0
Gov Eq 1 (13)	0	0	0	0	0	0	0	0	0	0	0	0	0	0	0	0	0	0	0	0	0	0	0	0	0.0360155	0.0231481	-0.0720046	0	0.0360155	-0.0231481	0	0	0	0	0	0	0	0	0	0	0	0	0	0	0	0	0	0	0
Gov Eq 2 (13)	0	0	0	0	0	0	0	0	0	0	0	0	0	0	0	0	0	0	0	0	0	0	0	0	-0.0231481	1	0	-2.04479	0.0231481	1	0	0	0	0	0	0	0	0	0	0	0	0	0	0	0	0	0	0	0
Gov Eq 1 (14)	0	0	0	0	0	0	0	0	0	0	0	0	0	0	0	0	0	0	0	0	0	0	0	0	0	0	0.0360155	0.0231481	-0.0720046	0	0.0360155	-0.0231481	0	0	0	0	0	0	0	0	0	0	0	0	0	0	0	0	0
Gov Eq 2 (14)	0	0	0	0	0	0	0	0	0	0	0	0	0	0	0	0	0	0	0	0	0	0	0	0	0	0	-0.0231481	1	0	-2.04479	0.0231481	1	0	0	0	0	0	0	0	0	0	0	0	0	0	0	0	0	0
Gov Eq 1 (15)	0	0	0	0	0	0	0	0	0	0	0	0	0	0	0	0	0	0	0	0	0	0	0	0	0	0	0	0	0.0360155	0.0231481	-0.0720046	0	0.0360155	-0.0231481	0	0	0	0	0	0	0	0	0	0	0	0	0	0	0
Gov Eq 2 (15)	0	0	0	0	0	0	0	0	0	0	0	0	0	0	0	0	0	0	0	0	0	0	0	0	0	0	0	0	-0.0231481	1	0	-2.04479	0.0231481	1	0	0	0	0	0	0	0	0	0	0	0	0	0	0	0
Gov Eq 1 (16)	0	0	0	0	0	0	0	0	0	0	0	0	0	0	0	0	0	0	0	0	0	0	0	0	0	0	0	0	0	0	0.0360155	0.0231481	-0.0720046	0	0.0360155	-0.0231481	0	0	0	0	0	0	0	0	0	0	0	0	0
Gov Eq 2 (16)	0	0	0	0	0	0	0	0	0	0	0	0	0	0	0	0	0	0	0	0	0	0	0	0	0	0	0	0	0	0	-0.0231481	1	0	-2.04479	0.0231481	1	0	0	0	0	0	0	0	0	0	0	0	0	0
Gov Eq 1 (17)	0	0	0	0	0	0	0	0	0	0	0	0	0	0	0	0	0	0	0	0	0	0	0	0	0	0	0	0	0	0	0	0	0.0360155	0.0231481	-0.0720046	0	0.0360155	-0.0231481	0	0	0	0	0	0	0	0	0	0	0
Gov Eq 2 (17)	0	0	0	0	0	0	0	0	0	0	0	0	0	0	0	0	0	0	0	0	0	0	0	0	0	0	0	0	0	0	0	0	-0.0231481	1	0	-2.04479	0.0231481	1	0	0	0	0	0	0	0	0	0	0	0
Gov Eq 1 (18)	0	0	0	0	0	0	0	0	0	0	0	0	0	0	0	0	0	0	0	0	0	0	0	0	0	0	0	0	0	0	0	0	0	0	0.0360155	0.0231481	-0.0720046	0	0.0360155	-0.0231481	0	0	0	0	0	0	0	0	0
Gov Eq 2 (18)	0	0	0	0	0	0	0	0	0	0	0	0	0	0	0	0	0	0	0	0	0	0	0	0	0	0	0	0	0	0	0	0	0	0	-0.0231481	1	0	-2.04479	0.0231481	1	0	0	0	0	0	0	0	0	0
Gov Eq 1 (19)	0	0	0	0	0	0	0	0	0	0	0	0	0	0	0	0	0	0	0	0	0	0	0	0	0	0	0	0	0	0	0	0	0	0	0	0	0.0360155	0.0231481	-0.0720046	0	0.0360155	-0.0231481	0	0	0	0	0	0	0
Gov Eq 2 (19)	0	0	0	0	0	0	0	0	0	0	0	0	0	0	0	0	0	0	0	0	0	0	0	0	0	0	0	0	0	0	0	0	0	0	0	0	-0.0231481	1	0	-2.04479	0.0231481	1	0	0	0	0	0	0	0
Gov Eq 1 (20)	0	0	0	0	0	0	0	0	0	0	0	0	0	0	0	0	0	0	0	0	0	0	0	0	0	0	0	0	0	0	0	0	0	0	0	0	0	0	0.0360155	0.0231481	-0.0720046	0	0.0360155	-0.0231481	0	0	0	0	0
Gov Eq 2 (20)	0	0	0	0	0	0	0	0	0	0	0	0	0	0	0	0	0	0	0	0	0	0	0	0	0	0	0	0	0	0	0	0	0	0	0	0	0	0	-0.0231481	1	0	-2.04479	0.0231481	1	0	0	0	0	0
Gov Eq 1 (21)	0	0	0	0	0	0	0	0	0	0	0	0	0	0	0	0	0	0	0	0	0	0	0	0	0	0	0	0	0	0	0	0	0	0	0	0	0	0	0	0	0.0360155	0.0231481	-0.0720046	0	0.0360155	-0.0231481	0	0	0
Gov Eq 2 (21)	0	0	0	0	0	0	0	0	0	0	0	0	0	0	0	0	0	0	0	0	0	0	0	0	0	0	0	0	0	0	0	0	0	0	0	0	0	0	0	0	-0.0231481	1	0	-2.04479	0.0231481	1	0	0	0
Gov Eq 1 (22)	0	0	0	0	0	0	0	0	0	0	0	0	0	0	0	0	0	0	0	0	0	0	0	0	0	0	0	0	0	0	0	0	0	0	0	0	0	0	0	0	0	0	0.0360155	0.0231481	-0.0720046	0	0.0360155	-0.0231481	0
Gov Eq 2 (22)	0	0	0	0	0	0	0	0	0	0	0	0	0	0	0	0	0	0	0	0	0	0	0	0	0	0	0	0	0	0	0	0	0	0	0	0	0	0	0	0	0	0	-0.0231481	1	0	-2.04479	0.0231481	1	0
Gov Eq 1 (23)	0	0	0	0	0	0	0	0	0	0	0	0	0	0	0	0	0	0	0	0	0	0	0	0	0	0	0	0	0	0	0	0	0	0	0	0	0	0	0	0	0	0	0	0	0.0360155	0.0231481	-0.0720046	0	0.0360155
Gov Eq 2 (23)	0	0	0	0	0	0	0	0	0	0	0	0	0	0	0	0	0	0	0	0	0	0	0	0	0	0	0	0	0	0	0	0	0	0	0	0	0	0	0	0	0	0	0	0	-0.0231481	1	0	-2.04479	0.0231481
Gov Eq 1 (24)	0	0	0	0	0	0	0	0	0	0	0	0	0	0	0	0	0	0	0	0	0	0	0	0	0	0	0	0	0	0	0	0	0	0	0	0	0	0	0	0	0	0	0	0	0	0	0.0360155	0.0231481	-0.0720046
Gov Eq 2 (24)	0	0	0	0	0	0	0	0	0	0	0	0	0	0	0	0	0	0	0	0	0	0	0	0	0	0	0	0	0	0	0	0	0	0	0	0	0	0	0	0	0	0	0	0	0	0	-0.0231481	1	0
Gov Eq 1 (25)	0	0	0	0	0	0	0	0	0	0	0	0	0	0	0	0	0	0	0	0	0	0	0	0	0	0	0	0	0	0	0	0	0	0	0	0	0	0	0	0	0	0	0	0	0	0	0	0	0.0360155
Gov Eq 2 (25)	0	0	0	0	0	0	0	0	0	0	0	0	0	0	0	0	0	0	0	0	0	0	0	0	0	0	0	0	0	0	0	0	0	0	0	0	0	0	0	0	0	0	0	0	0	0	0	0	-0.0231481
BoCo 1 (1)	0	0	1	0	0	0	0	0	0	0	0	0	0	0	0	0	0	0	0	0	0	0	0	0	0	0	0	0	0	0	0	0	0	0	0	0	0	0	0	0	0	0	0	0	0	0	0	0	0
BoCo 2 (1)	0	1	0	0	0	-1	0	0	0	0	0	0	0	0	0	0	0	0	0	0	0	0	0	0	0	0	0	0	0	0	0	0	0	0	0	0	0	0	0	0	0	0	0	0	0	0	0	0	0
BoCo 1 (25)	0	0	0	0	0	0	0	0	0	0	0	0	0	0	0	0	0	0	0	0	0	0	0	0	0	0	0	0	0	0	0	0	0	0	0	0	0	0	0	0	0	0	0	0	0	0	0	0	0
BoCo 2 (25)	0	0	0	0	0	0	0	0	0	0	0	0	0	0	0	0	0	0	0	0	0	0	0	0	0	0	0	0	0	0	0	0	0	0	0	0	0	0	0	0	0	0	0	0	0	0	0	0	0
	W-F FDM approximation
		Thirty three-point grid								The governing equations
		blk =	0.03125				0.0260417
		a = EI/kGAl²=	0.0375				0.0202587
		kRI =	0.01
							0.0405094
	Coefficient of axial force		-5.92176
							2.0252
Winkler foundation			77.9273
										9 pt	17 pt	25 pt	33 pt
			-0.00578297					0	3.46648	4.26106	3.68461	3.56536	3.5225
								0.2 p4	5.52398	6.05742	5.66425	5.58694	5.55952
								0.4 p4	7.00019	7.43094	7.11207	7.05028	7.02844
								0.6 p4	8.21469	8.58696	8.31083	8.25768	8.23893
			9.29253		Determinant =	-1.1583e-08		0.8 p4	9.27091	9.60434	9.35672	9.30926	9.29253
	W0	hkF0	W1	hkF1	W2	hkF2	W3	hkF3	W4	hkF4	W5	hkF5	W6	hkF6	W7	hkF7	W8	hkF8	W9	hkF9	W10	hkF10	W11	hkF11	W12	hkF12	W13	hkF13	W14	hkF14	W15	hkF15	W16	hkF16	W17	hkF17	W18	hkF18	W19	hkF19	W20	hkF20	W21	hkF21	W22	hkF22	W23	hkF23	W24
Gov Eq 1 (1)	0.0202587	0.0130208	-0.0405094	0	0.0202587	-0.0130208	0	0	0	0	0	0	0	0	0	0	0	0	0	0	0	0	0	0	0	0	0	0	0	0	0	0	0	0	0	0	0	0	0	0	0	0	0	0	0	0	0	0	0
Gov Eq 2 (1)	-0.0130208	1	0	-2.0252	0.0130208	1	0	0	0	0	0	0	0	0	0	0	0	0	0	0	0	0	0	0	0	0	0	0	0	0	0	0	0	0	0	0	0	0	0	0	0	0	0	0	0	0	0	0	0
Gov Eq 1 (2)	0	0	0.0202587	0.0130208	-0.0405094	0	0.0202587	-0.0130208	0	0	0	0	0	0	0	0	0	0	0	0	0	0	0	0	0	0	0	0	0	0	0	0	0	0	0	0	0	0	0	0	0	0	0	0	0	0	0	0	0
Gov Eq 2 (2)	0	0	-0.0130208	1	0	-2.0252	0.0130208	1	0	0	0	0	0	0	0	0	0	0	0	0	0	0	0	0	0	0	0	0	0	0	0	0	0	0	0	0	0	0	0	0	0	0	0	0	0	0	0	0	0
Gov Eq 1 (3)	0	0	0	0	0.0202587	0.0130208	-0.0405094	0	0.0202587	-0.0130208	0	0	0	0	0	0	0	0	0	0	0	0	0	0	0	0	0	0	0	0	0	0	0	0	0	0	0	0	0	0	0	0	0	0	0	0	0	0	0
Gov Eq 2 (3)	0	0	0	0	-0.0130208	1	0	-2.0252	0.0130208	1	0	0	0	0	0	0	0	0	0	0	0	0	0	0	0	0	0	0	0	0	0	0	0	0	0	0	0	0	0	0	0	0	0	0	0	0	0	0	0
Gov Eq 1 (4)	0	0	0	0	0	0	0.0202587	0.0130208	-0.0405094	0	0.0202587	-0.0130208	0	0	0	0	0	0	0	0	0	0	0	0	0	0	0	0	0	0	0	0	0	0	0	0	0	0	0	0	0	0	0	0	0	0	0	0	0
Gov Eq 2 (4)	0	0	0	0	0	0	-0.0130208	1	0	-2.0252	0.0130208	1	0	0	0	0	0	0	0	0	0	0	0	0	0	0	0	0	0	0	0	0	0	0	0	0	0	0	0	0	0	0	0	0	0	0	0	0	0
Gov Eq 1 (5)	0	0	0	0	0	0	0	0	0.0202587	0.0130208	-0.0405094	0	0.0202587	-0.0130208	0	0	0	0	0	0	0	0	0	0	0	0	0	0	0	0	0	0	0	0	0	0	0	0	0	0	0	0	0	0	0	0	0	0	0
Gov Eq 2 (5)	0	0	0	0	0	0	0	0	-0.0130208	1	0	-2.0252	0.0130208	1	0	0	0	0	0	0	0	0	0	0	0	0	0	0	0	0	0	0	0	0	0	0	0	0	0	0	0	0	0	0	0	0	0	0	0
Gov Eq 1 (6)	0	0	0	0	0	0	0	0	0	0	0.0202587	0.0130208	-0.0405094	0	0.0202587	-0.0130208	0	0	0	0	0	0	0	0	0	0	0	0	0	0	0	0	0	0	0	0	0	0	0	0	0	0	0	0	0	0	0	0	0
Gov Eq 2 (6)	0	0	0	0	0	0	0	0	0	0	-0.0130208	1	0	-2.0252	0.0130208	1	0	0	0	0	0	0	0	0	0	0	0	0	0	0	0	0	0	0	0	0	0	0	0	0	0	0	0	0	0	0	0	0	0
Gov Eq 1 (7)	0	0	0	0	0	0	0	0	0	0	0	0	0.0202587	0.0130208	-0.0405094	0	0.0202587	-0.0130208	0	0	0	0	0	0	0	0	0	0	0	0	0	0	0	0	0	0	0	0	0	0	0	0	0	0	0	0	0	0	0
Gov Eq 2 (7)	0	0	0	0	0	0	0	0	0	0	0	0	-0.0130208	1	0	-2.0252	0.0130208	1	0	0	0	0	0	0	0	0	0	0	0	0	0	0	0	0	0	0	0	0	0	0	0	0	0	0	0	0	0	0	0
Gov Eq 1 (8)	0	0	0	0	0	0	0	0	0	0	0	0	0	0	0.0202587	0.0130208	-0.0405094	0	0.0202587	-0.0130208	0	0	0	0	0	0	0	0	0	0	0	0	0	0	0	0	0	0	0	0	0	0	0	0	0	0	0	0	0
Gov Eq 2 (8)	0	0	0	0	0	0	0	0	0	0	0	0	0	0	-0.0130208	1	0	-2.0252	0.0130208	1	0	0	0	0	0	0	0	0	0	0	0	0	0	0	0	0	0	0	0	0	0	0	0	0	0	0	0	0	0
Gov Eq 1 (9)	0	0	0	0	0	0	0	0	0	0	0	0	0	0	0	0	0.0202587	0.0130208	-0.0405094	0	0.0202587	-0.0130208	0	0	0	0	0	0	0	0	0	0	0	0	0	0	0	0	0	0	0	0	0	0	0	0	0	0	0
Gov Eq 2 (9)	0	0	0	0	0	0	0	0	0	0	0	0	0	0	0	0	-0.0130208	1	0	-2.0252	0.0130208	1	0	0	0	0	0	0	0	0	0	0	0	0	0	0	0	0	0	0	0	0	0	0	0	0	0	0	0
Gov Eq 1 (10)	0	0	0	0	0	0	0	0	0	0	0	0	0	0	0	0	0	0	0.0202587	0.0130208	-0.0405094	0	0.0202587	-0.0130208	0	0	0	0	0	0	0	0	0	0	0	0	0	0	0	0	0	0	0	0	0	0	0	0	0
Gov Eq 2 (10)	0	0	0	0	0	0	0	0	0	0	0	0	0	0	0	0	0	0	-0.0130208	1	0	-2.0252	0.0130208	1	0	0	0	0	0	0	0	0	0	0	0	0	0	0	0	0	0	0	0	0	0	0	0	0	0
Gov Eq 1 (11)	0	0	0	0	0	0	0	0	0	0	0	0	0	0	0	0	0	0	0	0	0.0202587	0.0130208	-0.0405094	0	0.0202587	-0.0130208	0	0	0	0	0	0	0	0	0	0	0	0	0	0	0	0	0	0	0	0	0	0	0
Gov Eq 2 (11)	0	0	0	0	0	0	0	0	0	0	0	0	0	0	0	0	0	0	0	0	-0.0130208	1	0	-2.0252	0.0130208	1	0	0	0	0	0	0	0	0	0	0	0	0	0	0	0	0	0	0	0	0	0	0	0
Gov Eq 1 (12)	0	0	0	0	0	0	0	0	0	0	0	0	0	0	0	0	0	0	0	0	0	0	0.0202587	0.0130208	-0.0405094	0	0.0202587	-0.0130208	0	0	0	0	0	0	0	0	0	0	0	0	0	0	0	0	0	0	0	0	0
Gov Eq 2 (12)	0	0	0	0	0	0	0	0	0	0	0	0	0	0	0	0	0	0	0	0	0	0	-0.0130208	1	0	-2.0252	0.0130208	1	0	0	0	0	0	0	0	0	0	0	0	0	0	0	0	0	0	0	0	0	0
Gov Eq 1 (13)	0	0	0	0	0	0	0	0	0	0	0	0	0	0	0	0	0	0	0	0	0	0	0	0	0.0202587	0.0130208	-0.0405094	0	0.0202587	-0.0130208	0	0	0	0	0	0	0	0	0	0	0	0	0	0	0	0	0	0	0
Gov Eq 2 (13)	0	0	0	0	0	0	0	0	0	0	0	0	0	0	0	0	0	0	0	0	0	0	0	0	-0.0130208	1	0	-2.0252	0.0130208	1	0	0	0	0	0	0	0	0	0	0	0	0	0	0	0	0	0	0	0
Gov Eq 1 (14)	0	0	0	0	0	0	0	0	0	0	0	0	0	0	0	0	0	0	0	0	0	0	0	0	0	0	0.0202587	0.0130208	-0.0405094	0	0.0202587	-0.0130208	0	0	0	0	0	0	0	0	0	0	0	0	0	0	0	0	0
Gov Eq 2 (14)	0	0	0	0	0	0	0	0	0	0	0	0	0	0	0	0	0	0	0	0	0	0	0	0	0	0	-0.0130208	1	0	-2.0252	0.0130208	1	0	0	0	0	0	0	0	0	0	0	0	0	0	0	0	0	0
Gov Eq 1 (15)	0	0	0	0	0	0	0	0	0	0	0	0	0	0	0	0	0	0	0	0	0	0	0	0	0	0	0	0	0.0202587	0.0130208	-0.0405094	0	0.0202587	-0.0130208	0	0	0	0	0	0	0	0	0	0	0	0	0	0	0
Gov Eq 2 (15)	0	0	0	0	0	0	0	0	0	0	0	0	0	0	0	0	0	0	0	0	0	0	0	0	0	0	0	0	-0.0130208	1	0	-2.0252	0.0130208	1	0	0	0	0	0	0	0	0	0	0	0	0	0	0	0
Gov Eq 1 (16)	0	0	0	0	0	0	0	0	0	0	0	0	0	0	0	0	0	0	0	0	0	0	0	0	0	0	0	0	0	0	0.0202587	0.0130208	-0.0405094	0	0.0202587	-0.0130208	0	0	0	0	0	0	0	0	0	0	0	0	0
Gov Eq 2 (16)	0	0	0	0	0	0	0	0	0	0	0	0	0	0	0	0	0	0	0	0	0	0	0	0	0	0	0	0	0	0	-0.0130208	1	0	-2.0252	0.0130208	1	0	0	0	0	0	0	0	0	0	0	0	0	0
Gov Eq 1 (17)	0	0	0	0	0	0	0	0	0	0	0	0	0	0	0	0	0	0	0	0	0	0	0	0	0	0	0	0	0	0	0	0	0.0202587	0.0130208	-0.0405094	0	0.0202587	-0.0130208	0	0	0	0	0	0	0	0	0	0	0
Gov Eq 2 (17)	0	0	0	0	0	0	0	0	0	0	0	0	0	0	0	0	0	0	0	0	0	0	0	0	0	0	0	0	0	0	0	0	-0.0130208	1	0	-2.0252	0.0130208	1	0	0	0	0	0	0	0	0	0	0	0
Gov Eq 1 (18)	0	0	0	0	0	0	0	0	0	0	0	0	0	0	0	0	0	0	0	0	0	0	0	0	0	0	0	0	0	0	0	0	0	0	0.0202587	0.0130208	-0.0405094	0	0.0202587	-0.0130208	0	0	0	0	0	0	0	0	0
Gov Eq 2 (18)	0	0	0	0	0	0	0	0	0	0	0	0	0	0	0	0	0	0	0	0	0	0	0	0	0	0	0	0	0	0	0	0	0	0	-0.0130208	1	0	-2.0252	0.0130208	1	0	0	0	0	0	0	0	0	0
Gov Eq 1 (19)	0	0	0	0	0	0	0	0	0	0	0	0	0	0	0	0	0	0	0	0	0	0	0	0	0	0	0	0	0	0	0	0	0	0	0	0	0.0202587	0.0130208	-0.0405094	0	0.0202587	-0.0130208	0	0	0	0	0	0	0
Gov Eq 2 (19)	0	0	0	0	0	0	0	0	0	0	0	0	0	0	0	0	0	0	0	0	0	0	0	0	0	0	0	0	0	0	0	0	0	0	0	0	-0.0130208	1	0	-2.0252	0.0130208	1	0	0	0	0	0	0	0
Gov Eq 1 (20)	0	0	0	0	0	0	0	0	0	0	0	0	0	0	0	0	0	0	0	0	0	0	0	0	0	0	0	0	0	0	0	0	0	0	0	0	0	0	0.0202587	0.0130208	-0.0405094	0	0.0202587	-0.0130208	0	0	0	0	0
Gov Eq 2 (20)	0	0	0	0	0	0	0	0	0	0	0	0	0	0	0	0	0	0	0	0	0	0	0	0	0	0	0	0	0	0	0	0	0	0	0	0	0	0	-0.0130208	1	0	-2.0252	0.0130208	1	0	0	0	0	0
Gov Eq 1 (21)	0	0	0	0	0	0	0	0	0	0	0	0	0	0	0	0	0	0	0	0	0	0	0	0	0	0	0	0	0	0	0	0	0	0	0	0	0	0	0	0	0.0202587	0.0130208	-0.0405094	0	0.0202587	-0.0130208	0	0	0
Gov Eq 2 (21)	0	0	0	0	0	0	0	0	0	0	0	0	0	0	0	0	0	0	0	0	0	0	0	0	0	0	0	0	0	0	0	0	0	0	0	0	0	0	0	0	-0.0130208	1	0	-2.0252	0.0130208	1	0	0	0
Gov Eq 1 (22)	0	0	0	0	0	0	0	0	0	0	0	0	0	0	0	0	0	0	0	0	0	0	0	0	0	0	0	0	0	0	0	0	0	0	0	0	0	0	0	0	0	0	0.0202587	0.0130208	-0.0405094	0	0.0202587	-0.0130208	0
Gov Eq 2 (22)	0	0	0	0	0	0	0	0	0	0	0	0	0	0	0	0	0	0	0	0	0	0	0	0	0	0	0	0	0	0	0	0	0	0	0	0	0	0	0	0	0	0	-0.0130208	1	0	-2.0252	0.0130208	1	0
Gov Eq 1 (23)	0	0	0	0	0	0	0	0	0	0	0	0	0	0	0	0	0	0	0	0	0	0	0	0	0	0	0	0	0	0	0	0	0	0	0	0	0	0	0	0	0	0	0	0	0.0202587	0.0130208	-0.0405094	0	0.0202587
Gov Eq 2 (23)	0	0	0	0	0	0	0	0	0	0	0	0	0	0	0	0	0	0	0	0	0	0	0	0	0	0	0	0	0	0	0	0	0	0	0	0	0	0	0	0	0	0	0	0	-0.0130208	1	0	-2.0252	0.0130208
Gov Eq 1 (24)	0	0	0	0	0	0	0	0	0	0	0	0	0	0	0	0	0	0	0	0	0	0	0	0	0	0	0	0	0	0	0	0	0	0	0	0	0	0	0	0	0	0	0	0	0	0	0.0202587	0.0130208	-0.0405094
Gov Eq 2 (24)	0	0	0	0	0	0	0	0	0	0	0	0	0	0	0	0	0	0	0	0	0	0	0	0	0	0	0	0	0	0	0	0	0	0	0	0	0	0	0	0	0	0	0	0	0	0	-0.0130208	1	0
Gov Eq 1 (25)	0	0	0	0	0	0	0	0	0	0	0	0	0	0	0	0	0	0	0	0	0	0	0	0	0	0	0	0	0	0	0	0	0	0	0	0	0	0	0	0	0	0	0	0	0	0	0	0	0.0202587
Gov Eq 2 (25)	0	0	0	0	0	0	0	0	0	0	0	0	0	0	0	0	0	0	0	0	0	0	0	0	0	0	0	0	0	0	0	0	0	0	0	0	0	0	0	0	0	0	0	0	0	0	0	0	-0.0130208
Gov Eq 1 (26)	0	0	0	0	0	0	0	0	0	0	0	0	0	0	0	0	0	0	0	0	0	0	0	0	0	0	0	0	0	0	0	0	0	0	0	0	0	0	0	0	0	0	0	0	0	0	0	0	0
Gov Eq 2 (26)	0	0	0	0	0	0	0	0	0	0	0	0	0	0	0	0	0	0	0	0	0	0	0	0	0	0	0	0	0	0	0	0	0	0	0	0	0	0	0	0	0	0	0	0	0	0	0	0	0
Gov Eq 1 (27)	0	0	0	0	0	0	0	0	0	0	0	0	0	0	0	0	0	0	0	0	0	0	0	0	0	0	0	0	0	0	0	0	0	0	0	0	0	0	0	0	0	0	0	0	0	0	0	0	0
Gov Eq 2 (27)	0	0	0	0	0	0	0	0	0	0	0	0	0	0	0	0	0	0	0	0	0	0	0	0	0	0	0	0	0	0	0	0	0	0	0	0	0	0	0	0	0	0	0	0	0	0	0	0	0
Gov Eq 1 (28)	0	0	0	0	0	0	0	0	0	0	0	0	0	0	0	0	0	0	0	0	0	0	0	0	0	0	0	0	0	0	0	0	0	0	0	0	0	0	0	0	0	0	0	0	0	0	0	0	0
Gov Eq 2 (28)	0	0	0	0	0	0	0	0	0	0	0	0	0	0	0	0	0	0	0	0	0	0	0	0	0	0	0	0	0	0	0	0	0	0	0	0	0	0	0	0	0	0	0	0	0	0	0	0	0
Gov Eq 1 (29)	0	0	0	0	0	0	0	0	0	0	0	0	0	0	0	0	0	0	0	0	0	0	0	0	0	0	0	0	0	0	0	0	0	0	0	0	0	0	0	0	0	0	0	0	0	0	0	0	0
Gov Eq 2 (29)	0	0	0	0	0	0	0	0	0	0	0	0	0	0	0	0	0	0	0	0	0	0	0	0	0	0	0	0	0	0	0	0	0	0	0	0	0	0	0	0	0	0	0	0	0	0	0	0	0
Gov Eq 1 (30)	0	0	0	0	0	0	0	0	0	0	0	0	0	0	0	0	0	0	0	0	0	0	0	0	0	0	0	0	0	0	0	0	0	0	0	0	0	0	0	0	0	0	0	0	0	0	0	0	0
Gov Eq 2 (30)	0	0	0	0	0	0	0	0	0	0	0	0	0	0	0	0	0	0	0	0	0	0	0	0	0	0	0	0	0	0	0	0	0	0	0	0	0	0	0	0	0	0	0	0	0	0	0	0	0
Gov Eq 1 (31)	0	0	0	0	0	0	0	0	0	0	0	0	0	0	0	0	0	0	0	0	0	0	0	0	0	0	0	0	0	0	0	0	0	0	0	0	0	0	0	0	0	0	0	0	0	0	0	0	0
Gov Eq 2 (31)	0	0	0	0	0	0	0	0	0	0	0	0	0	0	0	0	0	0	0	0	0	0	0	0	0	0	0	0	0	0	0	0	0	0	0	0	0	0	0	0	0	0	0	0	0	0	0	0	0
Gov Eq 1 (32)	0	0	0	0	0	0	0	0	0	0	0	0	0	0	0	0	0	0	0	0	0	0	0	0	0	0	0	0	0	0	0	0	0	0	0	0	0	0	0	0	0	0	0	0	0	0	0	0	0
Gov Eq 2 (32)	0	0	0	0	0	0	0	0	0	0	0	0	0	0	0	0	0	0	0	0	0	0	0	0	0	0	0	0	0	0	0	0	0	0	0	0	0	0	0	0	0	0	0	0	0	0	0	0	0
Gov Eq 1 (33)	0	0	0	0	0	0	0	0	0	0	0	0	0	0	0	0	0	0	0	0	0	0	0	0	0	0	0	0	0	0	0	0	0	0	0	0	0	0	0	0	0	0	0	0	0	0	0	0	0
Gov Eq 2 (33)	0	0	0	0	0	0	0	0	0	0	0	0	0	0	0	0	0	0	0	0	0	0	0	0	0	0	0	0	0	0	0	0	0	0	0	0	0	0	0	0	0	0	0	0	0	0	0	0	0
BoCo 1 (1)	0	0	1	0	0	0	0	0	0	0	0	0	0	0	0	0	0	0	0	0	0	0	0	0	0	0	0	0	0	0	0	0	0	0	0	0	0	0	0	0	0	0	0	0	0	0	0	0	0
BoCo 2 (1)	0	1	0	0	0	-1	0	0	0	0	0	0	0	0	0	0	0	0	0	0	0	0	0	0	0	0	0	0	0	0	0	0	0	0	0	0	0	0	0	0	0	0	0	0	0	0	0	0	0
BoCo 1 (33)	0	0	0	0	0	0	0	0	0	0	0	0	0	0	0	0	0	0	0	0	0	0	0	0	0	0	0	0	0	0	0	0	0	0	0	0	0	0	0	0	0	0	0	0	0	0	0	0	0
BoCo 2 (33)	0	0	0	0	0	0	0	0	0	0	0	0	0	0	0	0	0	0	0	0	0	0	0	0	0	0	0	0	0	0	0	0	0	0	0	0	0	0	0	0	0	0	0	0	0	0	0	0	0
[truncated: 21 more columns]

## Sheet: M-W FDM approx
		Free vibration of a pinned-pinned Timoshenko beam
		resting on Winkler foundation and subjected to a compressive force
		M-W FDM approximation
		Nine-point grid
			blk =	0.125
						The governing equation
			a = EI/kGAl²=	0.0375
			kRI =	0.01			-1.98669
		Coefficient of axial force		-5.92176
							-0.18683
	Winkler foundation			77.9273			5.76805
							2.4
				-0.0925275
						Determinant =	-1.17717e-08
				9.23034
	W0	h²M0	W1	h²M1	W2	h²M2	W3	h²M3	W4	h²M4	W5	h²M5	W6	h²M6	W7	h²M7	W8	h²M8	W9	h²M9	W10	h²M10
Gov Eq 1 (1)	-0.0925275	1	0.18683	-1.98669	-0.0925275	1	0	0	0	0	0	0	0	0	0	0	0	0	0	0	0	0
Gov Eq 2 (1)	1	-2.4	-2	5.76805	1	-2.4	0	0	0	0	0	0	0	0	0	0	0	0	0	0	0	0
Gov Eq 1 (2)	0	0	-0.0925275	1	0.18683	-1.98669	-0.0925275	1	0	0	0	0	0	0	0	0	0	0	0	0	0	0
Gov Eq 2 (2)	0	0	1	-2.4	-2	5.76805	1	-2.4	0	0	0	0	0	0	0	0	0	0	0	0	0	0
Gov Eq 1 (3)	0	0	0	0	-0.0925275	1	0.18683	-1.98669	-0.0925275	1	0	0	0	0	0	0	0	0	0	0	0	0
Gov Eq 2 (3)	0	0	0	0	1	-2.4	-2	5.76805	1	-2.4	0	0	0	0	0	0	0	0	0	0	0	0
Gov Eq 1 (4)	0	0	0	0	0	0	-0.0925275	1	0.18683	-1.98669	-0.0925275	1	0	0	0	0	0	0	0	0	0	0
Gov Eq 2 (4)	0	0	0	0	0	0	1	-2.4	-2	5.76805	1	-2.4	0	0	0	0	0	0	0	0	0	0
Gov Eq 1 (5)	0	0	0	0	0	0	0	0	-0.0925275	1	0.18683	-1.98669	-0.0925275	1	0	0	0	0	0	0	0	0
Gov Eq 2 (5)	0	0	0	0	0	0	0	0	1	-2.4	-2	5.76805	1	-2.4	0	0	0	0	0	0	0	0
Gov Eq 1 (6)	0	0	0	0	0	0	0	0	0	0	-0.0925275	1	0.18683	-1.98669	-0.0925275	1	0	0	0	0	0	0
Gov Eq 2 (6)	0	0	0	0	0	0	0	0	0	0	1	-2.4	-2	5.76805	1	-2.4	0	0	0	0	0	0
Gov Eq 1 (7)	0	0	0	0	0	0	0	0	0	0	0	0	-0.0925275	1	0.18683	-1.98669	-0.0925275	1	0	0	0	0
Gov Eq 2 (7)	0	0	0	0	0	0	0	0	0	0	0	0	1	-2.4	-2	5.76805	1	-2.4	0	0	0	0
Gov Eq 1 (8)	0	0	0	0	0	0	0	0	0	0	0	0	0	0	-0.0925275	1	0.18683	-1.98669	-0.0925275	1	0	0
Gov Eq 2 (8)	0	0	0	0	0	0	0	0	0	0	0	0	0	0	1	-2.4	-2	5.76805	1	-2.4	0	0
Gov Eq 1 (9)	0	0	0	0	0	0	0	0	0	0	0	0	0	0	0	0	-0.0925275	1	0.18683	-1.98669	-0.0925275	1
Gov Eq 2 (9)	0	0	0	0	0	0	0	0	0	0	0	0	0	0	0	0	1	-2.4	-2	5.76805	1	-2.4
Bo Co 1 (1)	0	0	1	0	0	0	0	0	0	0	0	0	0	0	0	0	0	0	0	0	0	0
Bo Co 2 (1)	0	0	0	1	0	0	0	0	0	0	0	0	0	0	0	0	0	0	0	0	0	0
Bo Co 1 (9)	0	0	0	0	0	0	0	0	0	0	0	0	0	0	0	0	0	0	1	0	0	0
Bo Co 2 (9)	0	0	0	0	0	0	0	0	0	0	0	0	0	0	0	0	0	0	0	1	0	0
		M-W FDM approximation
		Seventeen-point grid
			blk =	0.0625
						The governing equation
			a = EI/kGAl²=	0.0375
			kRI =	0.01			-1.99665
		Coefficient of axial force		-5.92176
							-0.0463833
	Winkler foundation			77.9273			20.1678
							9.6
				-0.0231319
						Determinant =	-5.3994e-05
				9.26069
	W0	h²M0	W1	h²M1	W2	h²M2	W3	h²M3	W4	h²M4	W5	h²M5	W6	h²M6	W7	h²M7	W8	h²M8	W9	h²M9	W10	h²M10	W11	h²M11	W12	h²M12	W13	h²M13	W14	h²M14	W15	h²M15	W16	h²M16	W17	h²M17	W18	h²M18
Gov Eq 1 (1)	-0.0231319	1	0.0463833	-1.99665	-0.0231319	1	0	0	0	0	0	0	0	0	0	0	0	0	0	0	0	0	0	0	0	0	0	0	0	0	0	0	0	0	0	0	0	0
Gov Eq 2 (1)	1	-9.6	-2	20.1678	1	-9.6	0	0	0	0	0	0	0	0	0	0	0	0	0	0	0	0	0	0	0	0	0	0	0	0	0	0	0	0	0	0	0	0
Gov Eq 1 (2)	0	0	-0.0231319	1	0.0463833	-1.99665	-0.0231319	1	0	0	0	0	0	0	0	0	0	0	0	0	0	0	0	0	0	0	0	0	0	0	0	0	0	0	0	0	0	0
Gov Eq 2 (2)	0	0	1	-9.6	-2	20.1678	1	-9.6	0	0	0	0	0	0	0	0	0	0	0	0	0	0	0	0	0	0	0	0	0	0	0	0	0	0	0	0	0	0
Gov Eq 1 (3)	0	0	0	0	-0.0231319	1	0.0463833	-1.99665	-0.0231319	1	0	0	0	0	0	0	0	0	0	0	0	0	0	0	0	0	0	0	0	0	0	0	0	0	0	0	0	0
Gov Eq 2 (3)	0	0	0	0	1	-9.6	-2	20.1678	1	-9.6	0	0	0	0	0	0	0	0	0	0	0	0	0	0	0	0	0	0	0	0	0	0	0	0	0	0	0	0
Gov Eq 1 (4)	0	0	0	0	0	0	-0.0231319	1	0.0463833	-1.99665	-0.0231319	1	0	0	0	0	0	0	0	0	0	0	0	0	0	0	0	0	0	0	0	0	0	0	0	0	0	0
Gov Eq 2 (4)	0	0	0	0	0	0	1	-9.6	-2	20.1678	1	-9.6	0	0	0	0	0	0	0	0	0	0	0	0	0	0	0	0	0	0	0	0	0	0	0	0	0	0
Gov Eq 1 (5)	0	0	0	0	0	0	0	0	-0.0231319	1	0.0463833	-1.99665	-0.0231319	1	0	0	0	0	0	0	0	0	0	0	0	0	0	0	0	0	0	0	0	0	0	0	0	0
Gov Eq 2 (5)	0	0	0	0	0	0	0	0	1	-9.6	-2	20.1678	1	-9.6	0	0	0	0	0	0	0	0	0	0	0	0	0	0	0	0	0	0	0	0	0	0	0	0
Gov Eq 1 (6)	0	0	0	0	0	0	0	0	0	0	-0.0231319	1	0.0463833	-1.99665	-0.0231319	1	0	0	0	0	0	0	0	0	0	0	0	0	0	0	0	0	0	0	0	0	0	0
Gov Eq 2 (6)	0	0	0	0	0	0	0	0	0	0	1	-9.6	-2	20.1678	1	-9.6	0	0	0	0	0	0	0	0	0	0	0	0	0	0	0	0	0	0	0	0	0	0
Gov Eq 1 (7)	0	0	0	0	0	0	0	0	0	0	0	0	-0.0231319	1	0.0463833	-1.99665	-0.0231319	1	0	0	0	0	0	0	0	0	0	0	0	0	0	0	0	0	0	0	0	0
Gov Eq 2 (7)	0	0	0	0	0	0	0	0	0	0	0	0	1	-9.6	-2	20.1678	1	-9.6	0	0	0	0	0	0	0	0	0	0	0	0	0	0	0	0	0	0	0	0
Gov Eq 1 (8)	0	0	0	0	0	0	0	0	0	0	0	0	0	0	-0.0231319	1	0.0463833	-1.99665	-0.0231319	1	0	0	0	0	0	0	0	0	0	0	0	0	0	0	0	0	0	0
Gov Eq 2 (8)	0	0	0	0	0	0	0	0	0	0	0	0	0	0	1	-9.6	-2	20.1678	1	-9.6	0	0	0	0	0	0	0	0	0	0	0	0	0	0	0	0	0	0
Gov Eq 1 (9)	0	0	0	0	0	0	0	0	0	0	0	0	0	0	0	0	-0.0231319	1	0.0463833	-1.99665	-0.0231319	1	0	0	0	0	0	0	0	0	0	0	0	0	0	0	0	0
Gov Eq 2 (9)	0	0	0	0	0	0	0	0	0	0	0	0	0	0	0	0	1	-9.6	-2	20.1678	1	-9.6	0	0	0	0	0	0	0	0	0	0	0	0	0	0	0	0
Gov Eq 1 (10)	0	0	0	0	0	0	0	0	0	0	0	0	0	0	0	0	0	0	-0.0231319	1	0.0463833	-1.99665	-0.0231319	1	0	0	0	0	0	0	0	0	0	0	0	0	0	0
Gov Eq 2 (10)	0	0	0	0	0	0	0	0	0	0	0	0	0	0	0	0	0	0	1	-9.6	-2	20.1678	1	-9.6	0	0	0	0	0	0	0	0	0	0	0	0	0	0
Gov Eq 1 (11)	0	0	0	0	0	0	0	0	0	0	0	0	0	0	0	0	0	0	0	0	-0.0231319	1	0.0463833	-1.99665	-0.0231319	1	0	0	0	0	0	0	0	0	0	0	0	0
Gov Eq 2 (11)	0	0	0	0	0	0	0	0	0	0	0	0	0	0	0	0	0	0	0	0	1	-9.6	-2	20.1678	1	-9.6	0	0	0	0	0	0	0	0	0	0	0	0
Gov Eq 1 (12)	0	0	0	0	0	0	0	0	0	0	0	0	0	0	0	0	0	0	0	0	0	0	-0.0231319	1	0.0463833	-1.99665	-0.0231319	1	0	0	0	0	0	0	0	0	0	0
Gov Eq 2 (12)	0	0	0	0	0	0	0	0	0	0	0	0	0	0	0	0	0	0	0	0	0	0	1	-9.6	-2	20.1678	1	-9.6	0	0	0	0	0	0	0	0	0	0
Gov Eq 1 (13)	0	0	0	0	0	0	0	0	0	0	0	0	0	0	0	0	0	0	0	0	0	0	0	0	-0.0231319	1	0.0463833	-1.99665	-0.0231319	1	0	0	0	0	0	0	0	0
Gov Eq 2 (13)	0	0	0	0	0	0	0	0	0	0	0	0	0	0	0	0	0	0	0	0	0	0	0	0	1	-9.6	-2	20.1678	1	-9.6	0	0	0	0	0	0	0	0
Gov Eq 1 (14)	0	0	0	0	0	0	0	0	0	0	0	0	0	0	0	0	0	0	0	0	0	0	0	0	0	0	-0.0231319	1	0.0463833	-1.99665	-0.0231319	1	0	0	0	0	0	0
Gov Eq 2 (14)	0	0	0	0	0	0	0	0	0	0	0	0	0	0	0	0	0	0	0	0	0	0	0	0	0	0	1	-9.6	-2	20.1678	1	-9.6	0	0	0	0	0	0
Gov Eq 1 (15)	0	0	0	0	0	0	0	0	0	0	0	0	0	0	0	0	0	0	0	0	0	0	0	0	0	0	0	0	-0.0231319	1	0.0463833	-1.99665	-0.0231319	1	0	0	0	0
Gov Eq 2 (15)	0	0	0	0	0	0	0	0	0	0	0	0	0	0	0	0	0	0	0	0	0	0	0	0	0	0	0	0	1	-9.6	-2	20.1678	1	-9.6	0	0	0	0
Gov Eq 1 (16)	0	0	0	0	0	0	0	0	0	0	0	0	0	0	0	0	0	0	0	0	0	0	0	0	0	0	0	0	0	0	-0.0231319	1	0.0463833	-1.99665	-0.0231319	1	0	0
Gov Eq 2 (16)	0	0	0	0	0	0	0	0	0	0	0	0	0	0	0	0	0	0	0	0	0	0	0	0	0	0	0	0	0	0	1	-9.6	-2	20.1678	1	-9.6	0	0
Gov Eq 1 (17)	0	0	0	0	0	0	0	0	0	0	0	0	0	0	0	0	0	0	0	0	0	0	0	0	0	0	0	0	0	0	0	0	-0.0231319	1	0.0463833	-1.99665	-0.0231319	1
Gov Eq 2 (17)	0	0	0	0	0	0	0	0	0	0	0	0	0	0	0	0	0	0	0	0	0	0	0	0	0	0	0	0	0	0	0	0	1	-9.6	-2	20.1678	1	-9.6
Bo Co 1 (1)	0	0	1	0	0	0	0	0	0	0	0	0	0	0	0	0	0	0	0	0	0	0	0	0	0	0	0	0	0	0	0	0	0	0	0	0	0	0
Bo Co 2 (1)	0	0	0	1	0	0	0	0	0	0	0	0	0	0	0	0	0	0	0	0	0	0	0	0	0	0	0	0	0	0	0	0	0	0	0	0	0	0
Bo Co 1 (17)	0	0	0	0	0	0	0	0	0	0	0	0	0	0	0	0	0	0	0	0	0	0	0	0	0	0	0	0	0	0	0	0	0	0	1	0	0	0
Bo Co 2 (17)	0	0	0	0	0	0	0	0	0	0	0	0	0	0	0	0	0	0	0	0	0	0	0	0	0	0	0	0	0	0	0	0	0	0	0	1	0	0
		M-W FDM approximation
		Twenty five-point grid
			blk =	0.0416667
						The governing equation
			a = EI/kGAl²=	0.0375
			kRI =	0.01			-1.99851
		Coefficient of axial force		-5.92176
							-0.0205856
	Winkler foundation			77.9273			44.1678
							21.6
				-0.0102808
						Determinant =	1.33782e-05
				9.26636
	W0	h²M0	W1	h²M1	W2	h²M2	W3	h²M3	W4	h²M4	W5	h²M5	W6	h²M6	W7	h²M7	W8	h²M8	W9	h²M9	W10	h²M10	W11	h²M11	W12	h²M12	W13	h²M13	W14	h²M14	W15	h²M15	W16	h²M16	W17	h²M17	W18	h²M18	W19	h²M19	W20	h²M20	W21	h²M21	W22	h²M22	W23	h²M23	W24
Gov Eq 1 (1)	-0.0102808	1	0.0205856	-1.99851	-0.0102808	1	0	0	0	0	0	0	0	0	0	0	0	0	0	0	0	0	0	0	0	0	0	0	0	0	0	0	0	0	0	0	0	0	0	0	0	0	0	0	0	0	0	0	0
Gov Eq 2 (1)	1	-21.6	-2	44.1678	1	-21.6	0	0	0	0	0	0	0	0	0	0	0	0	0	0	0	0	0	0	0	0	0	0	0	0	0	0	0	0	0	0	0	0	0	0	0	0	0	0	0	0	0	0	0
Gov Eq 1 (2)	0	0	-0.0102808	1	0.0205856	-1.99851	-0.0102808	1	0	0	0	0	0	0	0	0	0	0	0	0	0	0	0	0	0	0	0	0	0	0	0	0	0	0	0	0	0	0	0	0	0	0	0	0	0	0	0	0	0
Gov Eq 2 (2)	0	0	1	-21.6	-2	44.1678	1	-21.6	0	0	0	0	0	0	0	0	0	0	0	0	0	0	0	0	0	0	0	0	0	0	0	0	0	0	0	0	0	0	0	0	0	0	0	0	0	0	0	0	0
Gov Eq 1 (3)	0	0	0	0	-0.0102808	1	0.0205856	-1.99851	-0.0102808	1	0	0	0	0	0	0	0	0	0	0	0	0	0	0	0	0	0	0	0	0	0	0	0	0	0	0	0	0	0	0	0	0	0	0	0	0	0	0	0
Gov Eq 2 (3)	0	0	0	0	1	-21.6	-2	44.1678	1	-21.6	0	0	0	0	0	0	0	0	0	0	0	0	0	0	0	0	0	0	0	0	0	0	0	0	0	0	0	0	0	0	0	0	0	0	0	0	0	0	0
Gov Eq 1 (4)	0	0	0	0	0	0	-0.0102808	1	0.0205856	-1.99851	-0.0102808	1	0	0	0	0	0	0	0	0	0	0	0	0	0	0	0	0	0	0	0	0	0	0	0	0	0	0	0	0	0	0	0	0	0	0	0	0	0
Gov Eq 2 (4)	0	0	0	0	0	0	1	-21.6	-2	44.1678	1	-21.6	0	0	0	0	0	0	0	0	0	0	0	0	0	0	0	0	0	0	0	0	0	0	0	0	0	0	0	0	0	0	0	0	0	0	0	0	0
Gov Eq 1 (5)	0	0	0	0	0	0	0	0	-0.0102808	1	0.0205856	-1.99851	-0.0102808	1	0	0	0	0	0	0	0	0	0	0	0	0	0	0	0	0	0	0	0	0	0	0	0	0	0	0	0	0	0	0	0	0	0	0	0
Gov Eq 2 (5)	0	0	0	0	0	0	0	0	1	-21.6	-2	44.1678	1	-21.6	0	0	0	0	0	0	0	0	0	0	0	0	0	0	0	0	0	0	0	0	0	0	0	0	0	0	0	0	0	0	0	0	0	0	0
Gov Eq 1 (6)	0	0	0	0	0	0	0	0	0	0	-0.0102808	1	0.0205856	-1.99851	-0.0102808	1	0	0	0	0	0	0	0	0	0	0	0	0	0	0	0	0	0	0	0	0	0	0	0	0	0	0	0	0	0	0	0	0	0
Gov Eq 2 (6)	0	0	0	0	0	0	0	0	0	0	1	-21.6	-2	44.1678	1	-21.6	0	0	0	0	0	0	0	0	0	0	0	0	0	0	0	0	0	0	0	0	0	0	0	0	0	0	0	0	0	0	0	0	0
Gov Eq 1 (7)	0	0	0	0	0	0	0	0	0	0	0	0	-0.0102808	1	0.0205856	-1.99851	-0.0102808	1	0	0	0	0	0	0	0	0	0	0	0	0	0	0	0	0	0	0	0	0	0	0	0	0	0	0	0	0	0	0	0
Gov Eq 2 (7)	0	0	0	0	0	0	0	0	0	0	0	0	1	-21.6	-2	44.1678	1	-21.6	0	0	0	0	0	0	0	0	0	0	0	0	0	0	0	0	0	0	0	0	0	0	0	0	0	0	0	0	0	0	0
Gov Eq 1 (8)	0	0	0	0	0	0	0	0	0	0	0	0	0	0	-0.0102808	1	0.0205856	-1.99851	-0.0102808	1	0	0	0	0	0	0	0	0	0	0	0	0	0	0	0	0	0	0	0	0	0	0	0	0	0	0	0	0	0
Gov Eq 2 (8)	0	0	0	0	0	0	0	0	0	0	0	0	0	0	1	-21.6	-2	44.1678	1	-21.6	0	0	0	0	0	0	0	0	0	0	0	0	0	0	0	0	0	0	0	0	0	0	0	0	0	0	0	0	0
Gov Eq 1 (9)	0	0	0	0	0	0	0	0	0	0	0	0	0	0	0	0	-0.0102808	1	0.0205856	-1.99851	-0.0102808	1	0	0	0	0	0	0	0	0	0	0	0	0	0	0	0	0	0	0	0	0	0	0	0	0	0	0	0
Gov Eq 2 (9)	0	0	0	0	0	0	0	0	0	0	0	0	0	0	0	0	1	-21.6	-2	44.1678	1	-21.6	0	0	0	0	0	0	0	0	0	0	0	0	0	0	0	0	0	0	0	0	0	0	0	0	0	0	0
Gov Eq 1 (10)	0	0	0	0	0	0	0	0	0	0	0	0	0	0	0	0	0	0	-0.0102808	1	0.0205856	-1.99851	-0.0102808	1	0	0	0	0	0	0	0	0	0	0	0	0	0	0	0	0	0	0	0	0	0	0	0	0	0
Gov Eq 2 (10)	0	0	0	0	0	0	0	0	0	0	0	0	0	0	0	0	0	0	1	-21.6	-2	44.1678	1	-21.6	0	0	0	0	0	0	0	0	0	0	0	0	0	0	0	0	0	0	0	0	0	0	0	0	0
Gov Eq 1 (11)	0	0	0	0	0	0	0	0	0	0	0	0	0	0	0	0	0	0	0	0	-0.0102808	1	0.0205856	-1.99851	-0.0102808	1	0	0	0	0	0	0	0	0	0	0	0	0	0	0	0	0	0	0	0	0	0	0	0
Gov Eq 2 (11)	0	0	0	0	0	0	0	0	0	0	0	0	0	0	0	0	0	0	0	0	1	-21.6	-2	44.1678	1	-21.6	0	0	0	0	0	0	0	0	0	0	0	0	0	0	0	0	0	0	0	0	0	0	0
Gov Eq 1 (12)	0	0	0	0	0	0	0	0	0	0	0	0	0	0	0	0	0	0	0	0	0	0	-0.0102808	1	0.0205856	-1.99851	-0.0102808	1	0	0	0	0	0	0	0	0	0	0	0	0	0	0	0	0	0	0	0	0	0
Gov Eq 2 (12)	0	0	0	0	0	0	0	0	0	0	0	0	0	0	0	0	0	0	0	0	0	0	1	-21.6	-2	44.1678	1	-21.6	0	0	0	0	0	0	0	0	0	0	0	0	0	0	0	0	0	0	0	0	0
Gov Eq 1 (13)	0	0	0	0	0	0	0	0	0	0	0	0	0	0	0	0	0	0	0	0	0	0	0	0	-0.0102808	1	0.0205856	-1.99851	-0.0102808	1	0	0	0	0	0	0	0	0	0	0	0	0	0	0	0	0	0	0	0
Gov Eq 2 (13)	0	0	0	0	0	0	0	0	0	0	0	0	0	0	0	0	0	0	0	0	0	0	0	0	1	-21.6	-2	44.1678	1	-21.6	0	0	0	0	0	0	0	0	0	0	0	0	0	0	0	0	0	0	0
Gov Eq 1 (14)	0	0	0	0	0	0	0	0	0	0	0	0	0	0	0	0	0	0	0	0	0	0	0	0	0	0	-0.0102808	1	0.0205856	-1.99851	-0.0102808	1	0	0	0	0	0	0	0	0	0	0	0	0	0	0	0	0	0
Gov Eq 2 (14)	0	0	0	0	0	0	0	0	0	0	0	0	0	0	0	0	0	0	0	0	0	0	0	0	0	0	1	-21.6	-2	44.1678	1	-21.6	0	0	0	0	0	0	0	0	0	0	0	0	0	0	0	0	0
Gov Eq 1 (15)	0	0	0	0	0	0	0	0	0	0	0	0	0	0	0	0	0	0	0	0	0	0	0	0	0	0	0	0	-0.0102808	1	0.0205856	-1.99851	-0.0102808	1	0	0	0	0	0	0	0	0	0	0	0	0	0	0	0
Gov Eq 2 (15)	0	0	0	0	0	0	0	0	0	0	0	0	0	0	0	0	0	0	0	0	0	0	0	0	0	0	0	0	1	-21.6	-2	44.1678	1	-21.6	0	0	0	0	0	0	0	0	0	0	0	0	0	0	0
Gov Eq 1 (16)	0	0	0	0	0	0	0	0	0	0	0	0	0	0	0	0	0	0	0	0	0	0	0	0	0	0	0	0	0	0	-0.0102808	1	0.0205856	-1.99851	-0.0102808	1	0	0	0	0	0	0	0	0	0	0	0	0	0
Gov Eq 2 (16)	0	0	0	0	0	0	0	0	0	0	0	0	0	0	0	0	0	0	0	0	0	0	0	0	0	0	0	0	0	0	1	-21.6	-2	44.1678	1	-21.6	0	0	0	0	0	0	0	0	0	0	0	0	0
Gov Eq 1 (17)	0	0	0	0	0	0	0	0	0	0	0	0	0	0	0	0	0	0	0	0	0	0	0	0	0	0	0	0	0	0	0	0	-0.0102808	1	0.0205856	-1.99851	-0.0102808	1	0	0	0	0	0	0	0	0	0	0	0
Gov Eq 2 (17)	0	0	0	0	0	0	0	0	0	0	0	0	0	0	0	0	0	0	0	0	0	0	0	0	0	0	0	0	0	0	0	0	1	-21.6	-2	44.1678	1	-21.6	0	0	0	0	0	0	0	0	0	0	0
Gov Eq 1 (18)	0	0	0	0	0	0	0	0	0	0	0	0	0	0	0	0	0	0	0	0	0	0	0	0	0	0	0	0	0	0	0	0	0	0	-0.0102808	1	0.0205856	-1.99851	-0.0102808	1	0	0	0	0	0	0	0	0	0
Gov Eq 2 (18)	0	0	0	0	0	0	0	0	0	0	0	0	0	0	0	0	0	0	0	0	0	0	0	0	0	0	0	0	0	0	0	0	0	0	1	-21.6	-2	44.1678	1	-21.6	0	0	0	0	0	0	0	0	0
Gov Eq 1 (19)	0	0	0	0	0	0	0	0	0	0	0	0	0	0	0	0	0	0	0	0	0	0	0	0	0	0	0	0	0	0	0	0	0	0	0	0	-0.0102808	1	0.0205856	-1.99851	-0.0102808	1	0	0	0	0	0	0	0
Gov Eq 2 (19)	0	0	0	0	0	0	0	0	0	0	0	0	0	0	0	0	0	0	0	0	0	0	0	0	0	0	0	0	0	0	0	0	0	0	0	0	1	-21.6	-2	44.1678	1	-21.6	0	0	0	0	0	0	0
Gov Eq 1 (20)	0	0	0	0	0	0	0	0	0	0	0	0	0	0	0	0	0	0	0	0	0	0	0	0	0	0	0	0	0	0	0	0	0	0	0	0	0	0	-0.0102808	1	0.0205856	-1.99851	-0.0102808	1	0	0	0	0	0
Gov Eq 2 (20)	0	0	0	0	0	0	0	0	0	0	0	0	0	0	0	0	0	0	0	0	0	0	0	0	0	0	0	0	0	0	0	0	0	0	0	0	0	0	1	-21.6	-2	44.1678	1	-21.6	0	0	0	0	0
Gov Eq 1 (21)	0	0	0	0	0	0	0	0	0	0	0	0	0	0	0	0	0	0	0	0	0	0	0	0	0	0	0	0	0	0	0	0	0	0	0	0	0	0	0	0	-0.0102808	1	0.0205856	-1.99851	-0.0102808	1	0	0	0
Gov Eq 2 (21)	0	0	0	0	0	0	0	0	0	0	0	0	0	0	0	0	0	0	0	0	0	0	0	0	0	0	0	0	0	0	0	0	0	0	0	0	0	0	0	0	1	-21.6	-2	44.1678	1	-21.6	0	0	0
Gov Eq 1 (22)	0	0	0	0	0	0	0	0	0	0	0	0	0	0	0	0	0	0	0	0	0	0	0	0	0	0	0	0	0	0	0	0	0	0	0	0	0	0	0	0	0	0	-0.0102808	1	0.0205856	-1.99851	-0.0102808	1	0
Gov Eq 2 (22)	0	0	0	0	0	0	0	0	0	0	0	0	0	0	0	0	0	0	0	0	0	0	0	0	0	0	0	0	0	0	0	0	0	0	0	0	0	0	0	0	0	0	1	-21.6	-2	44.1678	1	-21.6	0
Gov Eq 1 (23)	0	0	0	0	0	0	0	0	0	0	0	0	0	0	0	0	0	0	0	0	0	0	0	0	0	0	0	0	0	0	0	0	0	0	0	0	0	0	0	0	0	0	0	0	-0.0102808	1	0.0205856	-1.99851	-0.0102808
Gov Eq 2 (23)	0	0	0	0	0	0	0	0	0	0	0	0	0	0	0	0	0	0	0	0	0	0	0	0	0	0	0	0	0	0	0	0	0	0	0	0	0	0	0	0	0	0	0	0	1	-21.6	-2	44.1678	1
Gov Eq 1 (24)	0	0	0	0	0	0	0	0	0	0	0	0	0	0	0	0	0	0	0	0	0	0	0	0	0	0	0	0	0	0	0	0	0	0	0	0	0	0	0	0	0	0	0	0	0	0	-0.0102808	1	0.0205856
Gov Eq 2 (24)	0	0	0	0	0	0	0	0	0	0	0	0	0	0	0	0	0	0	0	0	0	0	0	0	0	0	0	0	0	0	0	0	0	0	0	0	0	0	0	0	0	0	0	0	0	0	1	-21.6	-2
Gov Eq 1 (25)	0	0	0	0	0	0	0	0	0	0	0	0	0	0	0	0	0	0	0	0	0	0	0	0	0	0	0	0	0	0	0	0	0	0	0	0	0	0	0	0	0	0	0	0	0	0	0	0	-0.0102808
Gov Eq 2 (25)	0	0	0	0	0	0	0	0	0	0	0	0	0	0	0	0	0	0	0	0	0	0	0	0	0	0	0	0	0	0	0	0	0	0	0	0	0	0	0	0	0	0	0	0	0	0	0	0	1
Bo Co 1 (1)	0	0	1	0	0	0	0	0	0	0	0	0	0	0	0	0	0	0	0	0	0	0	0	0	0	0	0	0	0	0	0	0	0	0	0	0	0	0	0	0	0	0	0	0	0	0	0	0	0
Bo Co 2 (1)	0	0	0	1	0	0	0	0	0	0	0	0	0	0	0	0	0	0	0	0	0	0	0	0	0	0	0	0	0	0	0	0	0	0	0	0	0	0	0	0	0	0	0	0	0	0	0	0	0
Bo Co 1 (25)	0	0	0	0	0	0	0	0	0	0	0	0	0	0	0	0	0	0	0	0	0	0	0	0	0	0	0	0	0	0	0	0	0	0	0	0	0	0	0	0	0	0	0	0	0	0	0	0	0
Bo Co 2 (25)	0	0	0	0	0	0	0	0	0	0	0	0	0	0	0	0	0	0	0	0	0	0	0	0	0	0	0	0	0	0	0	0	0	0	0	0	0	0	0	0	0	0	0	0	0	0	0	0	0
		M-W FDM approximation
		Thirty three-point grid
			blk =	0.03125
						The governing equation
			a = EI/kGAl²=	0.0375
			kRI =	0.01			-1.99916
		Coefficient of axial force		-5.92176
							-0.0115735
	Winkler foundation			77.9273			77.7678
							38.4
				-0.00578297
						Determinant =	-0.000117556
				9.26835
	W0	h²M0	W1	h²M1	W2	h²M2	W3	h²M3	W4	h²M4	W5	h²M5	W6	h²M6	W7	h²M7	W8	h²M8	W9	h²M9	W10	h²M10	W11	h²M11	W12	h²M12	W13	h²M13	W14	h²M14	W15	h²M15	W16	h²M16	W17	h²M17	W18	h²M18	W19	h²M19	W20	h²M20	W21	h²M21	W22	h²M22	W23	h²M23	W24
Gov Eq 1 (1)	-0.00578297	1	0.0115735	-1.99916	-0.00578297	1	0	0	0	0	0	0	0	0	0	0	0	0	0	0	0	0	0	0	0	0	0	0	0	0	0	0	0	0	0	0	0	0	0	0	0	0	0	0	0	0	0	0	0
Gov Eq 2 (1)	1	-38.4	-2	77.7678	1	-38.4	0	0	0	0	0	0	0	0	0	0	0	0	0	0	0	0	0	0	0	0	0	0	0	0	0	0	0	0	0	0	0	0	0	0	0	0	0	0	0	0	0	0	0
Gov Eq 1 (2)	0	0	-0.00578297	1	0.0115735	-1.99916	-0.00578297	1	0	0	0	0	0	0	0	0	0	0	0	0	0	0	0	0	0	0	0	0	0	0	0	0	0	0	0	0	0	0	0	0	0	0	0	0	0	0	0	0	0
Gov Eq 2 (2)	0	0	1	-38.4	-2	77.7678	1	-38.4	0	0	0	0	0	0	0	0	0	0	0	0	0	0	0	0	0	0	0	0	0	0	0	0	0	0	0	0	0	0	0	0	0	0	0	0	0	0	0	0	0
Gov Eq 1 (3)	0	0	0	0	-0.00578297	1	0.0115735	-1.99916	-0.00578297	1	0	0	0	0	0	0	0	0	0	0	0	0	0	0	0	0	0	0	0	0	0	0	0	0	0	0	0	0	0	0	0	0	0	0	0	0	0	0	0
Gov Eq 2 (3)	0	0	0	0	1	-38.4	-2	77.7678	1	-38.4	0	0	0	0	0	0	0	0	0	0	0	0	0	0	0	0	0	0	0	0	0	0	0	0	0	0	0	0	0	0	0	0	0	0	0	0	0	0	0
Gov Eq 1 (4)	0	0	0	0	0	0	-0.00578297	1	0.0115735	-1.99916	-0.00578297	1	0	0	0	0	0	0	0	0	0	0	0	0	0	0	0	0	0	0	0	0	0	0	0	0	0	0	0	0	0	0	0	0	0	0	0	0	0
Gov Eq 2 (4)	0	0	0	0	0	0	1	-38.4	-2	77.7678	1	-38.4	0	0	0	0	0	0	0	0	0	0	0	0	0	0	0	0	0	0	0	0	0	0	0	0	0	0	0	0	0	0	0	0	0	0	0	0	0
Gov Eq 1 (5)	0	0	0	0	0	0	0	0	-0.00578297	1	0.0115735	-1.99916	-0.00578297	1	0	0	0	0	0	0	0	0	0	0	0	0	0	0	0	0	0	0	0	0	0	0	0	0	0	0	0	0	0	0	0	0	0	0	0
Gov Eq 2 (5)	0	0	0	0	0	0	0	0	1	-38.4	-2	77.7678	1	-38.4	0	0	0	0	0	0	0	0	0	0	0	0	0	0	0	0	0	0	0	0	0	0	0	0	0	0	0	0	0	0	0	0	0	0	0
Gov Eq 1 (6)	0	0	0	0	0	0	0	0	0	0	-0.00578297	1	0.0115735	-1.99916	-0.00578297	1	0	0	0	0	0	0	0	0	0	0	0	0	0	0	0	0	0	0	0	0	0	0	0	0	0	0	0	0	0	0	0	0	0
Gov Eq 2 (6)	0	0	0	0	0	0	0	0	0	0	1	-38.4	-2	77.7678	1	-38.4	0	0	0	0	0	0	0	0	0	0	0	0	0	0	0	0	0	0	0	0	0	0	0	0	0	0	0	0	0	0	0	0	0
Gov Eq 1 (7)	0	0	0	0	0	0	0	0	0	0	0	0	-0.00578297	1	0.0115735	-1.99916	-0.00578297	1	0	0	0	0	0	0	0	0	0	0	0	0	0	0	0	0	0	0	0	0	0	0	0	0	0	0	0	0	0	0	0
Gov Eq 2 (7)	0	0	0	0	0	0	0	0	0	0	0	0	1	-38.4	-2	77.7678	1	-38.4	0	0	0	0	0	0	0	0	0	0	0	0	0	0	0	0	0	0	0	0	0	0	0	0	0	0	0	0	0	0	0
Gov Eq 1 (8)	0	0	0	0	0	0	0	0	0	0	0	0	0	0	-0.00578297	1	0.0115735	-1.99916	-0.00578297	1	0	0	0	0	0	0	0	0	0	0	0	0	0	0	0	0	0	0	0	0	0	0	0	0	0	0	0	0	0
Gov Eq 2 (8)	0	0	0	0	0	0	0	0	0	0	0	0	0	0	1	-38.4	-2	77.7678	1	-38.4	0	0	0	0	0	0	0	0	0	0	0	0	0	0	0	0	0	0	0	0	0	0	0	0	0	0	0	0	0
Gov Eq 1 (9)	0	0	0	0	0	0	0	0	0	0	0	0	0	0	0	0	-0.00578297	1	0.0115735	-1.99916	-0.00578297	1	0	0	0	0	0	0	0	0	0	0	0	0	0	0	0	0	0	0	0	0	0	0	0	0	0	0	0
Gov Eq 2 (9)	0	0	0	0	0	0	0	0	0	0	0	0	0	0	0	0	1	-38.4	-2	77.7678	1	-38.4	0	0	0	0	0	0	0	0	0	0	0	0	0	0	0	0	0	0	0	0	0	0	0	0	0	0	0
Gov Eq 1 (10)	0	0	0	0	0	0	0	0	0	0	0	0	0	0	0	0	0	0	-0.00578297	1	0.0115735	-1.99916	-0.00578297	1	0	0	0	0	0	0	0	0	0	0	0	0	0	0	0	0	0	0	0	0	0	0	0	0	0
Gov Eq 2 (10)	0	0	0	0	0	0	0	0	0	0	0	0	0	0	0	0	0	0	1	-38.4	-2	77.7678	1	-38.4	0	0	0	0	0	0	0	0	0	0	0	0	0	0	0	0	0	0	0	0	0	0	0	0	0
Gov Eq 1 (11)	0	0	0	0	0	0	0	0	0	0	0	0	0	0	0	0	0	0	0	0	-0.00578297	1	0.0115735	-1.99916	-0.00578297	1	0	0	0	0	0	0	0	0	0	0	0	0	0	0	0	0	0	0	0	0	0	0	0
Gov Eq 2 (11)	0	0	0	0	0	0	0	0	0	0	0	0	0	0	0	0	0	0	0	0	1	-38.4	-2	77.7678	1	-38.4	0	0	0	0	0	0	0	0	0	0	0	0	0	0	0	0	0	0	0	0	0	0	0
Gov Eq 1 (12)	0	0	0	0	0	0	0	0	0	0	0	0	0	0	0	0	0	0	0	0	0	0	-0.00578297	1	0.0115735	-1.99916	-0.00578297	1	0	0	0	0	0	0	0	0	0	0	0	0	0	0	0	0	0	0	0	0	0
Gov Eq 2 (12)	0	0	0	0	0	0	0	0	0	0	0	0	0	0	0	0	0	0	0	0	0	0	1	-38.4	-2	77.7678	1	-38.4	0	0	0	0	0	0	0	0	0	0	0	0	0	0	0	0	0	0	0	0	0
Gov Eq 1 (13)	0	0	0	0	0	0	0	0	0	0	0	0	0	0	0	0	0	0	0	0	0	0	0	0	-0.00578297	1	0.0115735	-1.99916	-0.00578297	1	0	0	0	0	0	0	0	0	0	0	0	0	0	0	0	0	0	0	0
Gov Eq 2 (13)	0	0	0	0	0	0	0	0	0	0	0	0	0	0	0	0	0	0	0	0	0	0	0	0	1	-38.4	-2	77.7678	1	-38.4	0	0	0	0	0	0	0	0	0	0	0	0	0	0	0	0	0	0	0
Gov Eq 1 (14)	0	0	0	0	0	0	0	0	0	0	0	0	0	0	0	0	0	0	0	0	0	0	0	0	0	0	-0.00578297	1	0.0115735	-1.99916	-0.00578297	1	0	0	0	0	0	0	0	0	0	0	0	0	0	0	0	0	0
Gov Eq 2 (14)	0	0	0	0	0	0	0	0	0	0	0	0	0	0	0	0	0	0	0	0	0	0	0	0	0	0	1	-38.4	-2	77.7678	1	-38.4	0	0	0	0	0	0	0	0	0	0	0	0	0	0	0	0	0
Gov Eq 1 (15)	0	0	0	0	0	0	0	0	0	0	0	0	0	0	0	0	0	0	0	0	0	0	0	0	0	0	0	0	-0.00578297	1	0.0115735	-1.99916	-0.00578297	1	0	0	0	0	0	0	0	0	0	0	0	0	0	0	0
Gov Eq 2 (15)	0	0	0	0	0	0	0	0	0	0	0	0	0	0	0	0	0	0	0	0	0	0	0	0	0	0	0	0	1	-38.4	-2	77.7678	1	-38.4	0	0	0	0	0	0	0	0	0	0	0	0	0	0	0
Gov Eq 1 (16)	0	0	0	0	0	0	0	0	0	0	0	0	0	0	0	0	0	0	0	0	0	0	0	0	0	0	0	0	0	0	-0.00578297	1	0.0115735	-1.99916	-0.00578297	1	0	0	0	0	0	0	0	0	0	0	0	0	0
Gov Eq 2 (16)	0	0	0	0	0	0	0	0	0	0	0	0	0	0	0	0	0	0	0	0	0	0	0	0	0	0	0	0	0	0	1	-38.4	-2	77.7678	1	-38.4	0	0	0	0	0	0	0	0	0	0	0	0	0
Gov Eq 1 (17)	0	0	0	0	0	0	0	0	0	0	0	0	0	0	0	0	0	0	0	0	0	0	0	0	0	0	0	0	0	0	0	0	-0.00578297	1	0.0115735	-1.99916	-0.00578297	1	0	0	0	0	0	0	0	0	0	0	0
Gov Eq 2 (17)	0	0	0	0	0	0	0	0	0	0	0	0	0	0	0	0	0	0	0	0	0	0	0	0	0	0	0	0	0	0	0	0	1	-38.4	-2	77.7678	1	-38.4	0	0	0	0	0	0	0	0	0	0	0
Gov Eq 1 (18)	0	0	0	0	0	0	0	0	0	0	0	0	0	0	0	0	0	0	0	0	0	0	0	0	0	0	0	0	0	0	0	0	0	0	-0.00578297	1	0.0115735	-1.99916	-0.00578297	1	0	0	0	0	0	0	0	0	0
Gov Eq 2 (18)	0	0	0	0	0	0	0	0	0	0	0	0	0	0	0	0	0	0	0	0	0	0	0	0	0	0	0	0	0	0	0	0	0	0	1	-38.4	-2	77.7678	1	-38.4	0	0	0	0	0	0	0	0	0
Gov Eq 1 (19)	0	0	0	0	0	0	0	0	0	0	0	0	0	0	0	0	0	0	0	0	0	0	0	0	0	0	0	0	0	0	0	0	0	0	0	0	-0.00578297	1	0.0115735	-1.99916	-0.00578297	1	0	0	0	0	0	0	0
Gov Eq 2 (19)	0	0	0	0	0	0	0	0	0	0	0	0	0	0	0	0	0	0	0	0	0	0	0	0	0	0	0	0	0	0	0	0	0	0	0	0	1	-38.4	-2	77.7678	1	-38.4	0	0	0	0	0	0	0
Gov Eq 1 (20)	0	0	0	0	0	0	0	0	0	0	0	0	0	0	0	0	0	0	0	0	0	0	0	0	0	0	0	0	0	0	0	0	0	0	0	0	0	0	-0.00578297	1	0.0115735	-1.99916	-0.00578297	1	0	0	0	0	0
Gov Eq 2 (20)	0	0	0	0	0	0	0	0	0	0	0	0	0	0	0	0	0	0	0	0	0	0	0	0	0	0	0	0	0	0	0	0	0	0	0	0	0	0	1	-38.4	-2	77.7678	1	-38.4	0	0	0	0	0
Gov Eq 1 (21)	0	0	0	0	0	0	0	0	0	0	0	0	0	0	0	0	0	0	0	0	0	0	0	0	0	0	0	0	0	0	0	0	0	0	0	0	0	0	0	0	-0.00578297	1	0.0115735	-1.99916	-0.00578297	1	0	0	0
Gov Eq 2 (21)	0	0	0	0	0	0	0	0	0	0	0	0	0	0	0	0	0	0	0	0	0	0	0	0	0	0	0	0	0	0	0	0	0	0	0	0	0	0	0	0	1	-38.4	-2	77.7678	1	-38.4	0	0	0
Gov Eq 1 (22)	0	0	0	0	0	0	0	0	0	0	0	0	0	0	0	0	0	0	0	0	0	0	0	0	0	0	0	0	0	0	0	0	0	0	0	0	0	0	0	0	0	0	-0.00578297	1	0.0115735	-1.99916	-0.00578297	1	0
Gov Eq 2 (22)	0	0	0	0	0	0	0	0	0	0	0	0	0	0	0	0	0	0	0	0	0	0	0	0	0	0	0	0	0	0	0	0	0	0	0	0	0	0	0	0	0	0	1	-38.4	-2	77.7678	1	-38.4	0
Gov Eq 1 (23)	0	0	0	0	0	0	0	0	0	0	0	0	0	0	0	0	0	0	0	0	0	0	0	0	0	0	0	0	0	0	0	0	0	0	0	0	0	0	0	0	0	0	0	0	-0.00578297	1	0.0115735	-1.99916	-0.00578297
Gov Eq 2 (23)	0	0	0	0	0	0	0	0	0	0	0	0	0	0	0	0	0	0	0	0	0	0	0	0	0	0	0	0	0	0	0	0	0	0	0	0	0	0	0	0	0	0	0	0	1	-38.4	-2	77.7678	1
Gov Eq 1 (24)	0	0	0	0	0	0	0	0	0	0	0	0	0	0	0	0	0	0	0	0	0	0	0	0	0	0	0	0	0	0	0	0	0	0	0	0	0	0	0	0	0	0	0	0	0	0	-0.00578297	1	0.0115735
Gov Eq 2 (24)	0	0	0	0	0	0	0	0	0	0	0	0	0	0	0	0	0	0	0	0	0	0	0	0	0	0	0	0	0	0	0	0	0	0	0	0	0	0	0	0	0	0	0	0	0	0	1	-38.4	-2
Gov Eq 1 (25)	0	0	0	0	0	0	0	0	0	0	0	0	0	0	0	0	0	0	0	0	0	0	0	0	0	0	0	0	0	0	0	0	0	0	0	0	0	0	0	0	0	0	0	0	0	0	0	0	-0.00578297
Gov Eq 2 (25)	0	0	0	0	0	0	0	0	0	0	0	0	0	0	0	0	0	0	0	0	0	0	0	0	0	0	0	0	0	0	0	0	0	0	0	0	0	0	0	0	0	0	0	0	0	0	0	0	1
Gov Eq 1 (26)	0	0	0	0	0	0	0	0	0	0	0	0	0	0	0	0	0	0	0	0	0	0	0	0	0	0	0	0	0	0	0	0	0	0	0	0	0	0	0	0	0	0	0	0	0	0	0	0	0
Gov Eq 2 (26)	0	0	0	0	0	0	0	0	0	0	0	0	0	0	0	0	0	0	0	0	0	0	0	0	0	0	0	0	0	0	0	0	0	0	0	0	0	0	0	0	0	0	0	0	0	0	0	0	0
Gov Eq 1 (27)	0	0	0	0	0	0	0	0	0	0	0	0	0	0	0	0	0	0	0	0	0	0	0	0	0	0	0	0	0	0	0	0	0	0	0	0	0	0	0	0	0	0	0	0	0	0	0	0	0
Gov Eq 2 (27)	0	0	0	0	0	0	0	0	0	0	0	0	0	0	0	0	0	0	0	0	0	0	0	0	0	0	0	0	0	0	0	0	0	0	0	0	0	0	0	0	0	0	0	0	0	0	0	0	0
Gov Eq 1 (28)	0	0	0	0	0	0	0	0	0	0	0	0	0	0	0	0	0	0	0	0	0	0	0	0	0	0	0	0	0	0	0	0	0	0	0	0	0	0	0	0	0	0	0	0	0	0	0	0	0
Gov Eq 2 (28)	0	0	0	0	0	0	0	0	0	0	0	0	0	0	0	0	0	0	0	0	0	0	0	0	0	0	0	0	0	0	0	0	0	0	0	0	0	0	0	0	0	0	0	0	0	0	0	0	0
Gov Eq 1 (29)	0	0	0	0	0	0	0	0	0	0	0	0	0	0	0	0	0	0	0	0	0	0	0	0	0	0	0	0	0	0	0	0	0	0	0	0	0	0	0	0	0	0	0	0	0	0	0	0	0
Gov Eq 2 (29)	0	0	0	0	0	0	0	0	0	0	0	0	0	0	0	0	0	0	0	0	0	0	0	0	0	0	0	0	0	0	0	0	0	0	0	0	0	0	0	0	0	0	0	0	0	0	0	0	0
Gov Eq 1 (30)	0	0	0	0	0	0	0	0	0	0	0	0	0	0	0	0	0	0	0	0	0	0	0	0	0	0	0	0	0	0	0	0	0	0	0	0	0	0	0	0	0	0	0	0	0	0	0	0	0
Gov Eq 2 (30)	0	0	0	0	0	0	0	0	0	0	0	0	0	0	0	0	0	0	0	0	0	0	0	0	0	0	0	0	0	0	0	0	0	0	0	0	0	0	0	0	0	0	0	0	0	0	0	0	0
Gov Eq 1 (31)	0	0	0	0	0	0	0	0	0	0	0	0	0	0	0	0	0	0	0	0	0	0	0	0	0	0	0	0	0	0	0	0	0	0	0	0	0	0	0	0	0	0	0	0	0	0	0	0	0
Gov Eq 2 (31)	0	0	0	0	0	0	0	0	0	0	0	0	0	0	0	0	0	0	0	0	0	0	0	0	0	0	0	0	0	0	0	0	0	0	0	0	0	0	0	0	0	0	0	0	0	0	0	0	0
Gov Eq 1 (32)	0	0	0	0	0	0	0	0	0	0	0	0	0	0	0	0	0	0	0	0	0	0	0	0	0	0	0	0	0	0	0	0	0	0	0	0	0	0	0	0	0	0	0	0	0	0	0	0	0
Gov Eq 2 (32)	0	0	0	0	0	0	0	0	0	0	0	0	0	0	0	0	0	0	0	0	0	0	0	0	0	0	0	0	0	0	0	0	0	0	0	0	0	0	0	0	0	0	0	0	0	0	0	0	0
Gov Eq 1 (33)	0	0	0	0	0	0	0	0	0	0	0	0	0	0	0	0	0	0	0	0	0	0	0	0	0	0	0	0	0	0	0	0	0	0	0	0	0	0	0	0	0	0	0	0	0	0	0	0	0
Gov Eq 2 (33)	0	0	0	0	0	0	0	0	0	0	0	0	0	0	0	0	0	0	0	0	0	0	0	0	0	0	0	0	0	0	0	0	0	0	0	0	0	0	0	0	0	0	0	0	0	0	0	0	0
Bo Co 1 (1)	0	0	1	0	0	0	0	0	0	0	0	0	0	0	0	0	0	0	0	0	0	0	0	0	0	0	0	0	0	0	0	0	0	0	0	0	0	0	0	0	0	0	0	0	0	0	0	0	0
Bo Co 2 (1)	0	0	0	1	0	0	0	0	0	0	0	0	0	0	0	0	0	0	0	0	0	0	0	0	0	0	0	0	0	0	0	0	0	0	0	0	0	0	0	0	0	0	0	0	0	0	0	0	0
BoCo 1 (33)	0	0	0	0	0	0	0	0	0	0	0	0	0	0	0	0	0	0	0	0	0	0	0	0	0	0	0	0	0	0	0	0	0	0	0	0	0	0	0	0	0	0	0	0	0	0	0	0	0
BoCo 2 (33)	0	0	0	0	0	0	0	0	0	0	0	0	0	0	0	0	0	0	0	0	0	0	0	0	0	0	0	0	0	0	0	0	0	0	0	0	0	0	0	0	0	0	0	0	0	0	0	0	0
[truncated: 21 more columns]
