# Supplementary material for: Timoshenko Beam Theory:First-Order Analysis, Second-Order Analysis, Stability, and Vibration Analysis Using the Finite Difference Method
Source: Preprints.org preprint supplement (doi:10.20944/preprints202105.0252.v1), 2021-05-11
Supplement: Supplementary file 9 [file Vibration analysis of tapered Timoshenko beams.xlsx]

## Sheet: Fixed-free beam
		Vibration analysis of a tapered fixed-free Timoshenko beam
	W-F FDM approximation
		Nine-point grid
	n =	8
		0.125
					Poisson ratio:	0.3
		0.0312			Shear correction factor:	0.833333
	kRIr =	0.01
		0.500801
		3.68387				Determinant =	-0.000404555
					PSM	ABAQUS	9 pt
		0.0033132		0.212045	3.5591	3.6890	3.68387
		0.5
			Nodes	1		2		3		4		5		6		7		8		9
				0		0.125		0.25		0.375		0.5		0.625		0.75		0.875		1
				1		0.823975		0.669922		0.536377		0.421875		0.324951		0.244141		0.177979		0.125
				-0.1875		-0.164795		-0.143555		-0.123779		-0.105469		-0.088623		-0.0732422		-0.0593262		-0.046875
				1		0.9375		0.875		0.8125		0.75		0.6875		0.625		0.5625		0.5
				-0.0625		-0.0625		-0.0625		-0.0625		-0.0625		-0.0625		-0.0625		-0.0625		-0.0625
		W0	hkF0	W1	hkF1	W2	hkF2	W3	hkF3	W4	hkF4	W5	hkF5	W6	hkF6	W7	hkF7	W8	hkF8	W9	hkF9	W10	hkF10
	Gov Eq 1 (1)	0.516451	0.250401	-0.998289	0.0313001	0.485151	-0.250401	0	0	0	0	0	0	0	0	0	0	0	0	0	0	0	0
	Gov Eq 2 (1)	-0.250401	1.09375	0	-2.49868	0.250401	0.90625	0	0	0	0	0	0	0	0	0	0	0	0	0	0	0	0
	Gov Eq 1 (2)	0	0	0.485151	0.234751	-0.935896	0.0313001	0.453851	-0.234751	0	0	0	0	0	0	0	0	0	0	0	0	0	0
	Gov Eq 2 (2)	0	0	-0.234751	0.906372	0	-2.1157	0.234751	0.741577	0	0	0	0	0	0	0	0	0	0	0	0	0	0
	Gov Eq 1 (3)	0	0	0	0	0.453851	0.219101	-0.873503	0.0313001	0.422551	-0.219101	0	0	0	0	0	0	0	0	0	0	0	0
	Gov Eq 2 (3)	0	0	0	0	-0.219101	0.741699	0	-1.77662	0.219101	0.598145	0	0	0	0	0	0	0	0	0	0	0	0
	Gov Eq 1 (4)	0	0	0	0	0	0	0.422551	0.203451	-0.81111	0.0313001	0.391251	-0.203451	0	0	0	0	0	0	0	0	0	0
	Gov Eq 2 (4)	0	0	0	0	0	0	-0.203451	0.598267	0	-1.47852	0.203451	0.474487	0	0	0	0	0	0	0	0	0	0
	Gov Eq 1 (5)	0	0	0	0	0	0	0	0	0.391251	0.1878	-0.748717	0.0313001	0.359951	-0.1878	0	0	0	0	0	0	0	0
	Gov Eq 2 (5)	0	0	0	0	0	0	0	0	-0.1878	0.474609	0	-1.21846	0.1878	0.369141	0	0	0	0	0	0	0	0
	Gov Eq 1 (6)	0	0	0	0	0	0	0	0	0	0	0.359951	0.17215	-0.686324	0.0313001	0.328651	-0.17215	0	0	0	0	0	0
	Gov Eq 2 (6)	0	0	0	0	0	0	0	0	0	0	-0.17215	0.369263	0	-0.993514	0.17215	0.28064	0	0	0	0	0	0
	Gov Eq 1 (7)	0	0	0	0	0	0	0	0	0	0	0	0	0.328651	0.1565	-0.623931	0.0313001	0.297351	-0.1565	0	0	0	0
	Gov Eq 2 (7)	0	0	0	0	0	0	0	0	0	0	0	0	-0.1565	0.280762	0	-0.800764	0.1565	0.20752	0	0	0	0
	Gov Eq 1 (8)	0	0	0	0	0	0	0	0	0	0	0	0	0	0	0.297351	0.14085	-0.561538	0.0313001	0.266051	-0.14085	0	0
	Gov Eq 2 (8)	0	0	0	0	0	0	0	0	0	0	0	0	0	0	-0.14085	0.207642	0	-0.63728	0.14085	0.148315	0	0
	Gov Eq 1 (9)	0	0	0	0	0	0	0	0	0	0	0	0	0	0	0	0	0.266051	0.1252	-0.499145	0.0313001	0.234751	-0.1252
	Gov Eq 2 (9)	0	0	0	0	0	0	0	0	0	0	0	0	0	0	0	0	-0.1252	0.148438	0	-0.500136	0.1252	0.101562
	Bo Co 1 (1)	0	0	1	0	0	0	0	0	0	0	0	0	0	0	0	0	0	0	0	0	0	0
	Bo Co 2 (1)	0	0	0	1	0	0	0	0	0	0	0	0	0	0	0	0	0	0	0	0	0	0
	Bo Co 1 (9)	0	0	0	0	0	0	0	0	0	0	0	0	0	0	0	0	0	1	0	0	0	-1
	Bo Co 2 (9)	0	0	0	0	0	0	0	0	0	0	0	0	0	0	0	0	-0.5	0	0	-1	0.5	0
	W-F FDM approximation
		17-point grid
	n =	16
		0.0625
		0.0312
	kRIr =	0.01
		0.1252
		3.58946				Determinant =	5.42449e-07
					PSM	ABAQUS	9 pt	17 pt
		0.000196598		0.050329	3.5591	3.6890	3.68387	3.58946
		0.5
			Nodes	1		2		3		4		5		6		7		8		9		10		11		12		13		14		15		16		17
				0		0.0625		0.125		0.1875		0.25		0.3125		0.375		0.4375		0.5		0.5625		0.625		0.6875		0.75		0.8125		0.875		0.9375		1
				1		0.909149		0.823975		0.744293		0.669922		0.600677		0.536377		0.476837		0.421875		0.371307		0.324951		0.282623		0.244141		0.20932		0.177979		0.149933		0.125
				-0.09375		-0.0879822		-0.0823975		-0.0769958		-0.0717773		-0.0667419		-0.0618896		-0.0572205		-0.0527344		-0.0484314		-0.0443115		-0.0403748		-0.0366211		-0.0330505		-0.0296631		-0.0264587		-0.0234375
				1		0.96875		0.9375		0.90625		0.875		0.84375		0.8125		0.78125		0.75		0.71875		0.6875		0.65625		0.625		0.59375		0.5625		0.53125		0.5
				-0.03125		-0.03125		-0.03125		-0.03125		-0.03125		-0.03125		-0.03125		-0.03125		-0.03125		-0.03125		-0.03125		-0.03125		-0.03125		-0.03125		-0.03125		-0.03125		-0.03125
		W0	hkF0	W1	hkF1	W2	hkF2	W3	hkF3	W4	hkF4	W5	hkF5	W6	hkF6	W7	hkF7	W8	hkF8	W9	hkF9	W10	hkF10	W11	hkF11	W12	hkF12	W13	hkF13	W14	hkF14	W15	hkF15	W16	hkF16	W17	hkF17	W18	hkF18
	Gov Eq 1 (1)	0.127157	0.0626002	-0.250204	0.00391251	0.123244	-0.0626002	0	0	0	0	0	0	0	0	0	0	0	0	0	0	0	0	0	0	0	0	0	0	0	0	0	0	0	0	0	0	0	0
	Gov Eq 2 (1)	-0.0626002	1.04688	0	-2.1247	0.0626002	0.953125	0	0	0	0	0	0	0	0	0	0	0	0	0	0	0	0	0	0	0	0	0	0	0	0	0	0	0	0	0	0	0	0
	Gov Eq 1 (2)	0	0	0.123244	0.0606439	-0.242385	0.00391251	0.119332	-0.0606439	0	0	0	0	0	0	0	0	0	0	0	0	0	0	0	0	0	0	0	0	0	0	0	0	0	0	0	0	0	0
	Gov Eq 2 (2)	0	0	-0.0606439	0.95314	0	-1.93913	0.0606439	0.865158	0	0	0	0	0	0	0	0	0	0	0	0	0	0	0	0	0	0	0	0	0	0	0	0	0	0	0	0	0	0
	Gov Eq 1 (3)	0	0	0	0	0.119332	0.0586877	-0.234566	0.00391251	0.115419	-0.0586877	0	0	0	0	0	0	0	0	0	0	0	0	0	0	0	0	0	0	0	0	0	0	0	0	0	0	0	0
	Gov Eq 2 (3)	0	0	0	0	-0.0586877	0.865173	0	-1.76491	0.0586877	0.782776	0	0	0	0	0	0	0	0	0	0	0	0	0	0	0	0	0	0	0	0	0	0	0	0	0	0	0	0
	Gov Eq 1 (4)	0	0	0	0	0	0	0.115419	0.0567314	-0.226747	0.00391251	0.111507	-0.0567314	0	0	0	0	0	0	0	0	0	0	0	0	0	0	0	0	0	0	0	0	0	0	0	0	0	0
	Gov Eq 2 (4)	0	0	0	0	0	0	-0.0567314	0.782791	0	-1.60167	0.0567314	0.705795	0	0	0	0	0	0	0	0	0	0	0	0	0	0	0	0	0	0	0	0	0	0	0	0	0	0
	Gov Eq 1 (5)	0	0	0	0	0	0	0	0	0.111507	0.0547751	-0.218929	0.00391251	0.107594	-0.0547751	0	0	0	0	0	0	0	0	0	0	0	0	0	0	0	0	0	0	0	0	0	0	0	0
	Gov Eq 2 (5)	0	0	0	0	0	0	0	0	-0.0547751	0.705811	0	-1.44906	0.0547751	0.634033	0	0	0	0	0	0	0	0	0	0	0	0	0	0	0	0	0	0	0	0	0	0	0	0
	Gov Eq 1 (6)	0	0	0	0	0	0	0	0	0	0	0.107594	0.0528189	-0.21111	0.00391251	0.103682	-0.0528189	0	0	0	0	0	0	0	0	0	0	0	0	0	0	0	0	0	0	0	0	0	0
	Gov Eq 2 (6)	0	0	0	0	0	0	0	0	0	0	-0.0528189	0.634048	0	-1.30669	0.0528189	0.567307	0	0	0	0	0	0	0	0	0	0	0	0	0	0	0	0	0	0	0	0	0	0
	Gov Eq 1 (7)	0	0	0	0	0	0	0	0	0	0	0	0	0.103682	0.0508626	-0.203291	0.00391251	0.099769	-0.0508626	0	0	0	0	0	0	0	0	0	0	0	0	0	0	0	0	0	0	0	0
	Gov Eq 2 (7)	0	0	0	0	0	0	0	0	0	0	0	0	-0.0508626	0.567322	0	-1.17421	0.0508626	0.505432	0	0	0	0	0	0	0	0	0	0	0	0	0	0	0	0	0	0	0	0
	Gov Eq 1 (8)	0	0	0	0	0	0	0	0	0	0	0	0	0	0	0.099769	0.0489064	-0.195472	0.00391251	0.0958565	-0.0489064	0	0	0	0	0	0	0	0	0	0	0	0	0	0	0	0	0	0
	Gov Eq 2 (8)	0	0	0	0	0	0	0	0	0	0	0	0	0	0	-0.0489064	0.505447	0	-1.05125	0.0489064	0.448227	0	0	0	0	0	0	0	0	0	0	0	0	0	0	0	0	0	0
	Gov Eq 1 (9)	0	0	0	0	0	0	0	0	0	0	0	0	0	0	0	0	0.0958565	0.0469501	-0.187653	0.00391251	0.091944	-0.0469501	0	0	0	0	0	0	0	0	0	0	0	0	0	0	0	0
	Gov Eq 2 (9)	0	0	0	0	0	0	0	0	0	0	0	0	0	0	0	0	-0.0469501	0.448242	0	-0.937438	0.0469501	0.395508	0	0	0	0	0	0	0	0	0	0	0	0	0	0	0	0
	Gov Eq 1 (10)	0	0	0	0	0	0	0	0	0	0	0	0	0	0	0	0	0	0	0.091944	0.0449939	-0.179834	0.00391251	0.0880315	-0.0449939	0	0	0	0	0	0	0	0	0	0	0	0	0	0
	Gov Eq 2 (10)	0	0	0	0	0	0	0	0	0	0	0	0	0	0	0	0	0	0	-0.0449939	0.395523	0	-0.832416	0.0449939	0.347092	0	0	0	0	0	0	0	0	0	0	0	0	0	0
	Gov Eq 1 (11)	0	0	0	0	0	0	0	0	0	0	0	0	0	0	0	0	0	0	0	0	0.0880315	0.0430376	-0.172015	0.00391251	0.084119	-0.0430376	0	0	0	0	0	0	0	0	0	0	0	0
	Gov Eq 2 (11)	0	0	0	0	0	0	0	0	0	0	0	0	0	0	0	0	0	0	0	0	-0.0430376	0.347107	0	-0.735814	0.0430376	0.302795	0	0	0	0	0	0	0	0	0	0	0	0
	Gov Eq 1 (12)	0	0	0	0	0	0	0	0	0	0	0	0	0	0	0	0	0	0	0	0	0	0	0.084119	0.0410814	-0.164196	0.00391251	0.0802065	-0.0410814	0	0	0	0	0	0	0	0	0	0
	Gov Eq 2 (12)	0	0	0	0	0	0	0	0	0	0	0	0	0	0	0	0	0	0	0	0	0	0	-0.0410814	0.302811	0	-0.647267	0.0410814	0.262436	0	0	0	0	0	0	0	0	0	0
	Gov Eq 1 (13)	0	0	0	0	0	0	0	0	0	0	0	0	0	0	0	0	0	0	0	0	0	0	0	0	0.0802065	0.0391251	-0.156378	0.00391251	0.0762939	-0.0391251	0	0	0	0	0	0	0	0
	Gov Eq 2 (13)	0	0	0	0	0	0	0	0	0	0	0	0	0	0	0	0	0	0	0	0	0	0	0	0	-0.0391251	0.262451	0	-0.566409	0.0391251	0.22583	0	0	0	0	0	0	0	0
	Gov Eq 1 (14)	0	0	0	0	0	0	0	0	0	0	0	0	0	0	0	0	0	0	0	0	0	0	0	0	0	0	0.0762939	0.0371688	-0.148559	0.00391251	0.0723814	-0.0371688	0	0	0	0	0	0
	Gov Eq 2 (14)	0	0	0	0	0	0	0	0	0	0	0	0	0	0	0	0	0	0	0	0	0	0	0	0	0	0	-0.0371688	0.225845	0	-0.492872	0.0371688	0.192795	0	0	0	0	0	0
	Gov Eq 1 (15)	0	0	0	0	0	0	0	0	0	0	0	0	0	0	0	0	0	0	0	0	0	0	0	0	0	0	0	0	0.0723814	0.0352126	-0.14074	0.00391251	0.0684689	-0.0352126	0	0	0	0
	Gov Eq 2 (15)	0	0	0	0	0	0	0	0	0	0	0	0	0	0	0	0	0	0	0	0	0	0	0	0	0	0	0	0	-0.0352126	0.19281	0	-0.426293	0.0352126	0.163147	0	0	0	0
	Gov Eq 1 (16)	0	0	0	0	0	0	0	0	0	0	0	0	0	0	0	0	0	0	0	0	0	0	0	0	0	0	0	0	0	0	0.0684689	0.0332563	-0.132921	0.00391251	0.0645564	-0.0332563	0	0
	Gov Eq 2 (16)	0	0	0	0	0	0	0	0	0	0	0	0	0	0	0	0	0	0	0	0	0	0	0	0	0	0	0	0	0	0	-0.0332563	0.163162	0	-0.366303	0.0332563	0.136703	0	0
	Gov Eq 1 (17)	0	0	0	0	0	0	0	0	0	0	0	0	0	0	0	0	0	0	0	0	0	0	0	0	0	0	0	0	0	0	0	0	0.0645564	0.0313001	-0.125102	0.00391251	0.0606439	-0.0313001
	Gov Eq 2 (17)	0	0	0	0	0	0	0	0	0	0	0	0	0	0	0	0	0	0	0	0	0	0	0	0	0	0	0	0	0	0	0	0	-0.0313001	0.136719	0	-0.312537	0.0313001	0.113281
	Bo Co 1 (1)	0	0	1	0	0	0	0	0	0	0	0	0	0	0	0	0	0	0	0	0	0	0	0	0	0	0	0	0	0	0	0	0	0	0	0	0	0	0
	Bo Co 2 (1)	0	0	0	1	0	0	0	0	0	0	0	0	0	0	0	0	0	0	0	0	0	0	0	0	0	0	0	0	0	0	0	0	0	0	0	0	0	0
	Bo Co 1 (17)	0	0	0	0	0	0	0	0	0	0	0	0	0	0	0	0	0	0	0	0	0	0	0	0	0	0	0	0	0	0	0	0	0	1	0	0	0	-1
	Bo Co 2 (17)	0	0	0	0	0	0	0	0	0	0	0	0	0	0	0	0	0	0	0	0	0	0	0	0	0	0	0	0	0	0	0	0	-0.5	0	0	-1	0.5	0
	W-F FDM approximation
		25-point grid
	n =	24
		0.0416667
		0.0312
	kRIr =	0.01
		0.0556446
		3.57249				Determinant =	2.57564e-07
					PSM	ABAQUS	9 pt	17 pt	25 pt
		3.84678e-05		0.0221574	3.5591	3.6890	3.68387	3.58946	3.57249
		0.5
			Nodes	1		2		3		4		5		6		7		8		9		10		11		12		13		14		15		16		17		18		19		20		21		22		23
				0		0.0416667		0.0833333		0.125		0.166667		0.208333		0.25		0.291667		0.333333		0.375		0.416667		0.458333		0.5		0.541667		0.583333		0.625		0.666667		0.708333		0.75		0.791667		0.833333		0.875		0.916667
				1		0.938793		0.880136		0.823975		0.770255		0.718922		0.669922		0.623201		0.578704		0.536377		0.496166		0.458017		0.421875		0.387686		0.355396		0.324951		0.296296		0.269378		0.244141		0.220531		0.198495		0.177979		0.158927
				-0.0625		-0.059923		-0.0574002		-0.0549316		-0.0525174		-0.0501573		-0.0478516		-0.0456		-0.0434028		-0.0412598		-0.039171		-0.0371365		-0.0351562		-0.0332303		-0.0313585		-0.029541		-0.0277778		-0.0260688		-0.0244141		-0.0228136		-0.0212674		-0.0197754		-0.0183377
				1		0.979167		0.958333		0.9375		0.916667		0.895833		0.875		0.854167		0.833333		0.8125		0.791667		0.770833		0.75		0.729167		0.708333		0.6875		0.666667		0.645833		0.625		0.604167		0.583333		0.5625		0.541667
				-0.0208333		-0.0208333		-0.0208333		-0.0208333		-0.0208333		-0.0208333		-0.0208333		-0.0208333		-0.0208333		-0.0208333		-0.0208333		-0.0208333		-0.0208333		-0.0208333		-0.0208333		-0.0208333		-0.0208333		-0.0208333		-0.0208333		-0.0208333		-0.0208333		-0.0208333		-0.0208333
		W0	hkF0	W1	hkF1	W2	hkF2	W3	hkF3	W4	hkF4	W5	hkF5	W6	hkF6	W7	hkF7	W8	hkF8	W9	hkF9	W10	hkF10	W11	hkF11	W12	hkF12	W13	hkF13	W14	hkF14	W15	hkF15	W16	hkF16	W17	hkF17	W18	hkF18	W19	hkF19	W20	hkF20	W21	hkF21	W22	hkF22	W23	hkF23
	Gov Eq 1 (1)	0.0562242	0.0278223	-0.111251	0.00115926	0.055065	-0.0278223	0	0	0	0	0	0	0	0	0	0	0	0	0	0	0	0	0	0	0	0	0	0	0	0	0	0	0	0	0	0	0	0	0	0	0	0	0	0	0	0	0	0
	Gov Eq 2 (1)	-0.0278223	1.03125	0	-2.05542	0.0278223	0.96875	0	0	0	0	0	0	0	0	0	0	0	0	0	0	0	0	0	0	0	0	0	0	0	0	0	0	0	0	0	0	0	0	0	0	0	0	0	0	0	0	0	0
	Gov Eq 1 (2)	0	0	0.055065	0.0272427	-0.108933	0.00115926	0.0539057	-0.0272427	0	0	0	0	0	0	0	0	0	0	0	0	0	0	0	0	0	0	0	0	0	0	0	0	0	0	0	0	0	0	0	0	0	0	0	0	0	0	0	0
	Gov Eq 2 (2)	0	0	-0.0272427	0.968755	0	-1.93186	0.0272427	0.908832	0	0	0	0	0	0	0	0	0	0	0	0	0	0	0	0	0	0	0	0	0	0	0	0	0	0	0	0	0	0	0	0	0	0	0	0	0	0	0	0
	Gov Eq 1 (3)	0	0	0	0	0.0539057	0.026663	-0.106615	0.00115926	0.0527464	-0.026663	0	0	0	0	0	0	0	0	0	0	0	0	0	0	0	0	0	0	0	0	0	0	0	0	0	0	0	0	0	0	0	0	0	0	0	0	0	0
	Gov Eq 2 (3)	0	0	0	0	-0.026663	0.908836	0	-1.8134	0.026663	0.851436	0	0	0	0	0	0	0	0	0	0	0	0	0	0	0	0	0	0	0	0	0	0	0	0	0	0	0	0	0	0	0	0	0	0	0	0	0	0
	Gov Eq 1 (4)	0	0	0	0	0	0	0.0527464	0.0260834	-0.104298	0.00115926	0.0515872	-0.0260834	0	0	0	0	0	0	0	0	0	0	0	0	0	0	0	0	0	0	0	0	0	0	0	0	0	0	0	0	0	0	0	0	0	0	0	0
	Gov Eq 2 (4)	0	0	0	0	0	0	-0.0260834	0.85144	0	-1.69993	0.0260834	0.796509	0	0	0	0	0	0	0	0	0	0	0	0	0	0	0	0	0	0	0	0	0	0	0	0	0	0	0	0	0	0	0	0	0	0	0	0
	Gov Eq 1 (5)	0	0	0	0	0	0	0	0	0.0515872	0.0255038	-0.10198	0.00115926	0.0504279	-0.0255038	0	0	0	0	0	0	0	0	0	0	0	0	0	0	0	0	0	0	0	0	0	0	0	0	0	0	0	0	0	0	0	0	0	0
	Gov Eq 2 (5)	0	0	0	0	0	0	0	0	-0.0255038	0.796513	0	-1.59135	0.0255038	0.743996	0	0	0	0	0	0	0	0	0	0	0	0	0	0	0	0	0	0	0	0	0	0	0	0	0	0	0	0	0	0	0	0	0	0
	Gov Eq 1 (6)	0	0	0	0	0	0	0	0	0	0	0.0504279	0.0249241	-0.0996621	0.00115926	0.0492686	-0.0249241	0	0	0	0	0	0	0	0	0	0	0	0	0	0	0	0	0	0	0	0	0	0	0	0	0	0	0	0	0	0	0	0
	Gov Eq 2 (6)	0	0	0	0	0	0	0	0	0	0	-0.0249241	0.744	0	-1.48753	0.0249241	0.693843	0	0	0	0	0	0	0	0	0	0	0	0	0	0	0	0	0	0	0	0	0	0	0	0	0	0	0	0	0	0	0	0
	Gov Eq 1 (7)	0	0	0	0	0	0	0	0	0	0	0	0	0.0492686	0.0243445	-0.0973444	0.00115926	0.0481094	-0.0243445	0	0	0	0	0	0	0	0	0	0	0	0	0	0	0	0	0	0	0	0	0	0	0	0	0	0	0	0	0	0
	Gov Eq 2 (7)	0	0	0	0	0	0	0	0	0	0	0	0	-0.0243445	0.693848	0	-1.38838	0.0243445	0.645996	0	0	0	0	0	0	0	0	0	0	0	0	0	0	0	0	0	0	0	0	0	0	0	0	0	0	0	0	0	0
	Gov Eq 1 (8)	0	0	0	0	0	0	0	0	0	0	0	0	0	0	0.0481094	0.0237649	-0.0950266	0.00115926	0.0469501	-0.0237649	0	0	0	0	0	0	0	0	0	0	0	0	0	0	0	0	0	0	0	0	0	0	0	0	0	0	0	0
	Gov Eq 2 (8)	0	0	0	0	0	0	0	0	0	0	0	0	0	0	-0.0237649	0.646001	0	-1.29379	0.0237649	0.600401	0	0	0	0	0	0	0	0	0	0	0	0	0	0	0	0	0	0	0	0	0	0	0	0	0	0	0	0
	Gov Eq 1 (9)	0	0	0	0	0	0	0	0	0	0	0	0	0	0	0	0	0.0469501	0.0231852	-0.0927089	0.00115926	0.0457909	-0.0231852	0	0	0	0	0	0	0	0	0	0	0	0	0	0	0	0	0	0	0	0	0	0	0	0	0	0
	Gov Eq 2 (9)	0	0	0	0	0	0	0	0	0	0	0	0	0	0	0	0	-0.0231852	0.600405	0	-1.20365	0.0231852	0.557002	0	0	0	0	0	0	0	0	0	0	0	0	0	0	0	0	0	0	0	0	0	0	0	0	0	0
	Gov Eq 1 (10)	0	0	0	0	0	0	0	0	0	0	0	0	0	0	0	0	0	0	0.0457909	0.0226056	-0.0903912	0.00115926	0.0446316	-0.0226056	0	0	0	0	0	0	0	0	0	0	0	0	0	0	0	0	0	0	0	0	0	0	0	0
	Gov Eq 2 (10)	0	0	0	0	0	0	0	0	0	0	0	0	0	0	0	0	0	0	-0.0226056	0.557007	0	-1.11785	0.0226056	0.515747	0	0	0	0	0	0	0	0	0	0	0	0	0	0	0	0	0	0	0	0	0	0	0	0
	Gov Eq 1 (11)	0	0	0	0	0	0	0	0	0	0	0	0	0	0	0	0	0	0	0	0	0.0446316	0.022026	-0.0880735	0.00115926	0.0434723	-0.022026	0	0	0	0	0	0	0	0	0	0	0	0	0	0	0	0	0	0	0	0	0	0
	Gov Eq 2 (11)	0	0	0	0	0	0	0	0	0	0	0	0	0	0	0	0	0	0	0	0	-0.022026	0.515752	0	-1.03627	0.022026	0.476581	0	0	0	0	0	0	0	0	0	0	0	0	0	0	0	0	0	0	0	0	0	0
	Gov Eq 1 (12)	0	0	0	0	0	0	0	0	0	0	0	0	0	0	0	0	0	0	0	0	0	0	0.0434723	0.0214464	-0.0857558	0.00115926	0.0423131	-0.0214464	0	0	0	0	0	0	0	0	0	0	0	0	0	0	0	0	0	0	0	0
	Gov Eq 2 (12)	0	0	0	0	0	0	0	0	0	0	0	0	0	0	0	0	0	0	0	0	0	0	-0.0214464	0.476585	0	-0.958825	0.0214464	0.439449	0	0	0	0	0	0	0	0	0	0	0	0	0	0	0	0	0	0	0	0
	Gov Eq 1 (13)	0	0	0	0	0	0	0	0	0	0	0	0	0	0	0	0	0	0	0	0	0	0	0	0	0.0423131	0.0208667	-0.083438	0.00115926	0.0411538	-0.0208667	0	0	0	0	0	0	0	0	0	0	0	0	0	0	0	0	0	0
	Gov Eq 2 (13)	0	0	0	0	0	0	0	0	0	0	0	0	0	0	0	0	0	0	0	0	0	0	0	0	-0.0208667	0.439453	0	-0.88539	0.0208667	0.404297	0	0	0	0	0	0	0	0	0	0	0	0	0	0	0	0	0	0
	Gov Eq 1 (14)	0	0	0	0	0	0	0	0	0	0	0	0	0	0	0	0	0	0	0	0	0	0	0	0	0	0	0.0411538	0.0202871	-0.0811203	0.00115926	0.0399945	-0.0202871	0	0	0	0	0	0	0	0	0	0	0	0	0	0	0	0
	Gov Eq 2 (14)	0	0	0	0	0	0	0	0	0	0	0	0	0	0	0	0	0	0	0	0	0	0	0	0	0	0	-0.0202871	0.404301	0	-0.815861	0.0202871	0.371071	0	0	0	0	0	0	0	0	0	0	0	0	0	0	0	0
	Gov Eq 1 (15)	0	0	0	0	0	0	0	0	0	0	0	0	0	0	0	0	0	0	0	0	0	0	0	0	0	0	0	0	0.0399945	0.0197075	-0.0788026	0.00115926	0.0388353	-0.0197075	0	0	0	0	0	0	0	0	0	0	0	0	0	0
	Gov Eq 2 (15)	0	0	0	0	0	0	0	0	0	0	0	0	0	0	0	0	0	0	0	0	0	0	0	0	0	0	0	0	-0.0197075	0.371076	0	-0.750129	0.0197075	0.339717	0	0	0	0	0	0	0	0	0	0	0	0	0	0
	Gov Eq 1 (16)	0	0	0	0	0	0	0	0	0	0	0	0	0	0	0	0	0	0	0	0	0	0	0	0	0	0	0	0	0	0	0.0388353	0.0191278	-0.0764849	0.00115926	0.037676	-0.0191278	0	0	0	0	0	0	0	0	0	0	0	0
	Gov Eq 2 (16)	0	0	0	0	0	0	0	0	0	0	0	0	0	0	0	0	0	0	0	0	0	0	0	0	0	0	0	0	0	0	-0.0191278	0.339722	0	-0.688086	0.0191278	0.310181	0	0	0	0	0	0	0	0	0	0	0	0
	Gov Eq 1 (17)	0	0	0	0	0	0	0	0	0	0	0	0	0	0	0	0	0	0	0	0	0	0	0	0	0	0	0	0	0	0	0	0	0.037676	0.0185482	-0.0741671	0.00115926	0.0365168	-0.0185482	0	0	0	0	0	0	0	0	0	0
	Gov Eq 2 (17)	0	0	0	0	0	0	0	0	0	0	0	0	0	0	0	0	0	0	0	0	0	0	0	0	0	0	0	0	0	0	0	0	-0.0185482	0.310185	0	-0.629623	0.0185482	0.282407	0	0	0	0	0	0	0	0	0	0
	Gov Eq 1 (18)	0	0	0	0	0	0	0	0	0	0	0	0	0	0	0	0	0	0	0	0	0	0	0	0	0	0	0	0	0	0	0	0	0	0	0.0365168	0.0179686	-0.0718494	0.00115926	0.0353575	-0.0179686	0	0	0	0	0	0	0	0
	Gov Eq 2 (18)	0	0	0	0	0	0	0	0	0	0	0	0	0	0	0	0	0	0	0	0	0	0	0	0	0	0	0	0	0	0	0	0	0	0	-0.0179686	0.282412	0	-0.574633	0.0179686	0.256343	0	0	0	0	0	0	0	0
	Gov Eq 1 (19)	0	0	0	0	0	0	0	0	0	0	0	0	0	0	0	0	0	0	0	0	0	0	0	0	0	0	0	0	0	0	0	0	0	0	0	0	0.0353575	0.0173889	-0.0695317	0.00115926	0.0341982	-0.0173889	0	0	0	0	0	0
	Gov Eq 2 (19)	0	0	0	0	0	0	0	0	0	0	0	0	0	0	0	0	0	0	0	0	0	0	0	0	0	0	0	0	0	0	0	0	0	0	0	0	-0.0173889	0.256348	0	-0.523005	0.0173889	0.231934	0	0	0	0	0	0
	Gov Eq 1 (20)	0	0	0	0	0	0	0	0	0	0	0	0	0	0	0	0	0	0	0	0	0	0	0	0	0	0	0	0	0	0	0	0	0	0	0	0	0	0	0.0341982	0.0168093	-0.067214	0.00115926	0.033039	-0.0168093	0	0	0	0
	Gov Eq 2 (20)	0	0	0	0	0	0	0	0	0	0	0	0	0	0	0	0	0	0	0	0	0	0	0	0	0	0	0	0	0	0	0	0	0	0	0	0	0	0	-0.0168093	0.231938	0	-0.474632	0.0168093	0.209125	0	0	0	0
	Gov Eq 1 (21)	0	0	0	0	0	0	0	0	0	0	0	0	0	0	0	0	0	0	0	0	0	0	0	0	0	0	0	0	0	0	0	0	0	0	0	0	0	0	0	0	0.033039	0.0162297	-0.0648962	0.00115926	0.0318797	-0.0162297	0	0
	Gov Eq 2 (21)	0	0	0	0	0	0	0	0	0	0	0	0	0	0	0	0	0	0	0	0	0	0	0	0	0	0	0	0	0	0	0	0	0	0	0	0	0	0	0	0	-0.0162297	0.209129	0	-0.429406	0.0162297	0.187862	0	0
	Gov Eq 1 (22)	0	0	0	0	0	0	0	0	0	0	0	0	0	0	0	0	0	0	0	0	0	0	0	0	0	0	0	0	0	0	0	0	0	0	0	0	0	0	0	0	0	0	0.0318797	0.01565	-0.0625785	0.00115926	0.0307204	-0.01565
	Gov Eq 2 (22)	0	0	0	0	0	0	0	0	0	0	0	0	0	0	0	0	0	0	0	0	0	0	0	0	0	0	0	0	0	0	0	0	0	0	0	0	0	0	0	0	0	0	-0.01565	0.187866	0	-0.387218	0.01565	0.168091
	Gov Eq 1 (23)	0	0	0	0	0	0	0	0	0	0	0	0	0	0	0	0	0	0	0	0	0	0	0	0	0	0	0	0	0	0	0	0	0	0	0	0	0	0	0	0	0	0	0	0	0.0307204	0.0150704	-0.0602608	0.00115926
	Gov Eq 2 (23)	0	0	0	0	0	0	0	0	0	0	0	0	0	0	0	0	0	0	0	0	0	0	0	0	0	0	0	0	0	0	0	0	0	0	0	0	0	0	0	0	0	0	0	0	-0.0150704	0.168095	0	-0.347959
	Gov Eq 1 (24)	0	0	0	0	0	0	0	0	0	0	0	0	0	0	0	0	0	0	0	0	0	0	0	0	0	0	0	0	0	0	0	0	0	0	0	0	0	0	0	0	0	0	0	0	0	0	0.0295612	0.0144908
	Gov Eq 2 (24)	0	0	0	0	0	0	0	0	0	0	0	0	0	0	0	0	0	0	0	0	0	0	0	0	0	0	0	0	0	0	0	0	0	0	0	0	0	0	0	0	0	0	0	0	0	0	-0.0144908	0.149762
	Gov Eq 1 (25)	0	0	0	0	0	0	0	0	0	0	0	0	0	0	0	0	0	0	0	0	0	0	0	0	0	0	0	0	0	0	0	0	0	0	0	0	0	0	0	0	0	0	0	0	0	0	0	0
	Gov Eq 2 (25)	0	0	0	0	0	0	0	0	0	0	0	0	0	0	0	0	0	0	0	0	0	0	0	0	0	0	0	0	0	0	0	0	0	0	0	0	0	0	0	0	0	0	0	0	0	0	0	0
	Bo Co 1 (1)	0	0	1	0	0	0	0	0	0	0	0	0	0	0	0	0	0	0	0	0	0	0	0	0	0	0	0	0	0	0	0	0	0	0	0	0	0	0	0	0	0	0	0	0	0	0	0	0
	Bo Co 2 (1)	0	0	0	1	0	0	0	0	0	0	0	0	0	0	0	0	0	0	0	0	0	0	0	0	0	0	0	0	0	0	0	0	0	0	0	0	0	0	0	0	0	0	0	0	0	0	0	0
	Bo Co 1 (25)	0	0	0	0	0	0	0	0	0	0	0	0	0	0	0	0	0	0	0	0	0	0	0	0	0	0	0	0	0	0	0	0	0	0	0	0	0	0	0	0	0	0	0	0	0	0	0	0
	Bo Co 2 (25)	0	0	0	0	0	0	0	0	0	0	0	0	0	0	0	0	0	0	0	0	0	0	0	0	0	0	0	0	0	0	0	0	0	0	0	0	0	0	0	0	0	0	0	0	0	0	0	0
	W-F FDM approximation
		33-point grid
	n =	32
		0.03125
		0.0312
	kRIr =	0.01
		0.0313001
		3.56661				Determinant =	-8.24747e-05
					PSM	ABAQUS	9 pt	17 pt	25 pt	33 pt
		1.21314e-05		0.0124225	3.5591	3.6890	3.68387	3.58946	3.57249	3.56661
		0.5
			Nodes	1		2		3		4		5		6		7		8		9		10		11		12		13		14		15		16		17		18		19		20		21		22		23
				0		0.03125		0.0625		0.09375		0.125		0.15625		0.1875		0.21875		0.25		0.28125		0.3125		0.34375		0.375		0.40625		0.4375		0.46875		0.5		0.53125		0.5625		0.59375		0.625		0.65625		0.6875
				1		0.953854		0.909149		0.865864		0.823975		0.783459		0.744293		0.706455		0.669922		0.63467		0.600677		0.567921		0.536377		0.506023		0.476837		0.448795		0.421875		0.396053		0.371307		0.347614		0.324951		0.303295		0.282623
				-0.046875		-0.0454216		-0.0439911		-0.0425835		-0.0411987		-0.0398369		-0.0384979		-0.0371819		-0.0358887		-0.0346184		-0.033371		-0.0321465		-0.0309448		-0.0297661		-0.0286102		-0.0274773		-0.0263672		-0.02528		-0.0242157		-0.0231743		-0.0221558		-0.0211601		-0.0201874
				1		0.984375		0.96875		0.953125		0.9375		0.921875		0.90625		0.890625		0.875		0.859375		0.84375		0.828125		0.8125		0.796875		0.78125		0.765625		0.75		0.734375		0.71875		0.703125		0.6875		0.671875		0.65625
				-0.015625		-0.015625		-0.015625		-0.015625		-0.015625		-0.015625		-0.015625		-0.015625		-0.015625		-0.015625		-0.015625		-0.015625		-0.015625		-0.015625		-0.015625		-0.015625		-0.015625		-0.015625		-0.015625		-0.015625		-0.015625		-0.015625		-0.015625
		W0	hkF0	W1	hkF1	W2	hkF2	W3	hkF3	W4	hkF4	W5	hkF5	W6	hkF6	W7	hkF7	W8	hkF8	W9	hkF9	W10	hkF10	W11	hkF11	W12	hkF12	W13	hkF13	W14	hkF14	W15	hkF15	W16	hkF16	W17	hkF17	W18	hkF18	W19	hkF19	W20	hkF20	W21	hkF21	W22	hkF22	W23	hkF23
	Gov Eq 1 (1)	0.0315446	0.01565	-0.062588	0.000489064	0.0310555	-0.01565	0	0	0	0	0	0	0	0	0	0	0	0	0	0	0	0	0	0	0	0	0	0	0	0	0	0	0	0	0	0	0	0	0	0	0	0	0	0	0	0	0	0
	Gov Eq 2 (1)	-0.01565	1.02344	0	-2.03118	0.01565	0.976562	0	0	0	0	0	0	0	0	0	0	0	0	0	0	0	0	0	0	0	0	0	0	0	0	0	0	0	0	0	0	0	0	0	0	0	0	0	0	0	0	0	0
	Gov Eq 1 (2)	0	0	0.0310555	0.0154055	-0.0616101	0.000489064	0.0305665	-0.0154055	0	0	0	0	0	0	0	0	0	0	0	0	0	0	0	0	0	0	0	0	0	0	0	0	0	0	0	0	0	0	0	0	0	0	0	0	0	0	0	0
	Gov Eq 2 (2)	0	0	-0.0154055	0.976564	0	-1.9384	0.0154055	0.931143	0	0	0	0	0	0	0	0	0	0	0	0	0	0	0	0	0	0	0	0	0	0	0	0	0	0	0	0	0	0	0	0	0	0	0	0	0	0	0	0
	Gov Eq 1 (3)	0	0	0	0	0.0305665	0.015161	-0.0606322	0.000489064	0.0300774	-0.015161	0	0	0	0	0	0	0	0	0	0	0	0	0	0	0	0	0	0	0	0	0	0	0	0	0	0	0	0	0	0	0	0	0	0	0	0	0	0
	Gov Eq 2 (3)	0	0	0	0	-0.015161	0.931145	0	-1.84851	0.015161	0.887154	0	0	0	0	0	0	0	0	0	0	0	0	0	0	0	0	0	0	0	0	0	0	0	0	0	0	0	0	0	0	0	0	0	0	0	0	0	0
	Gov Eq 1 (4)	0	0	0	0	0	0	0.0300774	0.0149164	-0.0596542	0.000489064	0.0295884	-0.0149164	0	0	0	0	0	0	0	0	0	0	0	0	0	0	0	0	0	0	0	0	0	0	0	0	0	0	0	0	0	0	0	0	0	0	0	0
	Gov Eq 2 (4)	0	0	0	0	0	0	-0.0149164	0.887156	0	-1.76145	0.0149164	0.844572	0	0	0	0	0	0	0	0	0	0	0	0	0	0	0	0	0	0	0	0	0	0	0	0	0	0	0	0	0	0	0	0	0	0	0	0
	Gov Eq 1 (5)	0	0	0	0	0	0	0	0	0.0295884	0.0146719	-0.0586763	0.000489064	0.0290993	-0.0146719	0	0	0	0	0	0	0	0	0	0	0	0	0	0	0	0	0	0	0	0	0	0	0	0	0	0	0	0	0	0	0	0	0	0
	Gov Eq 2 (5)	0	0	0	0	0	0	0	0	-0.0146719	0.844574	0	-1.67719	0.0146719	0.803375	0	0	0	0	0	0	0	0	0	0	0	0	0	0	0	0	0	0	0	0	0	0	0	0	0	0	0	0	0	0	0	0	0	0
	Gov Eq 1 (6)	0	0	0	0	0	0	0	0	0	0	0.0290993	0.0144274	-0.0576983	0.000489064	0.0286102	-0.0144274	0	0	0	0	0	0	0	0	0	0	0	0	0	0	0	0	0	0	0	0	0	0	0	0	0	0	0	0	0	0	0	0
	Gov Eq 2 (6)	0	0	0	0	0	0	0	0	0	0	-0.0144274	0.803377	0	-1.59567	0.0144274	0.76354	0	0	0	0	0	0	0	0	0	0	0	0	0	0	0	0	0	0	0	0	0	0	0	0	0	0	0	0	0	0	0	0
	Gov Eq 1 (7)	0	0	0	0	0	0	0	0	0	0	0	0	0.0286102	0.0141828	-0.0567204	0.000489064	0.0281212	-0.0141828	0	0	0	0	0	0	0	0	0	0	0	0	0	0	0	0	0	0	0	0	0	0	0	0	0	0	0	0	0	0
	Gov Eq 2 (7)	0	0	0	0	0	0	0	0	0	0	0	0	-0.0141828	0.763542	0	-1.51686	0.0141828	0.725044	0	0	0	0	0	0	0	0	0	0	0	0	0	0	0	0	0	0	0	0	0	0	0	0	0	0	0	0	0	0
	Gov Eq 1 (8)	0	0	0	0	0	0	0	0	0	0	0	0	0	0	0.0281212	0.0139383	-0.0557425	0.000489064	0.0276321	-0.0139383	0	0	0	0	0	0	0	0	0	0	0	0	0	0	0	0	0	0	0	0	0	0	0	0	0	0	0	0
	Gov Eq 2 (8)	0	0	0	0	0	0	0	0	0	0	0	0	0	0	-0.0139383	0.725046	0	-1.4407	0.0139383	0.687864	0	0	0	0	0	0	0	0	0	0	0	0	0	0	0	0	0	0	0	0	0	0	0	0	0	0	0	0
	Gov Eq 1 (9)	0	0	0	0	0	0	0	0	0	0	0	0	0	0	0	0	0.0276321	0.0136938	-0.0547645	0.000489064	0.027143	-0.0136938	0	0	0	0	0	0	0	0	0	0	0	0	0	0	0	0	0	0	0	0	0	0	0	0	0	0
	Gov Eq 2 (9)	0	0	0	0	0	0	0	0	0	0	0	0	0	0	0	0	-0.0136938	0.687866	0	-1.36715	0.0136938	0.651978	0	0	0	0	0	0	0	0	0	0	0	0	0	0	0	0	0	0	0	0	0	0	0	0	0	0
	Gov Eq 1 (10)	0	0	0	0	0	0	0	0	0	0	0	0	0	0	0	0	0	0	0.027143	0.0134493	-0.0537866	0.000489064	0.026654	-0.0134493	0	0	0	0	0	0	0	0	0	0	0	0	0	0	0	0	0	0	0	0	0	0	0	0
	Gov Eq 2 (10)	0	0	0	0	0	0	0	0	0	0	0	0	0	0	0	0	0	0	-0.0134493	0.651979	0	-1.29616	0.0134493	0.617361	0	0	0	0	0	0	0	0	0	0	0	0	0	0	0	0	0	0	0	0	0	0	0	0
	Gov Eq 1 (11)	0	0	0	0	0	0	0	0	0	0	0	0	0	0	0	0	0	0	0	0	0.026654	0.0132047	-0.0528086	0.000489064	0.0261649	-0.0132047	0	0	0	0	0	0	0	0	0	0	0	0	0	0	0	0	0	0	0	0	0	0
	Gov Eq 2 (11)	0	0	0	0	0	0	0	0	0	0	0	0	0	0	0	0	0	0	0	0	-0.0132047	0.617363	0	-1.22769	0.0132047	0.583992	0	0	0	0	0	0	0	0	0	0	0	0	0	0	0	0	0	0	0	0	0	0
	Gov Eq 1 (12)	0	0	0	0	0	0	0	0	0	0	0	0	0	0	0	0	0	0	0	0	0	0	0.0261649	0.0129602	-0.0518307	0.000489064	0.0256758	-0.0129602	0	0	0	0	0	0	0	0	0	0	0	0	0	0	0	0	0	0	0	0
	Gov Eq 2 (12)	0	0	0	0	0	0	0	0	0	0	0	0	0	0	0	0	0	0	0	0	0	0	-0.0129602	0.583994	0	-1.16169	0.0129602	0.551847	0	0	0	0	0	0	0	0	0	0	0	0	0	0	0	0	0	0	0	0
	Gov Eq 1 (13)	0	0	0	0	0	0	0	0	0	0	0	0	0	0	0	0	0	0	0	0	0	0	0	0	0.0256758	0.0127157	-0.0508528	0.000489064	0.0251868	-0.0127157	0	0	0	0	0	0	0	0	0	0	0	0	0	0	0	0	0	0
	Gov Eq 2 (13)	0	0	0	0	0	0	0	0	0	0	0	0	0	0	0	0	0	0	0	0	0	0	0	0	-0.0127157	0.551849	0	-1.09812	0.0127157	0.520905	0	0	0	0	0	0	0	0	0	0	0	0	0	0	0	0	0	0
	Gov Eq 1 (14)	0	0	0	0	0	0	0	0	0	0	0	0	0	0	0	0	0	0	0	0	0	0	0	0	0	0	0.0251868	0.0124711	-0.0498748	0.000489064	0.0246977	-0.0124711	0	0	0	0	0	0	0	0	0	0	0	0	0	0	0	0
	Gov Eq 2 (14)	0	0	0	0	0	0	0	0	0	0	0	0	0	0	0	0	0	0	0	0	0	0	0	0	0	0	-0.0124711	0.520906	0	-1.03693	0.0124711	0.49114	0	0	0	0	0	0	0	0	0	0	0	0	0	0	0	0
	Gov Eq 1 (15)	0	0	0	0	0	0	0	0	0	0	0	0	0	0	0	0	0	0	0	0	0	0	0	0	0	0	0	0	0.0246977	0.0122266	-0.0488969	0.000489064	0.0242087	-0.0122266	0	0	0	0	0	0	0	0	0	0	0	0	0	0
	Gov Eq 2 (15)	0	0	0	0	0	0	0	0	0	0	0	0	0	0	0	0	0	0	0	0	0	0	0	0	0	0	0	0	-0.0122266	0.491142	0	-0.978068	0.0122266	0.462532	0	0	0	0	0	0	0	0	0	0	0	0	0	0
	Gov Eq 1 (16)	0	0	0	0	0	0	0	0	0	0	0	0	0	0	0	0	0	0	0	0	0	0	0	0	0	0	0	0	0	0	0.0242087	0.0119821	-0.047919	0.000489064	0.0237196	-0.0119821	0	0	0	0	0	0	0	0	0	0	0	0
	Gov Eq 2 (16)	0	0	0	0	0	0	0	0	0	0	0	0	0	0	0	0	0	0	0	0	0	0	0	0	0	0	0	0	0	0	-0.0119821	0.462534	0	-0.921499	0.0119821	0.435057	0	0	0	0	0	0	0	0	0	0	0	0
	Gov Eq 1 (17)	0	0	0	0	0	0	0	0	0	0	0	0	0	0	0	0	0	0	0	0	0	0	0	0	0	0	0	0	0	0	0	0	0.0237196	0.0117375	-0.046941	0.000489064	0.0232305	-0.0117375	0	0	0	0	0	0	0	0	0	0
	Gov Eq 2 (17)	0	0	0	0	0	0	0	0	0	0	0	0	0	0	0	0	0	0	0	0	0	0	0	0	0	0	0	0	0	0	0	0	-0.0117375	0.435059	0	-0.867173	0.0117375	0.408691	0	0	0	0	0	0	0	0	0	0
	Gov Eq 1 (18)	0	0	0	0	0	0	0	0	0	0	0	0	0	0	0	0	0	0	0	0	0	0	0	0	0	0	0	0	0	0	0	0	0	0	0.0232305	0.011493	-0.0459631	0.000489064	0.0227415	-0.011493	0	0	0	0	0	0	0	0
	Gov Eq 2 (18)	0	0	0	0	0	0	0	0	0	0	0	0	0	0	0	0	0	0	0	0	0	0	0	0	0	0	0	0	0	0	0	0	0	0	-0.011493	0.408693	0	-0.815043	0.011493	0.383413	0	0	0	0	0	0	0	0
	Gov Eq 1 (19)	0	0	0	0	0	0	0	0	0	0	0	0	0	0	0	0	0	0	0	0	0	0	0	0	0	0	0	0	0	0	0	0	0	0	0	0	0.0227415	0.0112485	-0.0449851	0.000489064	0.0222524	-0.0112485	0	0	0	0	0	0
	Gov Eq 2 (19)	0	0	0	0	0	0	0	0	0	0	0	0	0	0	0	0	0	0	0	0	0	0	0	0	0	0	0	0	0	0	0	0	0	0	0	0	-0.0112485	0.383415	0	-0.765066	0.0112485	0.3592	0	0	0	0	0	0
	Gov Eq 1 (20)	0	0	0	0	0	0	0	0	0	0	0	0	0	0	0	0	0	0	0	0	0	0	0	0	0	0	0	0	0	0	0	0	0	0	0	0	0	0	0.0222524	0.0110039	-0.0440072	0.000489064	0.0217633	-0.0110039	0	0	0	0
	Gov Eq 2 (20)	0	0	0	0	0	0	0	0	0	0	0	0	0	0	0	0	0	0	0	0	0	0	0	0	0	0	0	0	0	0	0	0	0	0	0	0	0	0	-0.0110039	0.359201	0	-0.717193	0.0110039	0.336027	0	0	0	0
	Gov Eq 1 (21)	0	0	0	0	0	0	0	0	0	0	0	0	0	0	0	0	0	0	0	0	0	0	0	0	0	0	0	0	0	0	0	0	0	0	0	0	0	0	0	0	0.0217633	0.0107594	-0.0430293	0.000489064	0.0212743	-0.0107594	0	0
	Gov Eq 2 (21)	0	0	0	0	0	0	0	0	0	0	0	0	0	0	0	0	0	0	0	0	0	0	0	0	0	0	0	0	0	0	0	0	0	0	0	0	0	0	0	0	-0.0107594	0.336029	0	-0.671381	0.0107594	0.313873	0	0
	Gov Eq 1 (22)	0	0	0	0	0	0	0	0	0	0	0	0	0	0	0	0	0	0	0	0	0	0	0	0	0	0	0	0	0	0	0	0	0	0	0	0	0	0	0	0	0	0	0.0212743	0.0105149	-0.0420513	0.000489064	0.0207852	-0.0105149
	Gov Eq 2 (22)	0	0	0	0	0	0	0	0	0	0	0	0	0	0	0	0	0	0	0	0	0	0	0	0	0	0	0	0	0	0	0	0	0	0	0	0	0	0	0	0	0	0	-0.0105149	0.313875	0	-0.627582	0.0105149	0.292715
	Gov Eq 1 (23)	0	0	0	0	0	0	0	0	0	0	0	0	0	0	0	0	0	0	0	0	0	0	0	0	0	0	0	0	0	0	0	0	0	0	0	0	0	0	0	0	0	0	0	0	0.0207852	0.0102703	-0.0410734	0.000489064
	Gov Eq 2 (23)	0	0	0	0	0	0	0	0	0	0	0	0	0	0	0	0	0	0	0	0	0	0	0	0	0	0	0	0	0	0	0	0	0	0	0	0	0	0	0	0	0	0	0	0	-0.0102703	0.292717	0	-0.585752
	Gov Eq 1 (24)	0	0	0	0	0	0	0	0	0	0	0	0	0	0	0	0	0	0	0	0	0	0	0	0	0	0	0	0	0	0	0	0	0	0	0	0	0	0	0	0	0	0	0	0	0	0	0.0202961	0.0100258
	Gov Eq 2 (24)	0	0	0	0	0	0	0	0	0	0	0	0	0	0	0	0	0	0	0	0	0	0	0	0	0	0	0	0	0	0	0	0	0	0	0	0	0	0	0	0	0	0	0	0	0	0	-0.0100258	0.272532
	Gov Eq 1 (25)	0	0	0	0	0	0	0	0	0	0	0	0	0	0	0	0	0	0	0	0	0	0	0	0	0	0	0	0	0	0	0	0	0	0	0	0	0	0	0	0	0	0	0	0	0	0	0	0
	Gov Eq 2 (25)	0	0	0	0	0	0	0	0	0	0	0	0	0	0	0	0	0	0	0	0	0	0	0	0	0	0	0	0	0	0	0	0	0	0	0	0	0	0	0	0	0	0	0	0	0	0	0	0
	Gov Eq 1 (26)	0	0	0	0	0	0	0	0	0	0	0	0	0	0	0	0	0	0	0	0	0	0	0	0	0	0	0	0	0	0	0	0	0	0	0	0	0	0	0	0	0	0	0	0	0	0	0	0
	Gov Eq 2 (26)	0	0	0	0	0	0	0	0	0	0	0	0	0	0	0	0	0	0	0	0	0	0	0	0	0	0	0	0	0	0	0	0	0	0	0	0	0	0	0	0	0	0	0	0	0	0	0	0
	Gov Eq 1 (27)	0	0	0	0	0	0	0	0	0	0	0	0	0	0	0	0	0	0	0	0	0	0	0	0	0	0	0	0	0	0	0	0	0	0	0	0	0	0	0	0	0	0	0	0	0	0	0	0
	Gov Eq 2 (27)	0	0	0	0	0	0	0	0	0	0	0	0	0	0	0	0	0	0	0	0	0	0	0	0	0	0	0	0	0	0	0	0	0	0	0	0	0	0	0	0	0	0	0	0	0	0	0	0
	Gov Eq 1 (28)	0	0	0	0	0	0	0	0	0	0	0	0	0	0	0	0	0	0	0	0	0	0	0	0	0	0	0	0	0	0	0	0	0	0	0	0	0	0	0	0	0	0	0	0	0	0	0	0
	Gov Eq 2 (28)	0	0	0	0	0	0	0	0	0	0	0	0	0	0	0	0	0	0	0	0	0	0	0	0	0	0	0	0	0	0	0	0	0	0	0	0	0	0	0	0	0	0	0	0	0	0	0	0
	Gov Eq 1 (29)	0	0	0	0	0	0	0	0	0	0	0	0	0	0	0	0	0	0	0	0	0	0	0	0	0	0	0	0	0	0	0	0	0	0	0	0	0	0	0	0	0	0	0	0	0	0	0	0
	Gov Eq 2 (29)	0	0	0	0	0	0	0	0	0	0	0	0	0	0	0	0	0	0	0	0	0	0	0	0	0	0	0	0	0	0	0	0	0	0	0	0	0	0	0	0	0	0	0	0	0	0	0	0
	Gov Eq 1 (30)	0	0	0	0	0	0	0	0	0	0	0	0	0	0	0	0	0	0	0	0	0	0	0	0	0	0	0	0	0	0	0	0	0	0	0	0	0	0	0	0	0	0	0	0	0	0	0	0
	Gov Eq 2 (30)	0	0	0	0	0	0	0	0	0	0	0	0	0	0	0	0	0	0	0	0	0	0	0	0	0	0	0	0	0	0	0	0	0	0	0	0	0	0	0	0	0	0	0	0	0	0	0	0
	Gov Eq 1 (31)	0	0	0	0	0	0	0	0	0	0	0	0	0	0	0	0	0	0	0	0	0	0	0	0	0	0	0	0	0	0	0	0	0	0	0	0	0	0	0	0	0	0	0	0	0	0	0	0
	Gov Eq 2 (31)	0	0	0	0	0	0	0	0	0	0	0	0	0	0	0	0	0	0	0	0	0	0	0	0	0	0	0	0	0	0	0	0	0	0	0	0	0	0	0	0	0	0	0	0	0	0	0	0
	Gov Eq 1 (32)	0	0	0	0	0	0	0	0	0	0	0	0	0	0	0	0	0	0	0	0	0	0	0	0	0	0	0	0	0	0	0	0	0	0	0	0	0	0	0	0	0	0	0	0	0	0	0	0
	Gov Eq 2 (32)	0	0	0	0	0	0	0	0	0	0	0	0	0	0	0	0	0	0	0	0	0	0	0	0	0	0	0	0	0	0	0	0	0	0	0	0	0	0	0	0	0	0	0	0	0	0	0	0
	Gov Eq 1 (33)	0	0	0	0	0	0	0	0	0	0	0	0	0	0	0	0	0	0	0	0	0	0	0	0	0	0	0	0	0	0	0	0	0	0	0	0	0	0	0	0	0	0	0	0	0	0	0	0
	Gov Eq 2 (33)	0	0	0	0	0	0	0	0	0	0	0	0	0	0	0	0	0	0	0	0	0	0	0	0	0	0	0	0	0	0	0	0	0	0	0	0	0	0	0	0	0	0	0	0	0	0	0	0
	Bo Co 1 (1)	0	0	1	0	0	0	0	0	0	0	0	0	0	0	0	0	0	0	0	0	0	0	0	0	0	0	0	0	0	0	0	0	0	0	0	0	0	0	0	0	0	0	0	0	0	0	0	0
	Bo Co 2 (1)	0	0	0	1	0	0	0	0	0	0	0	0	0	0	0	0	0	0	0	0	0	0	0	0	0	0	0	0	0	0	0	0	0	0	0	0	0	0	0	0	0	0	0	0	0	0	0	0
	Bo Co 1 (33)	0	0	0	0	0	0	0	0	0	0	0	0	0	0	0	0	0	0	0	0	0	0	0	0	0	0	0	0	0	0	0	0	0	0	0	0	0	0	0	0	0	0	0	0	0	0	0	0
	Bo Co 2 (33)	0	0	0	0	0	0	0	0	0	0	0	0	0	0	0	0	0	0	0	0	0	0	0	0	0	0	0	0	0	0	0	0	0	0	0	0	0	0	0	0	0	0	0	0	0	0	0	0
	W-F FDM approximation
		41-point grid
	n =	40
		0.025
		0.0312
	kRIr =	0.01
		0.0200321
		3.56389				Determinant =	0.000202257
					PSM	ABAQUS	9 pt	17 pt	25 pt	33 pt	41
		4.96146e-06		0.00793834	3.5591	3.6890	3.68387	3.58946	3.57249	3.56661	3.56389
		0.5
			Nodes	1		2		3		4		5		6		7		8		9		10		11		12		13		14		15		16		17		18		19		20		21		22		23
				0		0.025		0.05		0.075		0.1		0.125		0.15		0.175		0.2		0.225		0.25		0.275		0.3		0.325		0.35		0.375		0.4		0.425		0.45		0.475		0.5		0.525		0.55
				1		0.962967		0.926859		0.891666		0.857375		0.823975		0.791453		0.759799		0.729		0.699045		0.669922		0.641619		0.614125		0.587428		0.561516		0.536377		0.512		0.488373		0.465484		0.443322		0.421875		0.401131		0.381078
				-0.0375		-0.0365684		-0.0356484		-0.0347402		-0.0338438		-0.032959		-0.0320859		-0.0312246		-0.030375		-0.0295371		-0.0287109		-0.0278965		-0.0270937		-0.0263027		-0.0255234		-0.0247559		-0.024		-0.0232559		-0.0225234		-0.0218027		-0.0210938		-0.0203965		-0.0197109
				1		0.9875		0.975		0.9625		0.95		0.9375		0.925		0.9125		0.9		0.8875		0.875		0.8625		0.85		0.8375		0.825		0.8125		0.8		0.7875		0.775		0.7625		0.75		0.7375		0.725
				-0.0125		-0.0125		-0.0125		-0.0125		-0.0125		-0.0125		-0.0125		-0.0125		-0.0125		-0.0125		-0.0125		-0.0125		-0.0125		-0.0125		-0.0125		-0.0125		-0.0125		-0.0125		-0.0125		-0.0125		-0.0125		-0.0125		-0.0125
		W0	hkF0	W1	hkF1	W2	hkF2	W3	hkF3	W4	hkF4	W5	hkF5	W6	hkF6	W7	hkF7	W8	hkF8	W9	hkF9	W10	hkF10	W11	hkF11	W12	hkF12	W13	hkF13	W14	hkF14	W15	hkF15	W16	hkF16	W17	hkF17	W18	hkF18	W19	hkF19	W20	hkF20	W21	hkF21	W22	hkF22	W23	hkF23
	Gov Eq 1 (1)	0.0201573	0.010016	-0.0400591	0.000250401	0.0199069	-0.010016	0	0	0	0	0	0	0	0	0	0	0	0	0	0	0	0	0	0	0	0	0	0	0	0	0	0	0	0	0	0	0	0	0	0	0	0	0	0	0	0	0	0
	Gov Eq 2 (1)	-0.010016	1.01875	0	-2.01995	0.010016	0.98125	0	0	0	0	0	0	0	0	0	0	0	0	0	0	0	0	0	0	0	0	0	0	0	0	0	0	0	0	0	0	0	0	0	0	0	0	0	0	0	0	0	0
	Gov Eq 1 (2)	0	0	0.0199069	0.00989083	-0.0395584	0.000250401	0.0196565	-0.00989083	0	0	0	0	0	0	0	0	0	0	0	0	0	0	0	0	0	0	0	0	0	0	0	0	0	0	0	0	0	0	0	0	0	0	0	0	0	0	0	0
	Gov Eq 2 (2)	0	0	-0.00989083	0.981251	0	-1.94564	0.00989083	0.944683	0	0	0	0	0	0	0	0	0	0	0	0	0	0	0	0	0	0	0	0	0	0	0	0	0	0	0	0	0	0	0	0	0	0	0	0	0	0	0	0
	Gov Eq 1 (3)	0	0	0	0	0.0196565	0.00976562	-0.0390577	0.000250401	0.019406	-0.00976562	0	0	0	0	0	0	0	0	0	0	0	0	0	0	0	0	0	0	0	0	0	0	0	0	0	0	0	0	0	0	0	0	0	0	0	0	0	0
	Gov Eq 2 (3)	0	0	0	0	-0.00976562	0.944684	0	-1.87318	0.00976562	0.909035	0	0	0	0	0	0	0	0	0	0	0	0	0	0	0	0	0	0	0	0	0	0	0	0	0	0	0	0	0	0	0	0	0	0	0	0	0	0
	Gov Eq 1 (4)	0	0	0	0	0	0	0.019406	0.00964042	-0.0385569	0.000250401	0.0191556	-0.00964042	0	0	0	0	0	0	0	0	0	0	0	0	0	0	0	0	0	0	0	0	0	0	0	0	0	0	0	0	0	0	0	0	0	0	0	0
	Gov Eq 2 (4)	0	0	0	0	0	0	-0.00964042	0.909036	0	-1.80254	0.00964042	0.874296	0	0	0	0	0	0	0	0	0	0	0	0	0	0	0	0	0	0	0	0	0	0	0	0	0	0	0	0	0	0	0	0	0	0	0	0
	Gov Eq 1 (5)	0	0	0	0	0	0	0	0	0.0191556	0.00951522	-0.0380562	0.000250401	0.0189052	-0.00951522	0	0	0	0	0	0	0	0	0	0	0	0	0	0	0	0	0	0	0	0	0	0	0	0	0	0	0	0	0	0	0	0	0	0
	Gov Eq 2 (5)	0	0	0	0	0	0	0	0	-0.00951522	0.874297	0	-1.73371	0.00951522	0.840453	0	0	0	0	0	0	0	0	0	0	0	0	0	0	0	0	0	0	0	0	0	0	0	0	0	0	0	0	0	0	0	0	0	0
	Gov Eq 1 (6)	0	0	0	0	0	0	0	0	0	0	0.0189052	0.00939002	-0.0375554	0.000250401	0.0186548	-0.00939002	0	0	0	0	0	0	0	0	0	0	0	0	0	0	0	0	0	0	0	0	0	0	0	0	0	0	0	0	0	0	0	0
	Gov Eq 2 (6)	0	0	0	0	0	0	0	0	0	0	-0.00939002	0.840454	0	-1.66666	0.00939002	0.807495	0	0	0	0	0	0	0	0	0	0	0	0	0	0	0	0	0	0	0	0	0	0	0	0	0	0	0	0	0	0	0	0
	Gov Eq 1 (7)	0	0	0	0	0	0	0	0	0	0	0	0	0.0186548	0.00926482	-0.0370547	0.000250401	0.0184044	-0.00926482	0	0	0	0	0	0	0	0	0	0	0	0	0	0	0	0	0	0	0	0	0	0	0	0	0	0	0	0	0	0
	Gov Eq 2 (7)	0	0	0	0	0	0	0	0	0	0	0	0	-0.00926482	0.807496	0	-1.60137	0.00926482	0.77541	0	0	0	0	0	0	0	0	0	0	0	0	0	0	0	0	0	0	0	0	0	0	0	0	0	0	0	0	0	0
	Gov Eq 1 (8)	0	0	0	0	0	0	0	0	0	0	0	0	0	0	0.0184044	0.00913962	-0.036554	0.000250401	0.018154	-0.00913962	0	0	0	0	0	0	0	0	0	0	0	0	0	0	0	0	0	0	0	0	0	0	0	0	0	0	0	0
	Gov Eq 2 (8)	0	0	0	0	0	0	0	0	0	0	0	0	0	0	-0.00913962	0.775411	0	-1.53782	0.00913962	0.744187	0	0	0	0	0	0	0	0	0	0	0	0	0	0	0	0	0	0	0	0	0	0	0	0	0	0	0	0
	Gov Eq 1 (9)	0	0	0	0	0	0	0	0	0	0	0	0	0	0	0	0	0.018154	0.00901442	-0.0360532	0.000250401	0.0179036	-0.00901442	0	0	0	0	0	0	0	0	0	0	0	0	0	0	0	0	0	0	0	0	0	0	0	0	0	0
	Gov Eq 2 (9)	0	0	0	0	0	0	0	0	0	0	0	0	0	0	0	0	-0.00901442	0.744188	0	-1.47597	0.00901442	0.713813	0	0	0	0	0	0	0	0	0	0	0	0	0	0	0	0	0	0	0	0	0	0	0	0	0	0
	Gov Eq 1 (10)	0	0	0	0	0	0	0	0	0	0	0	0	0	0	0	0	0	0	0.0179036	0.00888922	-0.0355525	0.000250401	0.0176532	-0.00888922	0	0	0	0	0	0	0	0	0	0	0	0	0	0	0	0	0	0	0	0	0	0	0	0
	Gov Eq 2 (10)	0	0	0	0	0	0	0	0	0	0	0	0	0	0	0	0	0	0	-0.00888922	0.713813	0	-1.41581	0.00888922	0.684276	0	0	0	0	0	0	0	0	0	0	0	0	0	0	0	0	0	0	0	0	0	0	0	0
	Gov Eq 1 (11)	0	0	0	0	0	0	0	0	0	0	0	0	0	0	0	0	0	0	0	0	0.0176532	0.00876402	-0.0350517	0.000250401	0.0174028	-0.00876402	0	0	0	0	0	0	0	0	0	0	0	0	0	0	0	0	0	0	0	0	0	0
	Gov Eq 2 (11)	0	0	0	0	0	0	0	0	0	0	0	0	0	0	0	0	0	0	0	0	-0.00876402	0.684277	0	-1.35732	0.00876402	0.655566	0	0	0	0	0	0	0	0	0	0	0	0	0	0	0	0	0	0	0	0	0	0
	Gov Eq 1 (12)	0	0	0	0	0	0	0	0	0	0	0	0	0	0	0	0	0	0	0	0	0	0	0.0174028	0.00863882	-0.034551	0.000250401	0.0171524	-0.00863882	0	0	0	0	0	0	0	0	0	0	0	0	0	0	0	0	0	0	0	0
	Gov Eq 2 (12)	0	0	0	0	0	0	0	0	0	0	0	0	0	0	0	0	0	0	0	0	0	0	-0.00863882	0.655567	0	-1.30046	0.00863882	0.627671	0	0	0	0	0	0	0	0	0	0	0	0	0	0	0	0	0	0	0	0
	Gov Eq 1 (13)	0	0	0	0	0	0	0	0	0	0	0	0	0	0	0	0	0	0	0	0	0	0	0	0	0.0171524	0.00851362	-0.0340503	0.000250401	0.016902	-0.00851362	0	0	0	0	0	0	0	0	0	0	0	0	0	0	0	0	0	0
	Gov Eq 2 (13)	0	0	0	0	0	0	0	0	0	0	0	0	0	0	0	0	0	0	0	0	0	0	0	0	-0.00851362	0.627672	0	-1.24523	0.00851362	0.600578	0	0	0	0	0	0	0	0	0	0	0	0	0	0	0	0	0	0
	Gov Eq 1 (14)	0	0	0	0	0	0	0	0	0	0	0	0	0	0	0	0	0	0	0	0	0	0	0	0	0	0	0.016902	0.00838842	-0.0335495	0.000250401	0.0166516	-0.00838842	0	0	0	0	0	0	0	0	0	0	0	0	0	0	0	0
	Gov Eq 2 (14)	0	0	0	0	0	0	0	0	0	0	0	0	0	0	0	0	0	0	0	0	0	0	0	0	0	0	-0.00838842	0.600579	0	-1.19159	0.00838842	0.574276	0	0	0	0	0	0	0	0	0	0	0	0	0	0	0	0
	Gov Eq 1 (15)	0	0	0	0	0	0	0	0	0	0	0	0	0	0	0	0	0	0	0	0	0	0	0	0	0	0	0	0	0.0166516	0.00826322	-0.0330488	0.000250401	0.0164012	-0.00826322	0	0	0	0	0	0	0	0	0	0	0	0	0	0
	Gov Eq 2 (15)	0	0	0	0	0	0	0	0	0	0	0	0	0	0	0	0	0	0	0	0	0	0	0	0	0	0	0	0	-0.00826322	0.574277	0	-1.13951	0.00826322	0.548754	0	0	0	0	0	0	0	0	0	0	0	0	0	0
	Gov Eq 1 (16)	0	0	0	0	0	0	0	0	0	0	0	0	0	0	0	0	0	0	0	0	0	0	0	0	0	0	0	0	0	0	0.0164012	0.00813802	-0.0325481	0.000250401	0.0161508	-0.00813802	0	0	0	0	0	0	0	0	0	0	0	0
	Gov Eq 2 (16)	0	0	0	0	0	0	0	0	0	0	0	0	0	0	0	0	0	0	0	0	0	0	0	0	0	0	0	0	0	0	-0.00813802	0.548755	0	-1.08899	0.00813802	0.523999	0	0	0	0	0	0	0	0	0	0	0	0
	Gov Eq 1 (17)	0	0	0	0	0	0	0	0	0	0	0	0	0	0	0	0	0	0	0	0	0	0	0	0	0	0	0	0	0	0	0	0	0.0161508	0.00801282	-0.0320473	0.000250401	0.0159004	-0.00801282	0	0	0	0	0	0	0	0	0	0
	Gov Eq 2 (17)	0	0	0	0	0	0	0	0	0	0	0	0	0	0	0	0	0	0	0	0	0	0	0	0	0	0	0	0	0	0	0	0	-0.00801282	0.524	0	-1.03998	0.00801282	0.5	0	0	0	0	0	0	0	0	0	0
	Gov Eq 1 (18)	0	0	0	0	0	0	0	0	0	0	0	0	0	0	0	0	0	0	0	0	0	0	0	0	0	0	0	0	0	0	0	0	0	0	0.0159004	0.00788762	-0.0315466	0.000250401	0.01565	-0.00788762	0	0	0	0	0	0	0	0
	Gov Eq 2 (18)	0	0	0	0	0	0	0	0	0	0	0	0	0	0	0	0	0	0	0	0	0	0	0	0	0	0	0	0	0	0	0	0	0	0	-0.00788762	0.500001	0	-0.992483	0.00788762	0.476745	0	0	0	0	0	0	0	0
	Gov Eq 1 (19)	0	0	0	0	0	0	0	0	0	0	0	0	0	0	0	0	0	0	0	0	0	0	0	0	0	0	0	0	0	0	0	0	0	0	0	0	0.01565	0.00776242	-0.0310458	0.000250401	0.0153996	-0.00776242	0	0	0	0	0	0
	Gov Eq 2 (19)	0	0	0	0	0	0	0	0	0	0	0	0	0	0	0	0	0	0	0	0	0	0	0	0	0	0	0	0	0	0	0	0	0	0	0	0	-0.00776242	0.476746	0	-0.946457	0.00776242	0.454223	0	0	0	0	0	0
	Gov Eq 1 (20)	0	0	0	0	0	0	0	0	0	0	0	0	0	0	0	0	0	0	0	0	0	0	0	0	0	0	0	0	0	0	0	0	0	0	0	0	0	0	0.0153996	0.00763722	-0.0305451	0.000250401	0.0151492	-0.00763722	0	0	0	0
	Gov Eq 2 (20)	0	0	0	0	0	0	0	0	0	0	0	0	0	0	0	0	0	0	0	0	0	0	0	0	0	0	0	0	0	0	0	0	0	0	0	0	0	0	-0.00763722	0.454224	0	-0.901884	0.00763722	0.432421	0	0	0	0
	Gov Eq 1 (21)	0	0	0	0	0	0	0	0	0	0	0	0	0	0	0	0	0	0	0	0	0	0	0	0	0	0	0	0	0	0	0	0	0	0	0	0	0	0	0	0	0.0151492	0.00751202	-0.0300444	0.000250401	0.0148988	-0.00751202	0	0
	Gov Eq 2 (21)	0	0	0	0	0	0	0	0	0	0	0	0	0	0	0	0	0	0	0	0	0	0	0	0	0	0	0	0	0	0	0	0	0	0	0	0	0	0	0	0	-0.00751202	0.432422	0	-0.858741	0.00751202	0.411328	0	0
	Gov Eq 1 (22)	0	0	0	0	0	0	0	0	0	0	0	0	0	0	0	0	0	0	0	0	0	0	0	0	0	0	0	0	0	0	0	0	0	0	0	0	0	0	0	0	0	0	0.0148988	0.00738682	-0.0295436	0.000250401	0.0146484	-0.00738682
	Gov Eq 2 (22)	0	0	0	0	0	0	0	0	0	0	0	0	0	0	0	0	0	0	0	0	0	0	0	0	0	0	0	0	0	0	0	0	0	0	0	0	0	0	0	0	0	0	-0.00738682	0.411329	0	-0.817004	0.00738682	0.390933
	Gov Eq 1 (23)	0	0	0	0	0	0	0	0	0	0	0	0	0	0	0	0	0	0	0	0	0	0	0	0	0	0	0	0	0	0	0	0	0	0	0	0	0	0	0	0	0	0	0	0	0.0146484	0.00726162	-0.0290429	0.000250401
	Gov Eq 2 (23)	0	0	0	0	0	0	0	0	0	0	0	0	0	0	0	0	0	0	0	0	0	0	0	0	0	0	0	0	0	0	0	0	0	0	0	0	0	0	0	0	0	0	0	0	-0.00726162	0.390934	0	-0.776649
	Gov Eq 1 (24)	0	0	0	0	0	0	0	0	0	0	0	0	0	0	0	0	0	0	0	0	0	0	0	0	0	0	0	0	0	0	0	0	0	0	0	0	0	0	0	0	0	0	0	0	0	0	0.014398	0.00713642
	Gov Eq 2 (24)	0	0	0	0	0	0	0	0	0	0	0	0	0	0	0	0	0	0	0	0	0	0	0	0	0	0	0	0	0	0	0	0	0	0	0	0	0	0	0	0	0	0	0	0	0	0	-0.00713642	0.371224
	Gov Eq 1 (25)	0	0	0	0	0	0	0	0	0	0	0	0	0	0	0	0	0	0	0	0	0	0	0	0	0	0	0	0	0	0	0	0	0	0	0	0	0	0	0	0	0	0	0	0	0	0	0	0
	Gov Eq 2 (25)	0	0	0	0	0	0	0	0	0	0	0	0	0	0	0	0	0	0	0	0	0	0	0	0	0	0	0	0	0	0	0	0	0	0	0	0	0	0	0	0	0	0	0	0	0	0	0	0
	Gov Eq 1 (26)	0	0	0	0	0	0	0	0	0	0	0	0	0	0	0	0	0	0	0	0	0	0	0	0	0	0	0	0	0	0	0	0	0	0	0	0	0	0	0	0	0	0	0	0	0	0	0	0
	Gov Eq 2 (26)	0	0	0	0	0	0	0	0	0	0	0	0	0	0	0	0	0	0	0	0	0	0	0	0	0	0	0	0	0	0	0	0	0	0	0	0	0	0	0	0	0	0	0	0	0	0	0	0
	Gov Eq 1 (27)	0	0	0	0	0	0	0	0	0	0	0	0	0	0	0	0	0	0	0	0	0	0	0	0	0	0	0	0	0	0	0	0	0	0	0	0	0	0	0	0	0	0	0	0	0	0	0	0
	Gov Eq 2 (27)	0	0	0	0	0	0	0	0	0	0	0	0	0	0	0	0	0	0	0	0	0	0	0	0	0	0	0	0	0	0	0	0	0	0	0	0	0	0	0	0	0	0	0	0	0	0	0	0
	Gov Eq 1 (28)	0	0	0	0	0	0	0	0	0	0	0	0	0	0	0	0	0	0	0	0	0	0	0	0	0	0	0	0	0	0	0	0	0	0	0	0	0	0	0	0	0	0	0	0	0	0	0	0
	Gov Eq 2 (28)	0	0	0	0	0	0	0	0	0	0	0	0	0	0	0	0	0	0	0	0	0	0	0	0	0	0	0	0	0	0	0	0	0	0	0	0	0	0	0	0	0	0	0	0	0	0	0	0
	Gov Eq 1 (29)	0	0	0	0	0	0	0	0	0	0	0	0	0	0	0	0	0	0	0	0	0	0	0	0	0	0	0	0	0	0	0	0	0	0	0	0	0	0	0	0	0	0	0	0	0	0	0	0
	Gov Eq 2 (29)	0	0	0	0	0	0	0	0	0	0	0	0	0	0	0	0	0	0	0	0	0	0	0	0	0	0	0	0	0	0	0	0	0	0	0	0	0	0	0	0	0	0	0	0	0	0	0	0
	Gov Eq 1 (30)	0	0	0	0	0	0	0	0	0	0	0	0	0	0	0	0	0	0	0	0	0	0	0	0	0	0	0	0	0	0	0	0	0	0	0	0	0	0	0	0	0	0	0	0	0	0	0	0
	Gov Eq 2 (30)	0	0	0	0	0	0	0	0	0	0	0	0	0	0	0	0	0	0	0	0	0	0	0	0	0	0	0	0	0	0	0	0	0	0	0	0	0	0	0	0	0	0	0	0	0	0	0	0
	Gov Eq 1 (31)	0	0	0	0	0	0	0	0	0	0	0	0	0	0	0	0	0	0	0	0	0	0	0	0	0	0	0	0	0	0	0	0	0	0	0	0	0	0	0	0	0	0	0	0	0	0	0	0
	Gov Eq 2 (31)	0	0	0	0	0	0	0	0	0	0	0	0	0	0	0	0	0	0	0	0	0	0	0	0	0	0	0	0	0	0	0	0	0	0	0	0	0	0	0	0	0	0	0	0	0	0	0	0
	Gov Eq 1 (32)	0	0	0	0	0	0	0	0	0	0	0	0	0	0	0	0	0	0	0	0	0	0	0	0	0	0	0	0	0	0	0	0	0	0	0	0	0	0	0	0	0	0	0	0	0	0	0	0
	Gov Eq 2 (32)	0	0	0	0	0	0	0	0	0	0	0	0	0	0	0	0	0	0	0	0	0	0	0	0	0	0	0	0	0	0	0	0	0	0	0	0	0	0	0	0	0	0	0	0	0	0	0	0
	Gov Eq 1 (33)	0	0	0	0	0	0	0	0	0	0	0	0	0	0	0	0	0	0	0	0	0	0	0	0	0	0	0	0	0	0	0	0	0	0	0	0	0	0	0	0	0	0	0	0	0	0	0	0
	Gov Eq 2 (33)	0	0	0	0	0	0	0	0	0	0	0	0	0	0	0	0	0	0	0	0	0	0	0	0	0	0	0	0	0	0	0	0	0	0	0	0	0	0	0	0	0	0	0	0	0	0	0	0
	Gov Eq 1 (34)	0	0	0	0	0	0	0	0	0	0	0	0	0	0	0	0	0	0	0	0	0	0	0	0	0	0	0	0	0	0	0	0	0	0	0	0	0	0	0	0	0	0	0	0	0	0	0	0
	Gov Eq 2 (34)	0	0	0	0	0	0	0	0	0	0	0	0	0	0	0	0	0	0	0	0	0	0	0	0	0	0	0	0	0	0	0	0	0	0	0	0	0	0	0	0	0	0	0	0	0	0	0	0
	Gov Eq 1 (35)	0	0	0	0	0	0	0	0	0	0	0	0	0	0	0	0	0	0	0	0	0	0	0	0	0	0	0	0	0	0	0	0	0	0	0	0	0	0	0	0	0	0	0	0	0	0	0	0
	Gov Eq 2 (35)	0	0	0	0	0	0	0	0	0	0	0	0	0	0	0	0	0	0	0	0	0	0	0	0	0	0	0	0	0	0	0	0	0	0	0	0	0	0	0	0	0	0	0	0	0	0	0	0
	Gov Eq 1 (36)	0	0	0	0	0	0	0	0	0	0	0	0	0	0	0	0	0	0	0	0	0	0	0	0	0	0	0	0	0	0	0	0	0	0	0	0	0	0	0	0	0	0	0	0	0	0	0	0
	Gov Eq 2 (36)	0	0	0	0	0	0	0	0	0	0	0	0	0	0	0	0	0	0	0	0	0	0	0	0	0	0	0	0	0	0	0	0	0	0	0	0	0	0	0	0	0	0	0	0	0	0	0	0
	Gov Eq 1 (37)	0	0	0	0	0	0	0	0	0	0	0	0	0	0	0	0	0	0	0	0	0	0	0	0	0	0	0	0	0	0	0	0	0	0	0	0	0	0	0	0	0	0	0	0	0	0	0	0
	Gov Eq 2 (37)	0	0	0	0	0	0	0	0	0	0	0	0	0	0	0	0	0	0	0	0	0	0	0	0	0	0	0	0	0	0	0	0	0	0	0	0	0	0	0	0	0	0	0	0	0	0	0	0
	Gov Eq 1 (38)	0	0	0	0	0	0	0	0	0	0	0	0	0	0	0	0	0	0	0	0	0	0	0	0	0	0	0	0	0	0	0	0	0	0	0	0	0	0	0	0	0	0	0	0	0	0	0	0
	Gov Eq 2 (38)	0	0	0	0	0	0	0	0	0	0	0	0	0	0	0	0	0	0	0	0	0	0	0	0	0	0	0	0	0	0	0	0	0	0	0	0	0	0	0	0	0	0	0	0	0	0	0	0
	Gov Eq 1 (39)	0	0	0	0	0	0	0	0	0	0	0	0	0	0	0	0	0	0	0	0	0	0	0	0	0	0	0	0	0	0	0	0	0	0	0	0	0	0	0	0	0	0	0	0	0	0	0	0
	Gov Eq 2 (39)	0	0	0	0	0	0	0	0	0	0	0	0	0	0	0	0	0	0	0	0	0	0	0	0	0	0	0	0	0	0	0	0	0	0	0	0	0	0	0	0	0	0	0	0	0	0	0	0
	Gov Eq 1 (40)	0	0	0	0	0	0	0	0	0	0	0	0	0	0	0	0	0	0	0	0	0	0	0	0	0	0	0	0	0	0	0	0	0	0	0	0	0	0	0	0	0	0	0	0	0	0	0	0
	Gov Eq 2 (40)	0	0	0	0	0	0	0	0	0	0	0	0	0	0	0	0	0	0	0	0	0	0	0	0	0	0	0	0	0	0	0	0	0	0	0	0	0	0	0	0	0	0	0	0	0	0	0	0
	Gov Eq 1 (41)	0	0	0	0	0	0	0	0	0	0	0	0	0	0	0	0	0	0	0	0	0	0	0	0	0	0	0	0	0	0	0	0	0	0	0	0	0	0	0	0	0	0	0	0	0	0	0	0
	Gov Eq 2 (41)	0	0	0	0	0	0	0	0	0	0	0	0	0	0	0	0	0	0	0	0	0	0	0	0	0	0	0	0	0	0	0	0	0	0	0	0	0	0	0	0	0	0	0	0	0	0	0	0
	Bo Co 1 (1)	0	0	1	0	0	0	0	0	0	0	0	0	0	0	0	0	0	0	0	0	0	0	0	0	0	0	0	0	0	0	0	0	0	0	0	0	0	0	0	0	0	0	0	0	0	0	0	0
	Bo Co 2 (1)	0	0	0	1	0	0	0	0	0	0	0	0	0	0	0	0	0	0	0	0	0	0	0	0	0	0	0	0	0	0	0	0	0	0	0	0	0	0	0	0	0	0	0	0	0	0	0	0
	Bo Co 1 (41)	0	0	0	0	0	0	0	0	0	0	0	0	0	0	0	0	0	0	0	0	0	0	0	0	0	0	0	0	0	0	0	0	0	0	0	0	0	0	0	0	0	0	0	0	0	0	0	0
	Bo Co 2 (41)	0	0	0	0	0	0	0	0	0	0	0	0	0	0	0	0	0	0	0	0	0	0	0	0	0	0	0	0	0	0	0	0	0	0	0	0	0	0	0	0	0	0	0	0	0	0	0	0
[truncated: 38 more columns]

## Sheet: Pinned-pinned beam
		Vibration analysis of a tapered pinned-pinned Timoshenko beam
	W-F FDM approximation
		Nine-point grid
	n =	8
		0.125
					Poisson ratio:	0.3
		0.0312			Shear correction factor:	0.833333
	kRIr =	0.01
		0.500801
		7.03143				Determinant =	3.81074e-05
					PSM	ABAQUS	9 pt
		0.0120705		0.772515	6.4442	6.4740	7.03143
		0.5
			Nodes	1		2		3		4		5		6		7		8		9
				0		0.125		0.25		0.375		0.5		0.625		0.75		0.875		1
				1		0.823975		0.669922		0.536377		0.421875		0.324951		0.244141		0.177979		0.125
				-0.1875		-0.164795		-0.143555		-0.123779		-0.105469		-0.088623		-0.0732422		-0.0593262		-0.046875
				1		0.9375		0.875		0.8125		0.75		0.6875		0.625		0.5625		0.5
				-0.0625		-0.0625		-0.0625		-0.0625		-0.0625		-0.0625		-0.0625		-0.0625		-0.0625
		W0	hkF0	W1	hkF1	W2	hkF2	W3	hkF3	W4	hkF4	W5	hkF5	W6	hkF6	W7	hkF7	W8	hkF8	W9	hkF9	W10	hkF10
	Gov Eq 1 (1)	0.516451	0.250401	-0.989532	0.0313001	0.485151	-0.250401	0	0	0	0	0	0	0	0	0	0	0	0	0	0	0	0
	Gov Eq 2 (1)	-0.250401	1.09375	0	-2.49308	0.250401	0.90625	0	0	0	0	0	0	0	0	0	0	0	0	0	0	0	0
	Gov Eq 1 (2)	0	0	0.485151	0.234751	-0.927686	0.0313001	0.453851	-0.234751	0	0	0	0	0	0	0	0	0	0	0	0	0	0
	Gov Eq 2 (2)	0	0	-0.234751	0.906372	0	-2.11109	0.234751	0.741577	0	0	0	0	0	0	0	0	0	0	0	0	0	0
	Gov Eq 1 (3)	0	0	0	0	0.453851	0.219101	-0.865841	0.0313001	0.422551	-0.219101	0	0	0	0	0	0	0	0	0	0	0	0
	Gov Eq 2 (3)	0	0	0	0	-0.219101	0.741699	0	-1.77287	0.219101	0.598145	0	0	0	0	0	0	0	0	0	0	0	0
	Gov Eq 1 (4)	0	0	0	0	0	0	0.422551	0.203451	-0.803995	0.0313001	0.391251	-0.203451	0	0	0	0	0	0	0	0	0	0
	Gov Eq 2 (4)	0	0	0	0	0	0	-0.203451	0.598267	0	-1.47551	0.203451	0.474487	0	0	0	0	0	0	0	0	0	0
	Gov Eq 1 (5)	0	0	0	0	0	0	0	0	0.391251	0.1878	-0.742149	0.0313001	0.359951	-0.1878	0	0	0	0	0	0	0	0
	Gov Eq 2 (5)	0	0	0	0	0	0	0	0	-0.1878	0.474609	0	-1.21609	0.1878	0.369141	0	0	0	0	0	0	0	0
	Gov Eq 1 (6)	0	0	0	0	0	0	0	0	0	0	0.359951	0.17215	-0.680303	0.0313001	0.328651	-0.17215	0	0	0	0	0	0
	Gov Eq 2 (6)	0	0	0	0	0	0	0	0	0	0	-0.17215	0.369263	0	-0.991693	0.17215	0.28064	0	0	0	0	0	0
	Gov Eq 1 (7)	0	0	0	0	0	0	0	0	0	0	0	0	0.328651	0.1565	-0.618458	0.0313001	0.297351	-0.1565	0	0	0	0
	Gov Eq 2 (7)	0	0	0	0	0	0	0	0	0	0	0	0	-0.1565	0.280762	0	-0.799396	0.1565	0.20752	0	0	0	0
	Gov Eq 1 (8)	0	0	0	0	0	0	0	0	0	0	0	0	0	0	0.297351	0.14085	-0.556612	0.0313001	0.266051	-0.14085	0	0
	Gov Eq 2 (8)	0	0	0	0	0	0	0	0	0	0	0	0	0	0	-0.14085	0.207642	0	-0.636283	0.14085	0.148315	0	0
	Gov Eq 1 (9)	0	0	0	0	0	0	0	0	0	0	0	0	0	0	0	0	0.266051	0.1252	-0.494766	0.0313001	0.234751	-0.1252
	Gov Eq 2 (9)	0	0	0	0	0	0	0	0	0	0	0	0	0	0	0	0	-0.1252	0.148438	0	-0.499435	0.1252	0.101562
	Bo Co 1 (1)	0	0	1	0	0	0	0	0	0	0	0	0	0	0	0	0	0	0	0	0	0	0
	Bo Co 2 (1)	0	1	0	0	0	-1	0	0	0	0	0	0	0	0	0	0	0	0	0	0	0	0
	Bo Co 1 (9)	0	0	0	0	0	0	0	0	0	0	0	0	0	0	0	0	0	0	1	0	0	0
	Bo Co 2 (9)	0	0	0	0	0	0	0	0	0	0	0	0	0	0	0	0	0	1	0	0	0	-1
	W-F FDM approximation
		17-point grid
	n =	16
		0.0625
		0.0312
	kRIr =	0.01
		0.1252
		6.59239				Determinant =	-8.48379e-05
					PSM	ABAQUS	9 pt	17 pt
		0.000663141		0.169764	6.4442	6.4740	7.03143	6.59239
		0.5
			Nodes	1		2		3		4		5		6		7		8		9		10		11		12		13		14		15		16		17
				0		0.0625		0.125		0.1875		0.25		0.3125		0.375		0.4375		0.5		0.5625		0.625		0.6875		0.75		0.8125		0.875		0.9375		1
				1		0.909149		0.823975		0.744293		0.669922		0.600677		0.536377		0.476837		0.421875		0.371307		0.324951		0.282623		0.244141		0.20932		0.177979		0.149933		0.125
				-0.09375		-0.0879822		-0.0823975		-0.0769958		-0.0717773		-0.0667419		-0.0618896		-0.0572205		-0.0527344		-0.0484314		-0.0443115		-0.0403748		-0.0366211		-0.0330505		-0.0296631		-0.0264587		-0.0234375
				1		0.96875		0.9375		0.90625		0.875		0.84375		0.8125		0.78125		0.75		0.71875		0.6875		0.65625		0.625		0.59375		0.5625		0.53125		0.5
				-0.03125		-0.03125		-0.03125		-0.03125		-0.03125		-0.03125		-0.03125		-0.03125		-0.03125		-0.03125		-0.03125		-0.03125		-0.03125		-0.03125		-0.03125		-0.03125		-0.03125
		W0	hkF0	W1	hkF1	W2	hkF2	W3	hkF3	W4	hkF4	W5	hkF5	W6	hkF6	W7	hkF7	W8	hkF8	W9	hkF9	W10	hkF10	W11	hkF11	W12	hkF12	W13	hkF13	W14	hkF14	W15	hkF15	W16	hkF16	W17	hkF17	W18	hkF18
	Gov Eq 1 (1)	0.127157	0.0626002	-0.249737	0.00391251	0.123244	-0.0626002	0	0	0	0	0	0	0	0	0	0	0	0	0	0	0	0	0	0	0	0	0	0	0	0	0	0	0	0	0	0	0	0
	Gov Eq 2 (1)	-0.0626002	1.04688	0	-2.1235	0.0626002	0.953125	0	0	0	0	0	0	0	0	0	0	0	0	0	0	0	0	0	0	0	0	0	0	0	0	0	0	0	0	0	0	0	0
	Gov Eq 1 (2)	0	0	0.123244	0.0606439	-0.241933	0.00391251	0.119332	-0.0606439	0	0	0	0	0	0	0	0	0	0	0	0	0	0	0	0	0	0	0	0	0	0	0	0	0	0	0	0	0	0
	Gov Eq 2 (2)	0	0	-0.0606439	0.95314	0	-1.93804	0.0606439	0.865158	0	0	0	0	0	0	0	0	0	0	0	0	0	0	0	0	0	0	0	0	0	0	0	0	0	0	0	0	0	0
	Gov Eq 1 (3)	0	0	0	0	0.119332	0.0586877	-0.234129	0.00391251	0.115419	-0.0586877	0	0	0	0	0	0	0	0	0	0	0	0	0	0	0	0	0	0	0	0	0	0	0	0	0	0	0	0
	Gov Eq 2 (3)	0	0	0	0	-0.0586877	0.865173	0	-1.76393	0.0586877	0.782776	0	0	0	0	0	0	0	0	0	0	0	0	0	0	0	0	0	0	0	0	0	0	0	0	0	0	0	0
	Gov Eq 1 (4)	0	0	0	0	0	0	0.115419	0.0567314	-0.226325	0.00391251	0.111507	-0.0567314	0	0	0	0	0	0	0	0	0	0	0	0	0	0	0	0	0	0	0	0	0	0	0	0	0	0
	Gov Eq 2 (4)	0	0	0	0	0	0	-0.0567314	0.782791	0	-1.60079	0.0567314	0.705795	0	0	0	0	0	0	0	0	0	0	0	0	0	0	0	0	0	0	0	0	0	0	0	0	0	0
	Gov Eq 1 (5)	0	0	0	0	0	0	0	0	0.111507	0.0547751	-0.21852	0.00391251	0.107594	-0.0547751	0	0	0	0	0	0	0	0	0	0	0	0	0	0	0	0	0	0	0	0	0	0	0	0
	Gov Eq 2 (5)	0	0	0	0	0	0	0	0	-0.0547751	0.705811	0	-1.44826	0.0547751	0.634033	0	0	0	0	0	0	0	0	0	0	0	0	0	0	0	0	0	0	0	0	0	0	0	0
	Gov Eq 1 (6)	0	0	0	0	0	0	0	0	0	0	0.107594	0.0528189	-0.210716	0.00391251	0.103682	-0.0528189	0	0	0	0	0	0	0	0	0	0	0	0	0	0	0	0	0	0	0	0	0	0
	Gov Eq 2 (6)	0	0	0	0	0	0	0	0	0	0	-0.0528189	0.634048	0	-1.30597	0.0528189	0.567307	0	0	0	0	0	0	0	0	0	0	0	0	0	0	0	0	0	0	0	0	0	0
	Gov Eq 1 (7)	0	0	0	0	0	0	0	0	0	0	0	0	0.103682	0.0508626	-0.202912	0.00391251	0.099769	-0.0508626	0	0	0	0	0	0	0	0	0	0	0	0	0	0	0	0	0	0	0	0
	Gov Eq 2 (7)	0	0	0	0	0	0	0	0	0	0	0	0	-0.0508626	0.567322	0	-1.17357	0.0508626	0.505432	0	0	0	0	0	0	0	0	0	0	0	0	0	0	0	0	0	0	0	0
	Gov Eq 1 (8)	0	0	0	0	0	0	0	0	0	0	0	0	0	0	0.099769	0.0489064	-0.195107	0.00391251	0.0958565	-0.0489064	0	0	0	0	0	0	0	0	0	0	0	0	0	0	0	0	0	0
	Gov Eq 2 (8)	0	0	0	0	0	0	0	0	0	0	0	0	0	0	-0.0489064	0.505447	0	-1.05068	0.0489064	0.448227	0	0	0	0	0	0	0	0	0	0	0	0	0	0	0	0	0	0
	Gov Eq 1 (9)	0	0	0	0	0	0	0	0	0	0	0	0	0	0	0	0	0.0958565	0.0469501	-0.187303	0.00391251	0.091944	-0.0469501	0	0	0	0	0	0	0	0	0	0	0	0	0	0	0	0
	Gov Eq 2 (9)	0	0	0	0	0	0	0	0	0	0	0	0	0	0	0	0	-0.0469501	0.448242	0	-0.936934	0.0469501	0.395508	0	0	0	0	0	0	0	0	0	0	0	0	0	0	0	0
	Gov Eq 1 (10)	0	0	0	0	0	0	0	0	0	0	0	0	0	0	0	0	0	0	0.091944	0.0449939	-0.179499	0.00391251	0.0880315	-0.0449939	0	0	0	0	0	0	0	0	0	0	0	0	0	0
	Gov Eq 2 (10)	0	0	0	0	0	0	0	0	0	0	0	0	0	0	0	0	0	0	-0.0449939	0.395523	0	-0.831972	0.0449939	0.347092	0	0	0	0	0	0	0	0	0	0	0	0	0	0
	Gov Eq 1 (11)	0	0	0	0	0	0	0	0	0	0	0	0	0	0	0	0	0	0	0	0	0.0880315	0.0430376	-0.171695	0.00391251	0.084119	-0.0430376	0	0	0	0	0	0	0	0	0	0	0	0
	Gov Eq 2 (11)	0	0	0	0	0	0	0	0	0	0	0	0	0	0	0	0	0	0	0	0	-0.0430376	0.347107	0	-0.735426	0.0430376	0.302795	0	0	0	0	0	0	0	0	0	0	0	0
	Gov Eq 1 (12)	0	0	0	0	0	0	0	0	0	0	0	0	0	0	0	0	0	0	0	0	0	0	0.084119	0.0410814	-0.16389	0.00391251	0.0802065	-0.0410814	0	0	0	0	0	0	0	0	0	0
	Gov Eq 2 (12)	0	0	0	0	0	0	0	0	0	0	0	0	0	0	0	0	0	0	0	0	0	0	-0.0410814	0.302811	0	-0.646929	0.0410814	0.262436	0	0	0	0	0	0	0	0	0	0
	Gov Eq 1 (13)	0	0	0	0	0	0	0	0	0	0	0	0	0	0	0	0	0	0	0	0	0	0	0	0	0.0802065	0.0391251	-0.156086	0.00391251	0.0762939	-0.0391251	0	0	0	0	0	0	0	0
	Gov Eq 2 (13)	0	0	0	0	0	0	0	0	0	0	0	0	0	0	0	0	0	0	0	0	0	0	0	0	-0.0391251	0.262451	0	-0.566117	0.0391251	0.22583	0	0	0	0	0	0	0	0
	Gov Eq 1 (14)	0	0	0	0	0	0	0	0	0	0	0	0	0	0	0	0	0	0	0	0	0	0	0	0	0	0	0.0762939	0.0371688	-0.148282	0.00391251	0.0723814	-0.0371688	0	0	0	0	0	0
	Gov Eq 2 (14)	0	0	0	0	0	0	0	0	0	0	0	0	0	0	0	0	0	0	0	0	0	0	0	0	0	0	-0.0371688	0.225845	0	-0.492622	0.0371688	0.192795	0	0	0	0	0	0
	Gov Eq 1 (15)	0	0	0	0	0	0	0	0	0	0	0	0	0	0	0	0	0	0	0	0	0	0	0	0	0	0	0	0	0.0723814	0.0352126	-0.140477	0.00391251	0.0684689	-0.0352126	0	0	0	0
	Gov Eq 2 (15)	0	0	0	0	0	0	0	0	0	0	0	0	0	0	0	0	0	0	0	0	0	0	0	0	0	0	0	0	-0.0352126	0.19281	0	-0.42608	0.0352126	0.163147	0	0	0	0
	Gov Eq 1 (16)	0	0	0	0	0	0	0	0	0	0	0	0	0	0	0	0	0	0	0	0	0	0	0	0	0	0	0	0	0	0	0.0684689	0.0332563	-0.132673	0.00391251	0.0645564	-0.0332563	0	0
	Gov Eq 2 (16)	0	0	0	0	0	0	0	0	0	0	0	0	0	0	0	0	0	0	0	0	0	0	0	0	0	0	0	0	0	0	-0.0332563	0.163162	0	-0.366124	0.0332563	0.136703	0	0
	Gov Eq 1 (17)	0	0	0	0	0	0	0	0	0	0	0	0	0	0	0	0	0	0	0	0	0	0	0	0	0	0	0	0	0	0	0	0	0.0645564	0.0313001	-0.124869	0.00391251	0.0606439	-0.0313001
	Gov Eq 2 (17)	0	0	0	0	0	0	0	0	0	0	0	0	0	0	0	0	0	0	0	0	0	0	0	0	0	0	0	0	0	0	0	0	-0.0313001	0.136719	0	-0.312388	0.0313001	0.113281
	Bo Co 1 (1)	0	0	1	0	0	0	0	0	0	0	0	0	0	0	0	0	0	0	0	0	0	0	0	0	0	0	0	0	0	0	0	0	0	0	0	0	0	0
	Bo Co 2 (1)	0	1	0	0	0	-1	0	0	0	0	0	0	0	0	0	0	0	0	0	0	0	0	0	0	0	0	0	0	0	0	0	0	0	0	0	0	0	0
	Bo Co 1 (17)	0	0	0	0	0	0	0	0	0	0	0	0	0	0	0	0	0	0	0	0	0	0	0	0	0	0	0	0	0	0	0	0	0	0	1	0	0	0
	Bo Co 2 (17)	0	0	0	0	0	0	0	0	0	0	0	0	0	0	0	0	0	0	0	0	0	0	0	0	0	0	0	0	0	0	0	0	0	1	0	0	0	-1
	W-F FDM approximation
		25-point grid
	n =	24
		0.0416667
		0.0312
	kRIr =	0.01
		0.0556446
		6.51				Determinant =	1.73704e-06
					PSM	ABAQUS	9 pt	17 pt	25 pt
		0.000127737		0.0735765	6.4442	6.4740	7.03143	6.59239	6.51
		0.5
			Nodes	1		2		3		4		5		6		7		8		9		10		11		12		13		14		15		16		17		18		19		20		21		22		23
				0		0.0416667		0.0833333		0.125		0.166667		0.208333		0.25		0.291667		0.333333		0.375		0.416667		0.458333		0.5		0.541667		0.583333		0.625		0.666667		0.708333		0.75		0.791667		0.833333		0.875		0.916667
				1		0.938793		0.880136		0.823975		0.770255		0.718922		0.669922		0.623201		0.578704		0.536377		0.496166		0.458017		0.421875		0.387686		0.355396		0.324951		0.296296		0.269378		0.244141		0.220531		0.198495		0.177979		0.158927
				-0.0625		-0.059923		-0.0574002		-0.0549316		-0.0525174		-0.0501573		-0.0478516		-0.0456		-0.0434028		-0.0412598		-0.039171		-0.0371365		-0.0351562		-0.0332303		-0.0313585		-0.029541		-0.0277778		-0.0260688		-0.0244141		-0.0228136		-0.0212674		-0.0197754		-0.0183377
				1		0.979167		0.958333		0.9375		0.916667		0.895833		0.875		0.854167		0.833333		0.8125		0.791667		0.770833		0.75		0.729167		0.708333		0.6875		0.666667		0.645833		0.625		0.604167		0.583333		0.5625		0.541667
				-0.0208333		-0.0208333		-0.0208333		-0.0208333		-0.0208333		-0.0208333		-0.0208333		-0.0208333		-0.0208333		-0.0208333		-0.0208333		-0.0208333		-0.0208333		-0.0208333		-0.0208333		-0.0208333		-0.0208333		-0.0208333		-0.0208333		-0.0208333		-0.0208333		-0.0208333		-0.0208333
		W0	hkF0	W1	hkF1	W2	hkF2	W3	hkF3	W4	hkF4	W5	hkF5	W6	hkF6	W7	hkF7	W8	hkF8	W9	hkF9	W10	hkF10	W11	hkF11	W12	hkF12	W13	hkF13	W14	hkF14	W15	hkF15	W16	hkF16	W17	hkF17	W18	hkF18	W19	hkF19	W20	hkF20	W21	hkF21	W22	hkF22	W23	hkF23
	Gov Eq 1 (1)	0.0562242	0.0278223	-0.111161	0.00115926	0.055065	-0.0278223	0	0	0	0	0	0	0	0	0	0	0	0	0	0	0	0	0	0	0	0	0	0	0	0	0	0	0	0	0	0	0	0	0	0	0	0	0	0	0	0	0	0
	Gov Eq 2 (1)	-0.0278223	1.03125	0	-2.05491	0.0278223	0.96875	0	0	0	0	0	0	0	0	0	0	0	0	0	0	0	0	0	0	0	0	0	0	0	0	0	0	0	0	0	0	0	0	0	0	0	0	0	0	0	0	0	0
	Gov Eq 1 (2)	0	0	0.055065	0.0272427	-0.108846	0.00115926	0.0539057	-0.0272427	0	0	0	0	0	0	0	0	0	0	0	0	0	0	0	0	0	0	0	0	0	0	0	0	0	0	0	0	0	0	0	0	0	0	0	0	0	0	0	0
	Gov Eq 2 (2)	0	0	-0.0272427	0.968755	0	-1.93138	0.0272427	0.908832	0	0	0	0	0	0	0	0	0	0	0	0	0	0	0	0	0	0	0	0	0	0	0	0	0	0	0	0	0	0	0	0	0	0	0	0	0	0	0	0
	Gov Eq 1 (3)	0	0	0	0	0.0539057	0.026663	-0.10653	0.00115926	0.0527464	-0.026663	0	0	0	0	0	0	0	0	0	0	0	0	0	0	0	0	0	0	0	0	0	0	0	0	0	0	0	0	0	0	0	0	0	0	0	0	0	0
	Gov Eq 2 (3)	0	0	0	0	-0.026663	0.908836	0	-1.81295	0.026663	0.851436	0	0	0	0	0	0	0	0	0	0	0	0	0	0	0	0	0	0	0	0	0	0	0	0	0	0	0	0	0	0	0	0	0	0	0	0	0	0
	Gov Eq 1 (4)	0	0	0	0	0	0	0.0527464	0.0260834	-0.104214	0.00115926	0.0515872	-0.0260834	0	0	0	0	0	0	0	0	0	0	0	0	0	0	0	0	0	0	0	0	0	0	0	0	0	0	0	0	0	0	0	0	0	0	0	0
	Gov Eq 2 (4)	0	0	0	0	0	0	-0.0260834	0.85144	0	-1.69951	0.0260834	0.796509	0	0	0	0	0	0	0	0	0	0	0	0	0	0	0	0	0	0	0	0	0	0	0	0	0	0	0	0	0	0	0	0	0	0	0	0
	Gov Eq 1 (5)	0	0	0	0	0	0	0	0	0.0515872	0.0255038	-0.101898	0.00115926	0.0504279	-0.0255038	0	0	0	0	0	0	0	0	0	0	0	0	0	0	0	0	0	0	0	0	0	0	0	0	0	0	0	0	0	0	0	0	0	0
	Gov Eq 2 (5)	0	0	0	0	0	0	0	0	-0.0255038	0.796513	0	-1.59095	0.0255038	0.743996	0	0	0	0	0	0	0	0	0	0	0	0	0	0	0	0	0	0	0	0	0	0	0	0	0	0	0	0	0	0	0	0	0	0
	Gov Eq 1 (6)	0	0	0	0	0	0	0	0	0	0	0.0504279	0.0249241	-0.0995821	0.00115926	0.0492686	-0.0249241	0	0	0	0	0	0	0	0	0	0	0	0	0	0	0	0	0	0	0	0	0	0	0	0	0	0	0	0	0	0	0	0
	Gov Eq 2 (6)	0	0	0	0	0	0	0	0	0	0	-0.0249241	0.744	0	-1.48716	0.0249241	0.693843	0	0	0	0	0	0	0	0	0	0	0	0	0	0	0	0	0	0	0	0	0	0	0	0	0	0	0	0	0	0	0	0
	Gov Eq 1 (7)	0	0	0	0	0	0	0	0	0	0	0	0	0.0492686	0.0243445	-0.0972663	0.00115926	0.0481094	-0.0243445	0	0	0	0	0	0	0	0	0	0	0	0	0	0	0	0	0	0	0	0	0	0	0	0	0	0	0	0	0	0
	Gov Eq 2 (7)	0	0	0	0	0	0	0	0	0	0	0	0	-0.0243445	0.693848	0	-1.38804	0.0243445	0.645996	0	0	0	0	0	0	0	0	0	0	0	0	0	0	0	0	0	0	0	0	0	0	0	0	0	0	0	0	0	0
	Gov Eq 1 (8)	0	0	0	0	0	0	0	0	0	0	0	0	0	0	0.0481094	0.0237649	-0.0949504	0.00115926	0.0469501	-0.0237649	0	0	0	0	0	0	0	0	0	0	0	0	0	0	0	0	0	0	0	0	0	0	0	0	0	0	0	0
	Gov Eq 2 (8)	0	0	0	0	0	0	0	0	0	0	0	0	0	0	-0.0237649	0.646001	0	-1.29347	0.0237649	0.600401	0	0	0	0	0	0	0	0	0	0	0	0	0	0	0	0	0	0	0	0	0	0	0	0	0	0	0	0
	Gov Eq 1 (9)	0	0	0	0	0	0	0	0	0	0	0	0	0	0	0	0	0.0469501	0.0231852	-0.0926345	0.00115926	0.0457909	-0.0231852	0	0	0	0	0	0	0	0	0	0	0	0	0	0	0	0	0	0	0	0	0	0	0	0	0	0
	Gov Eq 2 (9)	0	0	0	0	0	0	0	0	0	0	0	0	0	0	0	0	-0.0231852	0.600405	0	-1.20335	0.0231852	0.557002	0	0	0	0	0	0	0	0	0	0	0	0	0	0	0	0	0	0	0	0	0	0	0	0	0	0
	Gov Eq 1 (10)	0	0	0	0	0	0	0	0	0	0	0	0	0	0	0	0	0	0	0.0457909	0.0226056	-0.0903187	0.00115926	0.0446316	-0.0226056	0	0	0	0	0	0	0	0	0	0	0	0	0	0	0	0	0	0	0	0	0	0	0	0
	Gov Eq 2 (10)	0	0	0	0	0	0	0	0	0	0	0	0	0	0	0	0	0	0	-0.0226056	0.557007	0	-1.11757	0.0226056	0.515747	0	0	0	0	0	0	0	0	0	0	0	0	0	0	0	0	0	0	0	0	0	0	0	0
	Gov Eq 1 (11)	0	0	0	0	0	0	0	0	0	0	0	0	0	0	0	0	0	0	0	0	0.0446316	0.022026	-0.0880028	0.00115926	0.0434723	-0.022026	0	0	0	0	0	0	0	0	0	0	0	0	0	0	0	0	0	0	0	0	0	0
	Gov Eq 2 (11)	0	0	0	0	0	0	0	0	0	0	0	0	0	0	0	0	0	0	0	0	-0.022026	0.515752	0	-1.03602	0.022026	0.476581	0	0	0	0	0	0	0	0	0	0	0	0	0	0	0	0	0	0	0	0	0	0
	Gov Eq 1 (12)	0	0	0	0	0	0	0	0	0	0	0	0	0	0	0	0	0	0	0	0	0	0	0.0434723	0.0214464	-0.0856869	0.00115926	0.0423131	-0.0214464	0	0	0	0	0	0	0	0	0	0	0	0	0	0	0	0	0	0	0	0
	Gov Eq 2 (12)	0	0	0	0	0	0	0	0	0	0	0	0	0	0	0	0	0	0	0	0	0	0	-0.0214464	0.476585	0	-0.958589	0.0214464	0.439449	0	0	0	0	0	0	0	0	0	0	0	0	0	0	0	0	0	0	0	0
	Gov Eq 1 (13)	0	0	0	0	0	0	0	0	0	0	0	0	0	0	0	0	0	0	0	0	0	0	0	0	0.0423131	0.0208667	-0.0833711	0.00115926	0.0411538	-0.0208667	0	0	0	0	0	0	0	0	0	0	0	0	0	0	0	0	0	0
	Gov Eq 2 (13)	0	0	0	0	0	0	0	0	0	0	0	0	0	0	0	0	0	0	0	0	0	0	0	0	-0.0208667	0.439453	0	-0.885173	0.0208667	0.404297	0	0	0	0	0	0	0	0	0	0	0	0	0	0	0	0	0	0
	Gov Eq 1 (14)	0	0	0	0	0	0	0	0	0	0	0	0	0	0	0	0	0	0	0	0	0	0	0	0	0	0	0.0411538	0.0202871	-0.0810552	0.00115926	0.0399945	-0.0202871	0	0	0	0	0	0	0	0	0	0	0	0	0	0	0	0
	Gov Eq 2 (14)	0	0	0	0	0	0	0	0	0	0	0	0	0	0	0	0	0	0	0	0	0	0	0	0	0	0	-0.0202871	0.404301	0	-0.815661	0.0202871	0.371071	0	0	0	0	0	0	0	0	0	0	0	0	0	0	0	0
	Gov Eq 1 (15)	0	0	0	0	0	0	0	0	0	0	0	0	0	0	0	0	0	0	0	0	0	0	0	0	0	0	0	0	0.0399945	0.0197075	-0.0787394	0.00115926	0.0388353	-0.0197075	0	0	0	0	0	0	0	0	0	0	0	0	0	0
	Gov Eq 2 (15)	0	0	0	0	0	0	0	0	0	0	0	0	0	0	0	0	0	0	0	0	0	0	0	0	0	0	0	0	-0.0197075	0.371076	0	-0.749946	0.0197075	0.339717	0	0	0	0	0	0	0	0	0	0	0	0	0	0
	Gov Eq 1 (16)	0	0	0	0	0	0	0	0	0	0	0	0	0	0	0	0	0	0	0	0	0	0	0	0	0	0	0	0	0	0	0.0388353	0.0191278	-0.0764235	0.00115926	0.037676	-0.0191278	0	0	0	0	0	0	0	0	0	0	0	0
	Gov Eq 2 (16)	0	0	0	0	0	0	0	0	0	0	0	0	0	0	0	0	0	0	0	0	0	0	0	0	0	0	0	0	0	0	-0.0191278	0.339722	0	-0.687919	0.0191278	0.310181	0	0	0	0	0	0	0	0	0	0	0	0
	Gov Eq 1 (17)	0	0	0	0	0	0	0	0	0	0	0	0	0	0	0	0	0	0	0	0	0	0	0	0	0	0	0	0	0	0	0	0	0.037676	0.0185482	-0.0741076	0.00115926	0.0365168	-0.0185482	0	0	0	0	0	0	0	0	0	0
	Gov Eq 2 (17)	0	0	0	0	0	0	0	0	0	0	0	0	0	0	0	0	0	0	0	0	0	0	0	0	0	0	0	0	0	0	0	0	-0.0185482	0.310185	0	-0.629471	0.0185482	0.282407	0	0	0	0	0	0	0	0	0	0
	Gov Eq 1 (18)	0	0	0	0	0	0	0	0	0	0	0	0	0	0	0	0	0	0	0	0	0	0	0	0	0	0	0	0	0	0	0	0	0	0	0.0365168	0.0179686	-0.0717918	0.00115926	0.0353575	-0.0179686	0	0	0	0	0	0	0	0
	Gov Eq 2 (18)	0	0	0	0	0	0	0	0	0	0	0	0	0	0	0	0	0	0	0	0	0	0	0	0	0	0	0	0	0	0	0	0	0	0	-0.0179686	0.282412	0	-0.574494	0.0179686	0.256343	0	0	0	0	0	0	0	0
	Gov Eq 1 (19)	0	0	0	0	0	0	0	0	0	0	0	0	0	0	0	0	0	0	0	0	0	0	0	0	0	0	0	0	0	0	0	0	0	0	0	0	0.0353575	0.0173889	-0.0694759	0.00115926	0.0341982	-0.0173889	0	0	0	0	0	0
	Gov Eq 2 (19)	0	0	0	0	0	0	0	0	0	0	0	0	0	0	0	0	0	0	0	0	0	0	0	0	0	0	0	0	0	0	0	0	0	0	0	0	-0.0173889	0.256348	0	-0.522879	0.0173889	0.231934	0	0	0	0	0	0
	Gov Eq 1 (20)	0	0	0	0	0	0	0	0	0	0	0	0	0	0	0	0	0	0	0	0	0	0	0	0	0	0	0	0	0	0	0	0	0	0	0	0	0	0	0.0341982	0.0168093	-0.06716	0.00115926	0.033039	-0.0168093	0	0	0	0
	Gov Eq 2 (20)	0	0	0	0	0	0	0	0	0	0	0	0	0	0	0	0	0	0	0	0	0	0	0	0	0	0	0	0	0	0	0	0	0	0	0	0	0	0	-0.0168093	0.231938	0	-0.474519	0.0168093	0.209125	0	0	0	0
	Gov Eq 1 (21)	0	0	0	0	0	0	0	0	0	0	0	0	0	0	0	0	0	0	0	0	0	0	0	0	0	0	0	0	0	0	0	0	0	0	0	0	0	0	0	0	0.033039	0.0162297	-0.0648442	0.00115926	0.0318797	-0.0162297	0	0
	Gov Eq 2 (21)	0	0	0	0	0	0	0	0	0	0	0	0	0	0	0	0	0	0	0	0	0	0	0	0	0	0	0	0	0	0	0	0	0	0	0	0	0	0	0	0	-0.0162297	0.209129	0	-0.429304	0.0162297	0.187862	0	0
	Gov Eq 1 (22)	0	0	0	0	0	0	0	0	0	0	0	0	0	0	0	0	0	0	0	0	0	0	0	0	0	0	0	0	0	0	0	0	0	0	0	0	0	0	0	0	0	0	0.0318797	0.01565	-0.0625283	0.00115926	0.0307204	-0.01565
	Gov Eq 2 (22)	0	0	0	0	0	0	0	0	0	0	0	0	0	0	0	0	0	0	0	0	0	0	0	0	0	0	0	0	0	0	0	0	0	0	0	0	0	0	0	0	0	0	-0.01565	0.187866	0	-0.387126	0.01565	0.168091
	Gov Eq 1 (23)	0	0	0	0	0	0	0	0	0	0	0	0	0	0	0	0	0	0	0	0	0	0	0	0	0	0	0	0	0	0	0	0	0	0	0	0	0	0	0	0	0	0	0	0	0.0307204	0.0150704	-0.0602124	0.00115926
	Gov Eq 2 (23)	0	0	0	0	0	0	0	0	0	0	0	0	0	0	0	0	0	0	0	0	0	0	0	0	0	0	0	0	0	0	0	0	0	0	0	0	0	0	0	0	0	0	0	0	-0.0150704	0.168095	0	-0.347877
	Gov Eq 1 (24)	0	0	0	0	0	0	0	0	0	0	0	0	0	0	0	0	0	0	0	0	0	0	0	0	0	0	0	0	0	0	0	0	0	0	0	0	0	0	0	0	0	0	0	0	0	0	0.0295612	0.0144908
	Gov Eq 2 (24)	0	0	0	0	0	0	0	0	0	0	0	0	0	0	0	0	0	0	0	0	0	0	0	0	0	0	0	0	0	0	0	0	0	0	0	0	0	0	0	0	0	0	0	0	0	0	-0.0144908	0.149762
	Gov Eq 1 (25)	0	0	0	0	0	0	0	0	0	0	0	0	0	0	0	0	0	0	0	0	0	0	0	0	0	0	0	0	0	0	0	0	0	0	0	0	0	0	0	0	0	0	0	0	0	0	0	0
	Gov Eq 2 (25)	0	0	0	0	0	0	0	0	0	0	0	0	0	0	0	0	0	0	0	0	0	0	0	0	0	0	0	0	0	0	0	0	0	0	0	0	0	0	0	0	0	0	0	0	0	0	0	0
	Bo Co 1 (1)	0	0	1	0	0	0	0	0	0	0	0	0	0	0	0	0	0	0	0	0	0	0	0	0	0	0	0	0	0	0	0	0	0	0	0	0	0	0	0	0	0	0	0	0	0	0	0	0
	Bo Co 2 (1)	0	1	0	0	0	-1	0	0	0	0	0	0	0	0	0	0	0	0	0	0	0	0	0	0	0	0	0	0	0	0	0	0	0	0	0	0	0	0	0	0	0	0	0	0	0	0	0	0
	Bo Co 1 (25)	0	0	0	0	0	0	0	0	0	0	0	0	0	0	0	0	0	0	0	0	0	0	0	0	0	0	0	0	0	0	0	0	0	0	0	0	0	0	0	0	0	0	0	0	0	0	0	0
	Bo Co 2 (25)	0	0	0	0	0	0	0	0	0	0	0	0	0	0	0	0	0	0	0	0	0	0	0	0	0	0	0	0	0	0	0	0	0	0	0	0	0	0	0	0	0	0	0	0	0	0	0	0
	W-F FDM approximation
		33-point grid
	n =	32
		0.03125
		0.0312
	kRIr =	0.01
		0.0313001
		6.48118				Determinant =	-5.29275e-09
					PSM	ABAQUS	9 pt	17 pt	25 pt	33 pt
		4.00597e-05		0.0410211	6.4442	6.4740	7.03143	6.59239	6.51	6.48118
		0.5
			Nodes	1		2		3		4		5		6		7		8		9		10		11		12		13		14		15		16		17		18		19		20		21		22		23
				0		0.03125		0.0625		0.09375		0.125		0.15625		0.1875		0.21875		0.25		0.28125		0.3125		0.34375		0.375		0.40625		0.4375		0.46875		0.5		0.53125		0.5625		0.59375		0.625		0.65625		0.6875
				1		0.953854		0.909149		0.865864		0.823975		0.783459		0.744293		0.706455		0.669922		0.63467		0.600677		0.567921		0.536377		0.506023		0.476837		0.448795		0.421875		0.396053		0.371307		0.347614		0.324951		0.303295		0.282623
				-0.046875		-0.0454216		-0.0439911		-0.0425835		-0.0411987		-0.0398369		-0.0384979		-0.0371819		-0.0358887		-0.0346184		-0.033371		-0.0321465		-0.0309448		-0.0297661		-0.0286102		-0.0274773		-0.0263672		-0.02528		-0.0242157		-0.0231743		-0.0221558		-0.0211601		-0.0201874
				1		0.984375		0.96875		0.953125		0.9375		0.921875		0.90625		0.890625		0.875		0.859375		0.84375		0.828125		0.8125		0.796875		0.78125		0.765625		0.75		0.734375		0.71875		0.703125		0.6875		0.671875		0.65625
				-0.015625		-0.015625		-0.015625		-0.015625		-0.015625		-0.015625		-0.015625		-0.015625		-0.015625		-0.015625		-0.015625		-0.015625		-0.015625		-0.015625		-0.015625		-0.015625		-0.015625		-0.015625		-0.015625		-0.015625		-0.015625		-0.015625		-0.015625
		W0	hkF0	W1	hkF1	W2	hkF2	W3	hkF3	W4	hkF4	W5	hkF5	W6	hkF6	W7	hkF7	W8	hkF8	W9	hkF9	W10	hkF10	W11	hkF11	W12	hkF12	W13	hkF13	W14	hkF14	W15	hkF15	W16	hkF16	W17	hkF17	W18	hkF18	W19	hkF19	W20	hkF20	W21	hkF21	W22	hkF22	W23	hkF23
	Gov Eq 1 (1)	0.0315446	0.01565	-0.0625601	0.000489064	0.0310555	-0.01565	0	0	0	0	0	0	0	0	0	0	0	0	0	0	0	0	0	0	0	0	0	0	0	0	0	0	0	0	0	0	0	0	0	0	0	0	0	0	0	0	0	0
	Gov Eq 2 (1)	-0.01565	1.02344	0	-2.03089	0.01565	0.976562	0	0	0	0	0	0	0	0	0	0	0	0	0	0	0	0	0	0	0	0	0	0	0	0	0	0	0	0	0	0	0	0	0	0	0	0	0	0	0	0	0	0
	Gov Eq 1 (2)	0	0	0.0310555	0.0154055	-0.0615826	0.000489064	0.0305665	-0.0154055	0	0	0	0	0	0	0	0	0	0	0	0	0	0	0	0	0	0	0	0	0	0	0	0	0	0	0	0	0	0	0	0	0	0	0	0	0	0	0	0
	Gov Eq 2 (2)	0	0	-0.0154055	0.976564	0	-1.93813	0.0154055	0.931143	0	0	0	0	0	0	0	0	0	0	0	0	0	0	0	0	0	0	0	0	0	0	0	0	0	0	0	0	0	0	0	0	0	0	0	0	0	0	0	0
	Gov Eq 1 (3)	0	0	0	0	0.0305665	0.015161	-0.0606051	0.000489064	0.0300774	-0.015161	0	0	0	0	0	0	0	0	0	0	0	0	0	0	0	0	0	0	0	0	0	0	0	0	0	0	0	0	0	0	0	0	0	0	0	0	0	0
	Gov Eq 2 (3)	0	0	0	0	-0.015161	0.931145	0	-1.84825	0.015161	0.887154	0	0	0	0	0	0	0	0	0	0	0	0	0	0	0	0	0	0	0	0	0	0	0	0	0	0	0	0	0	0	0	0	0	0	0	0	0	0
	Gov Eq 1 (4)	0	0	0	0	0	0	0.0300774	0.0149164	-0.0596276	0.000489064	0.0295884	-0.0149164	0	0	0	0	0	0	0	0	0	0	0	0	0	0	0	0	0	0	0	0	0	0	0	0	0	0	0	0	0	0	0	0	0	0	0	0
	Gov Eq 2 (4)	0	0	0	0	0	0	-0.0149164	0.887156	0	-1.76121	0.0149164	0.844572	0	0	0	0	0	0	0	0	0	0	0	0	0	0	0	0	0	0	0	0	0	0	0	0	0	0	0	0	0	0	0	0	0	0	0	0
	Gov Eq 1 (5)	0	0	0	0	0	0	0	0	0.0295884	0.0146719	-0.0586501	0.000489064	0.0290993	-0.0146719	0	0	0	0	0	0	0	0	0	0	0	0	0	0	0	0	0	0	0	0	0	0	0	0	0	0	0	0	0	0	0	0	0	0
	Gov Eq 2 (5)	0	0	0	0	0	0	0	0	-0.0146719	0.844574	0	-1.67696	0.0146719	0.803375	0	0	0	0	0	0	0	0	0	0	0	0	0	0	0	0	0	0	0	0	0	0	0	0	0	0	0	0	0	0	0	0	0	0
	Gov Eq 1 (6)	0	0	0	0	0	0	0	0	0	0	0.0290993	0.0144274	-0.0576726	0.000489064	0.0286102	-0.0144274	0	0	0	0	0	0	0	0	0	0	0	0	0	0	0	0	0	0	0	0	0	0	0	0	0	0	0	0	0	0	0	0
	Gov Eq 2 (6)	0	0	0	0	0	0	0	0	0	0	-0.0144274	0.803377	0	-1.59545	0.0144274	0.76354	0	0	0	0	0	0	0	0	0	0	0	0	0	0	0	0	0	0	0	0	0	0	0	0	0	0	0	0	0	0	0	0
	Gov Eq 1 (7)	0	0	0	0	0	0	0	0	0	0	0	0	0.0286102	0.0141828	-0.0566951	0.000489064	0.0281212	-0.0141828	0	0	0	0	0	0	0	0	0	0	0	0	0	0	0	0	0	0	0	0	0	0	0	0	0	0	0	0	0	0
	Gov Eq 2 (7)	0	0	0	0	0	0	0	0	0	0	0	0	-0.0141828	0.763542	0	-1.51665	0.0141828	0.725044	0	0	0	0	0	0	0	0	0	0	0	0	0	0	0	0	0	0	0	0	0	0	0	0	0	0	0	0	0	0
	Gov Eq 1 (8)	0	0	0	0	0	0	0	0	0	0	0	0	0	0	0.0281212	0.0139383	-0.0557176	0.000489064	0.0276321	-0.0139383	0	0	0	0	0	0	0	0	0	0	0	0	0	0	0	0	0	0	0	0	0	0	0	0	0	0	0	0
	Gov Eq 2 (8)	0	0	0	0	0	0	0	0	0	0	0	0	0	0	-0.0139383	0.725046	0	-1.4405	0.0139383	0.687864	0	0	0	0	0	0	0	0	0	0	0	0	0	0	0	0	0	0	0	0	0	0	0	0	0	0	0	0
	Gov Eq 1 (9)	0	0	0	0	0	0	0	0	0	0	0	0	0	0	0	0	0.0276321	0.0136938	-0.0547401	0.000489064	0.027143	-0.0136938	0	0	0	0	0	0	0	0	0	0	0	0	0	0	0	0	0	0	0	0	0	0	0	0	0	0
	Gov Eq 2 (9)	0	0	0	0	0	0	0	0	0	0	0	0	0	0	0	0	-0.0136938	0.687866	0	-1.36696	0.0136938	0.651978	0	0	0	0	0	0	0	0	0	0	0	0	0	0	0	0	0	0	0	0	0	0	0	0	0	0
	Gov Eq 1 (10)	0	0	0	0	0	0	0	0	0	0	0	0	0	0	0	0	0	0	0.027143	0.0134493	-0.0537626	0.000489064	0.026654	-0.0134493	0	0	0	0	0	0	0	0	0	0	0	0	0	0	0	0	0	0	0	0	0	0	0	0
	Gov Eq 2 (10)	0	0	0	0	0	0	0	0	0	0	0	0	0	0	0	0	0	0	-0.0134493	0.651979	0	-1.29598	0.0134493	0.617361	0	0	0	0	0	0	0	0	0	0	0	0	0	0	0	0	0	0	0	0	0	0	0	0
	Gov Eq 1 (11)	0	0	0	0	0	0	0	0	0	0	0	0	0	0	0	0	0	0	0	0	0.026654	0.0132047	-0.0527851	0.000489064	0.0261649	-0.0132047	0	0	0	0	0	0	0	0	0	0	0	0	0	0	0	0	0	0	0	0	0	0
	Gov Eq 2 (11)	0	0	0	0	0	0	0	0	0	0	0	0	0	0	0	0	0	0	0	0	-0.0132047	0.617363	0	-1.22752	0.0132047	0.583992	0	0	0	0	0	0	0	0	0	0	0	0	0	0	0	0	0	0	0	0	0	0
	Gov Eq 1 (12)	0	0	0	0	0	0	0	0	0	0	0	0	0	0	0	0	0	0	0	0	0	0	0.0261649	0.0129602	-0.0518076	0.000489064	0.0256758	-0.0129602	0	0	0	0	0	0	0	0	0	0	0	0	0	0	0	0	0	0	0	0
	Gov Eq 2 (12)	0	0	0	0	0	0	0	0	0	0	0	0	0	0	0	0	0	0	0	0	0	0	-0.0129602	0.583994	0	-1.16153	0.0129602	0.551847	0	0	0	0	0	0	0	0	0	0	0	0	0	0	0	0	0	0	0	0
	Gov Eq 1 (13)	0	0	0	0	0	0	0	0	0	0	0	0	0	0	0	0	0	0	0	0	0	0	0	0	0.0256758	0.0127157	-0.0508301	0.000489064	0.0251868	-0.0127157	0	0	0	0	0	0	0	0	0	0	0	0	0	0	0	0	0	0
	Gov Eq 2 (13)	0	0	0	0	0	0	0	0	0	0	0	0	0	0	0	0	0	0	0	0	0	0	0	0	-0.0127157	0.551849	0	-1.09797	0.0127157	0.520905	0	0	0	0	0	0	0	0	0	0	0	0	0	0	0	0	0	0
	Gov Eq 1 (14)	0	0	0	0	0	0	0	0	0	0	0	0	0	0	0	0	0	0	0	0	0	0	0	0	0	0	0.0251868	0.0124711	-0.0498526	0.000489064	0.0246977	-0.0124711	0	0	0	0	0	0	0	0	0	0	0	0	0	0	0	0
	Gov Eq 2 (14)	0	0	0	0	0	0	0	0	0	0	0	0	0	0	0	0	0	0	0	0	0	0	0	0	0	0	-0.0124711	0.520906	0	-1.03678	0.0124711	0.49114	0	0	0	0	0	0	0	0	0	0	0	0	0	0	0	0
	Gov Eq 1 (15)	0	0	0	0	0	0	0	0	0	0	0	0	0	0	0	0	0	0	0	0	0	0	0	0	0	0	0	0	0.0246977	0.0122266	-0.0488751	0.000489064	0.0242087	-0.0122266	0	0	0	0	0	0	0	0	0	0	0	0	0	0
	Gov Eq 2 (15)	0	0	0	0	0	0	0	0	0	0	0	0	0	0	0	0	0	0	0	0	0	0	0	0	0	0	0	0	-0.0122266	0.491142	0	-0.977932	0.0122266	0.462532	0	0	0	0	0	0	0	0	0	0	0	0	0	0
	Gov Eq 1 (16)	0	0	0	0	0	0	0	0	0	0	0	0	0	0	0	0	0	0	0	0	0	0	0	0	0	0	0	0	0	0	0.0242087	0.0119821	-0.0478976	0.000489064	0.0237196	-0.0119821	0	0	0	0	0	0	0	0	0	0	0	0
	Gov Eq 2 (16)	0	0	0	0	0	0	0	0	0	0	0	0	0	0	0	0	0	0	0	0	0	0	0	0	0	0	0	0	0	0	-0.0119821	0.462534	0	-0.921371	0.0119821	0.435057	0	0	0	0	0	0	0	0	0	0	0	0
	Gov Eq 1 (17)	0	0	0	0	0	0	0	0	0	0	0	0	0	0	0	0	0	0	0	0	0	0	0	0	0	0	0	0	0	0	0	0	0.0237196	0.0117375	-0.0469201	0.000489064	0.0232305	-0.0117375	0	0	0	0	0	0	0	0	0	0
	Gov Eq 2 (17)	0	0	0	0	0	0	0	0	0	0	0	0	0	0	0	0	0	0	0	0	0	0	0	0	0	0	0	0	0	0	0	0	-0.0117375	0.435059	0	-0.867052	0.0117375	0.408691	0	0	0	0	0	0	0	0	0	0
	Gov Eq 1 (18)	0	0	0	0	0	0	0	0	0	0	0	0	0	0	0	0	0	0	0	0	0	0	0	0	0	0	0	0	0	0	0	0	0	0	0.0232305	0.011493	-0.0459426	0.000489064	0.0227415	-0.011493	0	0	0	0	0	0	0	0
	Gov Eq 2 (18)	0	0	0	0	0	0	0	0	0	0	0	0	0	0	0	0	0	0	0	0	0	0	0	0	0	0	0	0	0	0	0	0	0	0	-0.011493	0.408693	0	-0.81493	0.011493	0.383413	0	0	0	0	0	0	0	0
	Gov Eq 1 (19)	0	0	0	0	0	0	0	0	0	0	0	0	0	0	0	0	0	0	0	0	0	0	0	0	0	0	0	0	0	0	0	0	0	0	0	0	0.0227415	0.0112485	-0.0449651	0.000489064	0.0222524	-0.0112485	0	0	0	0	0	0
	Gov Eq 2 (19)	0	0	0	0	0	0	0	0	0	0	0	0	0	0	0	0	0	0	0	0	0	0	0	0	0	0	0	0	0	0	0	0	0	0	0	0	-0.0112485	0.383415	0	-0.764959	0.0112485	0.3592	0	0	0	0	0	0
	Gov Eq 1 (20)	0	0	0	0	0	0	0	0	0	0	0	0	0	0	0	0	0	0	0	0	0	0	0	0	0	0	0	0	0	0	0	0	0	0	0	0	0	0	0.0222524	0.0110039	-0.0439876	0.000489064	0.0217633	-0.0110039	0	0	0	0
	Gov Eq 2 (20)	0	0	0	0	0	0	0	0	0	0	0	0	0	0	0	0	0	0	0	0	0	0	0	0	0	0	0	0	0	0	0	0	0	0	0	0	0	0	-0.0110039	0.359201	0	-0.717094	0.0110039	0.336027	0	0	0	0
	Gov Eq 1 (21)	0	0	0	0	0	0	0	0	0	0	0	0	0	0	0	0	0	0	0	0	0	0	0	0	0	0	0	0	0	0	0	0	0	0	0	0	0	0	0	0	0.0217633	0.0107594	-0.0430101	0.000489064	0.0212743	-0.0107594	0	0
	Gov Eq 2 (21)	0	0	0	0	0	0	0	0	0	0	0	0	0	0	0	0	0	0	0	0	0	0	0	0	0	0	0	0	0	0	0	0	0	0	0	0	0	0	0	0	-0.0107594	0.336029	0	-0.671288	0.0107594	0.313873	0	0
	Gov Eq 1 (22)	0	0	0	0	0	0	0	0	0	0	0	0	0	0	0	0	0	0	0	0	0	0	0	0	0	0	0	0	0	0	0	0	0	0	0	0	0	0	0	0	0	0	0.0212743	0.0105149	-0.0420326	0.000489064	0.0207852	-0.0105149
	Gov Eq 2 (22)	0	0	0	0	0	0	0	0	0	0	0	0	0	0	0	0	0	0	0	0	0	0	0	0	0	0	0	0	0	0	0	0	0	0	0	0	0	0	0	0	0	0	-0.0105149	0.313875	0	-0.627496	0.0105149	0.292715
	Gov Eq 1 (23)	0	0	0	0	0	0	0	0	0	0	0	0	0	0	0	0	0	0	0	0	0	0	0	0	0	0	0	0	0	0	0	0	0	0	0	0	0	0	0	0	0	0	0	0	0.0207852	0.0102703	-0.0410551	0.000489064
	Gov Eq 2 (23)	0	0	0	0	0	0	0	0	0	0	0	0	0	0	0	0	0	0	0	0	0	0	0	0	0	0	0	0	0	0	0	0	0	0	0	0	0	0	0	0	0	0	0	0	-0.0102703	0.292717	0	-0.585671
	Gov Eq 1 (24)	0	0	0	0	0	0	0	0	0	0	0	0	0	0	0	0	0	0	0	0	0	0	0	0	0	0	0	0	0	0	0	0	0	0	0	0	0	0	0	0	0	0	0	0	0	0	0.0202961	0.0100258
	Gov Eq 2 (24)	0	0	0	0	0	0	0	0	0	0	0	0	0	0	0	0	0	0	0	0	0	0	0	0	0	0	0	0	0	0	0	0	0	0	0	0	0	0	0	0	0	0	0	0	0	0	-0.0100258	0.272532
	Gov Eq 1 (25)	0	0	0	0	0	0	0	0	0	0	0	0	0	0	0	0	0	0	0	0	0	0	0	0	0	0	0	0	0	0	0	0	0	0	0	0	0	0	0	0	0	0	0	0	0	0	0	0
	Gov Eq 2 (25)	0	0	0	0	0	0	0	0	0	0	0	0	0	0	0	0	0	0	0	0	0	0	0	0	0	0	0	0	0	0	0	0	0	0	0	0	0	0	0	0	0	0	0	0	0	0	0	0
	Gov Eq 1 (26)	0	0	0	0	0	0	0	0	0	0	0	0	0	0	0	0	0	0	0	0	0	0	0	0	0	0	0	0	0	0	0	0	0	0	0	0	0	0	0	0	0	0	0	0	0	0	0	0
	Gov Eq 2 (26)	0	0	0	0	0	0	0	0	0	0	0	0	0	0	0	0	0	0	0	0	0	0	0	0	0	0	0	0	0	0	0	0	0	0	0	0	0	0	0	0	0	0	0	0	0	0	0	0
	Gov Eq 1 (27)	0	0	0	0	0	0	0	0	0	0	0	0	0	0	0	0	0	0	0	0	0	0	0	0	0	0	0	0	0	0	0	0	0	0	0	0	0	0	0	0	0	0	0	0	0	0	0	0
	Gov Eq 2 (27)	0	0	0	0	0	0	0	0	0	0	0	0	0	0	0	0	0	0	0	0	0	0	0	0	0	0	0	0	0	0	0	0	0	0	0	0	0	0	0	0	0	0	0	0	0	0	0	0
	Gov Eq 1 (28)	0	0	0	0	0	0	0	0	0	0	0	0	0	0	0	0	0	0	0	0	0	0	0	0	0	0	0	0	0	0	0	0	0	0	0	0	0	0	0	0	0	0	0	0	0	0	0	0
	Gov Eq 2 (28)	0	0	0	0	0	0	0	0	0	0	0	0	0	0	0	0	0	0	0	0	0	0	0	0	0	0	0	0	0	0	0	0	0	0	0	0	0	0	0	0	0	0	0	0	0	0	0	0
	Gov Eq 1 (29)	0	0	0	0	0	0	0	0	0	0	0	0	0	0	0	0	0	0	0	0	0	0	0	0	0	0	0	0	0	0	0	0	0	0	0	0	0	0	0	0	0	0	0	0	0	0	0	0
	Gov Eq 2 (29)	0	0	0	0	0	0	0	0	0	0	0	0	0	0	0	0	0	0	0	0	0	0	0	0	0	0	0	0	0	0	0	0	0	0	0	0	0	0	0	0	0	0	0	0	0	0	0	0
	Gov Eq 1 (30)	0	0	0	0	0	0	0	0	0	0	0	0	0	0	0	0	0	0	0	0	0	0	0	0	0	0	0	0	0	0	0	0	0	0	0	0	0	0	0	0	0	0	0	0	0	0	0	0
	Gov Eq 2 (30)	0	0	0	0	0	0	0	0	0	0	0	0	0	0	0	0	0	0	0	0	0	0	0	0	0	0	0	0	0	0	0	0	0	0	0	0	0	0	0	0	0	0	0	0	0	0	0	0
	Gov Eq 1 (31)	0	0	0	0	0	0	0	0	0	0	0	0	0	0	0	0	0	0	0	0	0	0	0	0	0	0	0	0	0	0	0	0	0	0	0	0	0	0	0	0	0	0	0	0	0	0	0	0
	Gov Eq 2 (31)	0	0	0	0	0	0	0	0	0	0	0	0	0	0	0	0	0	0	0	0	0	0	0	0	0	0	0	0	0	0	0	0	0	0	0	0	0	0	0	0	0	0	0	0	0	0	0	0
	Gov Eq 1 (32)	0	0	0	0	0	0	0	0	0	0	0	0	0	0	0	0	0	0	0	0	0	0	0	0	0	0	0	0	0	0	0	0	0	0	0	0	0	0	0	0	0	0	0	0	0	0	0	0
	Gov Eq 2 (32)	0	0	0	0	0	0	0	0	0	0	0	0	0	0	0	0	0	0	0	0	0	0	0	0	0	0	0	0	0	0	0	0	0	0	0	0	0	0	0	0	0	0	0	0	0	0	0	0
	Gov Eq 1 (33)	0	0	0	0	0	0	0	0	0	0	0	0	0	0	0	0	0	0	0	0	0	0	0	0	0	0	0	0	0	0	0	0	0	0	0	0	0	0	0	0	0	0	0	0	0	0	0	0
	Gov Eq 2 (33)	0	0	0	0	0	0	0	0	0	0	0	0	0	0	0	0	0	0	0	0	0	0	0	0	0	0	0	0	0	0	0	0	0	0	0	0	0	0	0	0	0	0	0	0	0	0	0	0
	Bo Co 1 (1)	0	0	1	0	0	0	0	0	0	0	0	0	0	0	0	0	0	0	0	0	0	0	0	0	0	0	0	0	0	0	0	0	0	0	0	0	0	0	0	0	0	0	0	0	0	0	0	0
	Bo Co 2 (1)	0	1	0	0	0	-1	0	0	0	0	0	0	0	0	0	0	0	0	0	0	0	0	0	0	0	0	0	0	0	0	0	0	0	0	0	0	0	0	0	0	0	0	0	0	0	0	0	0
	Bo Co 1 (33)	0	0	0	0	0	0	0	0	0	0	0	0	0	0	0	0	0	0	0	0	0	0	0	0	0	0	0	0	0	0	0	0	0	0	0	0	0	0	0	0	0	0	0	0	0	0	0	0
	Bo Co 2 (33)	0	0	0	0	0	0	0	0	0	0	0	0	0	0	0	0	0	0	0	0	0	0	0	0	0	0	0	0	0	0	0	0	0	0	0	0	0	0	0	0	0	0	0	0	0	0	0	0
	W-F FDM approximation
		41-point grid
	n =	40
		0.025
		0.0312
	kRIr =	0.01
		0.0200321
		6.46785				Determinant =	-6.35127e-05
					PSM	ABAQUS	9 pt	17 pt	25 pt	33 pt	41
		1.6341e-05		0.0261456	6.4442	6.4740	7.03143	6.59239	6.51	6.48118	6.46785
		0.5
			Nodes	1		2		3		4		5		6		7		8		9		10		11		12		13		14		15		16		17		18		19		20		21		22		23
				0		0.025		0.05		0.075		0.1		0.125		0.15		0.175		0.2		0.225		0.25		0.275		0.3		0.325		0.35		0.375		0.4		0.425		0.45		0.475		0.5		0.525		0.55
				1		0.962967		0.926859		0.891666		0.857375		0.823975		0.791453		0.759799		0.729		0.699045		0.669922		0.641619		0.614125		0.587428		0.561516		0.536377		0.512		0.488373		0.465484		0.443322		0.421875		0.401131		0.381078
				-0.0375		-0.0365684		-0.0356484		-0.0347402		-0.0338438		-0.032959		-0.0320859		-0.0312246		-0.030375		-0.0295371		-0.0287109		-0.0278965		-0.0270937		-0.0263027		-0.0255234		-0.0247559		-0.024		-0.0232559		-0.0225234		-0.0218027		-0.0210938		-0.0203965		-0.0197109
				1		0.9875		0.975		0.9625		0.95		0.9375		0.925		0.9125		0.9		0.8875		0.875		0.8625		0.85		0.8375		0.825		0.8125		0.8		0.7875		0.775		0.7625		0.75		0.7375		0.725
				-0.0125		-0.0125		-0.0125		-0.0125		-0.0125		-0.0125		-0.0125		-0.0125		-0.0125		-0.0125		-0.0125		-0.0125		-0.0125		-0.0125		-0.0125		-0.0125		-0.0125		-0.0125		-0.0125		-0.0125		-0.0125		-0.0125		-0.0125
		W0	hkF0	W1	hkF1	W2	hkF2	W3	hkF3	W4	hkF4	W5	hkF5	W6	hkF6	W7	hkF7	W8	hkF8	W9	hkF9	W10	hkF10	W11	hkF11	W12	hkF12	W13	hkF13	W14	hkF14	W15	hkF15	W16	hkF16	W17	hkF17	W18	hkF18	W19	hkF19	W20	hkF20	W21	hkF21	W22	hkF22	W23	hkF23
	Gov Eq 1 (1)	0.0201573	0.010016	-0.0400478	0.000250401	0.0199069	-0.010016	0	0	0	0	0	0	0	0	0	0	0	0	0	0	0	0	0	0	0	0	0	0	0	0	0	0	0	0	0	0	0	0	0	0	0	0	0	0	0	0	0	0
	Gov Eq 2 (1)	-0.010016	1.01875	0	-2.01977	0.010016	0.98125	0	0	0	0	0	0	0	0	0	0	0	0	0	0	0	0	0	0	0	0	0	0	0	0	0	0	0	0	0	0	0	0	0	0	0	0	0	0	0	0	0	0
	Gov Eq 1 (2)	0	0	0.0199069	0.00989083	-0.0395472	0.000250401	0.0196565	-0.00989083	0	0	0	0	0	0	0	0	0	0	0	0	0	0	0	0	0	0	0	0	0	0	0	0	0	0	0	0	0	0	0	0	0	0	0	0	0	0	0	0
	Gov Eq 2 (2)	0	0	-0.00989083	0.981251	0	-1.94546	0.00989083	0.944683	0	0	0	0	0	0	0	0	0	0	0	0	0	0	0	0	0	0	0	0	0	0	0	0	0	0	0	0	0	0	0	0	0	0	0	0	0	0	0	0
	Gov Eq 1 (3)	0	0	0	0	0.0196565	0.00976562	-0.0390466	0.000250401	0.019406	-0.00976562	0	0	0	0	0	0	0	0	0	0	0	0	0	0	0	0	0	0	0	0	0	0	0	0	0	0	0	0	0	0	0	0	0	0	0	0	0	0
	Gov Eq 2 (3)	0	0	0	0	-0.00976562	0.944684	0	-1.87301	0.00976562	0.909035	0	0	0	0	0	0	0	0	0	0	0	0	0	0	0	0	0	0	0	0	0	0	0	0	0	0	0	0	0	0	0	0	0	0	0	0	0	0
	Gov Eq 1 (4)	0	0	0	0	0	0	0.019406	0.00964042	-0.038546	0.000250401	0.0191556	-0.00964042	0	0	0	0	0	0	0	0	0	0	0	0	0	0	0	0	0	0	0	0	0	0	0	0	0	0	0	0	0	0	0	0	0	0	0	0
	Gov Eq 2 (4)	0	0	0	0	0	0	-0.00964042	0.909036	0	-1.80238	0.00964042	0.874296	0	0	0	0	0	0	0	0	0	0	0	0	0	0	0	0	0	0	0	0	0	0	0	0	0	0	0	0	0	0	0	0	0	0	0	0
	Gov Eq 1 (5)	0	0	0	0	0	0	0	0	0.0191556	0.00951522	-0.0380454	0.000250401	0.0189052	-0.00951522	0	0	0	0	0	0	0	0	0	0	0	0	0	0	0	0	0	0	0	0	0	0	0	0	0	0	0	0	0	0	0	0	0	0
	Gov Eq 2 (5)	0	0	0	0	0	0	0	0	-0.00951522	0.874297	0	-1.73356	0.00951522	0.840453	0	0	0	0	0	0	0	0	0	0	0	0	0	0	0	0	0	0	0	0	0	0	0	0	0	0	0	0	0	0	0	0	0	0
	Gov Eq 1 (6)	0	0	0	0	0	0	0	0	0	0	0.0189052	0.00939002	-0.0375448	0.000250401	0.0186548	-0.00939002	0	0	0	0	0	0	0	0	0	0	0	0	0	0	0	0	0	0	0	0	0	0	0	0	0	0	0	0	0	0	0	0
	Gov Eq 2 (6)	0	0	0	0	0	0	0	0	0	0	-0.00939002	0.840454	0	-1.66651	0.00939002	0.807495	0	0	0	0	0	0	0	0	0	0	0	0	0	0	0	0	0	0	0	0	0	0	0	0	0	0	0	0	0	0	0	0
	Gov Eq 1 (7)	0	0	0	0	0	0	0	0	0	0	0	0	0.0186548	0.00926482	-0.0370442	0.000250401	0.0184044	-0.00926482	0	0	0	0	0	0	0	0	0	0	0	0	0	0	0	0	0	0	0	0	0	0	0	0	0	0	0	0	0	0
	Gov Eq 2 (7)	0	0	0	0	0	0	0	0	0	0	0	0	-0.00926482	0.807496	0	-1.60123	0.00926482	0.77541	0	0	0	0	0	0	0	0	0	0	0	0	0	0	0	0	0	0	0	0	0	0	0	0	0	0	0	0	0	0
	Gov Eq 1 (8)	0	0	0	0	0	0	0	0	0	0	0	0	0	0	0.0184044	0.00913962	-0.0365436	0.000250401	0.018154	-0.00913962	0	0	0	0	0	0	0	0	0	0	0	0	0	0	0	0	0	0	0	0	0	0	0	0	0	0	0	0
	Gov Eq 2 (8)	0	0	0	0	0	0	0	0	0	0	0	0	0	0	-0.00913962	0.775411	0	-1.53768	0.00913962	0.744187	0	0	0	0	0	0	0	0	0	0	0	0	0	0	0	0	0	0	0	0	0	0	0	0	0	0	0	0
	Gov Eq 1 (9)	0	0	0	0	0	0	0	0	0	0	0	0	0	0	0	0	0.018154	0.00901442	-0.036043	0.000250401	0.0179036	-0.00901442	0	0	0	0	0	0	0	0	0	0	0	0	0	0	0	0	0	0	0	0	0	0	0	0	0	0
	Gov Eq 2 (9)	0	0	0	0	0	0	0	0	0	0	0	0	0	0	0	0	-0.00901442	0.744188	0	-1.47584	0.00901442	0.713813	0	0	0	0	0	0	0	0	0	0	0	0	0	0	0	0	0	0	0	0	0	0	0	0	0	0
	Gov Eq 1 (10)	0	0	0	0	0	0	0	0	0	0	0	0	0	0	0	0	0	0	0.0179036	0.00888922	-0.0355424	0.000250401	0.0176532	-0.00888922	0	0	0	0	0	0	0	0	0	0	0	0	0	0	0	0	0	0	0	0	0	0	0	0
	Gov Eq 2 (10)	0	0	0	0	0	0	0	0	0	0	0	0	0	0	0	0	0	0	-0.00888922	0.713813	0	-1.41569	0.00888922	0.684276	0	0	0	0	0	0	0	0	0	0	0	0	0	0	0	0	0	0	0	0	0	0	0	0
	Gov Eq 1 (11)	0	0	0	0	0	0	0	0	0	0	0	0	0	0	0	0	0	0	0	0	0.0176532	0.00876402	-0.0350418	0.000250401	0.0174028	-0.00876402	0	0	0	0	0	0	0	0	0	0	0	0	0	0	0	0	0	0	0	0	0	0
	Gov Eq 2 (11)	0	0	0	0	0	0	0	0	0	0	0	0	0	0	0	0	0	0	0	0	-0.00876402	0.684277	0	-1.3572	0.00876402	0.655566	0	0	0	0	0	0	0	0	0	0	0	0	0	0	0	0	0	0	0	0	0	0
	Gov Eq 1 (12)	0	0	0	0	0	0	0	0	0	0	0	0	0	0	0	0	0	0	0	0	0	0	0.0174028	0.00863882	-0.0345412	0.000250401	0.0171524	-0.00863882	0	0	0	0	0	0	0	0	0	0	0	0	0	0	0	0	0	0	0	0
	Gov Eq 2 (12)	0	0	0	0	0	0	0	0	0	0	0	0	0	0	0	0	0	0	0	0	0	0	-0.00863882	0.655567	0	-1.30035	0.00863882	0.627671	0	0	0	0	0	0	0	0	0	0	0	0	0	0	0	0	0	0	0	0
	Gov Eq 1 (13)	0	0	0	0	0	0	0	0	0	0	0	0	0	0	0	0	0	0	0	0	0	0	0	0	0.0171524	0.00851362	-0.0340406	0.000250401	0.016902	-0.00851362	0	0	0	0	0	0	0	0	0	0	0	0	0	0	0	0	0	0
	Gov Eq 2 (13)	0	0	0	0	0	0	0	0	0	0	0	0	0	0	0	0	0	0	0	0	0	0	0	0	-0.00851362	0.627672	0	-1.24512	0.00851362	0.600578	0	0	0	0	0	0	0	0	0	0	0	0	0	0	0	0	0	0
	Gov Eq 1 (14)	0	0	0	0	0	0	0	0	0	0	0	0	0	0	0	0	0	0	0	0	0	0	0	0	0	0	0.016902	0.00838842	-0.03354	0.000250401	0.0166516	-0.00838842	0	0	0	0	0	0	0	0	0	0	0	0	0	0	0	0
	Gov Eq 2 (14)	0	0	0	0	0	0	0	0	0	0	0	0	0	0	0	0	0	0	0	0	0	0	0	0	0	0	-0.00838842	0.600579	0	-1.19148	0.00838842	0.574276	0	0	0	0	0	0	0	0	0	0	0	0	0	0	0	0
	Gov Eq 1 (15)	0	0	0	0	0	0	0	0	0	0	0	0	0	0	0	0	0	0	0	0	0	0	0	0	0	0	0	0	0.0166516	0.00826322	-0.0330394	0.000250401	0.0164012	-0.00826322	0	0	0	0	0	0	0	0	0	0	0	0	0	0
	Gov Eq 2 (15)	0	0	0	0	0	0	0	0	0	0	0	0	0	0	0	0	0	0	0	0	0	0	0	0	0	0	0	0	-0.00826322	0.574277	0	-1.13941	0.00826322	0.548754	0	0	0	0	0	0	0	0	0	0	0	0	0	0
	Gov Eq 1 (16)	0	0	0	0	0	0	0	0	0	0	0	0	0	0	0	0	0	0	0	0	0	0	0	0	0	0	0	0	0	0	0.0164012	0.00813802	-0.0325388	0.000250401	0.0161508	-0.00813802	0	0	0	0	0	0	0	0	0	0	0	0
	Gov Eq 2 (16)	0	0	0	0	0	0	0	0	0	0	0	0	0	0	0	0	0	0	0	0	0	0	0	0	0	0	0	0	0	0	-0.00813802	0.548755	0	-1.08889	0.00813802	0.523999	0	0	0	0	0	0	0	0	0	0	0	0
	Gov Eq 1 (17)	0	0	0	0	0	0	0	0	0	0	0	0	0	0	0	0	0	0	0	0	0	0	0	0	0	0	0	0	0	0	0	0	0.0161508	0.00801282	-0.0320382	0.000250401	0.0159004	-0.00801282	0	0	0	0	0	0	0	0	0	0
	Gov Eq 2 (17)	0	0	0	0	0	0	0	0	0	0	0	0	0	0	0	0	0	0	0	0	0	0	0	0	0	0	0	0	0	0	0	0	-0.00801282	0.524	0	-1.03989	0.00801282	0.5	0	0	0	0	0	0	0	0	0	0
	Gov Eq 1 (18)	0	0	0	0	0	0	0	0	0	0	0	0	0	0	0	0	0	0	0	0	0	0	0	0	0	0	0	0	0	0	0	0	0	0	0.0159004	0.00788762	-0.0315376	0.000250401	0.01565	-0.00788762	0	0	0	0	0	0	0	0
	Gov Eq 2 (18)	0	0	0	0	0	0	0	0	0	0	0	0	0	0	0	0	0	0	0	0	0	0	0	0	0	0	0	0	0	0	0	0	0	0	-0.00788762	0.500001	0	-0.992394	0.00788762	0.476745	0	0	0	0	0	0	0	0
	Gov Eq 1 (19)	0	0	0	0	0	0	0	0	0	0	0	0	0	0	0	0	0	0	0	0	0	0	0	0	0	0	0	0	0	0	0	0	0	0	0	0	0.01565	0.00776242	-0.031037	0.000250401	0.0153996	-0.00776242	0	0	0	0	0	0
	Gov Eq 2 (19)	0	0	0	0	0	0	0	0	0	0	0	0	0	0	0	0	0	0	0	0	0	0	0	0	0	0	0	0	0	0	0	0	0	0	0	0	-0.00776242	0.476746	0	-0.946372	0.00776242	0.454223	0	0	0	0	0	0
	Gov Eq 1 (20)	0	0	0	0	0	0	0	0	0	0	0	0	0	0	0	0	0	0	0	0	0	0	0	0	0	0	0	0	0	0	0	0	0	0	0	0	0	0	0.0153996	0.00763722	-0.0305364	0.000250401	0.0151492	-0.00763722	0	0	0	0
	Gov Eq 2 (20)	0	0	0	0	0	0	0	0	0	0	0	0	0	0	0	0	0	0	0	0	0	0	0	0	0	0	0	0	0	0	0	0	0	0	0	0	0	0	-0.00763722	0.454224	0	-0.901803	0.00763722	0.432421	0	0	0	0
	Gov Eq 1 (21)	0	0	0	0	0	0	0	0	0	0	0	0	0	0	0	0	0	0	0	0	0	0	0	0	0	0	0	0	0	0	0	0	0	0	0	0	0	0	0	0	0.0151492	0.00751202	-0.0300358	0.000250401	0.0148988	-0.00751202	0	0
	Gov Eq 2 (21)	0	0	0	0	0	0	0	0	0	0	0	0	0	0	0	0	0	0	0	0	0	0	0	0	0	0	0	0	0	0	0	0	0	0	0	0	0	0	0	0	-0.00751202	0.432422	0	-0.858664	0.00751202	0.411328	0	0
	Gov Eq 1 (22)	0	0	0	0	0	0	0	0	0	0	0	0	0	0	0	0	0	0	0	0	0	0	0	0	0	0	0	0	0	0	0	0	0	0	0	0	0	0	0	0	0	0	0.0148988	0.00738682	-0.0295352	0.000250401	0.0146484	-0.00738682
	Gov Eq 2 (22)	0	0	0	0	0	0	0	0	0	0	0	0	0	0	0	0	0	0	0	0	0	0	0	0	0	0	0	0	0	0	0	0	0	0	0	0	0	0	0	0	0	0	-0.00738682	0.411329	0	-0.81693	0.00738682	0.390933
	Gov Eq 1 (23)	0	0	0	0	0	0	0	0	0	0	0	0	0	0	0	0	0	0	0	0	0	0	0	0	0	0	0	0	0	0	0	0	0	0	0	0	0	0	0	0	0	0	0	0	0.0146484	0.00726162	-0.0290346	0.000250401
	Gov Eq 2 (23)	0	0	0	0	0	0	0	0	0	0	0	0	0	0	0	0	0	0	0	0	0	0	0	0	0	0	0	0	0	0	0	0	0	0	0	0	0	0	0	0	0	0	0	0	-0.00726162	0.390934	0	-0.77658
	Gov Eq 1 (24)	0	0	0	0	0	0	0	0	0	0	0	0	0	0	0	0	0	0	0	0	0	0	0	0	0	0	0	0	0	0	0	0	0	0	0	0	0	0	0	0	0	0	0	0	0	0	0.014398	0.00713642
	Gov Eq 2 (24)	0	0	0	0	0	0	0	0	0	0	0	0	0	0	0	0	0	0	0	0	0	0	0	0	0	0	0	0	0	0	0	0	0	0	0	0	0	0	0	0	0	0	0	0	0	0	-0.00713642	0.371224
	Gov Eq 1 (25)	0	0	0	0	0	0	0	0	0	0	0	0	0	0	0	0	0	0	0	0	0	0	0	0	0	0	0	0	0	0	0	0	0	0	0	0	0	0	0	0	0	0	0	0	0	0	0	0
	Gov Eq 2 (25)	0	0	0	0	0	0	0	0	0	0	0	0	0	0	0	0	0	0	0	0	0	0	0	0	0	0	0	0	0	0	0	0	0	0	0	0	0	0	0	0	0	0	0	0	0	0	0	0
	Gov Eq 1 (26)	0	0	0	0	0	0	0	0	0	0	0	0	0	0	0	0	0	0	0	0	0	0	0	0	0	0	0	0	0	0	0	0	0	0	0	0	0	0	0	0	0	0	0	0	0	0	0	0
	Gov Eq 2 (26)	0	0	0	0	0	0	0	0	0	0	0	0	0	0	0	0	0	0	0	0	0	0	0	0	0	0	0	0	0	0	0	0	0	0	0	0	0	0	0	0	0	0	0	0	0	0	0	0
	Gov Eq 1 (27)	0	0	0	0	0	0	0	0	0	0	0	0	0	0	0	0	0	0	0	0	0	0	0	0	0	0	0	0	0	0	0	0	0	0	0	0	0	0	0	0	0	0	0	0	0	0	0	0
	Gov Eq 2 (27)	0	0	0	0	0	0	0	0	0	0	0	0	0	0	0	0	0	0	0	0	0	0	0	0	0	0	0	0	0	0	0	0	0	0	0	0	0	0	0	0	0	0	0	0	0	0	0	0
	Gov Eq 1 (28)	0	0	0	0	0	0	0	0	0	0	0	0	0	0	0	0	0	0	0	0	0	0	0	0	0	0	0	0	0	0	0	0	0	0	0	0	0	0	0	0	0	0	0	0	0	0	0	0
	Gov Eq 2 (28)	0	0	0	0	0	0	0	0	0	0	0	0	0	0	0	0	0	0	0	0	0	0	0	0	0	0	0	0	0	0	0	0	0	0	0	0	0	0	0	0	0	0	0	0	0	0	0	0
	Gov Eq 1 (29)	0	0	0	0	0	0	0	0	0	0	0	0	0	0	0	0	0	0	0	0	0	0	0	0	0	0	0	0	0	0	0	0	0	0	0	0	0	0	0	0	0	0	0	0	0	0	0	0
	Gov Eq 2 (29)	0	0	0	0	0	0	0	0	0	0	0	0	0	0	0	0	0	0	0	0	0	0	0	0	0	0	0	0	0	0	0	0	0	0	0	0	0	0	0	0	0	0	0	0	0	0	0	0
	Gov Eq 1 (30)	0	0	0	0	0	0	0	0	0	0	0	0	0	0	0	0	0	0	0	0	0	0	0	0	0	0	0	0	0	0	0	0	0	0	0	0	0	0	0	0	0	0	0	0	0	0	0	0
	Gov Eq 2 (30)	0	0	0	0	0	0	0	0	0	0	0	0	0	0	0	0	0	0	0	0	0	0	0	0	0	0	0	0	0	0	0	0	0	0	0	0	0	0	0	0	0	0	0	0	0	0	0	0
	Gov Eq 1 (31)	0	0	0	0	0	0	0	0	0	0	0	0	0	0	0	0	0	0	0	0	0	0	0	0	0	0	0	0	0	0	0	0	0	0	0	0	0	0	0	0	0	0	0	0	0	0	0	0
	Gov Eq 2 (31)	0	0	0	0	0	0	0	0	0	0	0	0	0	0	0	0	0	0	0	0	0	0	0	0	0	0	0	0	0	0	0	0	0	0	0	0	0	0	0	0	0	0	0	0	0	0	0	0
	Gov Eq 1 (32)	0	0	0	0	0	0	0	0	0	0	0	0	0	0	0	0	0	0	0	0	0	0	0	0	0	0	0	0	0	0	0	0	0	0	0	0	0	0	0	0	0	0	0	0	0	0	0	0
	Gov Eq 2 (32)	0	0	0	0	0	0	0	0	0	0	0	0	0	0	0	0	0	0	0	0	0	0	0	0	0	0	0	0	0	0	0	0	0	0	0	0	0	0	0	0	0	0	0	0	0	0	0	0
	Gov Eq 1 (33)	0	0	0	0	0	0	0	0	0	0	0	0	0	0	0	0	0	0	0	0	0	0	0	0	0	0	0	0	0	0	0	0	0	0	0	0	0	0	0	0	0	0	0	0	0	0	0	0
	Gov Eq 2 (33)	0	0	0	0	0	0	0	0	0	0	0	0	0	0	0	0	0	0	0	0	0	0	0	0	0	0	0	0	0	0	0	0	0	0	0	0	0	0	0	0	0	0	0	0	0	0	0	0
	Gov Eq 1 (34)	0	0	0	0	0	0	0	0	0	0	0	0	0	0	0	0	0	0	0	0	0	0	0	0	0	0	0	0	0	0	0	0	0	0	0	0	0	0	0	0	0	0	0	0	0	0	0	0
	Gov Eq 2 (34)	0	0	0	0	0	0	0	0	0	0	0	0	0	0	0	0	0	0	0	0	0	0	0	0	0	0	0	0	0	0	0	0	0	0	0	0	0	0	0	0	0	0	0	0	0	0	0	0
	Gov Eq 1 (35)	0	0	0	0	0	0	0	0	0	0	0	0	0	0	0	0	0	0	0	0	0	0	0	0	0	0	0	0	0	0	0	0	0	0	0	0	0	0	0	0	0	0	0	0	0	0	0	0
	Gov Eq 2 (35)	0	0	0	0	0	0	0	0	0	0	0	0	0	0	0	0	0	0	0	0	0	0	0	0	0	0	0	0	0	0	0	0	0	0	0	0	0	0	0	0	0	0	0	0	0	0	0	0
	Gov Eq 1 (36)	0	0	0	0	0	0	0	0	0	0	0	0	0	0	0	0	0	0	0	0	0	0	0	0	0	0	0	0	0	0	0	0	0	0	0	0	0	0	0	0	0	0	0	0	0	0	0	0
	Gov Eq 2 (36)	0	0	0	0	0	0	0	0	0	0	0	0	0	0	0	0	0	0	0	0	0	0	0	0	0	0	0	0	0	0	0	0	0	0	0	0	0	0	0	0	0	0	0	0	0	0	0	0
	Gov Eq 1 (37)	0	0	0	0	0	0	0	0	0	0	0	0	0	0	0	0	0	0	0	0	0	0	0	0	0	0	0	0	0	0	0	0	0	0	0	0	0	0	0	0	0	0	0	0	0	0	0	0
	Gov Eq 2 (37)	0	0	0	0	0	0	0	0	0	0	0	0	0	0	0	0	0	0	0	0	0	0	0	0	0	0	0	0	0	0	0	0	0	0	0	0	0	0	0	0	0	0	0	0	0	0	0	0
	Gov Eq 1 (38)	0	0	0	0	0	0	0	0	0	0	0	0	0	0	0	0	0	0	0	0	0	0	0	0	0	0	0	0	0	0	0	0	0	0	0	0	0	0	0	0	0	0	0	0	0	0	0	0
	Gov Eq 2 (38)	0	0	0	0	0	0	0	0	0	0	0	0	0	0	0	0	0	0	0	0	0	0	0	0	0	0	0	0	0	0	0	0	0	0	0	0	0	0	0	0	0	0	0	0	0	0	0	0
	Gov Eq 1 (39)	0	0	0	0	0	0	0	0	0	0	0	0	0	0	0	0	0	0	0	0	0	0	0	0	0	0	0	0	0	0	0	0	0	0	0	0	0	0	0	0	0	0	0	0	0	0	0	0
	Gov Eq 2 (39)	0	0	0	0	0	0	0	0	0	0	0	0	0	0	0	0	0	0	0	0	0	0	0	0	0	0	0	0	0	0	0	0	0	0	0	0	0	0	0	0	0	0	0	0	0	0	0	0
	Gov Eq 1 (40)	0	0	0	0	0	0	0	0	0	0	0	0	0	0	0	0	0	0	0	0	0	0	0	0	0	0	0	0	0	0	0	0	0	0	0	0	0	0	0	0	0	0	0	0	0	0	0	0
	Gov Eq 2 (40)	0	0	0	0	0	0	0	0	0	0	0	0	0	0	0	0	0	0	0	0	0	0	0	0	0	0	0	0	0	0	0	0	0	0	0	0	0	0	0	0	0	0	0	0	0	0	0	0
	Gov Eq 1 (41)	0	0	0	0	0	0	0	0	0	0	0	0	0	0	0	0	0	0	0	0	0	0	0	0	0	0	0	0	0	0	0	0	0	0	0	0	0	0	0	0	0	0	0	0	0	0	0	0
	Gov Eq 2 (41)	0	0	0	0	0	0	0	0	0	0	0	0	0	0	0	0	0	0	0	0	0	0	0	0	0	0	0	0	0	0	0	0	0	0	0	0	0	0	0	0	0	0	0	0	0	0	0	0
	Bo Co 1 (1)	0	0	1	0	0	0	0	0	0	0	0	0	0	0	0	0	0	0	0	0	0	0	0	0	0	0	0	0	0	0	0	0	0	0	0	0	0	0	0	0	0	0	0	0	0	0	0	0
	Bo Co 2 (1)	0	1	0	0	0	-1	0	0	0	0	0	0	0	0	0	0	0	0	0	0	0	0	0	0	0	0	0	0	0	0	0	0	0	0	0	0	0	0	0	0	0	0	0	0	0	0	0	0
	Bo Co 1 (41)	0	0	0	0	0	0	0	0	0	0	0	0	0	0	0	0	0	0	0	0	0	0	0	0	0	0	0	0	0	0	0	0	0	0	0	0	0	0	0	0	0	0	0	0	0	0	0	0
	Bo Co 2 (41)	0	0	0	0	0	0	0	0	0	0	0	0	0	0	0	0	0	0	0	0	0	0	0	0	0	0	0	0	0	0	0	0	0	0	0	0	0	0	0	0	0	0	0	0	0	0	0	0
[truncated: 38 more columns]

## Sheet: Fixed-fixed beam
		Vibration analysis of a tapered fixed-fixed Timoshenko beam
	W-F FDM approximation
		Nine-point grid
	n =	8
		0.125
					Poisson ratio:	0.3
		0.0312			Shear correction factor:	0.833333
	kRIr =	0.01
		0.500801
		12.8356				Determinant =	1.90989e-08
					PSM	ABAQUS	9 pt
		0.0402229		2.57427	11.9235	11.9500	12.8356
		0.5
			Nodes	1		2		3		4		5		6		7		8		9
				0		0.125		0.25		0.375		0.5		0.625		0.75		0.875		1
				1		0.823975		0.669922		0.536377		0.421875		0.324951		0.244141		0.177979		0.125
				-0.1875		-0.164795		-0.143555		-0.123779		-0.105469		-0.088623		-0.0732422		-0.0593262		-0.046875
				1		0.9375		0.875		0.8125		0.75		0.6875		0.625		0.5625		0.5
				-0.0625		-0.0625		-0.0625		-0.0625		-0.0625		-0.0625		-0.0625		-0.0625		-0.0625
		W0	hkF0	W1	hkF1	W2	hkF2	W3	hkF3	W4	hkF4	W5	hkF5	W6	hkF6	W7	hkF7	W8	hkF8	W9	hkF9	W10	hkF10
	Gov Eq 1 (1)	0.516451	0.250401	-0.96138	0.0313001	0.485151	-0.250401	0	0	0	0	0	0	0	0	0	0	0	0	0	0	0	0
	Gov Eq 2 (1)	-0.250401	1.09375	0	-2.47506	0.250401	0.90625	0	0	0	0	0	0	0	0	0	0	0	0	0	0	0	0
	Gov Eq 1 (2)	0	0	0.485151	0.234751	-0.901293	0.0313001	0.453851	-0.234751	0	0	0	0	0	0	0	0	0	0	0	0	0	0
	Gov Eq 2 (2)	0	0	-0.234751	0.906372	0	-2.09624	0.234751	0.741577	0	0	0	0	0	0	0	0	0	0	0	0	0	0
	Gov Eq 1 (3)	0	0	0	0	0.453851	0.219101	-0.841207	0.0313001	0.422551	-0.219101	0	0	0	0	0	0	0	0	0	0	0	0
	Gov Eq 2 (3)	0	0	0	0	-0.219101	0.741699	0	-1.7608	0.219101	0.598145	0	0	0	0	0	0	0	0	0	0	0	0
	Gov Eq 1 (4)	0	0	0	0	0	0	0.422551	0.203451	-0.781121	0.0313001	0.391251	-0.203451	0	0	0	0	0	0	0	0	0	0
	Gov Eq 2 (4)	0	0	0	0	0	0	-0.203451	0.598267	0	-1.46585	0.203451	0.474487	0	0	0	0	0	0	0	0	0	0
	Gov Eq 1 (5)	0	0	0	0	0	0	0	0	0.391251	0.1878	-0.721035	0.0313001	0.359951	-0.1878	0	0	0	0	0	0	0	0
	Gov Eq 2 (5)	0	0	0	0	0	0	0	0	-0.1878	0.474609	0	-1.20849	0.1878	0.369141	0	0	0	0	0	0	0	0
	Gov Eq 1 (6)	0	0	0	0	0	0	0	0	0	0	0.359951	0.17215	-0.660949	0.0313001	0.328651	-0.17215	0	0	0	0	0	0
	Gov Eq 2 (6)	0	0	0	0	0	0	0	0	0	0	-0.17215	0.369263	0	-0.985838	0.17215	0.28064	0	0	0	0	0	0
	Gov Eq 1 (7)	0	0	0	0	0	0	0	0	0	0	0	0	0.328651	0.1565	-0.600862	0.0313001	0.297351	-0.1565	0	0	0	0
	Gov Eq 2 (7)	0	0	0	0	0	0	0	0	0	0	0	0	-0.1565	0.280762	0	-0.794997	0.1565	0.20752	0	0	0	0
	Gov Eq 1 (8)	0	0	0	0	0	0	0	0	0	0	0	0	0	0	0.297351	0.14085	-0.540776	0.0313001	0.266051	-0.14085	0	0
	Gov Eq 2 (8)	0	0	0	0	0	0	0	0	0	0	0	0	0	0	-0.14085	0.207642	0	-0.633076	0.14085	0.148315	0	0
	Gov Eq 1 (9)	0	0	0	0	0	0	0	0	0	0	0	0	0	0	0	0	0.266051	0.1252	-0.48069	0.0313001	0.234751	-0.1252
	Gov Eq 2 (9)	0	0	0	0	0	0	0	0	0	0	0	0	0	0	0	0	-0.1252	0.148438	0	-0.497183	0.1252	0.101562
	Bo Co 1 (1)	0	0	1	0	0	0	0	0	0	0	0	0	0	0	0	0	0	0	0	0	0	0
	Bo Co 2 (1)	0	0	0	1	0	0	0	0	0	0	0	0	0	0	0	0	0	0	0	0	0	0
	Bo Co 1 (9)	0	0	0	0	0	0	0	0	0	0	0	0	0	0	0	0	0	0	1	0	0	0
	Bo Co 2 (9)	0	0	0	0	0	0	0	0	0	0	0	0	0	0	0	0	0	0	0	1	0	0
	W-F FDM approximation
		17-point grid
	n =	16
		0.0625
		0.0312
	kRIr =	0.01
		0.1252
		12.1781				Determinant =	-1.61411e-06
					PSM	ABAQUS	9 pt	17 pt
		0.00226298		0.579322	11.9235	11.9500	12.8356	12.1781
		0.5
			Nodes	1		2		3		4		5		6		7		8		9		10		11		12		13		14		15		16		17
				0		0.0625		0.125		0.1875		0.25		0.3125		0.375		0.4375		0.5		0.5625		0.625		0.6875		0.75		0.8125		0.875		0.9375		1
				1		0.909149		0.823975		0.744293		0.669922		0.600677		0.536377		0.476837		0.421875		0.371307		0.324951		0.282623		0.244141		0.20932		0.177979		0.149933		0.125
				-0.09375		-0.0879822		-0.0823975		-0.0769958		-0.0717773		-0.0667419		-0.0618896		-0.0572205		-0.0527344		-0.0484314		-0.0443115		-0.0403748		-0.0366211		-0.0330505		-0.0296631		-0.0264587		-0.0234375
				1		0.96875		0.9375		0.90625		0.875		0.84375		0.8125		0.78125		0.75		0.71875		0.6875		0.65625		0.625		0.59375		0.5625		0.53125		0.5
				-0.03125		-0.03125		-0.03125		-0.03125		-0.03125		-0.03125		-0.03125		-0.03125		-0.03125		-0.03125		-0.03125		-0.03125		-0.03125		-0.03125		-0.03125		-0.03125		-0.03125
		W0	hkF0	W1	hkF1	W2	hkF2	W3	hkF3	W4	hkF4	W5	hkF5	W6	hkF6	W7	hkF7	W8	hkF8	W9	hkF9	W10	hkF10	W11	hkF11	W12	hkF12	W13	hkF13	W14	hkF14	W15	hkF15	W16	hkF16	W17	hkF17	W18	hkF18
	Gov Eq 1 (1)	0.127157	0.0626002	-0.248138	0.00391251	0.123244	-0.0626002	0	0	0	0	0	0	0	0	0	0	0	0	0	0	0	0	0	0	0	0	0	0	0	0	0	0	0	0	0	0	0	0
	Gov Eq 2 (1)	-0.0626002	1.04688	0	-2.11941	0.0626002	0.953125	0	0	0	0	0	0	0	0	0	0	0	0	0	0	0	0	0	0	0	0	0	0	0	0	0	0	0	0	0	0	0	0
	Gov Eq 1 (2)	0	0	0.123244	0.0606439	-0.240383	0.00391251	0.119332	-0.0606439	0	0	0	0	0	0	0	0	0	0	0	0	0	0	0	0	0	0	0	0	0	0	0	0	0	0	0	0	0	0
	Gov Eq 2 (2)	0	0	-0.0606439	0.95314	0	-1.93432	0.0606439	0.865158	0	0	0	0	0	0	0	0	0	0	0	0	0	0	0	0	0	0	0	0	0	0	0	0	0	0	0	0	0	0
	Gov Eq 1 (3)	0	0	0	0	0.119332	0.0586877	-0.232629	0.00391251	0.115419	-0.0586877	0	0	0	0	0	0	0	0	0	0	0	0	0	0	0	0	0	0	0	0	0	0	0	0	0	0	0	0
	Gov Eq 2 (3)	0	0	0	0	-0.0586877	0.865173	0	-1.76055	0.0586877	0.782776	0	0	0	0	0	0	0	0	0	0	0	0	0	0	0	0	0	0	0	0	0	0	0	0	0	0	0	0
	Gov Eq 1 (4)	0	0	0	0	0	0	0.115419	0.0567314	-0.224875	0.00391251	0.111507	-0.0567314	0	0	0	0	0	0	0	0	0	0	0	0	0	0	0	0	0	0	0	0	0	0	0	0	0	0
	Gov Eq 2 (4)	0	0	0	0	0	0	-0.0567314	0.782791	0	-1.59774	0.0567314	0.705795	0	0	0	0	0	0	0	0	0	0	0	0	0	0	0	0	0	0	0	0	0	0	0	0	0	0
	Gov Eq 1 (5)	0	0	0	0	0	0	0	0	0.111507	0.0547751	-0.21712	0.00391251	0.107594	-0.0547751	0	0	0	0	0	0	0	0	0	0	0	0	0	0	0	0	0	0	0	0	0	0	0	0
	Gov Eq 2 (5)	0	0	0	0	0	0	0	0	-0.0547751	0.705811	0	-1.44551	0.0547751	0.634033	0	0	0	0	0	0	0	0	0	0	0	0	0	0	0	0	0	0	0	0	0	0	0	0
	Gov Eq 1 (6)	0	0	0	0	0	0	0	0	0	0	0.107594	0.0528189	-0.209366	0.00391251	0.103682	-0.0528189	0	0	0	0	0	0	0	0	0	0	0	0	0	0	0	0	0	0	0	0	0	0
	Gov Eq 2 (6)	0	0	0	0	0	0	0	0	0	0	-0.0528189	0.634048	0	-1.30351	0.0528189	0.567307	0	0	0	0	0	0	0	0	0	0	0	0	0	0	0	0	0	0	0	0	0	0
	Gov Eq 1 (7)	0	0	0	0	0	0	0	0	0	0	0	0	0.103682	0.0508626	-0.201612	0.00391251	0.099769	-0.0508626	0	0	0	0	0	0	0	0	0	0	0	0	0	0	0	0	0	0	0	0
	Gov Eq 2 (7)	0	0	0	0	0	0	0	0	0	0	0	0	-0.0508626	0.567322	0	-1.17137	0.0508626	0.505432	0	0	0	0	0	0	0	0	0	0	0	0	0	0	0	0	0	0	0	0
	Gov Eq 1 (8)	0	0	0	0	0	0	0	0	0	0	0	0	0	0	0.099769	0.0489064	-0.193858	0.00391251	0.0958565	-0.0489064	0	0	0	0	0	0	0	0	0	0	0	0	0	0	0	0	0	0
	Gov Eq 2 (8)	0	0	0	0	0	0	0	0	0	0	0	0	0	0	-0.0489064	0.505447	0	-1.04872	0.0489064	0.448227	0	0	0	0	0	0	0	0	0	0	0	0	0	0	0	0	0	0
	Gov Eq 1 (9)	0	0	0	0	0	0	0	0	0	0	0	0	0	0	0	0	0.0958565	0.0469501	-0.186103	0.00391251	0.091944	-0.0469501	0	0	0	0	0	0	0	0	0	0	0	0	0	0	0	0
	Gov Eq 2 (9)	0	0	0	0	0	0	0	0	0	0	0	0	0	0	0	0	-0.0469501	0.448242	0	-0.935206	0.0469501	0.395508	0	0	0	0	0	0	0	0	0	0	0	0	0	0	0	0
	Gov Eq 1 (10)	0	0	0	0	0	0	0	0	0	0	0	0	0	0	0	0	0	0	0.091944	0.0449939	-0.178349	0.00391251	0.0880315	-0.0449939	0	0	0	0	0	0	0	0	0	0	0	0	0	0
	Gov Eq 2 (10)	0	0	0	0	0	0	0	0	0	0	0	0	0	0	0	0	0	0	-0.0449939	0.395523	0	-0.830451	0.0449939	0.347092	0	0	0	0	0	0	0	0	0	0	0	0	0	0
	Gov Eq 1 (11)	0	0	0	0	0	0	0	0	0	0	0	0	0	0	0	0	0	0	0	0	0.0880315	0.0430376	-0.170595	0.00391251	0.084119	-0.0430376	0	0	0	0	0	0	0	0	0	0	0	0
	Gov Eq 2 (11)	0	0	0	0	0	0	0	0	0	0	0	0	0	0	0	0	0	0	0	0	-0.0430376	0.347107	0	-0.734095	0.0430376	0.302795	0	0	0	0	0	0	0	0	0	0	0	0
	Gov Eq 1 (12)	0	0	0	0	0	0	0	0	0	0	0	0	0	0	0	0	0	0	0	0	0	0	0.084119	0.0410814	-0.16284	0.00391251	0.0802065	-0.0410814	0	0	0	0	0	0	0	0	0	0
	Gov Eq 2 (12)	0	0	0	0	0	0	0	0	0	0	0	0	0	0	0	0	0	0	0	0	0	0	-0.0410814	0.302811	0	-0.645772	0.0410814	0.262436	0	0	0	0	0	0	0	0	0	0
	Gov Eq 1 (13)	0	0	0	0	0	0	0	0	0	0	0	0	0	0	0	0	0	0	0	0	0	0	0	0	0.0802065	0.0391251	-0.155086	0.00391251	0.0762939	-0.0391251	0	0	0	0	0	0	0	0
	Gov Eq 2 (13)	0	0	0	0	0	0	0	0	0	0	0	0	0	0	0	0	0	0	0	0	0	0	0	0	-0.0391251	0.262451	0	-0.565117	0.0391251	0.22583	0	0	0	0	0	0	0	0
	Gov Eq 1 (14)	0	0	0	0	0	0	0	0	0	0	0	0	0	0	0	0	0	0	0	0	0	0	0	0	0	0	0.0762939	0.0371688	-0.147332	0.00391251	0.0723814	-0.0371688	0	0	0	0	0	0
	Gov Eq 2 (14)	0	0	0	0	0	0	0	0	0	0	0	0	0	0	0	0	0	0	0	0	0	0	0	0	0	0	-0.0371688	0.225845	0	-0.491765	0.0371688	0.192795	0	0	0	0	0	0
	Gov Eq 1 (15)	0	0	0	0	0	0	0	0	0	0	0	0	0	0	0	0	0	0	0	0	0	0	0	0	0	0	0	0	0.0723814	0.0352126	-0.139577	0.00391251	0.0684689	-0.0352126	0	0	0	0
	Gov Eq 2 (15)	0	0	0	0	0	0	0	0	0	0	0	0	0	0	0	0	0	0	0	0	0	0	0	0	0	0	0	0	-0.0352126	0.19281	0	-0.425351	0.0352126	0.163147	0	0	0	0
	Gov Eq 1 (16)	0	0	0	0	0	0	0	0	0	0	0	0	0	0	0	0	0	0	0	0	0	0	0	0	0	0	0	0	0	0	0.0684689	0.0332563	-0.131823	0.00391251	0.0645564	-0.0332563	0	0
	Gov Eq 2 (16)	0	0	0	0	0	0	0	0	0	0	0	0	0	0	0	0	0	0	0	0	0	0	0	0	0	0	0	0	0	0	-0.0332563	0.163162	0	-0.36551	0.0332563	0.136703	0	0
	Gov Eq 1 (17)	0	0	0	0	0	0	0	0	0	0	0	0	0	0	0	0	0	0	0	0	0	0	0	0	0	0	0	0	0	0	0	0	0.0645564	0.0313001	-0.124069	0.00391251	0.0606439	-0.0313001
	Gov Eq 2 (17)	0	0	0	0	0	0	0	0	0	0	0	0	0	0	0	0	0	0	0	0	0	0	0	0	0	0	0	0	0	0	0	0	-0.0313001	0.136719	0	-0.311876	0.0313001	0.113281
	Bo Co 1 (1)	0	0	1	0	0	0	0	0	0	0	0	0	0	0	0	0	0	0	0	0	0	0	0	0	0	0	0	0	0	0	0	0	0	0	0	0	0	0
	Bo Co 2 (1)	0	0	0	1	0	0	0	0	0	0	0	0	0	0	0	0	0	0	0	0	0	0	0	0	0	0	0	0	0	0	0	0	0	0	0	0	0	0
	Bo Co 1 (17)	0	0	0	0	0	0	0	0	0	0	0	0	0	0	0	0	0	0	0	0	0	0	0	0	0	0	0	0	0	0	0	0	0	0	1	0	0	0
	Bo Co 2 (17)	0	0	0	0	0	0	0	0	0	0	0	0	0	0	0	0	0	0	0	0	0	0	0	0	0	0	0	0	0	0	0	0	0	0	0	1	0	0
	W-F FDM approximation
		25-point grid
	n =	24
		0.0416667
		0.0312
	kRIr =	0.01
		0.0556446
		12.0392				Determinant =	2.71646e-06
					PSM	ABAQUS	9 pt	17 pt	25 pt
		0.000436871		0.251638	11.9235	11.9500	12.8356	12.1781	12.0392
		0.5
			Nodes	1		2		3		4		5		6		7		8		9		10		11		12		13		14		15		16		17		18		19		20		21		22		23
				0		0.0416667		0.0833333		0.125		0.166667		0.208333		0.25		0.291667		0.333333		0.375		0.416667		0.458333		0.5		0.541667		0.583333		0.625		0.666667		0.708333		0.75		0.791667		0.833333		0.875		0.916667
				1		0.938793		0.880136		0.823975		0.770255		0.718922		0.669922		0.623201		0.578704		0.536377		0.496166		0.458017		0.421875		0.387686		0.355396		0.324951		0.296296		0.269378		0.244141		0.220531		0.198495		0.177979		0.158927
				-0.0625		-0.059923		-0.0574002		-0.0549316		-0.0525174		-0.0501573		-0.0478516		-0.0456		-0.0434028		-0.0412598		-0.039171		-0.0371365		-0.0351562		-0.0332303		-0.0313585		-0.029541		-0.0277778		-0.0260688		-0.0244141		-0.0228136		-0.0212674		-0.0197754		-0.0183377
				1		0.979167		0.958333		0.9375		0.916667		0.895833		0.875		0.854167		0.833333		0.8125		0.791667		0.770833		0.75		0.729167		0.708333		0.6875		0.666667		0.645833		0.625		0.604167		0.583333		0.5625		0.541667
				-0.0208333		-0.0208333		-0.0208333		-0.0208333		-0.0208333		-0.0208333		-0.0208333		-0.0208333		-0.0208333		-0.0208333		-0.0208333		-0.0208333		-0.0208333		-0.0208333		-0.0208333		-0.0208333		-0.0208333		-0.0208333		-0.0208333		-0.0208333		-0.0208333		-0.0208333		-0.0208333
		W0	hkF0	W1	hkF1	W2	hkF2	W3	hkF3	W4	hkF4	W5	hkF5	W6	hkF6	W7	hkF7	W8	hkF8	W9	hkF9	W10	hkF10	W11	hkF11	W12	hkF12	W13	hkF13	W14	hkF14	W15	hkF15	W16	hkF16	W17	hkF17	W18	hkF18	W19	hkF19	W20	hkF20	W21	hkF21	W22	hkF22	W23	hkF23
	Gov Eq 1 (1)	0.0562242	0.0278223	-0.110852	0.00115926	0.055065	-0.0278223	0	0	0	0	0	0	0	0	0	0	0	0	0	0	0	0	0	0	0	0	0	0	0	0	0	0	0	0	0	0	0	0	0	0	0	0	0	0	0	0	0	0
	Gov Eq 2 (1)	-0.0278223	1.03125	0	-2.05313	0.0278223	0.96875	0	0	0	0	0	0	0	0	0	0	0	0	0	0	0	0	0	0	0	0	0	0	0	0	0	0	0	0	0	0	0	0	0	0	0	0	0	0	0	0	0	0
	Gov Eq 1 (2)	0	0	0.055065	0.0272427	-0.108543	0.00115926	0.0539057	-0.0272427	0	0	0	0	0	0	0	0	0	0	0	0	0	0	0	0	0	0	0	0	0	0	0	0	0	0	0	0	0	0	0	0	0	0	0	0	0	0	0	0
	Gov Eq 2 (2)	0	0	-0.0272427	0.968755	0	-1.92971	0.0272427	0.908832	0	0	0	0	0	0	0	0	0	0	0	0	0	0	0	0	0	0	0	0	0	0	0	0	0	0	0	0	0	0	0	0	0	0	0	0	0	0	0	0
	Gov Eq 1 (3)	0	0	0	0	0.0539057	0.026663	-0.106233	0.00115926	0.0527464	-0.026663	0	0	0	0	0	0	0	0	0	0	0	0	0	0	0	0	0	0	0	0	0	0	0	0	0	0	0	0	0	0	0	0	0	0	0	0	0	0
	Gov Eq 2 (3)	0	0	0	0	-0.026663	0.908836	0	-1.81138	0.026663	0.851436	0	0	0	0	0	0	0	0	0	0	0	0	0	0	0	0	0	0	0	0	0	0	0	0	0	0	0	0	0	0	0	0	0	0	0	0	0	0
	Gov Eq 1 (4)	0	0	0	0	0	0	0.0527464	0.0260834	-0.103924	0.00115926	0.0515872	-0.0260834	0	0	0	0	0	0	0	0	0	0	0	0	0	0	0	0	0	0	0	0	0	0	0	0	0	0	0	0	0	0	0	0	0	0	0	0
	Gov Eq 2 (4)	0	0	0	0	0	0	-0.0260834	0.85144	0	-1.69804	0.0260834	0.796509	0	0	0	0	0	0	0	0	0	0	0	0	0	0	0	0	0	0	0	0	0	0	0	0	0	0	0	0	0	0	0	0	0	0	0	0
	Gov Eq 1 (5)	0	0	0	0	0	0	0	0	0.0515872	0.0255038	-0.101615	0.00115926	0.0504279	-0.0255038	0	0	0	0	0	0	0	0	0	0	0	0	0	0	0	0	0	0	0	0	0	0	0	0	0	0	0	0	0	0	0	0	0	0
	Gov Eq 2 (5)	0	0	0	0	0	0	0	0	-0.0255038	0.796513	0	-1.58958	0.0255038	0.743996	0	0	0	0	0	0	0	0	0	0	0	0	0	0	0	0	0	0	0	0	0	0	0	0	0	0	0	0	0	0	0	0	0	0
	Gov Eq 1 (6)	0	0	0	0	0	0	0	0	0	0	0.0504279	0.0249241	-0.0993052	0.00115926	0.0492686	-0.0249241	0	0	0	0	0	0	0	0	0	0	0	0	0	0	0	0	0	0	0	0	0	0	0	0	0	0	0	0	0	0	0	0
	Gov Eq 2 (6)	0	0	0	0	0	0	0	0	0	0	-0.0249241	0.744	0	-1.48588	0.0249241	0.693843	0	0	0	0	0	0	0	0	0	0	0	0	0	0	0	0	0	0	0	0	0	0	0	0	0	0	0	0	0	0	0	0
	Gov Eq 1 (7)	0	0	0	0	0	0	0	0	0	0	0	0	0.0492686	0.0243445	-0.0969958	0.00115926	0.0481094	-0.0243445	0	0	0	0	0	0	0	0	0	0	0	0	0	0	0	0	0	0	0	0	0	0	0	0	0	0	0	0	0	0
	Gov Eq 2 (7)	0	0	0	0	0	0	0	0	0	0	0	0	-0.0243445	0.693848	0	-1.38685	0.0243445	0.645996	0	0	0	0	0	0	0	0	0	0	0	0	0	0	0	0	0	0	0	0	0	0	0	0	0	0	0	0	0	0
	Gov Eq 1 (8)	0	0	0	0	0	0	0	0	0	0	0	0	0	0	0.0481094	0.0237649	-0.0946863	0.00115926	0.0469501	-0.0237649	0	0	0	0	0	0	0	0	0	0	0	0	0	0	0	0	0	0	0	0	0	0	0	0	0	0	0	0
	Gov Eq 2 (8)	0	0	0	0	0	0	0	0	0	0	0	0	0	0	-0.0237649	0.646001	0	-1.29236	0.0237649	0.600401	0	0	0	0	0	0	0	0	0	0	0	0	0	0	0	0	0	0	0	0	0	0	0	0	0	0	0	0
	Gov Eq 1 (9)	0	0	0	0	0	0	0	0	0	0	0	0	0	0	0	0	0.0469501	0.0231852	-0.0923769	0.00115926	0.0457909	-0.0231852	0	0	0	0	0	0	0	0	0	0	0	0	0	0	0	0	0	0	0	0	0	0	0	0	0	0
	Gov Eq 2 (9)	0	0	0	0	0	0	0	0	0	0	0	0	0	0	0	0	-0.0231852	0.600405	0	-1.20232	0.0231852	0.557002	0	0	0	0	0	0	0	0	0	0	0	0	0	0	0	0	0	0	0	0	0	0	0	0	0	0
	Gov Eq 1 (10)	0	0	0	0	0	0	0	0	0	0	0	0	0	0	0	0	0	0	0.0457909	0.0226056	-0.0900675	0.00115926	0.0446316	-0.0226056	0	0	0	0	0	0	0	0	0	0	0	0	0	0	0	0	0	0	0	0	0	0	0	0
	Gov Eq 2 (10)	0	0	0	0	0	0	0	0	0	0	0	0	0	0	0	0	0	0	-0.0226056	0.557007	0	-1.11662	0.0226056	0.515747	0	0	0	0	0	0	0	0	0	0	0	0	0	0	0	0	0	0	0	0	0	0	0	0
	Gov Eq 1 (11)	0	0	0	0	0	0	0	0	0	0	0	0	0	0	0	0	0	0	0	0	0.0446316	0.022026	-0.0877581	0.00115926	0.0434723	-0.022026	0	0	0	0	0	0	0	0	0	0	0	0	0	0	0	0	0	0	0	0	0	0
	Gov Eq 2 (11)	0	0	0	0	0	0	0	0	0	0	0	0	0	0	0	0	0	0	0	0	-0.022026	0.515752	0	-1.03514	0.022026	0.476581	0	0	0	0	0	0	0	0	0	0	0	0	0	0	0	0	0	0	0	0	0	0
	Gov Eq 1 (12)	0	0	0	0	0	0	0	0	0	0	0	0	0	0	0	0	0	0	0	0	0	0	0.0434723	0.0214464	-0.0854486	0.00115926	0.0423131	-0.0214464	0	0	0	0	0	0	0	0	0	0	0	0	0	0	0	0	0	0	0	0
	Gov Eq 2 (12)	0	0	0	0	0	0	0	0	0	0	0	0	0	0	0	0	0	0	0	0	0	0	-0.0214464	0.476585	0	-0.957774	0.0214464	0.439449	0	0	0	0	0	0	0	0	0	0	0	0	0	0	0	0	0	0	0	0
	Gov Eq 1 (13)	0	0	0	0	0	0	0	0	0	0	0	0	0	0	0	0	0	0	0	0	0	0	0	0	0.0423131	0.0208667	-0.0831392	0.00115926	0.0411538	-0.0208667	0	0	0	0	0	0	0	0	0	0	0	0	0	0	0	0	0	0
	Gov Eq 2 (13)	0	0	0	0	0	0	0	0	0	0	0	0	0	0	0	0	0	0	0	0	0	0	0	0	-0.0208667	0.439453	0	-0.884422	0.0208667	0.404297	0	0	0	0	0	0	0	0	0	0	0	0	0	0	0	0	0	0
	Gov Eq 1 (14)	0	0	0	0	0	0	0	0	0	0	0	0	0	0	0	0	0	0	0	0	0	0	0	0	0	0	0.0411538	0.0202871	-0.0808298	0.00115926	0.0399945	-0.0202871	0	0	0	0	0	0	0	0	0	0	0	0	0	0	0	0
	Gov Eq 2 (14)	0	0	0	0	0	0	0	0	0	0	0	0	0	0	0	0	0	0	0	0	0	0	0	0	0	0	-0.0202871	0.404301	0	-0.814971	0.0202871	0.371071	0	0	0	0	0	0	0	0	0	0	0	0	0	0	0	0
	Gov Eq 1 (15)	0	0	0	0	0	0	0	0	0	0	0	0	0	0	0	0	0	0	0	0	0	0	0	0	0	0	0	0	0.0399945	0.0197075	-0.0785204	0.00115926	0.0388353	-0.0197075	0	0	0	0	0	0	0	0	0	0	0	0	0	0
	Gov Eq 2 (15)	0	0	0	0	0	0	0	0	0	0	0	0	0	0	0	0	0	0	0	0	0	0	0	0	0	0	0	0	-0.0197075	0.371076	0	-0.749313	0.0197075	0.339717	0	0	0	0	0	0	0	0	0	0	0	0	0	0
	Gov Eq 1 (16)	0	0	0	0	0	0	0	0	0	0	0	0	0	0	0	0	0	0	0	0	0	0	0	0	0	0	0	0	0	0	0.0388353	0.0191278	-0.076211	0.00115926	0.037676	-0.0191278	0	0	0	0	0	0	0	0	0	0	0	0
	Gov Eq 2 (16)	0	0	0	0	0	0	0	0	0	0	0	0	0	0	0	0	0	0	0	0	0	0	0	0	0	0	0	0	0	0	-0.0191278	0.339722	0	-0.68734	0.0191278	0.310181	0	0	0	0	0	0	0	0	0	0	0	0
	Gov Eq 1 (17)	0	0	0	0	0	0	0	0	0	0	0	0	0	0	0	0	0	0	0	0	0	0	0	0	0	0	0	0	0	0	0	0	0.037676	0.0185482	-0.0739015	0.00115926	0.0365168	-0.0185482	0	0	0	0	0	0	0	0	0	0
	Gov Eq 2 (17)	0	0	0	0	0	0	0	0	0	0	0	0	0	0	0	0	0	0	0	0	0	0	0	0	0	0	0	0	0	0	0	0	-0.0185482	0.310185	0	-0.628943	0.0185482	0.282407	0	0	0	0	0	0	0	0	0	0
	Gov Eq 1 (18)	0	0	0	0	0	0	0	0	0	0	0	0	0	0	0	0	0	0	0	0	0	0	0	0	0	0	0	0	0	0	0	0	0	0	0.0365168	0.0179686	-0.0715921	0.00115926	0.0353575	-0.0179686	0	0	0	0	0	0	0	0
	Gov Eq 2 (18)	0	0	0	0	0	0	0	0	0	0	0	0	0	0	0	0	0	0	0	0	0	0	0	0	0	0	0	0	0	0	0	0	0	0	-0.0179686	0.282412	0	-0.574014	0.0179686	0.256343	0	0	0	0	0	0	0	0
	Gov Eq 1 (19)	0	0	0	0	0	0	0	0	0	0	0	0	0	0	0	0	0	0	0	0	0	0	0	0	0	0	0	0	0	0	0	0	0	0	0	0	0.0353575	0.0173889	-0.0692827	0.00115926	0.0341982	-0.0173889	0	0	0	0	0	0
	Gov Eq 2 (19)	0	0	0	0	0	0	0	0	0	0	0	0	0	0	0	0	0	0	0	0	0	0	0	0	0	0	0	0	0	0	0	0	0	0	0	0	-0.0173889	0.256348	0	-0.522445	0.0173889	0.231934	0	0	0	0	0	0
	Gov Eq 1 (20)	0	0	0	0	0	0	0	0	0	0	0	0	0	0	0	0	0	0	0	0	0	0	0	0	0	0	0	0	0	0	0	0	0	0	0	0	0	0	0.0341982	0.0168093	-0.0669733	0.00115926	0.033039	-0.0168093	0	0	0	0
	Gov Eq 2 (20)	0	0	0	0	0	0	0	0	0	0	0	0	0	0	0	0	0	0	0	0	0	0	0	0	0	0	0	0	0	0	0	0	0	0	0	0	0	0	-0.0168093	0.231938	0	-0.474126	0.0168093	0.209125	0	0	0	0
	Gov Eq 1 (21)	0	0	0	0	0	0	0	0	0	0	0	0	0	0	0	0	0	0	0	0	0	0	0	0	0	0	0	0	0	0	0	0	0	0	0	0	0	0	0	0	0.033039	0.0162297	-0.0646638	0.00115926	0.0318797	-0.0162297	0	0
	Gov Eq 2 (21)	0	0	0	0	0	0	0	0	0	0	0	0	0	0	0	0	0	0	0	0	0	0	0	0	0	0	0	0	0	0	0	0	0	0	0	0	0	0	0	0	-0.0162297	0.209129	0	-0.428951	0.0162297	0.187862	0	0
	Gov Eq 1 (22)	0	0	0	0	0	0	0	0	0	0	0	0	0	0	0	0	0	0	0	0	0	0	0	0	0	0	0	0	0	0	0	0	0	0	0	0	0	0	0	0	0	0	0.0318797	0.01565	-0.0623544	0.00115926	0.0307204	-0.01565
	Gov Eq 2 (22)	0	0	0	0	0	0	0	0	0	0	0	0	0	0	0	0	0	0	0	0	0	0	0	0	0	0	0	0	0	0	0	0	0	0	0	0	0	0	0	0	0	0	-0.01565	0.187866	0	-0.386809	0.01565	0.168091
	Gov Eq 1 (23)	0	0	0	0	0	0	0	0	0	0	0	0	0	0	0	0	0	0	0	0	0	0	0	0	0	0	0	0	0	0	0	0	0	0	0	0	0	0	0	0	0	0	0	0	0.0307204	0.0150704	-0.060045	0.00115926
	Gov Eq 2 (23)	0	0	0	0	0	0	0	0	0	0	0	0	0	0	0	0	0	0	0	0	0	0	0	0	0	0	0	0	0	0	0	0	0	0	0	0	0	0	0	0	0	0	0	0	-0.0150704	0.168095	0	-0.347594
	Gov Eq 1 (24)	0	0	0	0	0	0	0	0	0	0	0	0	0	0	0	0	0	0	0	0	0	0	0	0	0	0	0	0	0	0	0	0	0	0	0	0	0	0	0	0	0	0	0	0	0	0	0.0295612	0.0144908
	Gov Eq 2 (24)	0	0	0	0	0	0	0	0	0	0	0	0	0	0	0	0	0	0	0	0	0	0	0	0	0	0	0	0	0	0	0	0	0	0	0	0	0	0	0	0	0	0	0	0	0	0	-0.0144908	0.149762
	Gov Eq 1 (25)	0	0	0	0	0	0	0	0	0	0	0	0	0	0	0	0	0	0	0	0	0	0	0	0	0	0	0	0	0	0	0	0	0	0	0	0	0	0	0	0	0	0	0	0	0	0	0	0
	Gov Eq 2 (25)	0	0	0	0	0	0	0	0	0	0	0	0	0	0	0	0	0	0	0	0	0	0	0	0	0	0	0	0	0	0	0	0	0	0	0	0	0	0	0	0	0	0	0	0	0	0	0	0
	Bo Co 1 (1)	0	0	1	0	0	0	0	0	0	0	0	0	0	0	0	0	0	0	0	0	0	0	0	0	0	0	0	0	0	0	0	0	0	0	0	0	0	0	0	0	0	0	0	0	0	0	0	0
	Bo Co 2 (1)	0	0	0	1	0	0	0	0	0	0	0	0	0	0	0	0	0	0	0	0	0	0	0	0	0	0	0	0	0	0	0	0	0	0	0	0	0	0	0	0	0	0	0	0	0	0	0	0
	Bo Co 1 (25)	0	0	0	0	0	0	0	0	0	0	0	0	0	0	0	0	0	0	0	0	0	0	0	0	0	0	0	0	0	0	0	0	0	0	0	0	0	0	0	0	0	0	0	0	0	0	0	0
	Bo Co 2 (25)	0	0	0	0	0	0	0	0	0	0	0	0	0	0	0	0	0	0	0	0	0	0	0	0	0	0	0	0	0	0	0	0	0	0	0	0	0	0	0	0	0	0	0	0	0	0	0	0
	W-F FDM approximation
		33-point grid
	n =	32
		0.03125
		0.0312
	kRIr =	0.01
		0.0313001
		11.9891				Determinant =	1.55455e-08
					PSM	ABAQUS	9 pt	17 pt	25 pt	33 pt
		0.000137081		0.140371	11.9235	11.9500	12.8356	12.1781	12.0392	11.9891
		0.5
			Nodes	1		2		3		4		5		6		7		8		9		10		11		12		13		14		15		16		17		18		19		20		21		22		23
				0		0.03125		0.0625		0.09375		0.125		0.15625		0.1875		0.21875		0.25		0.28125		0.3125		0.34375		0.375		0.40625		0.4375		0.46875		0.5		0.53125		0.5625		0.59375		0.625		0.65625		0.6875
				1		0.953854		0.909149		0.865864		0.823975		0.783459		0.744293		0.706455		0.669922		0.63467		0.600677		0.567921		0.536377		0.506023		0.476837		0.448795		0.421875		0.396053		0.371307		0.347614		0.324951		0.303295		0.282623
				-0.046875		-0.0454216		-0.0439911		-0.0425835		-0.0411987		-0.0398369		-0.0384979		-0.0371819		-0.0358887		-0.0346184		-0.033371		-0.0321465		-0.0309448		-0.0297661		-0.0286102		-0.0274773		-0.0263672		-0.02528		-0.0242157		-0.0231743		-0.0221558		-0.0211601		-0.0201874
				1		0.984375		0.96875		0.953125		0.9375		0.921875		0.90625		0.890625		0.875		0.859375		0.84375		0.828125		0.8125		0.796875		0.78125		0.765625		0.75		0.734375		0.71875		0.703125		0.6875		0.671875		0.65625
				-0.015625		-0.015625		-0.015625		-0.015625		-0.015625		-0.015625		-0.015625		-0.015625		-0.015625		-0.015625		-0.015625		-0.015625		-0.015625		-0.015625		-0.015625		-0.015625		-0.015625		-0.015625		-0.015625		-0.015625		-0.015625		-0.015625		-0.015625
		W0	hkF0	W1	hkF1	W2	hkF2	W3	hkF3	W4	hkF4	W5	hkF5	W6	hkF6	W7	hkF7	W8	hkF8	W9	hkF9	W10	hkF10	W11	hkF11	W12	hkF12	W13	hkF13	W14	hkF14	W15	hkF15	W16	hkF16	W17	hkF17	W18	hkF18	W19	hkF19	W20	hkF20	W21	hkF21	W22	hkF22	W23	hkF23
	Gov Eq 1 (1)	0.0315446	0.01565	-0.0624631	0.000489064	0.0310555	-0.01565	0	0	0	0	0	0	0	0	0	0	0	0	0	0	0	0	0	0	0	0	0	0	0	0	0	0	0	0	0	0	0	0	0	0	0	0	0	0	0	0	0	0
	Gov Eq 2 (1)	-0.01565	1.02344	0	-2.0299	0.01565	0.976562	0	0	0	0	0	0	0	0	0	0	0	0	0	0	0	0	0	0	0	0	0	0	0	0	0	0	0	0	0	0	0	0	0	0	0	0	0	0	0	0	0	0
	Gov Eq 1 (2)	0	0	0.0310555	0.0154055	-0.0614871	0.000489064	0.0305665	-0.0154055	0	0	0	0	0	0	0	0	0	0	0	0	0	0	0	0	0	0	0	0	0	0	0	0	0	0	0	0	0	0	0	0	0	0	0	0	0	0	0	0
	Gov Eq 2 (2)	0	0	-0.0154055	0.976564	0	-1.93718	0.0154055	0.931143	0	0	0	0	0	0	0	0	0	0	0	0	0	0	0	0	0	0	0	0	0	0	0	0	0	0	0	0	0	0	0	0	0	0	0	0	0	0	0	0
	Gov Eq 1 (3)	0	0	0	0	0.0305665	0.015161	-0.0605111	0.000489064	0.0300774	-0.015161	0	0	0	0	0	0	0	0	0	0	0	0	0	0	0	0	0	0	0	0	0	0	0	0	0	0	0	0	0	0	0	0	0	0	0	0	0	0
	Gov Eq 2 (3)	0	0	0	0	-0.015161	0.931145	0	-1.84734	0.015161	0.887154	0	0	0	0	0	0	0	0	0	0	0	0	0	0	0	0	0	0	0	0	0	0	0	0	0	0	0	0	0	0	0	0	0	0	0	0	0	0
	Gov Eq 1 (4)	0	0	0	0	0	0	0.0300774	0.0149164	-0.0595351	0.000489064	0.0295884	-0.0149164	0	0	0	0	0	0	0	0	0	0	0	0	0	0	0	0	0	0	0	0	0	0	0	0	0	0	0	0	0	0	0	0	0	0	0	0
	Gov Eq 2 (4)	0	0	0	0	0	0	-0.0149164	0.887156	0	-1.76035	0.0149164	0.844572	0	0	0	0	0	0	0	0	0	0	0	0	0	0	0	0	0	0	0	0	0	0	0	0	0	0	0	0	0	0	0	0	0	0	0	0
	Gov Eq 1 (5)	0	0	0	0	0	0	0	0	0.0295884	0.0146719	-0.0585591	0.000489064	0.0290993	-0.0146719	0	0	0	0	0	0	0	0	0	0	0	0	0	0	0	0	0	0	0	0	0	0	0	0	0	0	0	0	0	0	0	0	0	0
	Gov Eq 2 (5)	0	0	0	0	0	0	0	0	-0.0146719	0.844574	0	-1.67614	0.0146719	0.803375	0	0	0	0	0	0	0	0	0	0	0	0	0	0	0	0	0	0	0	0	0	0	0	0	0	0	0	0	0	0	0	0	0	0
	Gov Eq 1 (6)	0	0	0	0	0	0	0	0	0	0	0.0290993	0.0144274	-0.0575832	0.000489064	0.0286102	-0.0144274	0	0	0	0	0	0	0	0	0	0	0	0	0	0	0	0	0	0	0	0	0	0	0	0	0	0	0	0	0	0	0	0
	Gov Eq 2 (6)	0	0	0	0	0	0	0	0	0	0	-0.0144274	0.803377	0	-1.59467	0.0144274	0.76354	0	0	0	0	0	0	0	0	0	0	0	0	0	0	0	0	0	0	0	0	0	0	0	0	0	0	0	0	0	0	0	0
	Gov Eq 1 (7)	0	0	0	0	0	0	0	0	0	0	0	0	0.0286102	0.0141828	-0.0566072	0.000489064	0.0281212	-0.0141828	0	0	0	0	0	0	0	0	0	0	0	0	0	0	0	0	0	0	0	0	0	0	0	0	0	0	0	0	0	0
	Gov Eq 2 (7)	0	0	0	0	0	0	0	0	0	0	0	0	-0.0141828	0.763542	0	-1.51591	0.0141828	0.725044	0	0	0	0	0	0	0	0	0	0	0	0	0	0	0	0	0	0	0	0	0	0	0	0	0	0	0	0	0	0
	Gov Eq 1 (8)	0	0	0	0	0	0	0	0	0	0	0	0	0	0	0.0281212	0.0139383	-0.0556312	0.000489064	0.0276321	-0.0139383	0	0	0	0	0	0	0	0	0	0	0	0	0	0	0	0	0	0	0	0	0	0	0	0	0	0	0	0
	Gov Eq 2 (8)	0	0	0	0	0	0	0	0	0	0	0	0	0	0	-0.0139383	0.725046	0	-1.4398	0.0139383	0.687864	0	0	0	0	0	0	0	0	0	0	0	0	0	0	0	0	0	0	0	0	0	0	0	0	0	0	0	0
	Gov Eq 1 (9)	0	0	0	0	0	0	0	0	0	0	0	0	0	0	0	0	0.0276321	0.0136938	-0.0546552	0.000489064	0.027143	-0.0136938	0	0	0	0	0	0	0	0	0	0	0	0	0	0	0	0	0	0	0	0	0	0	0	0	0	0
	Gov Eq 2 (9)	0	0	0	0	0	0	0	0	0	0	0	0	0	0	0	0	-0.0136938	0.687866	0	-1.36629	0.0136938	0.651978	0	0	0	0	0	0	0	0	0	0	0	0	0	0	0	0	0	0	0	0	0	0	0	0	0	0
	Gov Eq 1 (10)	0	0	0	0	0	0	0	0	0	0	0	0	0	0	0	0	0	0	0.027143	0.0134493	-0.0536792	0.000489064	0.026654	-0.0134493	0	0	0	0	0	0	0	0	0	0	0	0	0	0	0	0	0	0	0	0	0	0	0	0
	Gov Eq 2 (10)	0	0	0	0	0	0	0	0	0	0	0	0	0	0	0	0	0	0	-0.0134493	0.651979	0	-1.29535	0.0134493	0.617361	0	0	0	0	0	0	0	0	0	0	0	0	0	0	0	0	0	0	0	0	0	0	0	0
	Gov Eq 1 (11)	0	0	0	0	0	0	0	0	0	0	0	0	0	0	0	0	0	0	0	0	0.026654	0.0132047	-0.0527032	0.000489064	0.0261649	-0.0132047	0	0	0	0	0	0	0	0	0	0	0	0	0	0	0	0	0	0	0	0	0	0
	Gov Eq 2 (11)	0	0	0	0	0	0	0	0	0	0	0	0	0	0	0	0	0	0	0	0	-0.0132047	0.617363	0	-1.22692	0.0132047	0.583992	0	0	0	0	0	0	0	0	0	0	0	0	0	0	0	0	0	0	0	0	0	0
	Gov Eq 1 (12)	0	0	0	0	0	0	0	0	0	0	0	0	0	0	0	0	0	0	0	0	0	0	0.0261649	0.0129602	-0.0517272	0.000489064	0.0256758	-0.0129602	0	0	0	0	0	0	0	0	0	0	0	0	0	0	0	0	0	0	0	0
	Gov Eq 2 (12)	0	0	0	0	0	0	0	0	0	0	0	0	0	0	0	0	0	0	0	0	0	0	-0.0129602	0.583994	0	-1.16096	0.0129602	0.551847	0	0	0	0	0	0	0	0	0	0	0	0	0	0	0	0	0	0	0	0
	Gov Eq 1 (13)	0	0	0	0	0	0	0	0	0	0	0	0	0	0	0	0	0	0	0	0	0	0	0	0	0.0256758	0.0127157	-0.0507513	0.000489064	0.0251868	-0.0127157	0	0	0	0	0	0	0	0	0	0	0	0	0	0	0	0	0	0
	Gov Eq 2 (13)	0	0	0	0	0	0	0	0	0	0	0	0	0	0	0	0	0	0	0	0	0	0	0	0	-0.0127157	0.551849	0	-1.09743	0.0127157	0.520905	0	0	0	0	0	0	0	0	0	0	0	0	0	0	0	0	0	0
	Gov Eq 1 (14)	0	0	0	0	0	0	0	0	0	0	0	0	0	0	0	0	0	0	0	0	0	0	0	0	0	0	0.0251868	0.0124711	-0.0497753	0.000489064	0.0246977	-0.0124711	0	0	0	0	0	0	0	0	0	0	0	0	0	0	0	0
	Gov Eq 2 (14)	0	0	0	0	0	0	0	0	0	0	0	0	0	0	0	0	0	0	0	0	0	0	0	0	0	0	-0.0124711	0.520906	0	-1.03628	0.0124711	0.49114	0	0	0	0	0	0	0	0	0	0	0	0	0	0	0	0
	Gov Eq 1 (15)	0	0	0	0	0	0	0	0	0	0	0	0	0	0	0	0	0	0	0	0	0	0	0	0	0	0	0	0	0.0246977	0.0122266	-0.0487993	0.000489064	0.0242087	-0.0122266	0	0	0	0	0	0	0	0	0	0	0	0	0	0
	Gov Eq 2 (15)	0	0	0	0	0	0	0	0	0	0	0	0	0	0	0	0	0	0	0	0	0	0	0	0	0	0	0	0	-0.0122266	0.491142	0	-0.977458	0.0122266	0.462532	0	0	0	0	0	0	0	0	0	0	0	0	0	0
	Gov Eq 1 (16)	0	0	0	0	0	0	0	0	0	0	0	0	0	0	0	0	0	0	0	0	0	0	0	0	0	0	0	0	0	0	0.0242087	0.0119821	-0.0478233	0.000489064	0.0237196	-0.0119821	0	0	0	0	0	0	0	0	0	0	0	0
	Gov Eq 2 (16)	0	0	0	0	0	0	0	0	0	0	0	0	0	0	0	0	0	0	0	0	0	0	0	0	0	0	0	0	0	0	-0.0119821	0.462534	0	-0.920925	0.0119821	0.435057	0	0	0	0	0	0	0	0	0	0	0	0
	Gov Eq 1 (17)	0	0	0	0	0	0	0	0	0	0	0	0	0	0	0	0	0	0	0	0	0	0	0	0	0	0	0	0	0	0	0	0	0.0237196	0.0117375	-0.0468473	0.000489064	0.0232305	-0.0117375	0	0	0	0	0	0	0	0	0	0
	Gov Eq 2 (17)	0	0	0	0	0	0	0	0	0	0	0	0	0	0	0	0	0	0	0	0	0	0	0	0	0	0	0	0	0	0	0	0	-0.0117375	0.435059	0	-0.866633	0.0117375	0.408691	0	0	0	0	0	0	0	0	0	0
	Gov Eq 1 (18)	0	0	0	0	0	0	0	0	0	0	0	0	0	0	0	0	0	0	0	0	0	0	0	0	0	0	0	0	0	0	0	0	0	0	0.0232305	0.011493	-0.0458713	0.000489064	0.0227415	-0.011493	0	0	0	0	0	0	0	0
	Gov Eq 2 (18)	0	0	0	0	0	0	0	0	0	0	0	0	0	0	0	0	0	0	0	0	0	0	0	0	0	0	0	0	0	0	0	0	0	0	-0.011493	0.408693	0	-0.814537	0.011493	0.383413	0	0	0	0	0	0	0	0
	Gov Eq 1 (19)	0	0	0	0	0	0	0	0	0	0	0	0	0	0	0	0	0	0	0	0	0	0	0	0	0	0	0	0	0	0	0	0	0	0	0	0	0.0227415	0.0112485	-0.0448953	0.000489064	0.0222524	-0.0112485	0	0	0	0	0	0
	Gov Eq 2 (19)	0	0	0	0	0	0	0	0	0	0	0	0	0	0	0	0	0	0	0	0	0	0	0	0	0	0	0	0	0	0	0	0	0	0	0	0	-0.0112485	0.383415	0	-0.76459	0.0112485	0.3592	0	0	0	0	0	0
	Gov Eq 1 (20)	0	0	0	0	0	0	0	0	0	0	0	0	0	0	0	0	0	0	0	0	0	0	0	0	0	0	0	0	0	0	0	0	0	0	0	0	0	0	0.0222524	0.0110039	-0.0439194	0.000489064	0.0217633	-0.0110039	0	0	0	0
	Gov Eq 2 (20)	0	0	0	0	0	0	0	0	0	0	0	0	0	0	0	0	0	0	0	0	0	0	0	0	0	0	0	0	0	0	0	0	0	0	0	0	0	0	-0.0110039	0.359201	0	-0.716748	0.0110039	0.336027	0	0	0	0
	Gov Eq 1 (21)	0	0	0	0	0	0	0	0	0	0	0	0	0	0	0	0	0	0	0	0	0	0	0	0	0	0	0	0	0	0	0	0	0	0	0	0	0	0	0	0	0.0217633	0.0107594	-0.0429434	0.000489064	0.0212743	-0.0107594	0	0
	Gov Eq 2 (21)	0	0	0	0	0	0	0	0	0	0	0	0	0	0	0	0	0	0	0	0	0	0	0	0	0	0	0	0	0	0	0	0	0	0	0	0	0	0	0	0	-0.0107594	0.336029	0	-0.670965	0.0107594	0.313873	0	0
	Gov Eq 1 (22)	0	0	0	0	0	0	0	0	0	0	0	0	0	0	0	0	0	0	0	0	0	0	0	0	0	0	0	0	0	0	0	0	0	0	0	0	0	0	0	0	0	0	0.0212743	0.0105149	-0.0419674	0.000489064	0.0207852	-0.0105149
	Gov Eq 2 (22)	0	0	0	0	0	0	0	0	0	0	0	0	0	0	0	0	0	0	0	0	0	0	0	0	0	0	0	0	0	0	0	0	0	0	0	0	0	0	0	0	0	0	-0.0105149	0.313875	0	-0.627194	0.0105149	0.292715
	Gov Eq 1 (23)	0	0	0	0	0	0	0	0	0	0	0	0	0	0	0	0	0	0	0	0	0	0	0	0	0	0	0	0	0	0	0	0	0	0	0	0	0	0	0	0	0	0	0	0	0.0207852	0.0102703	-0.0409914	0.000489064
	Gov Eq 2 (23)	0	0	0	0	0	0	0	0	0	0	0	0	0	0	0	0	0	0	0	0	0	0	0	0	0	0	0	0	0	0	0	0	0	0	0	0	0	0	0	0	0	0	0	0	-0.0102703	0.292717	0	-0.585391
	Gov Eq 1 (24)	0	0	0	0	0	0	0	0	0	0	0	0	0	0	0	0	0	0	0	0	0	0	0	0	0	0	0	0	0	0	0	0	0	0	0	0	0	0	0	0	0	0	0	0	0	0	0.0202961	0.0100258
	Gov Eq 2 (24)	0	0	0	0	0	0	0	0	0	0	0	0	0	0	0	0	0	0	0	0	0	0	0	0	0	0	0	0	0	0	0	0	0	0	0	0	0	0	0	0	0	0	0	0	0	0	-0.0100258	0.272532
	Gov Eq 1 (25)	0	0	0	0	0	0	0	0	0	0	0	0	0	0	0	0	0	0	0	0	0	0	0	0	0	0	0	0	0	0	0	0	0	0	0	0	0	0	0	0	0	0	0	0	0	0	0	0
	Gov Eq 2 (25)	0	0	0	0	0	0	0	0	0	0	0	0	0	0	0	0	0	0	0	0	0	0	0	0	0	0	0	0	0	0	0	0	0	0	0	0	0	0	0	0	0	0	0	0	0	0	0	0
	Gov Eq 1 (26)	0	0	0	0	0	0	0	0	0	0	0	0	0	0	0	0	0	0	0	0	0	0	0	0	0	0	0	0	0	0	0	0	0	0	0	0	0	0	0	0	0	0	0	0	0	0	0	0
	Gov Eq 2 (26)	0	0	0	0	0	0	0	0	0	0	0	0	0	0	0	0	0	0	0	0	0	0	0	0	0	0	0	0	0	0	0	0	0	0	0	0	0	0	0	0	0	0	0	0	0	0	0	0
	Gov Eq 1 (27)	0	0	0	0	0	0	0	0	0	0	0	0	0	0	0	0	0	0	0	0	0	0	0	0	0	0	0	0	0	0	0	0	0	0	0	0	0	0	0	0	0	0	0	0	0	0	0	0
	Gov Eq 2 (27)	0	0	0	0	0	0	0	0	0	0	0	0	0	0	0	0	0	0	0	0	0	0	0	0	0	0	0	0	0	0	0	0	0	0	0	0	0	0	0	0	0	0	0	0	0	0	0	0
	Gov Eq 1 (28)	0	0	0	0	0	0	0	0	0	0	0	0	0	0	0	0	0	0	0	0	0	0	0	0	0	0	0	0	0	0	0	0	0	0	0	0	0	0	0	0	0	0	0	0	0	0	0	0
	Gov Eq 2 (28)	0	0	0	0	0	0	0	0	0	0	0	0	0	0	0	0	0	0	0	0	0	0	0	0	0	0	0	0	0	0	0	0	0	0	0	0	0	0	0	0	0	0	0	0	0	0	0	0
	Gov Eq 1 (29)	0	0	0	0	0	0	0	0	0	0	0	0	0	0	0	0	0	0	0	0	0	0	0	0	0	0	0	0	0	0	0	0	0	0	0	0	0	0	0	0	0	0	0	0	0	0	0	0
	Gov Eq 2 (29)	0	0	0	0	0	0	0	0	0	0	0	0	0	0	0	0	0	0	0	0	0	0	0	0	0	0	0	0	0	0	0	0	0	0	0	0	0	0	0	0	0	0	0	0	0	0	0	0
	Gov Eq 1 (30)	0	0	0	0	0	0	0	0	0	0	0	0	0	0	0	0	0	0	0	0	0	0	0	0	0	0	0	0	0	0	0	0	0	0	0	0	0	0	0	0	0	0	0	0	0	0	0	0
	Gov Eq 2 (30)	0	0	0	0	0	0	0	0	0	0	0	0	0	0	0	0	0	0	0	0	0	0	0	0	0	0	0	0	0	0	0	0	0	0	0	0	0	0	0	0	0	0	0	0	0	0	0	0
	Gov Eq 1 (31)	0	0	0	0	0	0	0	0	0	0	0	0	0	0	0	0	0	0	0	0	0	0	0	0	0	0	0	0	0	0	0	0	0	0	0	0	0	0	0	0	0	0	0	0	0	0	0	0
	Gov Eq 2 (31)	0	0	0	0	0	0	0	0	0	0	0	0	0	0	0	0	0	0	0	0	0	0	0	0	0	0	0	0	0	0	0	0	0	0	0	0	0	0	0	0	0	0	0	0	0	0	0	0
	Gov Eq 1 (32)	0	0	0	0	0	0	0	0	0	0	0	0	0	0	0	0	0	0	0	0	0	0	0	0	0	0	0	0	0	0	0	0	0	0	0	0	0	0	0	0	0	0	0	0	0	0	0	0
	Gov Eq 2 (32)	0	0	0	0	0	0	0	0	0	0	0	0	0	0	0	0	0	0	0	0	0	0	0	0	0	0	0	0	0	0	0	0	0	0	0	0	0	0	0	0	0	0	0	0	0	0	0	0
	Gov Eq 1 (33)	0	0	0	0	0	0	0	0	0	0	0	0	0	0	0	0	0	0	0	0	0	0	0	0	0	0	0	0	0	0	0	0	0	0	0	0	0	0	0	0	0	0	0	0	0	0	0	0
	Gov Eq 2 (33)	0	0	0	0	0	0	0	0	0	0	0	0	0	0	0	0	0	0	0	0	0	0	0	0	0	0	0	0	0	0	0	0	0	0	0	0	0	0	0	0	0	0	0	0	0	0	0	0
	Bo Co 1 (1)	0	0	1	0	0	0	0	0	0	0	0	0	0	0	0	0	0	0	0	0	0	0	0	0	0	0	0	0	0	0	0	0	0	0	0	0	0	0	0	0	0	0	0	0	0	0	0	0
	Bo Co 2 (1)	0	0	0	1	0	0	0	0	0	0	0	0	0	0	0	0	0	0	0	0	0	0	0	0	0	0	0	0	0	0	0	0	0	0	0	0	0	0	0	0	0	0	0	0	0	0	0	0
	Bo Co 1 (33)	0	0	0	0	0	0	0	0	0	0	0	0	0	0	0	0	0	0	0	0	0	0	0	0	0	0	0	0	0	0	0	0	0	0	0	0	0	0	0	0	0	0	0	0	0	0	0	0
	Bo Co 2 (33)	0	0	0	0	0	0	0	0	0	0	0	0	0	0	0	0	0	0	0	0	0	0	0	0	0	0	0	0	0	0	0	0	0	0	0	0	0	0	0	0	0	0	0	0	0	0	0	0
	W-F FDM approximation
		41-point grid
	n =	40
		0.025
		0.0312
	kRIr =	0.01
		0.0200321
		11.9657				Determinant =	-3.47974e-07
					PSM	ABAQUS	9 pt	17 pt	25 pt	33 pt	41
		5.59286e-05		0.0894858	11.9235	11.9500	12.8356	12.1781	12.0392	11.9891	11.9657
		0.5
			Nodes	1		2		3		4		5		6		7		8		9		10		11		12		13		14		15		16		17		18		19		20		21		22		23
				0		0.025		0.05		0.075		0.1		0.125		0.15		0.175		0.2		0.225		0.25		0.275		0.3		0.325		0.35		0.375		0.4		0.425		0.45		0.475		0.5		0.525		0.55
				1		0.962967		0.926859		0.891666		0.857375		0.823975		0.791453		0.759799		0.729		0.699045		0.669922		0.641619		0.614125		0.587428		0.561516		0.536377		0.512		0.488373		0.465484		0.443322		0.421875		0.401131		0.381078
				-0.0375		-0.0365684		-0.0356484		-0.0347402		-0.0338438		-0.032959		-0.0320859		-0.0312246		-0.030375		-0.0295371		-0.0287109		-0.0278965		-0.0270937		-0.0263027		-0.0255234		-0.0247559		-0.024		-0.0232559		-0.0225234		-0.0218027		-0.0210938		-0.0203965		-0.0197109
				1		0.9875		0.975		0.9625		0.95		0.9375		0.925		0.9125		0.9		0.8875		0.875		0.8625		0.85		0.8375		0.825		0.8125		0.8		0.7875		0.775		0.7625		0.75		0.7375		0.725
				-0.0125		-0.0125		-0.0125		-0.0125		-0.0125		-0.0125		-0.0125		-0.0125		-0.0125		-0.0125		-0.0125		-0.0125		-0.0125		-0.0125		-0.0125		-0.0125		-0.0125		-0.0125		-0.0125		-0.0125		-0.0125		-0.0125		-0.0125
		W0	hkF0	W1	hkF1	W2	hkF2	W3	hkF3	W4	hkF4	W5	hkF5	W6	hkF6	W7	hkF7	W8	hkF8	W9	hkF9	W10	hkF10	W11	hkF11	W12	hkF12	W13	hkF13	W14	hkF14	W15	hkF15	W16	hkF16	W17	hkF17	W18	hkF18	W19	hkF19	W20	hkF20	W21	hkF21	W22	hkF22	W23	hkF23
	Gov Eq 1 (1)	0.0201573	0.010016	-0.0400082	0.000250401	0.0199069	-0.010016	0	0	0	0	0	0	0	0	0	0	0	0	0	0	0	0	0	0	0	0	0	0	0	0	0	0	0	0	0	0	0	0	0	0	0	0	0	0	0	0	0	0
	Gov Eq 2 (1)	-0.010016	1.01875	0	-2.01914	0.010016	0.98125	0	0	0	0	0	0	0	0	0	0	0	0	0	0	0	0	0	0	0	0	0	0	0	0	0	0	0	0	0	0	0	0	0	0	0	0	0	0	0	0	0	0
	Gov Eq 1 (2)	0	0	0.0199069	0.00989083	-0.0395081	0.000250401	0.0196565	-0.00989083	0	0	0	0	0	0	0	0	0	0	0	0	0	0	0	0	0	0	0	0	0	0	0	0	0	0	0	0	0	0	0	0	0	0	0	0	0	0	0	0
	Gov Eq 2 (2)	0	0	-0.00989083	0.981251	0	-1.94485	0.00989083	0.944683	0	0	0	0	0	0	0	0	0	0	0	0	0	0	0	0	0	0	0	0	0	0	0	0	0	0	0	0	0	0	0	0	0	0	0	0	0	0	0	0
	Gov Eq 1 (3)	0	0	0	0	0.0196565	0.00976562	-0.039008	0.000250401	0.019406	-0.00976562	0	0	0	0	0	0	0	0	0	0	0	0	0	0	0	0	0	0	0	0	0	0	0	0	0	0	0	0	0	0	0	0	0	0	0	0	0	0
	Gov Eq 2 (3)	0	0	0	0	-0.00976562	0.944684	0	-1.87242	0.00976562	0.909035	0	0	0	0	0	0	0	0	0	0	0	0	0	0	0	0	0	0	0	0	0	0	0	0	0	0	0	0	0	0	0	0	0	0	0	0	0	0
	Gov Eq 1 (4)	0	0	0	0	0	0	0.019406	0.00964042	-0.0385079	0.000250401	0.0191556	-0.00964042	0	0	0	0	0	0	0	0	0	0	0	0	0	0	0	0	0	0	0	0	0	0	0	0	0	0	0	0	0	0	0	0	0	0	0	0
	Gov Eq 2 (4)	0	0	0	0	0	0	-0.00964042	0.909036	0	-1.80181	0.00964042	0.874296	0	0	0	0	0	0	0	0	0	0	0	0	0	0	0	0	0	0	0	0	0	0	0	0	0	0	0	0	0	0	0	0	0	0	0	0
	Gov Eq 1 (5)	0	0	0	0	0	0	0	0	0.0191556	0.00951522	-0.0380078	0.000250401	0.0189052	-0.00951522	0	0	0	0	0	0	0	0	0	0	0	0	0	0	0	0	0	0	0	0	0	0	0	0	0	0	0	0	0	0	0	0	0	0
	Gov Eq 2 (5)	0	0	0	0	0	0	0	0	-0.00951522	0.874297	0	-1.73301	0.00951522	0.840453	0	0	0	0	0	0	0	0	0	0	0	0	0	0	0	0	0	0	0	0	0	0	0	0	0	0	0	0	0	0	0	0	0	0
	Gov Eq 1 (6)	0	0	0	0	0	0	0	0	0	0	0.0189052	0.00939002	-0.0375077	0.000250401	0.0186548	-0.00939002	0	0	0	0	0	0	0	0	0	0	0	0	0	0	0	0	0	0	0	0	0	0	0	0	0	0	0	0	0	0	0	0
	Gov Eq 2 (6)	0	0	0	0	0	0	0	0	0	0	-0.00939002	0.840454	0	-1.66599	0.00939002	0.807495	0	0	0	0	0	0	0	0	0	0	0	0	0	0	0	0	0	0	0	0	0	0	0	0	0	0	0	0	0	0	0	0
	Gov Eq 1 (7)	0	0	0	0	0	0	0	0	0	0	0	0	0.0186548	0.00926482	-0.0370076	0.000250401	0.0184044	-0.00926482	0	0	0	0	0	0	0	0	0	0	0	0	0	0	0	0	0	0	0	0	0	0	0	0	0	0	0	0	0	0
	Gov Eq 2 (7)	0	0	0	0	0	0	0	0	0	0	0	0	-0.00926482	0.807496	0	-1.60073	0.00926482	0.77541	0	0	0	0	0	0	0	0	0	0	0	0	0	0	0	0	0	0	0	0	0	0	0	0	0	0	0	0	0	0
	Gov Eq 1 (8)	0	0	0	0	0	0	0	0	0	0	0	0	0	0	0.0184044	0.00913962	-0.0365075	0.000250401	0.018154	-0.00913962	0	0	0	0	0	0	0	0	0	0	0	0	0	0	0	0	0	0	0	0	0	0	0	0	0	0	0	0
	Gov Eq 2 (8)	0	0	0	0	0	0	0	0	0	0	0	0	0	0	-0.00913962	0.775411	0	-1.5372	0.00913962	0.744187	0	0	0	0	0	0	0	0	0	0	0	0	0	0	0	0	0	0	0	0	0	0	0	0	0	0	0	0
	Gov Eq 1 (9)	0	0	0	0	0	0	0	0	0	0	0	0	0	0	0	0	0.018154	0.00901442	-0.0360074	0.000250401	0.0179036	-0.00901442	0	0	0	0	0	0	0	0	0	0	0	0	0	0	0	0	0	0	0	0	0	0	0	0	0	0
	Gov Eq 2 (9)	0	0	0	0	0	0	0	0	0	0	0	0	0	0	0	0	-0.00901442	0.744188	0	-1.47538	0.00901442	0.713813	0	0	0	0	0	0	0	0	0	0	0	0	0	0	0	0	0	0	0	0	0	0	0	0	0	0
	Gov Eq 1 (10)	0	0	0	0	0	0	0	0	0	0	0	0	0	0	0	0	0	0	0.0179036	0.00888922	-0.0355073	0.000250401	0.0176532	-0.00888922	0	0	0	0	0	0	0	0	0	0	0	0	0	0	0	0	0	0	0	0	0	0	0	0
	Gov Eq 2 (10)	0	0	0	0	0	0	0	0	0	0	0	0	0	0	0	0	0	0	-0.00888922	0.713813	0	-1.41524	0.00888922	0.684276	0	0	0	0	0	0	0	0	0	0	0	0	0	0	0	0	0	0	0	0	0	0	0	0
	Gov Eq 1 (11)	0	0	0	0	0	0	0	0	0	0	0	0	0	0	0	0	0	0	0	0	0.0176532	0.00876402	-0.0350072	0.000250401	0.0174028	-0.00876402	0	0	0	0	0	0	0	0	0	0	0	0	0	0	0	0	0	0	0	0	0	0
	Gov Eq 2 (11)	0	0	0	0	0	0	0	0	0	0	0	0	0	0	0	0	0	0	0	0	-0.00876402	0.684277	0	-1.35677	0.00876402	0.655566	0	0	0	0	0	0	0	0	0	0	0	0	0	0	0	0	0	0	0	0	0	0
	Gov Eq 1 (12)	0	0	0	0	0	0	0	0	0	0	0	0	0	0	0	0	0	0	0	0	0	0	0.0174028	0.00863882	-0.0345071	0.000250401	0.0171524	-0.00863882	0	0	0	0	0	0	0	0	0	0	0	0	0	0	0	0	0	0	0	0
	Gov Eq 2 (12)	0	0	0	0	0	0	0	0	0	0	0	0	0	0	0	0	0	0	0	0	0	0	-0.00863882	0.655567	0	-1.29994	0.00863882	0.627671	0	0	0	0	0	0	0	0	0	0	0	0	0	0	0	0	0	0	0	0
	Gov Eq 1 (13)	0	0	0	0	0	0	0	0	0	0	0	0	0	0	0	0	0	0	0	0	0	0	0	0	0.0171524	0.00851362	-0.0340069	0.000250401	0.016902	-0.00851362	0	0	0	0	0	0	0	0	0	0	0	0	0	0	0	0	0	0
	Gov Eq 2 (13)	0	0	0	0	0	0	0	0	0	0	0	0	0	0	0	0	0	0	0	0	0	0	0	0	-0.00851362	0.627672	0	-1.24473	0.00851362	0.600578	0	0	0	0	0	0	0	0	0	0	0	0	0	0	0	0	0	0
	Gov Eq 1 (14)	0	0	0	0	0	0	0	0	0	0	0	0	0	0	0	0	0	0	0	0	0	0	0	0	0	0	0.016902	0.00838842	-0.0335068	0.000250401	0.0166516	-0.00838842	0	0	0	0	0	0	0	0	0	0	0	0	0	0	0	0
	Gov Eq 2 (14)	0	0	0	0	0	0	0	0	0	0	0	0	0	0	0	0	0	0	0	0	0	0	0	0	0	0	-0.00838842	0.600579	0	-1.19111	0.00838842	0.574276	0	0	0	0	0	0	0	0	0	0	0	0	0	0	0	0
	Gov Eq 1 (15)	0	0	0	0	0	0	0	0	0	0	0	0	0	0	0	0	0	0	0	0	0	0	0	0	0	0	0	0	0.0166516	0.00826322	-0.0330067	0.000250401	0.0164012	-0.00826322	0	0	0	0	0	0	0	0	0	0	0	0	0	0
	Gov Eq 2 (15)	0	0	0	0	0	0	0	0	0	0	0	0	0	0	0	0	0	0	0	0	0	0	0	0	0	0	0	0	-0.00826322	0.574277	0	-1.13906	0.00826322	0.548754	0	0	0	0	0	0	0	0	0	0	0	0	0	0
	Gov Eq 1 (16)	0	0	0	0	0	0	0	0	0	0	0	0	0	0	0	0	0	0	0	0	0	0	0	0	0	0	0	0	0	0	0.0164012	0.00813802	-0.0325066	0.000250401	0.0161508	-0.00813802	0	0	0	0	0	0	0	0	0	0	0	0
	Gov Eq 2 (16)	0	0	0	0	0	0	0	0	0	0	0	0	0	0	0	0	0	0	0	0	0	0	0	0	0	0	0	0	0	0	-0.00813802	0.548755	0	-1.08855	0.00813802	0.523999	0	0	0	0	0	0	0	0	0	0	0	0
	Gov Eq 1 (17)	0	0	0	0	0	0	0	0	0	0	0	0	0	0	0	0	0	0	0	0	0	0	0	0	0	0	0	0	0	0	0	0	0.0161508	0.00801282	-0.0320065	0.000250401	0.0159004	-0.00801282	0	0	0	0	0	0	0	0	0	0
	Gov Eq 2 (17)	0	0	0	0	0	0	0	0	0	0	0	0	0	0	0	0	0	0	0	0	0	0	0	0	0	0	0	0	0	0	0	0	-0.00801282	0.524	0	-1.03957	0.00801282	0.5	0	0	0	0	0	0	0	0	0	0
	Gov Eq 1 (18)	0	0	0	0	0	0	0	0	0	0	0	0	0	0	0	0	0	0	0	0	0	0	0	0	0	0	0	0	0	0	0	0	0	0	0.0159004	0.00788762	-0.0315064	0.000250401	0.01565	-0.00788762	0	0	0	0	0	0	0	0
	Gov Eq 2 (18)	0	0	0	0	0	0	0	0	0	0	0	0	0	0	0	0	0	0	0	0	0	0	0	0	0	0	0	0	0	0	0	0	0	0	-0.00788762	0.500001	0	-0.992084	0.00788762	0.476745	0	0	0	0	0	0	0	0
	Gov Eq 1 (19)	0	0	0	0	0	0	0	0	0	0	0	0	0	0	0	0	0	0	0	0	0	0	0	0	0	0	0	0	0	0	0	0	0	0	0	0	0.01565	0.00776242	-0.0310063	0.000250401	0.0153996	-0.00776242	0	0	0	0	0	0
	Gov Eq 2 (19)	0	0	0	0	0	0	0	0	0	0	0	0	0	0	0	0	0	0	0	0	0	0	0	0	0	0	0	0	0	0	0	0	0	0	0	0	-0.00776242	0.476746	0	-0.946077	0.00776242	0.454223	0	0	0	0	0	0
	Gov Eq 1 (20)	0	0	0	0	0	0	0	0	0	0	0	0	0	0	0	0	0	0	0	0	0	0	0	0	0	0	0	0	0	0	0	0	0	0	0	0	0	0	0.0153996	0.00763722	-0.0305062	0.000250401	0.0151492	-0.00763722	0	0	0	0
	Gov Eq 2 (20)	0	0	0	0	0	0	0	0	0	0	0	0	0	0	0	0	0	0	0	0	0	0	0	0	0	0	0	0	0	0	0	0	0	0	0	0	0	0	-0.00763722	0.454224	0	-0.901522	0.00763722	0.432421	0	0	0	0
	Gov Eq 1 (21)	0	0	0	0	0	0	0	0	0	0	0	0	0	0	0	0	0	0	0	0	0	0	0	0	0	0	0	0	0	0	0	0	0	0	0	0	0	0	0	0	0.0151492	0.00751202	-0.0300061	0.000250401	0.0148988	-0.00751202	0	0
	Gov Eq 2 (21)	0	0	0	0	0	0	0	0	0	0	0	0	0	0	0	0	0	0	0	0	0	0	0	0	0	0	0	0	0	0	0	0	0	0	0	0	0	0	0	0	-0.00751202	0.432422	0	-0.858397	0.00751202	0.411328	0	0
	Gov Eq 1 (22)	0	0	0	0	0	0	0	0	0	0	0	0	0	0	0	0	0	0	0	0	0	0	0	0	0	0	0	0	0	0	0	0	0	0	0	0	0	0	0	0	0	0	0.0148988	0.00738682	-0.029506	0.000250401	0.0146484	-0.00738682
	Gov Eq 2 (22)	0	0	0	0	0	0	0	0	0	0	0	0	0	0	0	0	0	0	0	0	0	0	0	0	0	0	0	0	0	0	0	0	0	0	0	0	0	0	0	0	0	0	-0.00738682	0.411329	0	-0.816676	0.00738682	0.390933
	Gov Eq 1 (23)	0	0	0	0	0	0	0	0	0	0	0	0	0	0	0	0	0	0	0	0	0	0	0	0	0	0	0	0	0	0	0	0	0	0	0	0	0	0	0	0	0	0	0	0	0.0146484	0.00726162	-0.0290059	0.000250401
	Gov Eq 2 (23)	0	0	0	0	0	0	0	0	0	0	0	0	0	0	0	0	0	0	0	0	0	0	0	0	0	0	0	0	0	0	0	0	0	0	0	0	0	0	0	0	0	0	0	0	-0.00726162	0.390934	0	-0.776338
	Gov Eq 1 (24)	0	0	0	0	0	0	0	0	0	0	0	0	0	0	0	0	0	0	0	0	0	0	0	0	0	0	0	0	0	0	0	0	0	0	0	0	0	0	0	0	0	0	0	0	0	0	0.014398	0.00713642
	Gov Eq 2 (24)	0	0	0	0	0	0	0	0	0	0	0	0	0	0	0	0	0	0	0	0	0	0	0	0	0	0	0	0	0	0	0	0	0	0	0	0	0	0	0	0	0	0	0	0	0	0	-0.00713642	0.371224
	Gov Eq 1 (25)	0	0	0	0	0	0	0	0	0	0	0	0	0	0	0	0	0	0	0	0	0	0	0	0	0	0	0	0	0	0	0	0	0	0	0	0	0	0	0	0	0	0	0	0	0	0	0	0
	Gov Eq 2 (25)	0	0	0	0	0	0	0	0	0	0	0	0	0	0	0	0	0	0	0	0	0	0	0	0	0	0	0	0	0	0	0	0	0	0	0	0	0	0	0	0	0	0	0	0	0	0	0	0
	Gov Eq 1 (26)	0	0	0	0	0	0	0	0	0	0	0	0	0	0	0	0	0	0	0	0	0	0	0	0	0	0	0	0	0	0	0	0	0	0	0	0	0	0	0	0	0	0	0	0	0	0	0	0
	Gov Eq 2 (26)	0	0	0	0	0	0	0	0	0	0	0	0	0	0	0	0	0	0	0	0	0	0	0	0	0	0	0	0	0	0	0	0	0	0	0	0	0	0	0	0	0	0	0	0	0	0	0	0
	Gov Eq 1 (27)	0	0	0	0	0	0	0	0	0	0	0	0	0	0	0	0	0	0	0	0	0	0	0	0	0	0	0	0	0	0	0	0	0	0	0	0	0	0	0	0	0	0	0	0	0	0	0	0
	Gov Eq 2 (27)	0	0	0	0	0	0	0	0	0	0	0	0	0	0	0	0	0	0	0	0	0	0	0	0	0	0	0	0	0	0	0	0	0	0	0	0	0	0	0	0	0	0	0	0	0	0	0	0
	Gov Eq 1 (28)	0	0	0	0	0	0	0	0	0	0	0	0	0	0	0	0	0	0	0	0	0	0	0	0	0	0	0	0	0	0	0	0	0	0	0	0	0	0	0	0	0	0	0	0	0	0	0	0
	Gov Eq 2 (28)	0	0	0	0	0	0	0	0	0	0	0	0	0	0	0	0	0	0	0	0	0	0	0	0	0	0	0	0	0	0	0	0	0	0	0	0	0	0	0	0	0	0	0	0	0	0	0	0
	Gov Eq 1 (29)	0	0	0	0	0	0	0	0	0	0	0	0	0	0	0	0	0	0	0	0	0	0	0	0	0	0	0	0	0	0	0	0	0	0	0	0	0	0	0	0	0	0	0	0	0	0	0	0
	Gov Eq 2 (29)	0	0	0	0	0	0	0	0	0	0	0	0	0	0	0	0	0	0	0	0	0	0	0	0	0	0	0	0	0	0	0	0	0	0	0	0	0	0	0	0	0	0	0	0	0	0	0	0
	Gov Eq 1 (30)	0	0	0	0	0	0	0	0	0	0	0	0	0	0	0	0	0	0	0	0	0	0	0	0	0	0	0	0	0	0	0	0	0	0	0	0	0	0	0	0	0	0	0	0	0	0	0	0
	Gov Eq 2 (30)	0	0	0	0	0	0	0	0	0	0	0	0	0	0	0	0	0	0	0	0	0	0	0	0	0	0	0	0	0	0	0	0	0	0	0	0	0	0	0	0	0	0	0	0	0	0	0	0
	Gov Eq 1 (31)	0	0	0	0	0	0	0	0	0	0	0	0	0	0	0	0	0	0	0	0	0	0	0	0	0	0	0	0	0	0	0	0	0	0	0	0	0	0	0	0	0	0	0	0	0	0	0	0
	Gov Eq 2 (31)	0	0	0	0	0	0	0	0	0	0	0	0	0	0	0	0	0	0	0	0	0	0	0	0	0	0	0	0	0	0	0	0	0	0	0	0	0	0	0	0	0	0	0	0	0	0	0	0
	Gov Eq 1 (32)	0	0	0	0	0	0	0	0	0	0	0	0	0	0	0	0	0	0	0	0	0	0	0	0	0	0	0	0	0	0	0	0	0	0	0	0	0	0	0	0	0	0	0	0	0	0	0	0
	Gov Eq 2 (32)	0	0	0	0	0	0	0	0	0	0	0	0	0	0	0	0	0	0	0	0	0	0	0	0	0	0	0	0	0	0	0	0	0	0	0	0	0	0	0	0	0	0	0	0	0	0	0	0
	Gov Eq 1 (33)	0	0	0	0	0	0	0	0	0	0	0	0	0	0	0	0	0	0	0	0	0	0	0	0	0	0	0	0	0	0	0	0	0	0	0	0	0	0	0	0	0	0	0	0	0	0	0	0
	Gov Eq 2 (33)	0	0	0	0	0	0	0	0	0	0	0	0	0	0	0	0	0	0	0	0	0	0	0	0	0	0	0	0	0	0	0	0	0	0	0	0	0	0	0	0	0	0	0	0	0	0	0	0
	Gov Eq 1 (34)	0	0	0	0	0	0	0	0	0	0	0	0	0	0	0	0	0	0	0	0	0	0	0	0	0	0	0	0	0	0	0	0	0	0	0	0	0	0	0	0	0	0	0	0	0	0	0	0
	Gov Eq 2 (34)	0	0	0	0	0	0	0	0	0	0	0	0	0	0	0	0	0	0	0	0	0	0	0	0	0	0	0	0	0	0	0	0	0	0	0	0	0	0	0	0	0	0	0	0	0	0	0	0
	Gov Eq 1 (35)	0	0	0	0	0	0	0	0	0	0	0	0	0	0	0	0	0	0	0	0	0	0	0	0	0	0	0	0	0	0	0	0	0	0	0	0	0	0	0	0	0	0	0	0	0	0	0	0
	Gov Eq 2 (35)	0	0	0	0	0	0	0	0	0	0	0	0	0	0	0	0	0	0	0	0	0	0	0	0	0	0	0	0	0	0	0	0	0	0	0	0	0	0	0	0	0	0	0	0	0	0	0	0
	Gov Eq 1 (36)	0	0	0	0	0	0	0	0	0	0	0	0	0	0	0	0	0	0	0	0	0	0	0	0	0	0	0	0	0	0	0	0	0	0	0	0	0	0	0	0	0	0	0	0	0	0	0	0
	Gov Eq 2 (36)	0	0	0	0	0	0	0	0	0	0	0	0	0	0	0	0	0	0	0	0	0	0	0	0	0	0	0	0	0	0	0	0	0	0	0	0	0	0	0	0	0	0	0	0	0	0	0	0
	Gov Eq 1 (37)	0	0	0	0	0	0	0	0	0	0	0	0	0	0	0	0	0	0	0	0	0	0	0	0	0	0	0	0	0	0	0	0	0	0	0	0	0	0	0	0	0	0	0	0	0	0	0	0
	Gov Eq 2 (37)	0	0	0	0	0	0	0	0	0	0	0	0	0	0	0	0	0	0	0	0	0	0	0	0	0	0	0	0	0	0	0	0	0	0	0	0	0	0	0	0	0	0	0	0	0	0	0	0
	Gov Eq 1 (38)	0	0	0	0	0	0	0	0	0	0	0	0	0	0	0	0	0	0	0	0	0	0	0	0	0	0	0	0	0	0	0	0	0	0	0	0	0	0	0	0	0	0	0	0	0	0	0	0
	Gov Eq 2 (38)	0	0	0	0	0	0	0	0	0	0	0	0	0	0	0	0	0	0	0	0	0	0	0	0	0	0	0	0	0	0	0	0	0	0	0	0	0	0	0	0	0	0	0	0	0	0	0	0
	Gov Eq 1 (39)	0	0	0	0	0	0	0	0	0	0	0	0	0	0	0	0	0	0	0	0	0	0	0	0	0	0	0	0	0	0	0	0	0	0	0	0	0	0	0	0	0	0	0	0	0	0	0	0
	Gov Eq 2 (39)	0	0	0	0	0	0	0	0	0	0	0	0	0	0	0	0	0	0	0	0	0	0	0	0	0	0	0	0	0	0	0	0	0	0	0	0	0	0	0	0	0	0	0	0	0	0	0	0
	Gov Eq 1 (40)	0	0	0	0	0	0	0	0	0	0	0	0	0	0	0	0	0	0	0	0	0	0	0	0	0	0	0	0	0	0	0	0	0	0	0	0	0	0	0	0	0	0	0	0	0	0	0	0
	Gov Eq 2 (40)	0	0	0	0	0	0	0	0	0	0	0	0	0	0	0	0	0	0	0	0	0	0	0	0	0	0	0	0	0	0	0	0	0	0	0	0	0	0	0	0	0	0	0	0	0	0	0	0
	Gov Eq 1 (41)	0	0	0	0	0	0	0	0	0	0	0	0	0	0	0	0	0	0	0	0	0	0	0	0	0	0	0	0	0	0	0	0	0	0	0	0	0	0	0	0	0	0	0	0	0	0	0	0
	Gov Eq 2 (41)	0	0	0	0	0	0	0	0	0	0	0	0	0	0	0	0	0	0	0	0	0	0	0	0	0	0	0	0	0	0	0	0	0	0	0	0	0	0	0	0	0	0	0	0	0	0	0	0
	Bo Co 1 (1)	0	0	1	0	0	0	0	0	0	0	0	0	0	0	0	0	0	0	0	0	0	0	0	0	0	0	0	0	0	0	0	0	0	0	0	0	0	0	0	0	0	0	0	0	0	0	0	0
	Bo Co 2 (1)	0	0	0	1	0	0	0	0	0	0	0	0	0	0	0	0	0	0	0	0	0	0	0	0	0	0	0	0	0	0	0	0	0	0	0	0	0	0	0	0	0	0	0	0	0	0	0	0
	Bo Co 1 (41)	0	0	0	0	0	0	0	0	0	0	0	0	0	0	0	0	0	0	0	0	0	0	0	0	0	0	0	0	0	0	0	0	0	0	0	0	0	0	0	0	0	0	0	0	0	0	0	0
	Bo Co 2 (41)	0	0	0	0	0	0	0	0	0	0	0	0	0	0	0	0	0	0	0	0	0	0	0	0	0	0	0	0	0	0	0	0	0	0	0	0	0	0	0	0	0	0	0	0	0	0	0	0
[truncated: 38 more columns]
